# Supplementary material for: Ethyl Acetylsalicylate (E-ASA) Protects Against Myocardial Ischemia-Reperfusion Injury
Source: Research Square preprint supplement (doi:10.21203/rs.3.rs-8019780/v1), 2025-11-24
Supplement: Supplementary file 1 [file 61f92a0e9bbf055a19e8bc61.xlsx]

## Sheet: Raw data
Supplementary Table 1（Raw data）：4D‑Label‑Free Acetylation Mass Spectrometry Analysis of Cardiac Tissue from Mice Treated with E‑ASA for Three Weeks and Vehicle Controls
Proteins：Protein IDs
Positions within proteins：The position of the site in the protein sequence
Leading proteins：Proteins with a high degree of matching
Protein：Major protein
Fasta headers：The corresponding protein descriptions in the database
Localization prob：Site credibility
PEP：Posterior error probability
Delta score：System scoring
Number of Acetyl (K)：Number of acetylation sites
Amino acid：Amino acids that have undergone acetylation
Sequence window：Sequence window (centered on acetylated modified amino acids)
Modification window：Acetylation modifies the position of amino acids in the sequence window
Peptide window coverage：The position of the identified peptide in the sequence window
Acetyl (K) Probabilities：The probability of acetylation modification occurring
Position in peptide：The position of the modification site in the peptide segment
Charge：Peptide charge
Mass error [ppm]：Quality erro
Potential contaminant：Potential pollutants
MS/MS IDs：Secondary spectrum ID
Best localization MS/MS ID：The best matching secondary spectrum ID
E-AsA-1：E-ASA group sample replicate 1
E-AsA-2：E-ASA group sample replicate 2
E-AsA-3：E-ASA group sample replicate 3
Vehicle-1：Vehicle group sample replicate 1
Vehicle-2：Vehicle group sample replicate 2
Vehicle-3：Vehicle group sample replicate 3
Proteins	Positions within proteins	Leading proteins	Protein	Fasta headers	Localization prob	PEP	Delta score	Number of Acetyl (K)	Amino acid	Sequence window	Modification window	Peptide window coverage	Acetyl (K) Probabilities	Position in peptide	Charge	Mass error [ppm]	Potential contaminant	MS/MS IDs	Best localization MS/MS ID	E-AsA-1	E-AsA-2	E-AsA-3	Vehicle-1	Vehicle-2	Vehicle-3
A2AGH6	1773	A2AGH6	A2AGH6	sp|A2AGH6|MED12_MOUSE Mediator of RNA polymerase II transcription subunit 12 OS=Mus musculus OX=10090 GN=Med12 PE=1 SV=1	1	9.13483e-05	71.678	1	K	LLEPEKKAPEPPKTDKPGAAPPSTEERKKKS	X;X;X;X;X;X;X;X;X;X;X;X;X;X;X;Acetyl (K);X;X;X;X;X;X;X;X;X;X;X;X;X;X;X	XXXXXXXXXXXXXPPPPPPPPPPPPPPXXXX	TDK(1)PGAAPPSTEER	3	2	-0.436		28706;28707;28708;28709;28710;28711	28711	11910	16620	20572	21041	13871	19406
A2APY7	114	A2APY7	A2APY7	sp|A2APY7|NDUF5_MOUSE Arginine-hydroxylase NDUFAF5, mitochondrial OS=Mus musculus OX=10090 GN=Ndufaf5 PE=1 SV=1	1	4.35688e-23	122.01	1	K	GRGYIAQHLDKETVGKIFQTDIAEHALKNSL	X;X;X;X;X;X;X;X;X;X;X;X;X;X;X;Acetyl (K);X;X;X;X;X;X;X;X;X;X;X;X;X;X;X	XXXXXXXXXXXPPPPPPPPPPPPPPPPPXXX	ETVGK(1)IFQTDIAEHALK	5	2	-0.39207		5417;5418;5419;5420;5421;5422	5422	66055	78339	104640	57858	69308	66623
A2APY7	109	A2APY7	A2APY7	sp|A2APY7|NDUF5_MOUSE Arginine-hydroxylase NDUFAF5, mitochondrial OS=Mus musculus OX=10090 GN=Ndufaf5 PE=1 SV=1	1	7.72331e-06	91.517	1	K	LDIGCGRGYIAQHLDKETVGKIFQTDIAEHA	X;X;X;X;X;X;X;X;X;X;X;X;X;X;X;Acetyl (K);X;X;X;X;Acetyl (K);X;X;X;X;X;X;X;X;X;X	XXXXXXXPPPPPPPPPPPPPPXXXXXXXXXX	GYIAQHLDK(1)ETVGK	9	2	-2.608		9876;9877;9878	9878	3969.5	6589.9	0	0	0	4038.1
A2ASS6	21904	A2ASS6	A2ASS6	sp|A2ASS6|TITIN_MOUSE Titin OS=Mus musculus OX=10090 GN=Ttn PE=1 SV=1	1	2.02558e-11	122.32	1	K	PKDDGGSEITNYVLEKRDSVNNKWVTCASAV	X;X;X;X;X;X;X;X;X;X;X;X;X;X;X;Acetyl (K);X;X;X;X;X;X;X;X;X;X;X;X;X;X;X	XXPPPPPPPPPPPPPPPXXXXXXXXXXXXXX	DDGGSEITNYVLEK(1)R	14	2	-0.48791		3404;3405	3405	0	0	15871	12066	0	0
A2ASS6	26047	A2ASS6	A2ASS6	sp|A2ASS6|TITIN_MOUSE Titin OS=Mus musculus OX=10090 GN=Ttn PE=1 SV=1	1	0.000519899	113.59	1	K	RILGYVVEMQPKGTEKWSVVAESKVCNAVVS	X;X;X;X;X;X;X;X;X;X;X;X;X;X;X;Acetyl (K);X;X;X;X;X;X;X;X;X;X;X;X;X;X;X	XXXXXXXXXXXXPPPPPPPPPPPPXXXXXXX	GTEK(1)WSVVAESK	4	2	-0.29731		9411;9412;9413;9414;9415;9416	9416	25901	23008	19707	42888	16319	27285
A2ASS6	34402	A2ASS6	A2ASS6	sp|A2ASS6|TITIN_MOUSE Titin OS=Mus musculus OX=10090 GN=Ttn PE=1 SV=1	1	0.00280371	85.347	1	K	GQVVSTSARHQVTTTKYKSTFEISSVQASDE	X;X;X;X;X;X;X;X;X;X;X;X;X;X;X;Acetyl (K);X;X;X;X;X;X;X;X;X;X;X;X;X;X;X	XXXXXXXXXPPPPPPPPPXXXXXXXXXXXXX	HQVTTTK(1)YK	7	2	-0.67102		11694	11694	0	0	0	10573	0	0
A2ASS6	20338	A2ASS6	A2ASS6	sp|A2ASS6|TITIN_MOUSE Titin OS=Mus musculus OX=10090 GN=Ttn PE=1 SV=1	1	0.00294706	47.332	1	K	EMRPKIADASPDEGWKRCNAAAQLIRMEFTV	X;X;X;X;X;X;X;X;X;X;X;X;X;X;X;Acetyl (K);X;X;X;X;X;X;X;X;X;X;X;X;X;X;X	XXXXXPPPPPPPPPPPPXXXXXXXXXXXXXX	IADASPDEGWK(1)R	11	2	-1.3765		12518;12519	12519	0	0	46682	9940.7	0	0
A2ASS6	13461	A2ASS6	A2ASS6	sp|A2ASS6|TITIN_MOUSE Titin OS=Mus musculus OX=10090 GN=Ttn PE=1 SV=1	0.999993	7.71148e-06	92.559	1	K	KVLEADPYFTVKLHDKTGVEKDEIILKCEVS	X;X;X;X;X;X;X;X;X;X;X;X;X;X;X;Acetyl (K);X;X;X;X;X;X;X;X;X;X;X;X;X;X;X	XXXXXXXXXXXXPPPPPPPPPPPPPPPXXXX	LHDK(1)TGVEKDEIILK	4	2	-0.93482		16589;16590;16591;16592;16593	16590	4010.6	8427.2	2610.4	35408	0	0
A2ASS6	13401	A2ASS6	A2ASS6	sp|A2ASS6|TITIN_MOUSE Titin OS=Mus musculus OX=10090 GN=Ttn PE=1 SV=1	1	1.47528e-09	110.84	1	K	LSHEKMHVVWFKNDVKLHTTRTVLMSSEGKT	X;X;X;X;X;X;X;X;X;X;X;X;X;X;X;Acetyl (K);X;X;X;X;X;X;X;X;X;X;X;X;X;X;X	XXXXXXXXXXXXPPPPPPPPPXXXXXXXXXX	NDVK(1)LHTTR	4	2	-0.43729		20807;20808;20809;20810;20811;20812	20812	18466	18860	21132	70582	13959	28005
A2ASS6	20093	A2ASS6	A2ASS6	sp|A2ASS6|TITIN_MOUSE Titin OS=Mus musculus OX=10090 GN=Ttn PE=1 SV=1	1	0.00405468	45.576	1	K	ATVNVLDKPGPVRNLKITDVSSDRCTIRWDP	X;X;X;X;X;X;X;X;X;X;X;X;X;X;X;Acetyl (K);X;X;X;X;X;X;X;X;X;X;X;X;X;X;X	XXXXXXXXXXXXXPPPPPPPPPPPXXXXXXX	NLK(1)ITDVSSDR	3	2	-0.5598		21230;21231;21232	21232	0	0	10686	34094	9883.1	0
A2ASS6	17515	A2ASS6	A2ASS6	sp|A2ASS6|TITIN_MOUSE Titin OS=Mus musculus OX=10090 GN=Ttn PE=1 SV=1	1	0.00782544	53.118	1	K	PEVKDKTKSSISLAWKPPAKDGGSPIKGYIV	X;X;X;X;X;X;X;X;X;X;X;X;X;X;X;Acetyl (K);X;X;X;X;X;X;X;X;X;X;X;X;X;X;X	XXXXXXXXPPPPPPPPPPPPXXXXXXXXXXX	SSISLAWK(1)PPAK	8	2	-2.379		26998	26998	0	0	24326	0	0	0
A2ASS6	22709	A2ASS6	A2ASS6	sp|A2ASS6|TITIN_MOUSE Titin OS=Mus musculus OX=10090 GN=Ttn PE=1 SV=1	1	0.000696643	69.896	1	K	EKREATRKSYSTVTTKCHKCTYKVTGLTEGC	X;X;X;X;X;X;X;X;X;X;X;X;X;X;X;Acetyl (K);X;X;X;X;X;X;X;X;X;X;X;X;X;X;X	XXXXXXXXPPPPPPPPPPPXXXXXXXXXXXX	SYSTVTTK(1)CHK	8	2	-0.77505		27841	27841	0	0	0	5244.2	0	0
A2ASS6	31303	A2ASS6	A2ASS6	sp|A2ASS6|TITIN_MOUSE Titin OS=Mus musculus OX=10090 GN=Ttn PE=1 SV=1	1	1.56976e-09	121.09	1	K	YSLLIVDKVNRYDAGKYTIEAENQSGKKSAT	X;X;X;X;X;X;X;X;X;X;X;X;X;X;X;Acetyl (K);X;X;X;X;X;X;X;X;X;X;X;X;X;X;X	XXXXXXXXXXXPPPPPPPPPPPPPPPPXXXX	YDAGK(1)YTIEAENQSGK	5	2	0.05601		38882	38882	0	0	0	7747.1	0	0
B1AR13	124	B1AR13	B1AR13	sp|B1AR13|CISD3_MOUSE CDGSH iron-sulfur domain-containing protein 3, mitochondrial OS=Mus musculus OX=10090 GN=Cisd3 PE=1 SV=1	1	0.000250954	75.868	1	K	TCKATQRPPYCDGTHKSEQVQKAEVGSPL__	X;X;X;X;X;X;X;X;X;X;X;X;X;X;X;Acetyl (K);X;X;X;X;X;X;X;X;X;X;X;X;X;X;X	XXXPPPPPPPPPPPPPPPPPPPXXXXXXXXX	ATQRPPYCDGTHK(1)SEQVQK	13	3	-1.422		2582;2583	2583	66739	0	0	0	0	99465
B2RWS6	14	B2RWS6	B2RWS6	sp|B2RWS6|EP300_MOUSE Histone acetyltransferase p300 OS=Mus musculus OX=10090 GN=Ep300 PE=1 SV=2	1	0.00148112	67.027	1	K	__MAENVVEPGPPSAKRPKLSSPALSASASD	X;X;X;X;X;X;X;X;X;X;X;X;X;X;X;Acetyl (K);X;X;X;X;X;X;X;X;X;X;X;X;X;X;X	XXXPPPPPPPPPPPPPPXXXXXXXXXXXXXX	AENVVEPGPPSAK(1)R	13	2	1.0665		634;635;636;637;638	638	75027	0	79508	51183	72266	63891
B2RWS6	1541	B2RWS6	B2RWS6	sp|B2RWS6|EP300_MOUSE Histone acetyltransferase p300 OS=Mus musculus OX=10090 GN=Ep300 PE=1 SV=2	1	3.7328e-109	235.49	2	K	RKREENTSNESTDVTKGDSKNAKKKNNKKTS	X;X;X;X;X;X;X;X;X;X;X;X;X;X;X;Acetyl (K);X;X;X;Acetyl (K);X;X;X;X;X;X;X;X;X;X;X	XXXPPPPPPPPPPPPPPPPPPPPXXXXXXXX	EENTSNESTDVTK(1)GDSK(1)NAK	13	2	-1.5933		4600;4601;4602;4603;4604;4605	4605	202470	183560	243190	256730	218110	230660
B2RWS6	1545	B2RWS6	B2RWS6	sp|B2RWS6|EP300_MOUSE Histone acetyltransferase p300 OS=Mus musculus OX=10090 GN=Ep300 PE=1 SV=2	1	3.7328e-109	235.49	2	K	ENTSNESTDVTKGDSKNAKKKNNKKTSKNKS	X;X;X;X;X;X;X;X;X;X;X;Acetyl (K);X;X;X;Acetyl (K);X;X;X;X;X;X;X;X;X;X;X;X;X;X;X	PPPPPPPPPPPPPPPPPPPXXXXXXXXXXXX	EENTSNESTDVTK(1)GDSK(1)NAK	17	2	-1.5933		4600;4601;4602;4603;4604;4605	4605	202470	183560	243190	256730	218110	230660
B2RWS6;P45481	1673;1712	B2RWS6;P45481	P45481	sp|B2RWS6|EP300_MOUSE Histone acetyltransferase p300 OS=Mus musculus OX=10090 GN=Ep300 PE=1 SV=2;sp|P45481|CBP_MOUSE Histone lysine acetyltransferase CREBBP OS=Mus musculus OX=10090 GN=Crebbp PE=1 SV=3	1	2.52615e-07	89.876	1	K	HTQGQDRFVYTCNECKHHVETRWHCTVCEDY;HTQSQDRFVYTCNECKHHVETRWHCTVCEDY	X;X;X;X;X;X;X;X;X;X;X;X;X;X;X;Acetyl (K);X;X;X;X;X;X;X;X;X;X;X;X;X;X;X	XXXXXXXPPPPPPPPPPPPPPPXXXXXXXXX	FVYTCNECK(1)HHVETR	9	3	0.13531		7269;7270;7271;7272;7273;7274;7275	7275	61818	60324	64248	66392	47402	54971
B2RWS6;P45481	1589;1628	B2RWS6;P45481	P45481	sp|B2RWS6|EP300_MOUSE Histone acetyltransferase p300 OS=Mus musculus OX=10090 GN=Ep300 PE=1 SV=2;sp|P45481|CBP_MOUSE Histone lysine acetyltransferase CREBBP OS=Mus musculus OX=10090 GN=Crebbp PE=1 SV=3	1	0.0024101	63.667	1	K	NVSNDLSQKLYATMEKHKEVFFVIHLHAGPV;NVSNDLSQKLYATMEKHKEVFFVIRLIACPA	X;X;X;X;X;X;X;X;X;X;X;X;X;X;X;Acetyl (K);X;X;X;X;X;X;X;X;X;X;X;X;X;X;X	XXXXXXXXXPPPPPPPPPXXXXXXXXXXXXX	LYATMEK(1)HK	7	2	-0.49591		19291;19292;19293;19294;19295;19296	19296	114710	118490	130510	128580	105030	111620
B2RWS6;P45481	1759;1798	B2RWS6;P45481	P45481	sp|B2RWS6|EP300_MOUSE Histone acetyltransferase p300 OS=Mus musculus OX=10090 GN=Ep300 PE=1 SV=2;sp|P45481|CBP_MOUSE Histone lysine acetyltransferase CREBBP OS=Mus musculus OX=10090 GN=Crebbp PE=1 SV=3	1	8.17237e-06	154.63	1;2	K	ACQCRNANCSLPSCQKMKRVVQHTKGCKRKT	X;X;X;X;X;X;X;X;X;X;X;X;X;X;X;Acetyl (K);Oxidation (M);Acetyl (K);X;X;X;X;X;X;X;X;X;X;X;X;X	XXXXXPPPPPPPPPPPPPPXXXXXXXXXXXX	NANCSLPSCQK(1)MK(1)R	11	2	-0.69005		20722;20723;20724;20725;20726;20727;20728	20728	151740	128140	177430	139960	109510	128190
B2RWS6;P45481	1761;1800	B2RWS6;P45481	P45481	sp|B2RWS6|EP300_MOUSE Histone acetyltransferase p300 OS=Mus musculus OX=10090 GN=Ep300 PE=1 SV=2;sp|P45481|CBP_MOUSE Histone lysine acetyltransferase CREBBP OS=Mus musculus OX=10090 GN=Crebbp PE=1 SV=3	1	0.002633	73.537	2	K	QCRNANCSLPSCQKMKRVVQHTKGCKRKTNG	X;X;X;X;X;X;X;X;X;X;X;X;X;Acetyl (K);Oxidation (M);Acetyl (K);X;X;X;X;X;X;X;X;X;X;X;X;X;X;X	XXXPPPPPPPPPPPPPPXXXXXXXXXXXXXX	NANCSLPSCQK(1)MK(1)R	13	2	-0.69005		20728	20728	0	0	7554.9	0	0	0
B7ZMP1	78	B7ZMP1	B7ZMP1	sp|B7ZMP1|XPP3_MOUSE Xaa-Pro aminopeptidase 3 OS=Mus musculus OX=10090 GN=Xpnpep3 PE=1 SV=1	1	0.00504505	62.386	1	K	VTPGLSQVEYALRRHKLMALVHKEAQGHSGT	X;X;X;X;X;X;X;X;X;X;X;X;X;X;X;Acetyl (K);X;X;X;X;X;X;X;X;X;X;X;X;X;X;X	XXXXXXXXXXXXXXPPPPPPPPPXXXXXXXX	HK(1)LMALVHK	2	2	-1.7442		10992;10993	10993	17325	0	10310	0	0	0
E9Q3L2	610	E9Q3L2	E9Q3L2	sp|E9Q3L2|PI4KA_MOUSE Phosphatidylinositol 4-kinase alpha OS=Mus musculus OX=10090 GN=Pi4ka PE=1 SV=2	1	9.81805e-11	93.528	1	K	LASLSNRLYISQESDKDAHLIPDHTIRALGH	X;X;X;X;X;X;X;X;X;X;X;X;X;X;X;Acetyl (K);X;X;X;X;X;X;X;X;X;X;X;X;X;X;X	XXXXXXXPPPPPPPPPPPPPPPPPPPPXXXX	LYISQESDK(1)DAHLIPDHTIR	9	3	-3.8656		19353;19354;19355;19356;19357	19357	0	24938	27973	18127	23386	21060
E9Q401	1141	E9Q401	E9Q401	sp|E9Q401|RYR2_MOUSE Ryanodine receptor 2 OS=Mus musculus OX=10090 GN=Ryr2 PE=1 SV=1	1	1.10018e-15	171.52	1	K	LELGSDDRAFAFDGFKAQRWHQGNEHYGRSW	X;X;X;X;X;X;X;X;X;X;X;X;X;X;X;Acetyl (K);X;X;X;X;X;X;X;X;X;X;X;X;X;X;X	XXXXXXXXPPPPPPPPPPPXXXXXXXXXXXX	AFAFDGFK(1)AQR	8	2	-3.6188		709;710;711;712;713;714	714	114100	104210	140120	110520	133170	120520
E9Q401	2139	E9Q401	E9Q401	sp|E9Q401|RYR2_MOUSE Ryanodine receptor 2 OS=Mus musculus OX=10090 GN=Ryr2 PE=1 SV=1	1	0.00178229	89.912	1	K	QIRSLLSVRMGKEEEKLMIRGLGDIMNNKVF	X;X;X;X;X;X;X;X;X;X;X;X;X;X;X;Acetyl (K);X;X;X;X;X;X;X;X;X;X;X;X;X;X;X	XXXXXXXXXPPPPPPPPPPPXXXXXXXXXXX	EEEK(1)LMIR	4	2	5.2744		4555;4556;19833;19834;19835;19836	4556	11406	22922	17696	13555	0	0
E9Q401	2722	E9Q401	E9Q401	sp|E9Q401|RYR2_MOUSE Ryanodine receptor 2 OS=Mus musculus OX=10090 GN=Ryr2 PE=1 SV=1	1	2.45984e-06	65.224	1	K	TSNITIPEKLEYFINKYAEHSHDKWSMDKLA	X;X;X;X;X;X;X;X;X;X;X;X;X;X;X;Acetyl (K);X;X;X;X;X;X;X;Acetyl (K);X;X;X;X;X;X;X	XXXXXXXXXPPPPPPPPPPPPPPPXXXXXXX	LEYFINK(1)YAEHSHDK	7	2	-1.0197		16053;16054;16055;16056;16057	16057	15622	12004	15716	0	8589.6	8077.8
E9Q401	2730	E9Q401	E9Q401	sp|E9Q401|RYR2_MOUSE Ryanodine receptor 2 OS=Mus musculus OX=10090 GN=Ryr2 PE=1 SV=1	1	0.00357796	55.335	1	K	KLEYFINKYAEHSHDKWSMDKLANGWIYGEI	X;X;X;X;X;X;X;X;X;X;X;X;X;X;X;Acetyl (K);X;X;X;X;X;X;X;X;X;X;X;X;X;X;X	XXXXXXXXPPPPPPPPPPPPPXXXXXXXXXX	YAEHSHDK(1)WSMDK	8	2	-2.1153		38814;38815;38816;38817;38818	38818	9955.8	8685.7	12122	0	6148.9	8156.1
E9Q401	3324	E9Q401	E9Q401	sp|E9Q401|RYR2_MOUSE Ryanodine receptor 2 OS=Mus musculus OX=10090 GN=Ryr2 PE=1 SV=1	1	0.0388997	42.914	1	K	VKPQLLKTHFLPLMEKLKKKAAMVVSEEDHL	X;X;X;X;X;X;X;X;X;X;X;X;X;X;X;Acetyl (K);X;X;X;X;X;X;X;X;X;X;X;X;X;X;X	XXXXXXXPPPPPPPPPPPXXXXXXXXXXXXX	THFLPLMEK(1)LK	9	2	-2.6536		30292;30293	30293	37364	0	24475	0	0	0
F6ZDS4	822	F6ZDS4	F6ZDS4	sp|F6ZDS4|TPR_MOUSE Nucleoprotein TPR OS=Mus musculus OX=10090 GN=Tpr PE=1 SV=1	1	4.50813e-06	101.14	1	K	EGYRREITSLQERNQKLTATTQKQEQIINTM	X;X;X;X;X;X;X;X;X;X;X;X;X;X;X;Acetyl (K);X;X;X;X;X;X;X;X;X;X;X;X;X;X;X	XXXXXXXXXXXXXPPPPPPPPPPXXXXXXXX	NQK(1)LTATTQK	3	2	-0.93272		21485;21486;21487;21488;21489;21490	21490	279520	229030	282580	269990	238480	241200
O08528	488	O08528	O08528	sp|O08528|HXK2_MOUSE Hexokinase-2 OS=Mus musculus OX=10090 GN=Hk2 PE=1 SV=1	1	0.00672384	37.262	1	K	TLESLKLSHEQLLEVKRRMKVEMEQGLSKET	X;X;X;X;X;X;X;X;X;X;X;X;X;X;X;Acetyl (K);X;X;X;X;X;X;X;X;X;X;X;X;X;X;X	XXXXXXPPPPPPPPPPPXXXXXXXXXXXXXX	LSHEQLLEVK(1)R	10	2	-2.0208		18529	18529	0	7776.9	0	0	0	0
O08709	63	O08709	O08709	sp|O08709|PRDX6_MOUSE Peroxiredoxin-6 OS=Mus musculus OX=10090 GN=Prdx6 PE=1 SV=3	1	0.0152581	51.668	1	K	TTELGRAAKLAPEFAKRNVKLIALSIDSVED	X;X;X;X;X;X;X;X;X;X;X;X;X;X;X;Acetyl (K);X;X;X;X;X;X;X;X;X;X;X;X;X;X;X	XXXXXXXXXPPPPPPPPXXXXXXXXXXXXXX	LAPEFAK(1)R	7	2	-0.35416		15460;15461;15462	15462	69457	63374	0	0	37863	0
O08709	144	O08709	O08709	sp|O08709|PRDX6_MOUSE Peroxiredoxin-6 OS=Mus musculus OX=10090 GN=Prdx6 PE=1 SV=3	1	2.63767e-07	67.476	1	K	VTARVVFIFGPDKKLKLSILYPATTGRNFDE	X;X;X;X;X;X;X;X;X;X;X;X;X;X;X;Acetyl (K);X;X;X;X;X;X;X;X;X;X;X;X;X;X;X	XXXXXXXXXXXXXXPPPPPPPPPPPPPXXXX	LK(1)LSILYPATTGR	2	2	1.888		17234;17235;17236;17237	17237	18105	19800	16459	0	7116.4	0
O08749	143	O08749	O08749	sp|O08749|DLDH_MOUSE Dihydrolipoyl dehydrogenase, mitochondrial OS=Mus musculus OX=10090 GN=Dld PE=1 SV=2	1	6.6442e-54	243.82	1;2	K	HSAVKALTGGIAHLFKQNKVVHVNGFGKITG	X;X;X;X;Acetyl (K);X;X;X;X;X;X;X;X;X;X;Acetyl (K);X;X;X;X;X;X;X;X;X;X;X;Acetyl (K);X;X;X	PPPPPPPPPPPPPPPPPPPXXXXXXXXXXXX	HSAVK(1)ALTGGIAHLFK(1)QNK	16	3	-1.3226		1735;1736;1737;1738;1739;1740;1741;1742;1743;1744;1745;11719;11720;11721;11722;11723	11723	12110000	10866000	12202000	6538600	10965000	10367000
O08749	273	O08749	O08749	sp|O08749|DLDH_MOUSE Dihydrolipoyl dehydrogenase, mitochondrial OS=Mus musculus OX=10090 GN=Dld PE=1 SV=2	1	0.00164091	80.989	2	K	SKNFQRILQRQGFKFKLNTKVTGATKKSDGK	X;X;X;X;X;X;X;X;X;X;X;X;X;X;X;Acetyl (K);X;X;X;Acetyl (K);X;X;X;X;X;X;X;X;X;X;X	XXXXXXXXXXXXXXPPPPPPPPPPPPXXXXX	FK(1)LNTK(1)VTGATK	2	2	4.8606		6428;6429;6430	6430	0	40731	33854	0	0	42566
O08749	277	O08749	O08749	sp|O08749|DLDH_MOUSE Dihydrolipoyl dehydrogenase, mitochondrial OS=Mus musculus OX=10090 GN=Dld PE=1 SV=2	1	6.77656e-06	77.553	1;2	K	QRILQRQGFKFKLNTKVTGATKKSDGKIDVS	X;X;X;X;X;X;X;X;X;X;X;Acetyl (K);X;X;X;Acetyl (K);X;X;X;X;X;X;X;X;X;X;X;X;X;X;X	XXXXXXXXXXPPPPPPPPPPPPXXXXXXXXX	LNTK(1)VTGATK	4	1	-0.89009		6428;6429;6430;18135;18136;18137;18138;18139;18140;18141;18142;18143;18144;18145	18145	4530800	4109600	4472800	3735800	3769500	3933400
O08749	132	O08749	O08749	sp|O08749|DLDH_MOUSE Dihydrolipoyl dehydrogenase, mitochondrial OS=Mus musculus OX=10090 GN=Dld PE=1 SV=2	1	2.39886e-56	248.66	1;2	K	RLNLEKMMEQKHSAVKALTGGIAHLFKQNKV	X;X;X;X;X;Acetyl (K);Oxidation (M);Oxidation (M);X;X;X;X;X;X;X;Acetyl (K);X;X;X;X;X;X;X;X;X;X;Acetyl (K);X;X;X;X	XXXXXXXXXXXPPPPPPPPPPPPPPPPPPPX	HSAVK(1)ALTGGIAHLFK(1)QNK	5	3	-1.3226		11707;11708;11709;11710;11711;11712;11713;11714;11715;11716;11717;11718;11719;11720;11721;11722;11723	11723	1038800	977940	1115200	438020	1080200	968440
O08749	159	O08749	O08749	sp|O08749|DLDH_MOUSE Dihydrolipoyl dehydrogenase, mitochondrial OS=Mus musculus OX=10090 GN=Dld PE=1 SV=2	1	0.000316262	112.55	1	K	QNKVVHVNGFGKITGKNQVTATKADGSTQVI	X;X;X;X;X;X;X;X;X;X;X;X;X;X;X;Acetyl (K);X;X;X;X;X;X;X;X;X;X;X;X;X;X;X	XXXXXXXXXXXXPPPPPPPPPPPXXXXXXXX	ITGK(1)NQVTATK	4	2	-0.38516		14313;14314;14315;14316;14317;14318	14318	110400	133960	102030	152340	112830	132490
O08749	122	O08749	O08749	sp|O08749|DLDH_MOUSE Dihydrolipoyl dehydrogenase, mitochondrial OS=Mus musculus OX=10090 GN=Dld PE=1 SV=2	1	9.81947e-45	238.18	1	K	ASRGIEIPEVRLNLEKMMEQKHSAVKALTGG	X;X;X;X;X;X;X;X;X;X;X;X;X;X;X;Acetyl (K);Oxidation (M);Oxidation (M);X;X;Acetyl (K);X;X;X;X;Acetyl (K);X;X;X;X;X	XXXXXXXXXXXPPPPPPPPPPXXXXXXXXXX	LNLEK(1)MMEQK	5	2	-1.0619		18048;18049;18050;18051;18052;18053;18054;18055;18056;18057;18058;18059;18060;18061;18062;18063;18064;18065;18066;18067;18068;18069;18070;18071;18072;18073	18073	5111000	3875900	4923900	3467500	3916800	3693700
O08749	127	O08749	O08749	sp|O08749|DLDH_MOUSE Dihydrolipoyl dehydrogenase, mitochondrial OS=Mus musculus OX=10090 GN=Dld PE=1 SV=2	1	7.10036e-09	114.84	1	K	EIPEVRLNLEKMMEQKHSAVKALTGGIAHLF	X;X;X;X;X;X;X;X;X;X;X;X;Oxidation (M);X;X;Acetyl (K);X;X;X;X;Acetyl (K);X;X;X;X;X;X;X;X;X;X	XXXXXXXXXXXPPPPPPPPPPXXXXXXXXXX	MMEQK(1)HSAVK	5	2	1.3349		20196;20197;20198;20199;20200;20201;20202	20202	159250	167670	199410	110410	148640	144760
O08749	66	O08749	O08749	sp|O08749|DLDH_MOUSE Dihydrolipoyl dehydrogenase, mitochondrial OS=Mus musculus OX=10090 GN=Dld PE=1 SV=2	1	3.11005e-05	145.54	1	K	PGGYVAAIKSAQLGFKTVCIEKNETLGGTCL	X;X;X;X;X;X;X;X;X;X;X;X;X;X;X;Acetyl (K);X;X;X;X;X;X;X;X;X;X;X;X;X;X;X	XXXXXXXXXPPPPPPPPPPPPPXXXXXXXXX	SAQLGFK(1)TVCIEK	7	2	-1.2421		24452;24453;24454;24455;24456;24457	24457	346780	371540	489500	349500	439330	356390
O08749	410	O08749	O08749	sp|O08749|DLDH_MOUSE Dihydrolipoyl dehydrogenase, mitochondrial OS=Mus musculus OX=10090 GN=Dld PE=1 SV=2	1	6.59258e-100	244.38	1	K	THPEVAWVGKSEEQLKEEGIEFKIGKFPFAA	X;X;X;X;X;X;X;X;X;X;X;X;X;X;X;Acetyl (K);X;X;X;X;X;X;X;X;X;Acetyl (K);X;X;X;X;X	XXXXXXXXXXPPPPPPPPPPPPPXXXXXXXX	SEEQLK(1)EEGIEFK	6	2	0.05377		24832;24833;24834;24835;24836;24837;24838	24838	2527900	2586100	2763200	2594500	2536200	2347600
O08749	417	O08749	O08749	sp|O08749|DLDH_MOUSE Dihydrolipoyl dehydrogenase, mitochondrial OS=Mus musculus OX=10090 GN=Dld PE=1 SV=2	0.999993	0.000298983	61.648	1	K	VGKSEEQLKEEGIEFKIGKFPFAANSRAKTN	X;X;X;X;X;X;X;X;X;X;X;X;X;X;X;Acetyl (K);X;X;Acetyl (K);X;X;X;X;X;X;X;X;X;X;X;X	XXXPPPPPPPPPPPPPPPPXXXXXXXXXXXX	SEEQLKEEGIEFK(1)IGK	13	2	-1.9419		24839;24840;24841	24841	42966	43525	55785	0	0	0
O08749	440	O08749	O08749	sp|O08749|DLDH_MOUSE Dihydrolipoyl dehydrogenase, mitochondrial OS=Mus musculus OX=10090 GN=Dld PE=1 SV=2	1	1.61005e-08	138.71	1	K	ANSRAKTNADTDGMVKILGHKSTDRVLGAHI	X;X;X;X;X;X;X;X;X;X;X;X;X;X;X;Acetyl (K);X;X;X;X;X;X;X;X;X;X;X;X;X;X;X	XXXXXXPPPPPPPPPPPPPPPXXXXXXXXXX	TNADTDGMVK(1)ILGHK	10	2	0.35988		32180;32181	32181	10491	13141	0	0	0	0
O08749	155	O08749	O08749	sp|O08749|DLDH_MOUSE Dihydrolipoyl dehydrogenase, mitochondrial OS=Mus musculus OX=10090 GN=Dld PE=1 SV=2	1	0.000562818	45.671	1	K	HLFKQNKVVHVNGFGKITGKNQVTATKADGS	X;X;X;Acetyl (K);X;X;X;X;X;X;X;X;X;X;X;Acetyl (K);X;X;X;Acetyl (K);X;X;X;X;X;X;X;X;X;X;X	XXXXXXXPPPPPPPPPPPPPXXXXXXXXXXX	VVHVNGFGK(1)ITGK	9	2	-0.35331		37937;37938;37939;37940;37941;37942	37942	37185	35451	35618	31215	38540	36663
O08756	53	O08756	O08756	sp|O08756|HCD2_MOUSE 3-hydroxyacyl-CoA dehydrogenase type-2 OS=Mus musculus OX=10090 GN=Hsd17b10 PE=1 SV=4	1	1.91491e-18	161.61	1	K	VLLDVPDSEGESQAKKLGESCIFAPANVTSE	X;X;X;X;X;X;X;X;X;X;X;X;X;X;X;Acetyl (K);X;X;X;X;X;X;X;X;X;X;X;X;X;X;X	XXXXXXXXXXXXXXXPPPPPPPPPPPPPPPP	K(1)LGESCIFAPANVTSEK	1	2	-2.7514		15143;15144;15145;15146;15147;15148	15148	23927	49803	45723	52556	32878	22853
O08756	107	O08756	O08756	sp|O08756|HCD2_MOUSE 3-hydroxyacyl-CoA dehydrogenase type-2 OS=Mus musculus OX=10090 GN=Hsd17b10 PE=1 SV=4	1	2.94788e-07	142.02	1	K	AGIAVAIKTYHQKKNKIHTLEDFQRVINVNL	X;X;X;X;X;X;X;X;X;X;X;X;X;X;X;Acetyl (K);X;X;X;X;X;X;X;X;X;X;X;X;X;X;X	XXXXXXXXXXXXXXPPPPPPPPPPPXXXXXX	NK(1)IHTLEDFQR	2	2	2.0728		21153;21154;21155;21156;21157;21158	21158	18757	31513	15059	24182	30823	27834
O08756	212	O08756	O08756	sp|O08756|HCD2_MOUSE 3-hydroxyacyl-CoA dehydrogenase type-2 OS=Mus musculus OX=10090 GN=Hsd17b10 PE=1 SV=4	1	3.75157e-13	101.55	1	K	APGLFATPLLTTLPEKVRNFLASQVPFPSRL	X;X;X;X;X;X;X;X;X;X;X;X;X;X;X;Acetyl (K);X;X;X;X;X;X;X;X;X;X;X;X;X;X;X	PPPPPPPPPPPPPPPPPPXXXXXXXXXXXXX	VVTIAPGLFATPLLTTLPEK(1)VR	20	2	-0.50432		38066	38066	0	0	12874	0	0	0
O08784	153	O08784	O08784	sp|O08784|TCOF_MOUSE Treacle protein OS=Mus musculus OX=10090 GN=Tcof1 PE=1 SV=1	1	0.000589723	78.909	1	K	SHPGSGKTVVHLLSGKSPKKSAEPLANTVLA	X;X;X;X;X;X;X;X;X;X;X;X;X;X;X;Acetyl (K);X;X;X;X;X;X;X;X;X;X;X;X;X;X;X	XXXXXXXPPPPPPPPPPPPXXXXXXXXXXXX	TVVHLLSGK(1)SPK	9	2	-1.1705		34576;34577;34578;34579;34580	34580	20346	25429	21570	0	16934	17778
O08997	60	O08997	O08997	sp|O08997|ATOX1_MOUSE Copper transport protein ATOX1 OS=Mus musculus OX=10090 GN=Atox1 PE=1 SV=1	1	0.0022473	55.189	1	K	EHSSDTLLATLNKTGKAVSYLGPK_______	X;X;X;X;X;X;X;X;X;X;X;X;X;X;X;Acetyl (K);X;X;X;X;X;X;X;X;X;X;X;X;X;X;X	XXXXXXXXXXXXXPPPPPPPPPPPXXXXXXX	TGK(1)AVSYLGPK	3	2	-1.2972		29937;29938;29939	29939	35585	0	0	31998	0	35087
O09111	43	O09111	O09111	sp|O09111|NDUBB_MOUSE NADH dehydrogenase [ubiquinone] 1 beta subcomplex subunit 11, mitochondrial OS=Mus musculus OX=10090 GN=Ndufb11 PE=1 SV=2	1	0.018539	50.155	1	K	RWESSRAVIAPSGVEKKRQREPTMQWQEDPE	X;X;X;X;X;X;X;X;X;X;X;X;X;X;X;Acetyl (K);X;X;X;X;X;X;X;X;X;X;X;X;X;X;X	XXXXXXPPPPPPPPPPPXXXXXXXXXXXXXX	AVIAPSGVEK(1)K	10	2	-0.33314		2704	2704	352940	0	0	0	0	0
O09117	180	O09117	O09117	sp|O09117|SYPL1_MOUSE Synaptophysin-like protein 1 OS=Mus musculus OX=10090 GN=Sypl1 PE=1 SV=2	1	0.00305635	64.611	1	K	WLVSSSAWAKALTDIKVATGHRIVEELEICN	X;X;X;X;X;X;X;X;X;X;X;X;X;X;X;Acetyl (K);X;X;X;X;X;X;X;X;X;X;X;X;X;X;X	XXXXXXXXXXPPPPPPPPPPPPXXXXXXXXX	ALTDIK(1)VATGHR	6	2	-0.27749		1728	1728	0	0	0	0	3406.1	0
O09131	189	O09131	O09131	sp|O09131|GSTO1_MOUSE Glutathione S-transferase omega-1 OS=Mus musculus OX=10090 GN=Gsto1 PE=1 SV=2	1	3.44701e-17	160.85	1	K	YLTWPWFQRLEALELKECLAHTPKLKLWMAA	X;X;X;X;X;X;X;X;X;X;X;X;X;X;X;Acetyl (K);X;X;X;X;X;X;X;X;X;X;X;X;X;X;X	XXXXXXXXXPPPPPPPPPPPPPPPXXXXXXX	LEALELK(1)ECLAHTPK	7	2	0.4186		15805;15806;15807;15808;15809;15810	15810	15918	21974	12875	5897.8	8372.7	3697.5
O09161	201	O09161	O09161	sp|O09161|CASQ2_MOUSE Calsequestrin-2 OS=Mus musculus OX=10090 GN=Casq2 PE=1 SV=3	1	0.000495792	79.406	1	K	AEHFQPYIKFFATFDKAVAKKLSLKMNEVGF	X;X;X;X;X;X;X;X;X;X;X;X;X;X;X;Acetyl (K);X;X;X;X;X;X;X;X;X;X;X;X;X;X;X	XXXXXXXXXPPPPPPPPPPPXXXXXXXXXXX	FFATFDK(1)AVAK	7	2	-1.7039		5951;5952;5953;5954;5955	5955	52409	27375	17731	0	15651	3369.5
O09161	172	O09161	O09161	sp|O09161|CASQ2_MOUSE Calsequestrin-2 OS=Mus musculus OX=10090 GN=Casq2 PE=1 SV=3	1	0.00153625	60.62	1	K	AFERIEDQTKLLGFFKNEDSEYYKAFQEAAE	X;X;X;X;X;X;X;X;X;X;X;X;X;X;X;Acetyl (K);X;X;X;X;X;X;X;X;X;X;X;X;X;X;X	XXXXXXXXXXPPPPPPPPPPPPPPXXXXXXX	LLGFFK(1)NEDSEYYK	6	2	-0.60942		17318;17319	17319	11423	2603.4	0	0	0	0
O09161	40	O09161	O09161	sp|O09161|CASQ2_MOUSE Calsequestrin-2 OS=Mus musculus OX=10090 GN=Casq2 PE=1 SV=3	1	0.0140327	35.367	1	K	FPTYDGKDRVVSLSEKNLKQMLKRYDLLCLY	X;X;X;X;X;X;X;X;X;X;X;X;X;X;X;Acetyl (K);X;X;X;X;X;X;X;X;X;X;X;X;X;X;X	XXXXXXXXXPPPPPPPPPPXXXXXXXXXXXX	VVSLSEK(1)NLK	7	2	-0.44474		38050	38050	118550	0	0	0	0	0
O09174	57	O09174	O09174	sp|O09174|AMACR_MOUSE Alpha-methylacyl-CoA racemase OS=Mus musculus OX=10090 GN=Amacr PE=1 SV=4	1	0.000292315	88.539	1	K	ENFLARGKRSLALDLKRSQGVTVLRRMCARA	X;X;X;X;X;X;X;X;X;X;X;X;X;X;X;Acetyl (K);X;X;X;X;X;X;X;X;X;X;X;X;X;X;X	XXXXXXXXXPPPPPPPPXXXXXXXXXXXXXX	SLALDLK(1)R	7	2	0.67309		25894;25895;25896;25897;25898;25899	25899	428560	351740	434920	358840	443690	434160
O35129	262	O35129	O35129	sp|O35129|PHB2_MOUSE Prohibitin-2 OS=Mus musculus OX=10090 GN=Phb2 PE=1 SV=1	1	8.94837e-43	239.64	1	K	GYIKLRKIRAAQNISKTIATSQNRIYLTADN	X;X;X;X;X;X;X;X;X;X;X;X;X;X;X;Acetyl (K);X;X;X;X;X;X;X;X;X;X;X;X;X;X;X	XXXXXXXXXPPPPPPPPPPPPPPPXXXXXXX	AAQNISK(1)TIATSQNR	7	2	-1.7375		224;225;226;227;228;229;230	230	39864	26989	35722	24283	29098	30891
O35129	200	O35129	O35129	sp|O35129|PHB2_MOUSE Prohibitin-2 OS=Mus musculus OX=10090 GN=Phb2 PE=1 SV=1	1	2.91721e-17	141	1	K	TELSFSREYTAAVEAKQVAQQEAQRAQFLVE	X;X;X;X;X;X;X;X;X;X;X;X;X;X;X;Acetyl (K);X;X;X;X;X;X;X;X;X;X;X;X;X;X;X	XXXXXXXPPPPPPPPPPPPPPPPPPXXXXXX	EYTAAVEAK(1)QVAQQEAQR	9	2	-1.6979		5585;5586;5587	5587	0	0	13654	0	8739.3	7452.1
O35129	244	O35129	O35129	sp|O35129|PHB2_MOUSE Prohibitin-2 OS=Mus musculus OX=10090 GN=Phb2 PE=1 SV=1	1	5.03605e-11	169.09	1	K	EGEAEAAKMLGEALSKNPGYIKLRKIRAAQN	X;X;X;X;X;X;X;X;X;X;X;X;X;X;X;Acetyl (K);X;X;X;X;X;X;X;X;X;X;X;X;X;X;X	XXXXXXXXPPPPPPPPPPPPPPXXXXXXXXX	MLGEALSK(1)NPGYIK	8	2	-2.2092		20047;20048;20049;20050;20051;20052	20052	19238	16546	17683	12666	14583	16630
O35129	147	O35129	O35129	sp|O35129|PHB2_MOUSE Prohibitin-2 OS=Mus musculus OX=10090 GN=Phb2 PE=1 SV=1	1	5.04927e-17	180.23	1	K	VLPSIVNEVLKSVVAKFNASQLITQRAQVSL	X;X;X;X;X;X;X;X;X;X;X;X;X;X;X;Acetyl (K);X;X;X;X;X;X;X;X;X;X;X;X;X;X;X	XXXXXXXXXXXPPPPPPPPPPPPPPPXXXXX	SVVAK(1)FNASQLITQR	5	2	-0.074998		27581;27582;27583;27584;27585	27585	20806	21965	31000	0	16277	13546
O35143	103	O35143	O35143	sp|O35143|ATIF1_MOUSE ATPase inhibitor, mitochondrial OS=Mus musculus OX=10090 GN=Atp5if1 PE=1 SV=2	1	0.00772932	60.962	1	K	LQKQIERHKKKIQQLKNNH____________	X;X;X;X;X;X;X;X;X;X;X;X;X;X;X;Acetyl (K);X;X;X;X;X;X;X;X;X;X;X;X;X;X;X	XXXXXXXXXXXPPPPPPPPXXXXXXXXXXXX	IQQLK(1)NNH	5	2	-0.65386		14092;14093;14094;14095	14095	53221	30217	0	0	24029	11982
O35459	76	O35459	O35459	sp|O35459|ECH1_MOUSE Delta(3,5)-Delta(2,4)-dienoyl-CoA isomerase, mitochondrial OS=Mus musculus OX=10090 GN=Ech1 PE=1 SV=1	1	7.44954e-06	128.02	1	K	SAQKHVLHVQLNRPEKRNAMNRAFWRELVEC	X;X;X;X;X;X;X;X;X;X;X;X;X;X;X;Acetyl (K);X;X;X;X;X;X;X;X;X;X;X;X;X;X;X	XXXXPPPPPPPPPPPPPXXXXXXXXXXXXXX	HVLHVQLNRPEK(1)R	12	3	-0.031826		12091;12092;12093;12094;12095;12096;12097;12098;12099;12100;12101;12102;12103	12103	477640	413040	423600	255480	349490	378340
O35459	230	O35459	O35459	sp|O35459|ECH1_MOUSE Delta(3,5)-Delta(2,4)-dienoyl-CoA isomerase, mitochondrial OS=Mus musculus OX=10090 GN=Ech1 PE=1 SV=1	1	0.00282718	89.119	1	K	IGNQSLVNELTFSARKMMADEALDSGLVSRV	X;X;X;X;X;X;X;X;X;X;X;X;X;X;X;Acetyl (K);X;X;X;X;X;X;X;X;X;X;X;X;X;X;X	XXXXXXXXXXXXXXXPPPPPPPPPPPPPPPX	K(1)MMADEALDSGLVSR	1	2	-2.3476		15164	15164	0	0	0	91655	0	0
O35459	316	O35459	O35459	sp|O35459|ECH1_MOUSE Delta(3,5)-Delta(2,4)-dienoyl-CoA isomerase, mitochondrial OS=Mus musculus OX=10090 GN=Ech1 PE=1 SV=1	1	0.000317061	62.047	1	K	LQTQDIIKSVQAAMEKRDTKSITFSKL____	X;X;X;X;X;X;X;X;X;X;X;X;X;Oxidation (M);X;Acetyl (K);X;X;X;X;X;X;X;X;X;X;X;X;X;X;X	XXXXXXXXPPPPPPPPPXXXXXXXXXXXXXX	SVQAAMEK(1)R	8	2	0.65642		27528;27529;27530;27531;27532;27533;27534;27535	27535	465950	354490	232760	119910	191910	138860
O35658	88	O35658	O35658	sp|O35658|C1QBP_MOUSE Complement component 1 Q subcomponent-binding protein, mitochondrial OS=Mus musculus OX=10090 GN=C1qbp PE=1 SV=1	1	5.05818e-23	165.99	1	K	TEGDKAFVEFLTDEIKEEKKIQKHKSLPKMS	X;X;X;X;X;X;X;X;X;X;X;X;X;X;X;Acetyl (K);X;X;X;X;X;X;X;X;X;X;X;X;X;X;X	XXXXXPPPPPPPPPPPPPPXXXXXXXXXXXX	AFVEFLTDEIK(1)EEK	11	2	-1.8778		835;836;837;838;839;840	840	38736	65871	92816	57540	71159	72374
O35658	91	O35658	O35658	sp|O35658|C1QBP_MOUSE Complement component 1 Q subcomponent-binding protein, mitochondrial OS=Mus musculus OX=10090 GN=C1qbp PE=1 SV=1	0.999983	6.74512e-08	130.46	1	K	DKAFVEFLTDEIKEEKKIQKHKSLPKMSGDW	X;X;X;X;X;X;X;X;X;X;X;X;X;X;X;Acetyl (K);X;X;X;X;X;X;X;X;X;X;X;X;X;X;X	XXPPPPPPPPPPPPPPPXXXXXXXXXXXXXX	AFVEFLTDEIKEEK(1)K	14	2	1.7183		844;845;846;847;848	847	0	39297	38021	22310	28993	20192
O35660	50	O35660	O35660	sp|O35660|GSTM6_MOUSE Glutathione S-transferase Mu 6 OS=Mus musculus OX=10090 GN=Gstm6 PE=1 SV=4	1	0.00476079	61.452	1	K	MGDAPDYDRSQWLNDKFKLDLDFPNLPYLID	X;X;X;X;X;X;X;X;X;X;X;X;X;X;X;Acetyl (K);X;X;X;X;X;X;X;X;X;X;X;X;X;X;X	XXXXXXXXXPPPPPPPPPXXXXXXXXXXXXX	SQWLNDK(1)FK	7	2	1.2614		26846;26847;26848	26848	257780	0	0	277870	0	298100
O35855	230	O35855	O35855	sp|O35855|BCAT2_MOUSE Branched-chain-amino-acid aminotransferase, mitochondrial OS=Mus musculus OX=10090 GN=Bcat2 PE=1 SV=2	1	8.46739e-21	85.34	1	K	DPSFVRAWIGGVGDCKLGGNYGPTVAVQREA	X;X;X;X;X;X;X;X;X;X;X;X;X;X;X;Acetyl (K);X;X;X;X;X;X;X;X;X;X;X;X;X;X;X	XXXXXXPPPPPPPPPPPPPPPPPPPPPPPXX	AWIGGVGDCK(1)LGGNYGPTVAVQR	10	2	-2.0026		2884;2885;2886;2887;2888;2889	2889	26979	70969	54707	47677	65216	29544
O35855	322	O35855	O35855	sp|O35855|BCAT2_MOUSE Branched-chain-amino-acid aminotransferase, mitochondrial OS=Mus musculus OX=10090 GN=Bcat2 PE=1 SV=2	0.999999	0.000453586	56.04	1	K	RTWGEFRVAERKVTMKELKRALEEGRVREVF	X;X;X;X;X;X;X;X;X;X;X;X;X;X;X;Acetyl (K);X;X;X;X;X;X;X;X;X;X;X;X;X;X;X	XXXXXXXXXXXPPPPPPPPXXXXXXXXXXXX	KVTMK(1)ELK	5	2	-0.31882		15263;15264;15265;15266	15265	241760	0	0	205320	255930	239860
O35857	415	O35857	O35857	sp|O35857|TIM44_MOUSE Mitochondrial import inner membrane translocase subunit TIM44 OS=Mus musculus OX=10090 GN=Timm44 PE=1 SV=2	1	0.00016993	89.188	1	K	VIKNSKGEVYDGDPDKVQRMLYVWALCRDQE	X;X;X;X;X;X;X;X;X;X;X;X;X;X;X;Acetyl (K);X;X;X;X;X;X;X;X;X;X;X;X;X;X;X	XXXXXXPPPPPPPPPPPPPXXXXXXXXXXXX	GEVYDGDPDK(1)VQR	10	2	-1.0242		7842;7843;7844;7845;7846;7847	7847	12539	11471	11788	12894	12974	7983.4
O54724	111	O54724	O54724	sp|O54724|CAVN1_MOUSE Caveolae-associated protein 1 OS=Mus musculus OX=10090 GN=Cavin1 PE=1 SV=1	1	3.53458e-07	120.36	1	K	SKLGKAHATTSNTVSKLLEKVRKVSVNVKTV	X;X;X;X;X;X;X;X;X;X;X;X;X;X;X;Acetyl (K);X;X;X;X;X;X;X;X;X;X;X;X;X;X;X	XXXXXPPPPPPPPPPPPPPPXXXXXXXXXXX	AHATTSNTVSK(1)LLEK	11	2	-0.37954		1072;1073;1074;1075	1075	29068	0	16182	14865	16363	0
O54724	163	O54724	O54724	sp|O54724|CAVN1_MOUSE Caveolae-associated protein 1 OS=Mus musculus OX=10090 GN=Cavin1 PE=1 SV=1	1	0.000236308	103.44	1	K	LRRRNFKVMIYQDEVKLPAKLSVSKSLKESE	X;X;X;X;X;X;X;X;X;X;X;X;X;X;X;Acetyl (K);X;X;X;X;X;X;X;X;X;X;X;X;X;X;X	XXXXXXXPPPPPPPPPPPPPXXXXXXXXXXX	VMIYQDEVK(1)LPAK	9	2	-2.9035		37144;37145	37145	19549	12467	0	0	0	0
O55028	184	O55028	O55028	sp|O55028|BCKD_MOUSE [3-methyl-2-oxobutanoate dehydrogenase [lipoamide]] kinase, mitochondrial OS=Mus musculus OX=10090 GN=Bckdk PE=1 SV=1	1	1.45777e-06	103.44	1	K	LAEGLRESRKHIQDEKLVRYFLDKTLTSRLG	X;X;X;X;X;X;X;X;X;X;X;X;X;X;X;Acetyl (K);X;X;X;X;X;X;X;Acetyl (K);X;X;X;X;X;X;X	XXXXXXXXXXPPPPPPPPPXXXXXXXXXXXX	HIQDEK(1)LVR	6	2	2.0289		10887;10888;10889;10890;10891;10892	10892	125950	121470	91077	112500	129460	174500
O55028	233	O55028	O55028	sp|O55028|BCKD_MOUSE [3-methyl-2-oxobutanoate dehydrogenase [lipoamide]] kinase, mitochondrial OS=Mus musculus OX=10090 GN=Bckdk PE=1 SV=1	1	0.00138126	71.338	1	K	VGIICTRLSPKKIIEKWVDFARRLCEHKYGN	X;X;X;X;X;X;X;X;X;X;X;X;X;X;X;Acetyl (K);X;X;X;X;X;X;X;X;X;X;X;Acetyl (K);X;X;X	XXXXXXXXXXXXPPPPPPPPPPXXXXXXXXX	IIEK(1)WVDFAR	4	2	-3.0639		13359;13360;13361;13362;13363;13364	13364	83585	105690	112240	94932	144700	134040
O55028	245	O55028	O55028	sp|O55028|BCKD_MOUSE [3-methyl-2-oxobutanoate dehydrogenase [lipoamide]] kinase, mitochondrial OS=Mus musculus OX=10090 GN=Bckdk PE=1 SV=1	1	0.000311282	124.43	1	K	IIEKWVDFARRLCEHKYGNAPRVRINGHVAA	X;X;X;Acetyl (K);X;X;X;X;X;X;X;X;X;X;X;Acetyl (K);X;X;X;X;X;X;X;X;X;X;X;X;X;X;X	XXXXXXXXXXXPPPPPPPPPPPXXXXXXXXX	LCEHK(1)YGNAPR	5	2	-1.8727		15610;15611;15612;15613;15614;15615;15616	15616	33762	30440	34794	18059	32965	32552
O55028	89	O55028	O55028	sp|O55028|BCKD_MOUSE [3-methyl-2-oxobutanoate dehydrogenase [lipoamide]] kinase, mitochondrial OS=Mus musculus OX=10090 GN=Bckdk PE=1 SV=1	1	0.00792298	37.469	1	K	MMLYSGRSQDGSHLLKSGRYLQQELPVRIAH	X;X;X;X;X;X;X;X;X;X;X;X;X;X;X;Acetyl (K);X;X;X;X;X;X;X;X;X;X;X;X;X;X;X	XXXXXXXPPPPPPPPPPPPXXXXXXXXXXXX	SQDGSHLLK(1)SGR	9	2	-3.5376		26728	26728	0	0	0	0	0	5056.5
O55028	192	O55028	O55028	sp|O55028|BCKD_MOUSE [3-methyl-2-oxobutanoate dehydrogenase [lipoamide]] kinase, mitochondrial OS=Mus musculus OX=10090 GN=Bckdk PE=1 SV=1	1	0.00029497	122.58	1	K	RKHIQDEKLVRYFLDKTLTSRLGIRMLATHH	X;X;X;X;X;X;X;Acetyl (K);X;X;X;X;X;X;X;Acetyl (K);X;X;X;X;X;X;X;X;X;X;X;X;X;X;X	XXXXXXXXXXXPPPPPPPPPPXXXXXXXXXX	YFLDK(1)TLTSR	5	2	-0.54157		39139;39140;39141;39142;39143;39144	39144	147660	154340	138940	115700	149900	179720
O55126	62	O55126	O55126	sp|O55126|NIPS2_MOUSE Protein NipSnap homolog 2 OS=Mus musculus OX=10090 GN=Nipsnap2 PE=1 SV=1	1	0.0119435	45.095	1	K	RKVDPRKDAHSNLLAKKETSSLYKLQFHNVK	X;X;X;X;X;X;X;X;X;X;X;X;X;X;X;Acetyl (K);X;X;X;X;X;X;X;Acetyl (K);X;X;X;X;X;X;Acetyl (K)	XXXXXXXPPPPPPPPPPXXXXXXXXXXXXXX	DAHSNLLAK(1)K	9	2	-2.5325		3344;3345;3346	3346	22248	0	11302	0	0	5169.3
O55126	70	O55126	O55126	sp|O55126|NIPS2_MOUSE Protein NipSnap homolog 2 OS=Mus musculus OX=10090 GN=Nipsnap2 PE=1 SV=1	1	2.48677e-15	111.66	1	K	AHSNLLAKKETSSLYKLQFHNVKPECLDAYN	X;X;X;X;X;X;X;Acetyl (K);X;X;X;X;X;X;X;Acetyl (K);X;X;X;X;X;X;Acetyl (K);X;X;X;X;X;X;X;X	XXXXXXXXXPPPPPPPPPPPPPPPPPPPPPP	ETSSLYK(1)LQFHNVKPECLDAYNK	7	3	-1.9845		5414;5415;5416	5415	221740	235050	0	0	0	30300
O55126	77	O55126	O55126	sp|O55126|NIPS2_MOUSE Protein NipSnap homolog 2 OS=Mus musculus OX=10090 GN=Nipsnap2 PE=1 SV=1	1	0.00371532	40.56	1	K	KKETSSLYKLQFHNVKPECLDAYNKICQEVL	Acetyl (K);X;X;X;X;X;X;X;X;X;X;X;X;X;X;Acetyl (K);X;X;X;X;X;X;X;X;X;X;X;X;X;X;X	XXXXXXXXXPPPPPPPPPPPPPPPPXXXXXX	LQFHNVK(1)PECLDAYNK	7	2	-1.0266		18279	18279	0	0	6301.4	0	0	0
O55126	86	O55126	O55126	sp|O55126|NIPS2_MOUSE Protein NipSnap homolog 2 OS=Mus musculus OX=10090 GN=Nipsnap2 PE=1 SV=1	0.988848	2.1668e-09	39.451	1	K	LQFHNVKPECLDAYNKICQEVLPKIHEGKQY	X;X;X;X;X;X;X;X;X;X;X;X;X;X;X;Acetyl (K);X;X;X;X;X;X;X;X;X;X;X;X;X;X;X	PPPPPPPPPPPPPPPPPPPPPPPPXXXXXXX	LQFHNVK(0.011)PECLDAYNK(0.989)ICQEVLPK	16	3	-2.0463		18280	18280	0	37236	0	0	0	0
O55126	276	O55126	O55126	sp|O55126|NIPS2_MOUSE Protein NipSnap homolog 2 OS=Mus musculus OX=10090 GN=Nipsnap2 PE=1 SV=1	1	0.000126528	103.81	1	K	VPLIQEMESRIMIPLKTSPLQ__________	X;X;X;X;X;X;X;X;X;X;X;Oxidation (M);X;X;X;Acetyl (K);X;X;X;X;X;X;X;X;X;X;X;X;X;X;X	XXXXXXXXXXPPPPPPPPPPPXXXXXXXXXX	IMIPLK(1)TSPLQ	6	2	-1.7898		13816;13817;13818;13819;13820;13821;13822	13822	159320	220210	267380	182680	248980	233430
O55126	138	O55126	O55126	sp|O55126|NIPS2_MOUSE Protein NipSnap homolog 2 OS=Mus musculus OX=10090 GN=Nipsnap2 PE=1 SV=1	1	5.90943e-14	136.63	1	K	WRYEGGYPALTEVMNKLKENQEFVNFRKARS	X;X;X;X;X;X;X;X;X;X;X;X;X;Oxidation (M);X;Acetyl (K);X;X;X;X;X;X;X;X;X;X;X;X;X;X;X	XXPPPPPPPPPPPPPPPPXXXXXXXXXXXXX	YEGGYPALTEVMNK(1)LK	14	2	-2.3528		39028;39029;39030;39031;39032;39033;39034;39035;39036;39037;39038;39039;39040;39041;39042;39043;39044;39045;39046	39046	104620	208460	326550	237450	275260	250760
O55137;Q8BWN8;Q9QYR7;Q6Q2Z6;Q9QYR9	42;42;53;42;83	O55137;Q9QYR9	Q9QYR9	sp|O55137|ACOT1_MOUSE Acyl-coenzyme A thioesterase 1 OS=Mus musculus OX=10090 GN=Acot1 PE=1 SV=1;sp|Q8BWN8|ACOT4_MOUSE Peroxisomal succinyl-coenzyme A thioesterase OS=Mus musculus OX=10090 GN=Acot4 PE=1 SV=1;sp|Q9QYR7|ACOT3_MOUSE Acyl-coenzyme A thioestera	1	5.80542e-05	95.654	1	K	APEQPVTLRSALRDEKGALFRAHARYRADAG;APEQPVTLRSVLRDEKGALFRAHARYRADSH	X;X;X;X;X;X;X;X;X;X;X;X;X;X;X;Acetyl (K);X;X;X;X;X;X;X;X;X;X;X;X;X;X;X	XXXXXXXXXXXXXPPPPPPPPXXXXXXXXXX	DEK(1)GALFR	3	2	1.078		3473;3474;3475;3476;3477;3478	3478	1090100	1102600	1362600	504270	669790	514740
O55137;Q9QYR9	338;379	O55137;Q9QYR9	Q9QYR9	sp|O55137|ACOT1_MOUSE Acyl-coenzyme A thioesterase 1 OS=Mus musculus OX=10090 GN=Acot1 PE=1 SV=1;sp|Q9QYR9|ACOT2_MOUSE Acyl-coenzyme A thioesterase 2, mitochondrial OS=Mus musculus OX=10090 GN=Acot2 PE=1 SV=2	1	0.000324493	128.56	1	K	DDHNWKSEFYADEISKRLQAHGKEKPQIICY	X;X;X;X;X;X;X;X;X;X;X;X;X;X;X;Acetyl (K);X;X;X;X;X;X;X;X;X;X;X;X;X;X;X	XXXXXXPPPPPPPPPPPXXXXXXXXXXXXXX	SEFYADEISK(1)R	10	2	0.39185		24849;24850;24851;24852;24853;24854	24854	65273	55706	50214	36889	47938	42656
O55137;Q9QYR9	222;263	O55137;Q9QYR9	Q9QYR9	sp|O55137|ACOT1_MOUSE Acyl-coenzyme A thioesterase 1 OS=Mus musculus OX=10090 GN=Acot1 PE=1 SV=1;sp|Q9QYR9|ACOT2_MOUSE Acyl-coenzyme A thioesterase 2, mitochondrial OS=Mus musculus OX=10090 GN=Acot2 PE=1 SV=2	1	5.03493e-13	80.604	1	K	YFEEAVNYLRSHPEVKGPGIGLLGISKGGEL	X;X;X;X;X;X;X;X;X;X;X;X;X;X;X;Acetyl (K);X;X;X;X;X;X;X;X;X;X;X;X;X;X;X	XXXXXXXXXXPPPPPPPPPPPPPPPPPXXXX	SHPEVK(1)GPGIGLLGISK	6	2	-2.0961		25618;25619;25620;25621;25622;25623;25624;25625;25626;25627;25628;25629	25629	70402	92311	70971	74051	68981	78605
O55143	571	O55143	O55143	sp|O55143|AT2A2_MOUSE Sarcoplasmic/endoplasmic reticulum calcium ATPase 2 OS=Mus musculus OX=10090 GN=Atp2a2 PE=1 SV=2	1	1.24931e-09	156.08	1	K	DTLRCLALATHDNPLKREEMHLEDSANFIKY	X;X;X;X;X;X;X;X;X;X;X;X;X;X;X;Acetyl (K);X;X;X;Oxidation (M);X;X;X;X;X;X;X;X;X;X;X	XXXXPPPPPPPPPPPPPXXXXXXXXXXXXXX	CLALATHDNPLK(1)R	12	2	0.066653		3147;3148;3149;3150;3151;3152	3152	189370	138650	188080	81765	115960	90549
O55143	611	O55143	O55143	sp|O55143|AT2A2_MOUSE Sarcoplasmic/endoplasmic reticulum calcium ATPase 2 OS=Mus musculus OX=10090 GN=Atp2a2 PE=1 SV=2	1	0.00529015	46.646	1	K	VGMLDPPRIEVASSVKLCRQAGIRVIMITGD	X;X;X;X;X;X;X;X;X;X;X;X;X;X;X;Acetyl (K);X;X;X;X;X;X;X;X;X;X;X;X;X;X;X	XXXXXXXXPPPPPPPPPPPXXXXXXXXXXXX	IEVASSVK(1)LCR	8	2	0.36325		12854;12855;12856;12857;12858;12859	12859	84055	56986	85121	26314	43884	29651
O55143	650	O55143	O55143	sp|O55143|AT2A2_MOUSE Sarcoplasmic/endoplasmic reticulum calcium ATPase 2 OS=Mus musculus OX=10090 GN=Atp2a2 PE=1 SV=2	1	8.9433e-07	67.241	1	K	CRRIGIFGQDEDVTSKAFTGREFDELSPSAQ	X;X;X;X;X;X;X;X;X;X;X;X;X;X;X;Acetyl (K);X;X;X;X;X;X;X;X;X;X;X;X;X;X;X	XXXPPPPPPPPPPPPPPPPPPXXXXXXXXXX	IGIFGQDEDVTSK(1)AFTGR	13	2	0.79418		13083;13084;13085	13085	7901.1	17715	0	0	11154	0
O55143	169	O55143	O55143	sp|O55143|AT2A2_MOUSE Sarcoplasmic/endoplasmic reticulum calcium ATPase 2 OS=Mus musculus OX=10090 GN=Atp2a2 PE=1 SV=2	1	0.00024404	59.565	1	K	AVGDKVPADIRLTSIKSTTLRVDQSILTGES	X;X;X;X;X;X;X;X;X;X;X;X;X;X;X;Acetyl (K);X;X;X;X;X;X;X;X;X;X;X;X;X;X;X	XXXXXXXXXXXPPPPPPPPPPXXXXXXXXXX	LTSIK(1)STTLR	5	2	-1.0733		18901;18902;18903;18904;18905;18906	18906	135830	112440	90391	34165	71912	59426
O55143	460	O55143	O55143	sp|O55143|AT2A2_MOUSE Sarcoplasmic/endoplasmic reticulum calcium ATPase 2 OS=Mus musculus OX=10090 GN=Atp2a2 PE=1 SV=2	1	3.71822e-22	194.67	1	K	LTCLVEKMNVFDTELKGLSKIERANACNSVI	X;X;X;X;X;X;X;Oxidation (M);X;X;X;X;X;X;X;Acetyl (K);X;X;X;X;X;X;X;X;X;X;X;X;X;X;X	XXXXXXXPPPPPPPPPPPPPXXXXXXXXXXX	MNVFDTELK(1)GLSK	9	2	0.36954		20259;20260;20261;20262;20263;20264;20265	20265	251170	247950	217030	155950	221880	170230
O55143;Q8R429	120;120	O55143	O55143	sp|O55143|AT2A2_MOUSE Sarcoplasmic/endoplasmic reticulum calcium ATPase 2 OS=Mus musculus OX=10090 GN=Atp2a2 PE=1 SV=2;sp|Q8R429|AT2A1_MOUSE Sarcoplasmic/endoplasmic reticulum calcium ATPase 1 OS=Mus musculus OX=10090 GN=Atp2a1 PE=1 SV=1	1	9.36406e-17	115.18	1	K	GVWQERNAENAIEALKEYEPEMGKVYRQDRK	X;X;X;X;X;X;X;X;X;X;X;X;X;X;X;Acetyl (K);X;X;X;X;X;X;X;X;X;X;X;X;X;X;X	XXXXXXPPPPPPPPPPPPPPPPPPXXXXXXX	NAENAIEALK(1)EYEPEMGK	10	2	-0.694		20686	20686	0	5050.7	0	0	0	0
O55143	533	O55143	O55143	sp|O55143|AT2A2_MOUSE Sarcoplasmic/endoplasmic reticulum calcium ATPase 2 OS=Mus musculus OX=10090 GN=Atp2a2 PE=1 SV=2	1	0.00584589	60.327	1	K	EGVIDRCTHIRVGSTKVPMTPGVKQKIMSVI	X;X;X;X;X;X;X;X;X;X;X;X;X;X;X;Acetyl (K);X;X;X;X;X;X;X;X;X;X;X;X;X;X;X	XXXXXXXXXXXPPPPPPPPPPPPPXXXXXXX	VGSTK(1)VPMTPGVK	5	2	0.5206		36248;36249;36250;36251	36251	127170	0	56717	82358	90449	0
O55222	426	O55222	O55222	sp|O55222|ILK_MOUSE Integrin-linked protein kinase OS=Mus musculus OX=10090 GN=Ilk PE=1 SV=2	1	0.00033952	137.21	1	K	PTIPPGISPHVCKLMKICMNEDPAKRPKFDM	X;X;X;X;X;X;X;X;X;X;X;X;X;X;X;Acetyl (K);X;X;X;X;X;X;X;X;X;X;X;X;X;X;X	XXXXXXXXXXXXXPPPPPPPPPPPPXXXXXX	LMK(1)ICMNEDPAK	3	2	-1.6966		17939;17940;17941;17942;17943	17943	22272	56653	79956	41472	54091	0
O70250	106	O70250	O70250	sp|O70250|PGAM2_MOUSE Phosphoglycerate mutase 2 OS=Mus musculus OX=10090 GN=Pgam2 PE=1 SV=3	1	0.000394952	71.68	1	K	HYGGLTGLNKAETAAKHGEEQVKIWRRSFDT	X;X;X;X;X;X;X;X;X;X;X;X;X;X;X;Acetyl (K);X;X;X;X;X;X;Acetyl (K);X;X;X;X;X;X;X;X	XXXXXXXXXXPPPPPPPPPPPPPXXXXXXXX	AETAAK(1)HGEEQVK	6	2	-1.0339		657;658	658	3364.7	3777.5	0	0	0	0
O70250	113	O70250	O70250	sp|O70250|PGAM2_MOUSE Phosphoglycerate mutase 2 OS=Mus musculus OX=10090 GN=Pgam2 PE=1 SV=3	1	1.11346e-07	129.18	1	K	LNKAETAAKHGEEQVKIWRRSFDTPPPPMDE	X;X;Acetyl (K);X;X;X;X;X;X;X;X;X;X;X;X;Acetyl (K);X;X;X;X;X;X;X;X;X;X;X;X;Oxidation (M);X;X	XXXXXXXXXPPPPPPPPPPXXXXXXXXXXXX	HGEEQVK(1)IWR	7	2	-0.89302		10494;10495;10496;10497;10498;10499	10499	187660	135030	73797	98093	105780	101940
O70250	251	O70250	O70250	sp|O70250|PGAM2_MOUSE Phosphoglycerate mutase 2 OS=Mus musculus OX=10090 GN=Pgam2 PE=1 SV=3	1	0.000542574	64.406	1	K	EETVRKAMEAVAAQGKAK_____________	X;X;X;X;X;X;X;X;X;X;X;X;X;X;X;Acetyl (K);X;X;X;X;X;X;X;X;X;X;X;X;X;X;X	XXXXXXPPPPPPPPPPPPXXXXXXXXXXXXX	AMEAVAAQGK(1)AK	10	2	-3.9318		1810	1810	0	5497	0	0	0	0
O70250	138	O70250	O70250	sp|O70250|PGAM2_MOUSE Phosphoglycerate mutase 2 OS=Mus musculus OX=10090 GN=Pgam2 PE=1 SV=3	1	0.00276074	86.216	1	K	PPPMDEKHNYYTSISKDRRYAGLKPEELPTC	X;X;X;Oxidation (M);X;X;X;X;X;X;X;X;X;X;X;Acetyl (K);X;X;X;X;X;X;X;X;X;X;X;X;X;X;X	XXXXXXXPPPPPPPPPPPXXXXXXXXXXXXX	HNYYTSISK(1)DR	9	2	-2.7234		11572;11573	11573	33253	0	0	0	0	40388
O70250;Q9DBJ1	100;100	O70250;Q9DBJ1	O70250	sp|O70250|PGAM2_MOUSE Phosphoglycerate mutase 2 OS=Mus musculus OX=10090 GN=Pgam2 PE=1 SV=3;sp|Q9DBJ1|PGAM1_MOUSE Phosphoglycerate mutase 1 OS=Mus musculus OX=10090 GN=Pgam1 PE=1 SV=3	1	1.38829e-25	149.94	1	K	WRLNERHYGGLTGLNKAETAAKHGEAQVKIW;WRLNERHYGGLTGLNKAETAAKHGEEQVKIW	X;X;X;X;X;X;X;X;X;X;X;X;X;X;X;Acetyl (K);X;X;X;X;X;Acetyl (K);X;X;X;X;X;X;Acetyl (K);X;X	XXXXXXPPPPPPPPPPPPPPPPXXXXXXXXX	HYGGLTGLNK(1)AETAAK	10	2	-0.75166		12367;12368;12369;12370;12371;12372	12372	143400	223490	151350	179390	152960	154380
O70250	129	O70250	O70250	sp|O70250|PGAM2_MOUSE Phosphoglycerate mutase 2 OS=Mus musculus OX=10090 GN=Pgam2 PE=1 SV=3	1	2.14995e-09	70.18	1	K	IWRRSFDTPPPPMDEKHNYYTSISKDRRYAG	X;X;X;X;X;X;X;X;X;X;X;X;Oxidation (M);X;X;Acetyl (K);X;X;X;X;X;X;X;X;Acetyl (K);X;X;X;X;X;X	XXXXPPPPPPPPPPPPPPPPPPPPPXXXXXX	SFDTPPPPMDEK(1)HNYYTSISK	12	3	-0.40961		25051;25052;25053;25054;25055;25056;25057;25058	25058	436680	382790	528190	245400	267350	240500
O70251	78	O70251	O70251	sp|O70251|EF1B_MOUSE Elongation factor 1-beta OS=Mus musculus OX=10090 GN=Eef1b PE=1 SV=5	1	0.00123789	67.252	1	K	EKEKASLPGVKKSLGKYGPSSVEDTTGSGAA	X;X;X;X;X;X;X;X;X;X;X;X;X;X;X;Acetyl (K);X;X;X;X;X;X;X;X;X;X;X;X;X;X;X	XXXXXXXXXXXXPPPPPPPPPPPPPPPPPPP	SLGK(1)YGPSSVEDTTGSGAADAK	4	2	0.46513		26023	26023	6232.4	0	0	0	0	0
O70468	1167	O70468	O70468	sp|O70468|MYPC3_MOUSE Myosin-binding protein C, cardiac-type OS=Mus musculus OX=10090 GN=Mybpc3 PE=1 SV=1	1	0.000897742	98.352	1	K	EPVFIPRPGITYEPPKYKALDFSEAPSFTQP	X;X;X;X;X;X;X;X;X;X;X;X;X;X;X;Acetyl (K);X;X;X;X;X;X;X;X;X;X;X;X;X;X;X	XXXXXXXPPPPPPPPPPPXXXXXXXXXXXXX	PGITYEPPK(1)YK	9	2	0.01984		22167	22167	79749	0	0	0	0	0
O70468	1207	O70468	O70468	sp|O70468|MYPC3_MOUSE Myosin-binding protein C, cardiac-type OS=Mus musculus OX=10090 GN=Mybpc3 PE=1 SV=1	1	0.0107942	43.228	1	K	YNAILCCAVRGSPKPKISWFKNGLDLGEDAR	X;X;X;X;X;X;X;X;X;X;X;X;X;X;X;Acetyl (K);X;X;X;X;X;X;X;X;X;X;X;X;X;X;X	XXXXXXXXXXXXXXPPPPPPPXXXXXXXXXX	PK(1)ISWFK	2	2	-2.2285		22355;22356	22356	24930	20901	0	0	0	0
O70468	539	O70468	O70468	sp|O70468|MYPC3_MOUSE Myosin-binding protein C, cardiac-type OS=Mus musculus OX=10090 GN=Mybpc3 PE=1 SV=1	1	1.17423e-18	158.93	1	K	RTSGGQSLAELIVQEKKLEVYQSIADLAVGA	X;X;X;X;X;X;X;X;X;X;X;X;X;X;X;Acetyl (K);X;X;X;X;X;X;X;X;X;X;X;X;X;X;X	XPPPPPPPPPPPPPPPPXXXXXXXXXXXXXX	TSGGQSLAELIVQEK(1)K	15	2	-2.8499		33342;33343;33344;33345;33346;33347	33347	132180	82034	63777	18728	29816	20866
O70468	183	O70468	O70468	sp|O70468|MYPC3_MOUSE Myosin-binding protein C, cardiac-type OS=Mus musculus OX=10090 GN=Mybpc3 PE=1 SV=1	1	0.000103515	129.67	1	K	GSIVFSARVAGASLLKPPVVKWFKGKWVDLS	X;X;X;X;X;X;X;X;X;X;X;X;X;X;X;Acetyl (K);X;X;X;X;X;X;X;X;X;X;X;X;X;X;X	XXXXXXXXPPPPPPPPPPPPPXXXXXXXXXX	VAGASLLK(1)PPVVK	8	2	-1.2729		35251;35252;35253;35254;35255;35256;35257	35257	325160	160400	186210	73192	142600	122350
O70468	1146	O70468	O70468	sp|O70468|MYPC3_MOUSE Myosin-binding protein C, cardiac-type OS=Mus musculus OX=10090 GN=Mybpc3 PE=1 SV=1	1	4.13545e-16	90.357	1	K	YYFRVFSHNMVGSSDKAAATKEPVFIPRPGI	X;X;X;X;X;X;X;X;X;X;X;X;X;X;X;Acetyl (K);X;X;X;X;X;X;X;X;X;X;X;X;X;X;X	XXXXPPPPPPPPPPPPPPPPPXXXXXXXXXX	VFSHNMVGSSDK(1)AAATK	12	2	-2.4428		36080;36081;36082	36082	10275	7471.7	7633.3	0	0	0
O70468	62	O70468	O70468	sp|O70468|MYPC3_MOUSE Myosin-binding protein C, cardiac-type OS=Mus musculus OX=10090 GN=Mybpc3 PE=1 SV=1	1	0.00314898	77.229	1	K	SDITANDKYGLAAEGKRHTLTVRDASPDDQG	X;X;X;X;X;X;X;X;X;X;X;X;X;X;X;Acetyl (K);X;X;X;X;X;X;X;X;X;X;X;X;X;X;X	XXXXXXXXPPPPPPPPPXXXXXXXXXXXXXX	YGLAAEGK(1)R	8	2	1.2186		39245	39245	71836	0	0	0	0	0
O70571	374	O70571	O70571	sp|O70571|PDK4_MOUSE [Pyruvate dehydrogenase (acetyl-transferring)] kinase isozyme 4, mitochondrial OS=Mus musculus OX=10090 GN=Pdk4 PE=1 SV=1	1	0.0188866	66.823	1	K	DAIIYLKALSSESVEKLPVFNKSAFKHYQMS	X;X;X;X;X;X;X;X;X;X;X;X;X;X;X;Acetyl (K);X;X;X;X;X;X;X;X;X;X;X;X;X;X;X	XXXXXXXPPPPPPPPPPPPPPPXXXXXXXXX	ALSSESVEK(1)LPVFNK	9	2	-4.0094		1722	1722	12254	0	0	0	0	0
O88342	256	O88342	O88342	sp|O88342|WDR1_MOUSE WD repeat-containing protein 1 OS=Mus musculus OX=10090 GN=Wdr1 PE=1 SV=3	1	0.000145676	46.744	1	K	SWSPDSTHLLSASGDKTSKIWDVNVNSVVST	X;X;X;X;X;X;X;X;X;X;X;X;X;X;X;Acetyl (K);X;X;X;X;X;X;X;X;X;X;X;X;X;X;X	PPPPPPPPPPPPPPPPPPPXXXXXXXXXXXX	AHDGGIYAISWSPDSTHLLSASGDK(1)TSK	25	3	1.5498		1085	1085	0	0	29779	0	0	0
O88441	108	O88441	O88441	sp|O88441|MTX2_MOUSE Metaxin-2 OS=Mus musculus OX=10090 GN=Mtx2 PE=1 SV=1	1	0.00112333	79.867	1	K	KAKGHSLSDGLDEVQKAEMKAYMELVNNMLL	X;X;X;X;X;X;X;X;X;X;X;X;X;X;X;Acetyl (K);X;X;X;X;X;X;X;X;X;X;X;X;X;X;X	XXXPPPPPPPPPPPPPPPPPXXXXXXXXXXX	GHSLSDGLDEVQK(1)AEMK	13	2	-1.7542		8230	8230	0	7370.4	0	0	0	0
O88456	180	O88456	O88456	sp|O88456|CPNS1_MOUSE Calpain small subunit 1 OS=Mus musculus OX=10090 GN=Capns1 PE=1 SV=1	1	0.0305597	44.947	1	K	FKYLWNNIKKWQAIYKRFDTDRSGTIGSHEL	X;X;X;X;X;X;X;X;X;X;X;X;X;X;X;Acetyl (K);X;X;X;X;X;X;X;X;X;X;X;X;X;X;X	XXXXXXXXXXPPPPPPPXXXXXXXXXXXXXX	WQAIYK(1)R	6	2	-0.77508		38654	38654	0	0	0	0	8809.9	0
O88569	112	O88569	O88569	sp|O88569|ROA2_MOUSE Heterogeneous nuclear ribonucleoproteins A2/B1 OS=Mus musculus OX=10090 GN=Hnrnpa2b1 PE=1 SV=2	1	1.53138e-05	109.18	1	K	VAREESGKPGAHVTVKKLFVGGIKEDTEEHH	X;X;X;X;X;X;X;X;X;X;X;X;X;X;X;Acetyl (K);X;X;X;X;X;X;X;X;X;X;X;X;X;X;X	XXXPPPPPPPPPPPPPPXXXXXXXXXXXXXX	EESGKPGAHVTVK(1)K	13	2	-1.5879		4611;4612;4613;4614;4615;4616	4616	19083	15982	26661	17631	15670	15929
O88844	81	O88844	O88844	sp|O88844|IDHC_MOUSE Isocitrate dehydrogenase [NADP] cytoplasmic OS=Mus musculus OX=10090 GN=Idh1 PE=1 SV=2	1	4.69759e-12	106.8	1	K	KYNVGVKCATITPDEKRVEEFKLKQMWKSPN	X;X;X;X;X;X;X;X;X;X;X;X;X;X;X;Acetyl (K);X;X;X;X;X;X;X;X;X;X;X;X;X;X;X	XXXXXXXPPPPPPPPPPXXXXXXXXXXXXXX	CATITPDEK(1)R	9	2	-0.29906		3017;3018;3019;3020;3021;3022	3022	58816	59190	82676	62627	62806	44612
O88844	243	O88844	O88844	sp|O88844|IDHC_MOUSE Isocitrate dehydrogenase [NADP] cytoplasmic OS=Mus musculus OX=10090 GN=Idh1 PE=1 SV=2	1	0.000127815	95.321	1	K	QEIYDKKYKSQFEAQKICYEHRLIDDMVAQA	X;X;X;X;X;X;X;X;X;X;X;X;X;X;X;Acetyl (K);X;X;X;X;X;X;X;X;X;X;X;X;X;X;X	XXXXXXXXXPPPPPPPPPPPPPXXXXXXXXX	SQFEAQK(1)ICYEHR	7	2	-1.6825		26737	26737	0	0	0	0	0	11101
O88986	184	O88986	O88986	sp|O88986|KBL_MOUSE 2-amino-3-ketobutyrate coenzyme A ligase, mitochondrial OS=Mus musculus OX=10090 GN=Gcat PE=1 SV=2	1	0.00374744	84.665	1	K	HKYRYRHLDMADLEAKLKEAQKHRLRLVATD	X;X;X;X;X;X;X;X;X;X;X;X;X;X;X;Acetyl (K);X;X;X;X;X;X;X;X;X;X;X;X;X;X;X	XXXXXXPPPPPPPPPPPPXXXXXXXXXXXXX	HLDMADLEAK(1)LK	10	2	-0.37207		11051;11052;11053;11054;11055;11056	11056	85521	97764	99486	118960	137990	137310
O89106	135	O89106	O89106	sp|O89106|FHIT_MOUSE Bis(5'-adenosyl)-triphosphatase OS=Mus musculus OX=10090 GN=Fhit PE=1 SV=3	1	2.28907e-06	109.25	1	K	HDREEEDSPAFWRSEKEMAAEAEALRVYFQA	X;X;X;X;X;X;X;X;X;X;X;X;X;X;X;Acetyl (K);X;X;X;X;X;X;X;X;X;X;X;X;X;X;X	XXXXXXXXXXXXXPPPPPPPPPPPPPXXXXX	SEK(1)EMAAEAEALR	3	2	1.6002		24926;24927;24928;24929;24930;24931	24931	22661	16028	21911	14069	16385	16158
O89110	226	O89110	O89110	sp|O89110|CASP8_MOUSE Caspase-8 OS=Mus musculus OX=10090 GN=Casp8 PE=1 SV=1	1	0.0136529	41.446	1	K	CDSPREQDSESRTSDKVYQMKNKPRGYCLII	X;X;X;X;X;X;X;X;X;X;X;X;X;X;X;Acetyl (K);X;X;X;X;X;X;X;X;X;X;X;X;X;X;X	XXXXXXXXXXXXPPPPPPPPPXXXXXXXXXX	TSDK(1)VYQMK	4	2	1.6217		33224	33224	0	0	0	0	0	10891
O89112	128	O89112	O89112	sp|O89112|LANC1_MOUSE Glutathione S-transferase LANCL1 OS=Mus musculus OX=10090 GN=Lancl1 PE=1 SV=1	1	1.83796e-06	137.06	1	K	PLAVAAVLYHKMNSEKQAEECITRLIHLNKI	X;X;X;X;X;X;X;X;X;X;X;X;X;X;X;Acetyl (K);X;X;X;X;X;X;X;X;X;X;X;X;X;X;X	XXXXXXXXXXXPPPPPPPPPPPPPXXXXXXX	MNSEK(1)QAEECITR	5	2	-0.8216		20248;20249;20250;20251;20252	20252	7311.4	8060.3	8067.7	0	2783.9	4551.3
P00416	77	P00416	P00416	sp|P00416|COX3_MOUSE Cytochrome c oxidase subunit 3 OS=Mus musculus OX=10090 GN=mt-Co3 PE=1 SV=2	1	2.96749e-10	109.59	1	K	IREGTYQGHHTPIVQKGLRYGMILFIVSEVF	X;X;X;X;X;X;X;X;X;X;X;X;X;X;X;Acetyl (K);X;X;X;X;X;X;X;X;X;X;X;X;X;X;X	XXPPPPPPPPPPPPPPPPPXXXXXXXXXXXX	EGTYQGHHTPIVQK(1)GLR	14	3	-0.65938		4771;4772;4773;4774;4775;4776	4776	33820	45516	17338	28314	48724	38748
P00416	224	P00416	P00416	sp|P00416|COX3_MOUSE Cytochrome c oxidase subunit 3 OS=Mus musculus OX=10090 GN=mt-Co3 PE=1 SV=2	1	5.59698e-10	107.45	1	K	IIGSTFLIVCLLRQLKFHFTSKHHFGFEAAA	X;X;X;X;X;X;X;X;X;X;X;X;X;X;X;Acetyl (K);X;X;X;X;X;X;X;X;X;X;X;X;X;X;X	XXXXXXXXXXXXXPPPPPPPPPXXXXXXXXX	QLK(1)FHFTSK	3	2	-1.3943		23704;23705;23706;23707;23708	23708	156340	0	203430	27196	129210	69995
P00848	55	P00848	P00848	sp|P00848|ATP6_MOUSE ATP synthase subunit a OS=Mus musculus OX=10090 GN=Mtatp6 PE=1 SV=1	1	1.04632e-09	159.09	1	K	NRLHSFQHWLVKLIIKQMMLIHTPKGRTWTL	X;X;X;X;X;X;X;X;X;X;X;X;X;X;X;Acetyl (K);X;Oxidation (M);Oxidation (M);X;X;X;X;X;X;X;X;X;X;X;X	XXXXXXXXXXXXPPPPPPPPPPPPPXXXXXX	LIIK(1)QMMLIHTPK	4	2	-1.5807		16884;16885;16886;16887;16888;16889;16890;16891	16891	27666	23942	0	13941	18505	15463
P00920	167	P00920	P00920	sp|P00920|CAH2_MOUSE Carbonic anhydrase 2 OS=Mus musculus OX=10090 GN=Ca2 PE=1 SV=4	1	9.75932e-05	103.11	1	K	ASQGLQKVLEALHSIKTKGKRAAFANFDPCS	X;X;X;X;X;X;X;X;X;X;X;X;X;X;X;Acetyl (K);X;X;X;X;X;X;X;X;X;X;X;X;X;X;X	XXXXXXXPPPPPPPPPPPXXXXXXXXXXXXX	VLEALHSIK(1)TK	9	2	0.21563		36771;36772;36773;36774	36774	14761	0	0	0	9976.5	8293
P01027	733	P01027	P01027	sp|P01027|CO3_MOUSE Complement C3 OS=Mus musculus OX=10090 GN=C3 PE=1 SV=3	1	0.0388324	46.752	1	K	ENCIKAFIDCCNHITKLREQHRRDHVLGLAR	X;X;X;X;X;X;X;X;X;X;X;X;X;X;X;Acetyl (K);X;X;X;X;X;X;X;X;X;X;X;X;X;X;X	XXXXXPPPPPPPPPPPPPXXXXXXXXXXXXX	AFIDCCNHITK(1)LR	11	2	0.67302		776	776	2357.6	0	0	0	0	0
P01867	321	P01867	P01867	sp|P01867|IGG2B_MOUSE Ig gamma-2B chain C region OS=Mus musculus OX=10090 GN=Igh-3 PE=1 SV=3	1	0.0271814	50.206	1	K	EKTDSFSCNVRHEGLKNYYLKKTISRSPGLD	X;X;X;X;X;X;X;X;X;X;X;X;X;X;X;Acetyl (K);X;X;X;X;X;X;X;X;X;X;X;X;X;X;X	XXXXXXXXXXXPPPPPPPPPPXXXXXXXXXX	HEGLK(1)NYYLK	5	2	0.63909		10109;10110	10110	11296	11250	0	0	0	0
P01942	17	P01942	P01942	sp|P01942|HBA_MOUSE Hemoglobin subunit alpha OS=Mus musculus OX=10090 GN=Hba PE=1 SV=2	1	2.72434e-25	38.652	1	K	VLSGEDKSNIKAAWGKIGGHGAEYGAEALER	X;X;X;X;X;X;Acetyl (K);X;X;X;X;X;X;X;X;Acetyl (K);X;X;X;X;X;X;X;X;X;X;X;X;X;X;X	XXXXXXXXXXXPPPPPPPPPPPPPPPPPPPP	AAWGK(1)IGGHGAEYGAEALER	5	3	-0.21815		333;334;335;336;337;338;339;340;341;342;343;344;345;346	346	1207000	485520	966330	331790	1626600	312720
P01942	140	P01942	P01942	sp|P01942|HBA_MOUSE Hemoglobin subunit alpha OS=Mus musculus OX=10090 GN=Hba PE=1 SV=2	1	8.79167e-23	204.32	1	K	SLDKFLASVSTVLTSKYR_____________	X;X;X;X;X;X;X;X;X;X;X;X;X;X;X;Acetyl (K);X;X;X;X;X;X;X;X;X;X;X;X;X;X;X	XXXXPPPPPPPPPPPPPPXXXXXXXXXXXXX	FLASVSTVLTSK(1)YR	12	2	-1.6238		6558;6559;6560;6561;6562;6563;6564;6565;6566;6567	6567	238040	259230	279720	188590	279710	223650
P01942	12	P01942	P01942	sp|P01942|HBA_MOUSE Hemoglobin subunit alpha OS=Mus musculus OX=10090 GN=Hba PE=1 SV=2	1	0.000193853	97.799	1	K	____MVLSGEDKSNIKAAWGKIGGHGAEYGA	X;X;X;X;X;X;X;X;X;X;X;X;X;X;X;Acetyl (K);X;X;X;X;Acetyl (K);X;X;X;X;X;X;X;X;X;X	XXXXXXXXXXXXPPPPPPPPPXXXXXXXXXX	SNIK(1)AAWGK	4	2	0.21104		26517;26518;26519;26520;26521;26522	26522	273560	148960	58514	56843	163670	69546
P01942	57	P01942	P01942	sp|P01942|HBA_MOUSE Hemoglobin subunit alpha OS=Mus musculus OX=10090 GN=Hba PE=1 SV=2	1	5.64396e-66	226	1	K	TYFPHFDVSHGSAQVKGHGKKVADALASAAG	X;X;X;X;X;X;X;X;X;X;X;X;X;X;X;Acetyl (K);X;X;X;X;X;X;X;X;X;X;X;X;X;X;X	PPPPPPPPPPPPPPPPPPPPXXXXXXXXXXX	TYFPHFDVSHGSAQVK(1)GHGK	16	3	0.11241		34869;34870;34871;34872;34873;34874	34874	368920	274840	177090	247000	265000	218420
P01942	8	P01942	P01942	sp|P01942|HBA_MOUSE Hemoglobin subunit alpha OS=Mus musculus OX=10090 GN=Hba PE=1 SV=2	1	3.27039e-10	121.03	1	K	________MVLSGEDKSNIKAAWGKIGGHGA	X;X;X;X;X;X;X;X;X;X;X;X;X;X;X;Acetyl (K);X;X;X;Acetyl (K);X;X;X;X;Acetyl (K);X;X;X;X;X;X	XXXXXXXXXPPPPPPPPPPPXXXXXXXXXXX	VLSGEDK(1)SNIK	7	2	0.17552		36978;36979;36980;36981;36982;36983	36983	2501800	1854400	1299700	1492600	1831000	1105600
P02088;P02089	96;96	P02088	P02088	sp|P02088|HBB1_MOUSE Hemoglobin subunit beta-1 OS=Mus musculus OX=10090 GN=Hbb-b1 PE=1 SV=2;sp|P02089|HBB2_MOUSE Hemoglobin subunit beta-2 OS=Mus musculus OX=10090 GN=Hbb-b2 PE=1 SV=2	1	3.09094e-73	215.47	1	K	SLKGTFASLSELHCDKLHVDPENFRLLGNMI	X;X;X;X;X;X;X;X;X;X;X;X;X;X;X;Acetyl (K);X;X;X;X;X;X;X;X;X;X;X;X;X;Oxidation (M);X	XXXPPPPPPPPPPPPPPPPPPPPPPXXXXXX	GTFASLSELHCDK(1)LHVDPENFR	13	3	-1.1234		9423;9424;9425;9426;9427;9428	9428	814040	638450	755790	352510	625670	401710
P03930	54	P03930	P03930	sp|P03930|ATP8_MOUSE ATP synthase protein 8 OS=Mus musculus OX=10090 GN=Mtatp8 PE=1 SV=1	1	3.05301e-12	148.02	1	K	PKSLTTMKVKTPWELKWTKIYLPHSLPQQ__	X;X;X;X;X;X;X;X;X;X;X;X;X;X;X;Acetyl (K);X;X;X;X;X;X;X;X;X;X;X;X;X;X;X	XXXXXXXXXXPPPPPPPPPXXXXXXXXXXXX	TPWELK(1)WTK	6	2	0.24974		32709;32710;32711;32712;32713;32714	32714	1362400	1138200	670060	973580	1401600	1359000
P04117	113	P04117	P04117	sp|P04117|FABP4_MOUSE Fatty acid-binding protein, adipocyte OS=Mus musculus OX=10090 GN=Fabp4 PE=1 SV=3	1	0.0299274	41.954	1	K	WDGKSTTIKRKRDGDKLVVECVMKGVTSTRV	X;X;X;X;X;X;X;X;X;X;X;X;X;X;X;Acetyl (K);X;X;X;X;X;X;X;Acetyl (K);X;X;X;X;X;X;X	XXXXXXXXXXXXPPPPPPPPPPPPXXXXXXX	DGDK(1)LVVECVMK	4	2	8.2568		3601	3601	0	0	41971	0	0	0
P04117	121	P04117	P04117	sp|P04117|FABP4_MOUSE Fatty acid-binding protein, adipocyte OS=Mus musculus OX=10090 GN=Fabp4 PE=1 SV=3	1	1.13205e-07	89.039	1	K	KRKRDGDKLVVECVMKGVTSTRVYERA____	X;X;X;X;X;X;X;X;X;X;X;X;X;X;X;Acetyl (K);X;X;X;X;X;X;X;X;X;X;X;X;X;X;X	XXXXXXXXPPPPPPPPPPPPPPXXXXXXXXX	LVVECVMK(1)GVTSTR	8	2	-1.8565		19222;19223;19224;19225;19226;19227;19228;19229	19229	154240	174850	228960	109790	125050	111090
P04117	59	P04117	P04117	sp|P04117|FABP4_MOUSE Fatty acid-binding protein, adipocyte OS=Mus musculus OX=10090 GN=Fabp4 PE=1 SV=3	1	6.70636e-41	219.11	1	K	SVNGDLVTIRSESTFKNTEISFKLGVEFDEI	X;X;X;X;X;X;X;X;X;X;X;X;X;X;X;Acetyl (K);X;X;X;X;X;X;X;X;X;X;X;X;X;X;X	XXXXXXXXXXPPPPPPPPPPPPPXXXXXXXX	SESTFK(1)NTEISFK	6	2	-1.6263		24970;24971;24972;24973;24974;24975	24975	353540	349390	413170	203490	251920	162960
P04247	97	P04247	P04247	sp|P04247|MYG_MOUSE Myoglobin OS=Mus musculus OX=10090 GN=Mb PE=1 SV=3	1	5.04889e-45	230.55	1	K	QHAAEIQPLAQSHATKHKIPVKYLEFISEII	X;X;X;X;X;X;X;X;X;X;X;X;X;X;X;Acetyl (K);X;X;X;X;X;X;X;X;X;X;X;X;X;X;X	PPPPPPPPPPPPPPPPPPXXXXXXXXXXXXX	GQHAAEIQPLAQSHATK(1)HK	17	3	-1.0593		9089;9090;9091;9092;9093;9094;9095;9096;15021;15022;15023;15024	9096	1223400	1030400	1016400	761740	887620	700770
P04247	78	P04247	P04247	sp|P04247|MYG_MOUSE Myoglobin OS=Mus musculus OX=10090 GN=Mb PE=1 SV=3	1	7.90512e-54	180.05	1	K	KKHGCTVLTALGTILKKKGQHAAEIQPLAQS	Acetyl (K);X;X;X;X;X;X;X;X;X;X;X;X;X;X;Acetyl (K);X;X;X;X;X;X;X;X;X;X;X;X;X;X;X	XXPPPPPPPPPPPPPPPXXXXXXXXXXXXXX	HGCTVLTALGTILK(1)K	14	2	-2.7303		10483;10484;10485;10486;10487;10488;10489;10490;10491;10492;10493	10493	233820	312950	187530	181430	222140	153920
P04247	64	P04247	P04247	sp|P04247|MYG_MOUSE Myoglobin OS=Mus musculus OX=10090 GN=Mb PE=1 SV=3	1	0.000176262	89.356	1	K	NLKSEEDMKGSEDLKKHGCTVLTALGTILKK	X;X;Acetyl (K);X;X;X;X;Oxidation (M);Acetyl (K);X;X;X;X;X;X;Acetyl (K);X;X;X;X;X;X;X;X;X;X;X;X;X;Acetyl (K);X	XXXXXXXXXXXXXXXPPPPPPPPPPPPPPPX	K(1)HGCTVLTALGTILK	1	2	-1.4645		15044	15044	0	13572	0	0	0	0
P04247	51	P04247	P04247	sp|P04247|MYG_MOUSE Myoglobin OS=Mus musculus OX=10090 GN=Mb PE=1 SV=3	1	0.000474037	120.18	1	K	THPETLDKFDKFKNLKSEEDMKGSEDLKKHG	X;X;X;X;X;X;X;Acetyl (K);X;X;Acetyl (K);X;X;X;X;Acetyl (K);X;X;X;X;Oxidation (M);Acetyl (K);X;X;X;X;X;Acetyl (K);Acetyl (K);X;X	XXXXXXXXXXXXXPPPPPPPPPXXXXXXXXX	NLK(1)SEEDMK	3	2	-2.3455		21239;21240;21241;21242;21243;21244;21245;21246	21246	519330	498510	407720	312010	385510	226480
P04247	57	P04247	P04247	sp|P04247|MYG_MOUSE Myoglobin OS=Mus musculus OX=10090 GN=Mb PE=1 SV=3	1	5.52576e-67	243.92	1	K	DKFDKFKNLKSEEDMKGSEDLKKHGCTVLTA	X;Acetyl (K);X;X;Acetyl (K);X;X;X;X;X;X;X;X;X;Oxidation (M);Acetyl (K);X;X;X;X;X;X;Acetyl (K);X;X;X;X;X;X;X;X	XXXXXXXXXXPPPPPPPPPPPPPXXXXXXXX	SEEDMK(1)GSEDLKK	6	2	-1.805		24807;24808;24809;24810;24811;24812;24813;24814;24815;24816;24817;24818;24819;24820;24821	24816	723030	688670	587700	620900	615760	475090
P04247	43	P04247	P04247	sp|P04247|MYG_MOUSE Myoglobin OS=Mus musculus OX=10090 GN=Mb PE=1 SV=3	1	0.000141642	138.21	1	K	EVLIGLFKTHPETLDKFDKFKNLKSEEDMKG	X;X;X;X;X;X;X;X;X;X;X;X;X;X;X;Acetyl (K);X;X;X;X;X;X;X;Acetyl (K);X;X;X;X;Oxidation (M);Acetyl (K);X	XXXXXXXXPPPPPPPPPPPPPXXXXXXXXXX	THPETLDK(1)FDK	8	2	0.79288		30488;30489;30490;30491;30492;30493;30494;30505	30494	9053600	9063700	9315000	7502000	7970900	7357000
P04247	46	P04247	P04247	sp|P04247|MYG_MOUSE Myoglobin OS=Mus musculus OX=10090 GN=Mb PE=1 SV=3	1	3.68916e-30	223.61	1	K	IGLFKTHPETLDKFDKFKNLKSEEDMKGSED	X;X;X;X;Acetyl (K);X;X;X;X;X;X;X;X;X;X;Acetyl (K);X;X;X;X;Acetyl (K);X;X;X;X;Oxidation (M);Acetyl (K);X;X;X;X	XXXXXPPPPPPPPPPPPPXXXXXXXXXXXXX	THPETLDKFDK(1)FK	11	2	-1.1993		30497;30498;30499;30500;30501;30502;30503;30504;30506;30507;30508	30502	568640	577110	837340	425050	546520	474630
P04247	35	P04247	P04247	sp|P04247|MYG_MOUSE Myoglobin OS=Mus musculus OX=10090 GN=Mb PE=1 SV=3	1	5.67737e-62	146.78	1	K	ADLAGHGQEVLIGLFKTHPETLDKFDKFKNL	X;X;X;X;X;X;X;X;X;X;X;X;X;X;X;Acetyl (K);X;X;X;X;X;X;X;Acetyl (K);X;X;Acetyl (K);X;X;X;X	PPPPPPPPPPPPPPPPPPPPPPPPPPPXXXX	VEADLAGHGQEVLIGLFK(1)THPETLDK	18	3	-2.645		35735;35736;35737;35738;35739;35740;35741	35740	158800	367680	1167700	295510	512900	339550
P05064	330	P05064	P05064	sp|P05064|ALDOA_MOUSE Fructose-bisphosphate aldolase A OS=Mus musculus OX=10090 GN=Aldoa PE=1 SV=2	1	0.0317011	65.168	1	K	GGKKENLKAAQEEYIKRALANSLACQGKYTP	X;X;X;X;X;X;X;X;X;X;X;X;X;X;X;Acetyl (K);X;X;X;X;X;X;X;X;X;X;X;X;X;X;X	XXXXXXXXPPPPPPPPPXXXXXXXXXXXXXX	AAQEEYIK(1)R	8	2	-4.0317		208;209;210	210	0	49641	0	18825	0	15607
P05064	99	P05064	P05064	sp|P05064|ALDOA_MOUSE Fructose-bisphosphate aldolase A OS=Mus musculus OX=10090 GN=Aldoa PE=1 SV=2	1	0.000353843	61.441	1	K	LYQKADDGRPFPQVIKSKGGVVGIKVDKGVV	X;X;X;X;X;X;X;X;X;X;X;X;X;X;X;Acetyl (K);X;X;X;X;X;X;X;X;Acetyl (K);X;X;Acetyl (K);X;X;X	XXXXPPPPPPPPPPPPPPXXXXXXXXXXXXX	PFPQVIK(1)SK	7	2	0.58024		434;435;436;437;22121	22121	0	90721	90078	47617	66722	0
P05064	312	P05064	P05064	sp|P05064|ALDOA_MOUSE Fructose-bisphosphate aldolase A OS=Mus musculus OX=10090 GN=Aldoa PE=1 SV=2	1	0.00016993	95.896	1	K	ALTFSYGRALQASALKAWGGKKENLKAAQEE	X;X;X;X;X;X;X;X;X;X;X;X;X;X;X;Acetyl (K);X;X;X;X;X;X;X;X;X;X;X;X;X;X;X	XXXXXXXXPPPPPPPPPPPPPXXXXXXXXXX	ALQASALK(1)AWGGK	8	2	-1.1981		1674;1675;1676;1677;1678;1679	1679	150280	156970	114990	79587	119220	90164
P05064;P05063	208;208	P05064	P05064	sp|P05064|ALDOA_MOUSE Fructose-bisphosphate aldolase A OS=Mus musculus OX=10090 GN=Aldoa PE=1 SV=2;sp|P05063|ALDOC_MOUSE Fructose-bisphosphate aldolase C OS=Mus musculus OX=10090 GN=Aldoc PE=1 SV=4	1	1.13207e-07	150.6	1	K	PDGDHDLKRCQYVTEKVLAAVYKALSDHHVY	X;X;X;X;X;X;X;X;X;X;X;X;X;X;X;Acetyl (K);X;X;X;X;X;X;X;X;X;X;X;X;X;X;X	XXXXXXXXXPPPPPPPPPPPPPPXXXXXXXX	CQYVTEK(1)VLAAVYK	7	2	-0.42233		3223;3224;3225	3225	10317	16545	10896	0	0	0
P05064;P05063	147;147	P05064	P05064	sp|P05064|ALDOA_MOUSE Fructose-bisphosphate aldolase A OS=Mus musculus OX=10090 GN=Aldoa PE=1 SV=2;sp|P05063|ALDOC_MOUSE Fructose-bisphosphate aldolase C OS=Mus musculus OX=10090 GN=Aldoc PE=1 SV=4	1	7.18764e-15	123.82	1	K	SERCAQYKKDGADFAKWRCVLKIGEHTPSAL	X;X;X;X;X;X;X;X;X;X;X;X;X;X;X;Acetyl (K);X;X;X;X;X;X;X;X;X;X;X;X;X;X;X	XXXXXXXXPPPPPPPPPPXXXXXXXXXXXXX	DGADFAK(1)WR	7	2	2.0131		3586;3587;3588;3589;3590;3591;14796;14797;14798;14799;14800;14801	3591	460240	332370	331180	280370	332810	369520
P05064	108	P05064	P05064	sp|P05064|ALDOA_MOUSE Fructose-bisphosphate aldolase A OS=Mus musculus OX=10090 GN=Aldoa PE=1 SV=2	1	0.00285573	64.996	1	K	PFPQVIKSKGGVVGIKVDKGVVPLAGTNGET	X;X;X;X;X;X;Acetyl (K);X;X;X;X;X;X;X;X;Acetyl (K);X;X;Acetyl (K);X;X;X;X;X;X;X;X;X;X;X;X	XXXXXXXXXPPPPPPPPPPXXXXXXXXXXXX	GGVVGIK(1)VDK	7	2	-0.32803		8127;8128;8129;8130;8131;8132	8132	792010	819040	658310	784290	775640	733070
P05064	111	P05064	P05064	sp|P05064|ALDOA_MOUSE Fructose-bisphosphate aldolase A OS=Mus musculus OX=10090 GN=Aldoa PE=1 SV=2	1	1.13099e-06	98.375	1	K	QVIKSKGGVVGIKVDKGVVPLAGTNGETTTQ	X;X;X;Acetyl (K);X;X;X;X;X;X;X;X;X;X;X;Acetyl (K);X;X;X;X;X;X;X;X;X;X;X;X;X;X;X	XXXXXXXXXXXXXPPPPPPPPPPPPPPPPPP	VDK(1)GVVPLAGTNGETTTQGLDGLSER	3	2	-0.72899		35655;35656	35656	0	11314	0	0	0	0
P05064	42	P05064	P05064	sp|P05064|ALDOA_MOUSE Fructose-bisphosphate aldolase A OS=Mus musculus OX=10090 GN=Aldoa PE=1 SV=2	1	4.27215e-42	158.35	1	K	GKGILAADESTGSIAKRLQSIGTENTEENRR	X;X;X;X;X;X;X;X;X;X;X;X;X;X;X;Acetyl (K);X;X;X;X;X;X;X;X;X;X;X;X;X;X;X	XXPPPPPPPPPPPPPPPXXXXXXXXXXXXXX	GILAADESTGSIAK(1)R	14	2	0.29042		8369;8370;8371;8372;8373;8374;8375;8376	8376	1687300	1575100	812450	555340	653490	448020
P05064	13	P05064	P05064	sp|P05064|ALDOA_MOUSE Fructose-bisphosphate aldolase A OS=Mus musculus OX=10090 GN=Aldoa PE=1 SV=2	1	1.40927e-14	145.82	1	K	___MPHPYPALTPEQKKELSDIAHRIVAPGK	X;X;X;X;X;X;X;X;X;X;X;X;X;X;X;Acetyl (K);X;X;X;X;X;X;X;X;X;X;X;X;X;X;X	XXXXPPPPPPPPPPPPPXXXXXXXXXXXXXX	PHPYPALTPEQK(1)K	12	2	-0.64405		22269;22270;22271;22272;22273;22274;22275;22276;22277;22278;22279	22279	8472900	8850800	795380	473330	642380	446290
P05201	325	P05201	P05201	sp|P05201|AATC_MOUSE Aspartate aminotransferase, cytoplasmic OS=Mus musculus OX=10090 GN=Got1 PE=1 SV=3	1	0.00314914	62.348	1	K	TLSDPELFKEWKGNVKTMADRILTMRSELRA	X;X;X;X;X;X;X;X;Acetyl (K);X;X;X;X;X;X;Acetyl (K);X;X;X;X;X;X;X;X;X;X;X;X;X;X;X	XXXXXXXXXXXXPPPPPPPPPXXXXXXXXXX	GNVK(1)TMADR	4	2	-4.3004		9023;9024;9025;9026	9026	125450	85504	68535	0	93295	0
P05201	318	P05201	P05201	sp|P05201|AATC_MOUSE Aspartate aminotransferase, cytoplasmic OS=Mus musculus OX=10090 GN=Got1 PE=1 SV=3	1	3.13065e-19	163.44	1	K	GARIVAATLSDPELFKEWKGNVKTMADRILT	X;X;X;X;X;X;X;X;X;X;X;X;X;X;X;Acetyl (K);X;X;X;X;X;X;Acetyl (K);X;X;X;X;X;X;X;X	XXXPPPPPPPPPPPPPPPPXXXXXXXXXXXX	IVAATLSDPELFK(1)EWK	13	2	-0.25926		14459;14460;14461;14462;14463;14464	14464	115870	147350	171070	100340	128600	101670
P05201	411	P05201	P05201	sp|P05201|AATC_MOUSE Aspartate aminotransferase, cytoplasmic OS=Mus musculus OX=10090 GN=Got1 PE=1 SV=3	1	3.01338e-09	104.79	1	K	KNLDYVATSIHEAVTKIQ_____________	X;X;X;X;X;X;X;X;X;X;X;X;X;X;X;Acetyl (K);X;X;X;X;X;X;X;X;X;X;X;X;X;X;X	XPPPPPPPPPPPPPPPPPXXXXXXXXXXXXX	NLDYVATSIHEAVTK(1)IQ	15	2	0.60593		21202;21203	21203	0	5752.5	9204.9	0	0	0
P05201	290	P05201	P05201	sp|P05201|AATC_MOUSE Aspartate aminotransferase, cytoplasmic OS=Mus musculus OX=10090 GN=Got1 PE=1 SV=3	1	1.68435e-17	161.82	1	K	GKESDSVLRVLSQMEKIVRITWSNPPAQGAR	X;X;X;X;X;X;X;X;X;X;X;X;X;Oxidation (M);X;Acetyl (K);X;X;X;X;X;X;X;X;X;X;X;X;X;X;X	XXXXXXXXXPPPPPPPPPPXXXXXXXXXXXX	VLSQMEK(1)IVR	7	2	-1.7697		37006;37007;37008;37009;37010;37011;37012;37013;37014	37014	836190	703530	637710	421870	475570	349660
P05202	90	P05202	P05202	sp|P05202|AATM_MOUSE Aspartate aminotransferase, mitochondrial OS=Mus musculus OX=10090 GN=Got2 PE=1 SV=1	1	3.56476e-09	135.18	1	K	YVLPSVRKAEAQIAAKNLDKEYLPIGGLAEF	X;X;X;X;X;X;X;X;X;X;X;X;X;X;X;Acetyl (K);X;X;X;X;X;X;X;X;X;X;X;X;X;X;X	XXXXXXXPPPPPPPPPPPPPXXXXXXXXXXX	AEAQIAAK(1)NLDK	8	2	0.12068		550;14764;14765;14766;14767;14768;14769	550	118590	187080	129420	148360	125950	155950
P05202	122	P05202	P05202	sp|P05202|AATM_MOUSE Aspartate aminotransferase, mitochondrial OS=Mus musculus OX=10090 GN=Got2 PE=1 SV=1	1	3.21019e-144	249.63	1	K	KASAELALGENNEVLKSGRFVTVQTISGTGA	X;X;X;X;X;X;X;X;X;X;X;X;X;X;X;Acetyl (K);X;X;X;X;X;X;X;X;X;X;X;X;X;X;X	XPPPPPPPPPPPPPPPPPPXXXXXXXXXXXX	ASAELALGENNEVLK(1)SGR	15	2	-0.30796		2240;2241;2242;2243;2244;2245;2246;2247;2248;2249;2250;2251;2252;2253;2254;2255;2256	2256	3726600	4354000	4885100	6338300	5094500	5545400
P05202	58	P05202	P05202	sp|P05202|AATM_MOUSE Aspartate aminotransferase, mitochondrial OS=Mus musculus OX=10090 GN=Got2 PE=1 SV=1	1	7.56976e-16	165.19	2	K	PILGVTEAFKRDTNSKKMNLGVGAYRDDNGK	X;X;X;X;X;X;X;X;X;X;X;X;X;X;X;Acetyl (K);Acetyl (K);Oxidation (M);X;X;X;X;X;X;X;X;X;X;X;X;X	XXXXXXXXXXXPPPPPPPPPPPPPPPXXXXX	DTNSK(1)K(1)MNLGVGAYR	5	2	-0.64426		4138;4139;4140;4141	4141	8121.2	10141	13808	0	0	6765.7
P05202	59	P05202	P05202	sp|P05202|AATM_MOUSE Aspartate aminotransferase, mitochondrial OS=Mus musculus OX=10090 GN=Got2 PE=1 SV=1	1	7.56976e-16	165.19	2	K	ILGVTEAFKRDTNSKKMNLGVGAYRDDNGKP	X;X;X;X;X;X;X;X;X;X;X;X;X;X;Acetyl (K);Acetyl (K);Oxidation (M);X;X;X;X;X;X;X;X;X;X;X;X;X;X	XXXXXXXXXXPPPPPPPPPPPPPPPXXXXXX	DTNSK(1)K(1)MNLGVGAYR	6	2	-0.64426		4138;4139;4140;4141	4141	8121.2	10141	13808	0	0	6765.7
P05202	404	P05202	P05202	sp|P05202|AATM_MOUSE Aspartate aminotransferase, mitochondrial OS=Mus musculus OX=10090 GN=Got2 PE=1 SV=1	1	8.36658e-17	174.68	1	K	EQVERLTKEFSVYMTKDGRISVAGVTSGNVG	X;X;X;X;X;X;X;X;X;X;X;X;X;Oxidation (M);X;Acetyl (K);X;X;X;X;X;X;X;X;X;X;X;X;X;X;X	XXXXXXXXPPPPPPPPPPPXXXXXXXXXXXX	EFSVYMTK(1)DGR	8	2	0.037773		4682;4683;4684;4685;4686;4687;4688	4688	208500	270950	482430	241450	291780	218660
P05202	234	P05202	P05202	sp|P05202|AATM_MOUSE Aspartate aminotransferase, mitochondrial OS=Mus musculus OX=10090 GN=Got2 PE=1 SV=1	1	5.34317e-06	126.04	1;2	K	VDPRPEQWKEIASVVKKKNLFAFFDMAYQGF	X;X;X;X;X;X;X;X;Acetyl (K);X;X;X;X;X;X;Acetyl (K);X;X;X;X;X;X;X;X;X;X;X;X;X;X;X	XXXXPPPPPPPPPPPPPXXXXXXXXXXXXXX	PEQWK(1)EIASVVK(1)K	12	2	-2.8697		4841;4842;4843;4844;4845;22042;22043;22044;22045;22046;22047;22048;22049;22050	22050	23603	435750	10169	16693	760030	714170
P05202	345	P05202	P05202	sp|P05202|AATM_MOUSE Aspartate aminotransferase, mitochondrial OS=Mus musculus OX=10090 GN=Got2 PE=1 SV=1	1	3.4743e-31	183.29	1	K	ILTSPDLRKQWLQEVKGMADRIISMRTQLVS	X;X;X;X;X;X;X;X;X;X;X;X;X;X;X;Acetyl (K);X;Oxidation (M);X;X;X;X;X;X;X;X;X;X;X;X;X	XXXXXXXXPPPPPPPPPPPPPXXXXXXXXXX	QWLQEVK(1)GMADR	7	2	2.0027		15201;15202;15203;15204;15205;15206;15207;24070;24071;24072;24073;24074;24075;24076;24077	24077	590230	978650	880490	831480	789970	785560
P05202	227	P05202	P05202	sp|P05202|AATM_MOUSE Aspartate aminotransferase, mitochondrial OS=Mus musculus OX=10090 GN=Got2 PE=1 SV=1	1	4.5969e-22	178.2	1;2	K	CAHNPTGVDPRPEQWKEIASVVKKKNLFAFF	X;X;X;X;X;X;X;X;X;X;X;X;X;X;X;Acetyl (K);X;X;X;X;X;X;Acetyl (K);X;X;X;X;X;X;X;X	XXXXXXXXXXXPPPPPPPPPPPPPXXXXXXX	PEQWK(1)EIASVVK(1)K	5	2	-2.8697		22036;22037;22038;22039;22040;22041;22042;22043;22044;22045;22046;22047;22048;22049;22050	22050	10966000	10617000	9516700	10694000	10861000	9978200
P05202	309	P05202	P05202	sp|P05202|AATM_MOUSE Aspartate aminotransferase, mitochondrial OS=Mus musculus OX=10090 GN=Got2 PE=1 SV=1	1	1.01026e-17	154.56	1	K	VCKDAEEAKRVESQLKILIRPLYSNPPLNGA	X;X;Acetyl (K);X;X;X;X;X;Acetyl (K);X;X;X;X;X;X;Acetyl (K);X;X;X;X;X;X;X;X;X;X;X;X;X;X;X	XXXXXXXXXPPPPPPPPPPPXXXXXXXXXXX	VESQLK(1)ILIR	6	2	-0.97231		24232;24233;24234;24235;24236;24237;24238;35903;35904;35905;35906;35907;35908;35909;35910;35911;35912;35913;35914;35915;35916;35917;35918;35919;35920;35921;35922;35923;35924;35925;35926;35927;35928;35929;35930;35931;35932;35933;35934;35935;35936;35937;35938;35939;35940;35941;35942;35943;35944;35945;35946;35947;35948;35949;35950;35951;35952;35953;35954	35954	582560	845270	1030300	547980	733260	832580
P05202	363	P05202	P05202	sp|P05202|AATM_MOUSE Aspartate aminotransferase, mitochondrial OS=Mus musculus OX=10090 GN=Got2 PE=1 SV=1	1	3.16772e-06	77.134	1	K	ADRIISMRTQLVSNLKKEGSSHNWQHITDQI	X;X;X;X;X;X;X;X;X;X;X;X;X;X;X;Acetyl (K);X;X;X;X;X;X;X;X;X;X;X;X;X;X;X	XXXXXXXXPPPPPPPPPXXXXXXXXXXXXXX	TQLVSNLK(1)K	8	2	-2.0608		32927;32928;32929;32930;32931;32932;32933;32934;32935	32935	6062000	5319300	6538900	4931800	5528100	6125800
P05202	296	P05202	P05202	sp|P05202|AATM_MOUSE Aspartate aminotransferase, mitochondrial OS=Mus musculus OX=10090 GN=Got2 PE=1 SV=1	1	1.64217e-11	101.86	1;2	K	MGLYGERVGAFTVVCKDAEEAKRVESQLKIL	X;X;X;X;X;X;X;X;X;X;X;X;X;X;X;Acetyl (K);X;X;X;X;X;Acetyl (K);X;X;X;X;X;X;Acetyl (K);X;X	XXXXXXXPPPPPPPPPPPPPPPPXXXXXXXX	VGAFTVVCK(1)DAEEAK(1)R	9	2	-0.063107		36122;36123;36124;36125;36126;36127;36128;36129	36129	76786	134390	155500	78442	102980	106210
P05202	302	P05202	P05202	sp|P05202|AATM_MOUSE Aspartate aminotransferase, mitochondrial OS=Mus musculus OX=10090 GN=Got2 PE=1 SV=1	1	0.000290629	72.752	2	K	RVGAFTVVCKDAEEAKRVESQLKILIRPLYS	X;X;X;X;X;X;X;X;X;Acetyl (K);X;X;X;X;X;Acetyl (K);X;X;X;X;X;X;Acetyl (K);X;X;X;X;X;X;X;X	XPPPPPPPPPPPPPPPPXXXXXXXXXXXXXX	VGAFTVVCK(1)DAEEAK(1)R	15	2	-0.063107		36129	36129	0	0	13828	0	0	0
P05213;P68369;P05214	336;336;336	P05213;P68369	P05213	sp|P05213|TBA1B_MOUSE Tubulin alpha-1B chain OS=Mus musculus OX=10090 GN=Tuba1b PE=1 SV=2;sp|P68369|TBA1A_MOUSE Tubulin alpha-1A chain OS=Mus musculus OX=10090 GN=Tuba1a PE=1 SV=1;sp|P05214|TBA3_MOUSE Tubulin alpha-3 chain OS=Mus musculus OX=10090 GN=Tuba3	1	0.000647178	76.828	1	K	GDVVPKDVNAAIATIKTKRSIQFVDWCPTGF;GDVVPKDVNAAIATIKTKRTIQFVDWCPTGF	X;X;X;X;X;X;X;X;X;X;X;X;X;X;X;Acetyl (K);X;X;X;X;X;X;X;X;X;X;X;X;X;X;X	XXXXXXPPPPPPPPPPPPXXXXXXXXXXXXX	DVNAAIATIK(1)TK	10	2	0.026404		4196;4197;4198	4198	24550	0	9868.8	0	7747.2	0
P06151	243	P06151	P06151	sp|P06151|LDHA_MOUSE L-lactate dehydrogenase A chain OS=Mus musculus OX=10090 GN=Ldha PE=1 SV=3	1	5.1265e-22	204.92	1	K	KEVHKQVVDSAYEVIKLKGYTSWAIGLSVAD	Acetyl (K);X;X;X;X;X;X;X;X;X;X;X;X;X;X;Acetyl (K);X;X;X;X;X;X;X;X;X;X;X;X;X;X;X	XXXXXPPPPPPPPPPPPPXXXXXXXXXXXXX	QVVDSAYEVIK(1)LK	11	2	-1.0436		24015;24016;24017;24018;24019;24020	24020	139460	114790	126260	77107	96977	70308
P06151	224	P06151	P06151	sp|P06151|LDHA_MOUSE L-lactate dehydrogenase A chain OS=Mus musculus OX=10090 GN=Ldha PE=1 SV=3	1	1.11687e-25	160.82	1	K	VSLKSLNPELGTDADKEQWKEVHKQVVDSAY	X;X;X;X;X;X;X;X;X;X;X;X;X;X;X;Acetyl (K);X;X;X;X;X;X;X;X;X;X;X;X;X;X;X	XXXXPPPPPPPPPPPPPPPPXXXXXXXXXXX	SLNPELGTDADK(1)EQWK	12	2	-1.7853		26206;26207;26208;26209;26210;26211	26211	78365	80600	76415	63684	71632	47453
P06151	228	P06151	P06151	sp|P06151|LDHA_MOUSE L-lactate dehydrogenase A chain OS=Mus musculus OX=10090 GN=Ldha PE=1 SV=3	0.996117	3.02287e-15	82.072	1	K	SLNPELGTDADKEQWKEVHKQVVDSAYEVIK	X;X;X;X;X;X;X;X;X;X;X;X;X;X;X;Acetyl (K);X;X;X;X;X;X;X;X;X;X;X;X;X;X;Acetyl (K)	PPPPPPPPPPPPPPPPPPPPXXXXXXXXXXX	SLNPELGTDADK(0.004)EQWK(0.996)EVHK	16	3	-1.9096		26212;26213;26214;26215;26216;26217	26212	45122	46740	35819	22850	8205.5	0
P06745	25	P06745	P06745	sp|P06745|G6PI_MOUSE Glucose-6-phosphate isomerase OS=Mus musculus OX=10090 GN=Gpi PE=1 SV=4	1	0.00923987	58.387	1	K	FQKLLEWHRANSANLKLRELFEADPERFNNF	X;X;Acetyl (K);X;X;X;X;X;X;X;X;X;X;X;X;Acetyl (K);X;X;X;X;X;X;X;X;X;X;X;X;X;X;X	XXXXXXXXXPPPPPPPPPXXXXXXXXXXXXX	ANSANLK(1)LR	7	2	-0.75365		2022;2023	2023	0	24625	25034	0	0	0
P06745	12	P06745	P06745	sp|P06745|G6PI_MOUSE Glucose-6-phosphate isomerase OS=Mus musculus OX=10090 GN=Gpi PE=1 SV=4	1	8.90108e-10	127.61	1	K	____MAALTRNPQFQKLLEWHRANSANLKLR	X;X;X;X;X;X;X;X;X;X;X;X;X;X;X;Acetyl (K);X;X;X;X;X;X;X;X;X;X;X;X;Acetyl (K);X;X	XXXXXXXXXXPPPPPPPPPPPPXXXXXXXXX	NPQFQK(1)LLEWHR	6	2	-0.51706		21455;21456;21457;21458	21458	30907	0	35018	0	22205	14573
P06745	142	P06745	P06745	sp|P06745|G6PI_MOUSE Glucose-6-phosphate isomerase OS=Mus musculus OX=10090 GN=Gpi PE=1 SV=4	1	8.68011e-07	112.67	1	K	DKMKSFCQRVRSGDWKGYTGKSITDIINIGI	X;X;X;X;X;X;X;X;X;X;X;X;X;X;X;Acetyl (K);X;X;X;X;X;X;X;X;X;X;X;X;X;X;X	XXXXXXXXXXXPPPPPPPPPPXXXXXXXXXX	SGDWK(1)GYTGK	5	2	-0.53618		25329;25330;25331;25332;25333;25334	25334	227950	212340	151530	219560	191810	170760
P06745	461	P06745	P06745	sp|P06745|G6PI_MOUSE Glucose-6-phosphate isomerase OS=Mus musculus OX=10090 GN=Gpi PE=1 SV=4	1	3.2546e-10	122.75	1	K	RKELQAAGKSPEDLEKLLPHKVFEGNRPTNS	X;X;X;X;X;X;X;X;X;X;X;X;X;X;X;Acetyl (K);X;X;X;X;X;X;X;X;X;X;X;X;X;X;X	XXXXXXXXXPPPPPPPPPPPPXXXXXXXXXX	SPEDLEK(1)LLPHK	7	2	-2.2303		26622;26623;26624;26625;26626;26627	26627	130910	103650	127460	89372	115580	87787
P07309	35	P07309	P07309	sp|P07309|TTHY_MOUSE Transthyretin OS=Mus musculus OX=10090 GN=Ttr PE=1 SV=1	1	2.32876e-06	135.25	1	K	AGPAGAGESKCPLMVKVLDAVRGSPAVDVAV	X;X;X;X;X;X;X;X;X;X;X;X;X;Oxidation (M);X;Acetyl (K);X;X;X;X;X;X;X;X;X;X;X;X;X;X;X	XXXXXXXXXXPPPPPPPPPPPPXXXXXXXXX	CPLMVK(1)VLDAVR	6	2	-1.8156		3204;3205;3206;3207;3208;3209;3210	3210	214570	103280	1170800	19217	541540	15006
P07310	156	P07310	P07310	sp|P07310|KCRM_MOUSE Creatine kinase M-type OS=Mus musculus OX=10090 GN=Ckm PE=1 SV=1	1	2.90906e-09	99.269	1	K	TLPPHCSRGERRAVEKLSVEALNSLTGEFKG	X;X;X;X;X;X;X;X;X;X;X;X;X;X;X;Acetyl (K);X;X;X;X;X;X;X;X;X;X;X;X;X;Acetyl (K);X	XXXXXXXXXXXXPPPPPPPPPPPPPPPPPPX	AVEK(1)LSVEALNSLTGEFK	4	2	-0.043336		2663;2664;2665;2666	2666	0	11905	28714	0	10438	4929.9
P07310	170	P07310	P07310	sp|P07310|KCRM_MOUSE Creatine kinase M-type OS=Mus musculus OX=10090 GN=Ckm PE=1 SV=1	1	1.24578e-34	189.99	1	K	EKLSVEALNSLTGEFKGKYYPLKSMTEQEQQ	X;X;X;X;X;X;X;X;X;X;X;X;X;X;X;Acetyl (K);X;X;X;X;X;X;X;X;X;X;X;X;X;X;X	XXPPPPPPPPPPPPPPPPXXXXXXXXXXXXX	LSVEALNSLTGEFK(1)GK	14	2	0.288		18696;18697;18698;18699;18700;18701	18701	20171	53838	56007	27623	28315	19819
P07310	11	P07310	P07310	sp|P07310|KCRM_MOUSE Creatine kinase M-type OS=Mus musculus OX=10090 GN=Ckm PE=1 SV=1	0.994849	0.0300554	41.224	1	K	_____MPFGNTHNKFKLNYKPQEEYPDLSKH	X;X;X;X;X;X;X;X;X;X;X;X;X;X;X;Acetyl (K);X;X;X;Acetyl (K);X;X;X;X;X;X;X;X;X;X;X	XXXXXXXXXXXXXXPPPPPPPPPPPPPPPPX	FK(0.995)LNYK(0.005)PQEEYPDLSK	2	2	-1.6073		6431	6431	0	21939	0	0	0	0
P07310	15	P07310	P07310	sp|P07310|KCRM_MOUSE Creatine kinase M-type OS=Mus musculus OX=10090 GN=Ckm PE=1 SV=1	1	0.0136343	54.352	1	K	_MPFGNTHNKFKLNYKPQEEYPDLSKHNNHM	X;X;X;X;X;X;X;X;X;Acetyl (K);X;X;X;X;X;Acetyl (K);X;X;X;X;X;X;X;X;X;X;X;X;X;X;X	XXXXXXXXXXXXPPPPPPPPPPPPPPXXXXX	LNYK(1)PQEEYPDLSK	4	2	-1.4788		18190;18191;18192	18192	0	11547	15629	10232	0	0
P07310	247	P07310	P07310	sp|P07310|KCRM_MOUSE Creatine kinase M-type OS=Mus musculus OX=10090 GN=Ckm PE=1 SV=1	1	0.00476079	96.857	1	K	EDHLRVISMEKGGNMKEVFRRFCVGLQKIEE	X;X;X;X;X;X;X;X;X;X;X;X;X;X;X;Acetyl (K);X;X;X;X;X;X;X;X;X;X;X;X;X;X;X	XXXXXXXXXXXPPPPPPPPPXXXXXXXXXXX	GGNMK(1)EVFR	5	2	-0.38951		8093;8094	8094	30227	0	0	19533	0	0
P07310	298	P07310	P07310	sp|P07310|KCRM_MOUSE Creatine kinase M-type OS=Mus musculus OX=10090 GN=Ckm PE=1 SV=1	1	0.000375822	106.68	1	K	CPSNLGTGLRGGVHVKLANLSKHPKFEEILT	X;X;X;X;X;X;X;X;X;X;X;X;X;X;X;Acetyl (K);X;X;X;X;X;Acetyl (K);X;X;Acetyl (K);X;X;X;X;X;X	XXXXXXXXXXPPPPPPPPPPPPXXXXXXXXX	GGVHVK(1)LANLSK	6	2	-1.1935		8118;8119;8120;8121;8122;8123	8123	651920	664030	469650	315110	499050	415380
P07310	304	P07310	P07310	sp|P07310|KCRM_MOUSE Creatine kinase M-type OS=Mus musculus OX=10090 GN=Ckm PE=1 SV=1	1	0.00410356	87.817	1	K	TGLRGGVHVKLANLSKHPKFEEILTRLRLQK	X;X;X;X;X;X;X;X;X;X;X;X;X;X;X;Acetyl (K);X;X;Acetyl (K);X;X;X;X;X;X;X;X;X;X;X;X	XXXXXXXXXXPPPPPPPPPXXXXXXXXXXXX	LANLSK(1)HPK	6	2	-0.92118		15453;15454;15455;15456;15457;15458	15458	300920	258320	208760	172090	213850	186130
P07310	101	P07310	P07310	sp|P07310|KCRM_MOUSE Creatine kinase M-type OS=Mus musculus OX=10090 GN=Ckm PE=1 SV=1	1	0.00418585	62.17	1	K	KDLFDPIIQDRHGGYKPTDKHKTDLNHENLK	X;X;X;X;X;X;X;X;X;X;X;X;X;X;X;Acetyl (K);X;X;X;X;X;X;X;X;X;X;X;X;X;X;Acetyl (K)	XXXXXXXXXXXPPPPPPPPPXXXXXXXXXXX	HGGYK(1)PTDK	5	2	-0.7943		10555;10556;10557;10558;10559;10560	10560	165680	168490	107900	87413	108570	99282
P07310	32	P07310	P07310	sp|P07310|KCRM_MOUSE Creatine kinase M-type OS=Mus musculus OX=10090 GN=Ckm PE=1 SV=1	1	9.70967e-10	69.34	1	K	QEEYPDLSKHNNHMAKVLTPDLYNKLRDKET	X;X;X;X;X;X;X;X;X;X;X;X;X;X;X;Acetyl (K);X;X;X;X;X;X;X;X;Acetyl (K);X;X;X;X;X;X	XXXXXXXXXPPPPPPPPPPPPPPPPXXXXXX	HNNHMAK(1)VLTPDLYNK	7	2	-3.0884		11500;11501;11502	11502	10756	13732	7877.4	0	0	0
P07310	41	P07310	P07310	sp|P07310|KCRM_MOUSE Creatine kinase M-type OS=Mus musculus OX=10090 GN=Ckm PE=1 SV=1	1	0.000512597	80.774	1	K	HNNHMAKVLTPDLYNKLRDKETPSGFTLDDV	X;X;X;X;X;X;X;X;X;X;X;X;X;X;X;Acetyl (K);X;X;X;X;X;X;X;X;X;X;X;X;X;X;X	XXXXXXXPPPPPPPPPPPXXXXXXXXXXXXX	VLTPDLYNK(1)LR	9	2	-1.1096		37038;37039;37040	37040	0	112390	117720	0	85398	0
P07310	307	P07310	P07310	sp|P07310|KCRM_MOUSE Creatine kinase M-type OS=Mus musculus OX=10090 GN=Ckm PE=1 SV=1	1	5.07512e-06	101.86	1	K	RGGVHVKLANLSKHPKFEEILTRLRLQKRGT	X;X;X;X;X;X;Acetyl (K);X;X;X;X;X;X;X;X;Acetyl (K);X;X;X;X;X;X;X;X;X;X;X;X;X;X;X	XXXXXXXXXXXXXPPPPPPPPPPXXXXXXXX	HPK(1)FEEILTR	3	2	1.7704		11589;11590;11591;11592;11593;11594	11594	1085800	768300	820390	502080	621100	478200
P07310	369	P07310	P07310	sp|P07310|KCRM_MOUSE Creatine kinase M-type OS=Mus musculus OX=10090 GN=Ckm PE=1 SV=1	1	4.32192e-54	232.59	1	K	VDGVKLMVEMEKKLEKGQSIDDMIPAQK___	X;X;X;X;X;X;X;X;X;X;X;X;X;X;X;Acetyl (K);X;X;X;X;X;X;Oxidation (M);X;X;X;X;X;X;X;X	XXXXXXXXXXXXPPPPPPPPPPPPPPPPXXX	LEK(1)GQSIDDMIPAQK	3	2	-1.729		15119;15120;15121;15122;15123;15124;15934;15935;15936;15937;15938;15939;15940;15941;15942;15943;15944;15945	15945	542350	531980	438260	309260	385570	287240
P07310	9	P07310	P07310	sp|P07310|KCRM_MOUSE Creatine kinase M-type OS=Mus musculus OX=10090 GN=Ckm PE=1 SV=1	1	9.91768e-13	133.49	1	K	_______MPFGNTHNKFKLNYKPQEEYPDLS	X;X;X;X;X;X;X;X;X;X;X;X;X;X;X;Acetyl (K);X;Acetyl (K);X;X;X;Acetyl (K);X;X;X;X;X;X;X;X;X	XXXXXXXXPPPPPPPPPPXXXXXXXXXXXXX	PFGNTHNK(1)FK	8	2	-0.71461		22077;22078;22079;22080;22081;22082;22083;22084	22084	465860	377560	203760	80399	127100	96558
P07310	116	P07310	P07310	sp|P07310|KCRM_MOUSE Creatine kinase M-type OS=Mus musculus OX=10090 GN=Ckm PE=1 SV=1	1	1.70618e-21	112.31	1	K	KPTDKHKTDLNHENLKGGDDLDPNYVLSSRV	Acetyl (K);X;X;X;X;X;X;X;X;X;X;X;X;X;X;Acetyl (K);X;X;X;X;X;X;X;X;X;X;X;X;X;X;X	XXXXXXXPPPPPPPPPPPPPPPPPPPPPPPX	TDLNHENLK(1)GGDDLDPNYVLSSR	9	3	-3.2256		28737;28738;28739;28740;28741;28742	28742	84331	73042	65962	53388	61025	39004
P07310;Q6P8J7;P30275	242;276;276	P07310;Q6P8J7	P07310	sp|P07310|KCRM_MOUSE Creatine kinase M-type OS=Mus musculus OX=10090 GN=Ckm PE=1 SV=1;sp|Q6P8J7|KCRS_MOUSE Creatine kinase S-type, mitochondrial OS=Mus musculus OX=10090 GN=Ckmt2 PE=1 SV=1;sp|P30275|KCRU_MOUSE Creatine kinase U-type, mitochondrial OS=Mus m	1	3.11989e-10	175.81	1	K	IWINEEDHTRVISMEKGGNMKRVFERFCRGL;VWVNEEDHLRVISMEKGGNMKEVFRRFCVGL	X;X;X;X;X;X;X;X;X;X;X;X;X;Oxidation (M);X;Acetyl (K);X;X;X;Oxidation (M);Acetyl (K);X;X;X;X;X;X;X;X;X;X	XXXXXXXXXXPPPPPPPPPPPXXXXXXXXXX	VISMEK(1)GGNMK	6	2	-1.6272		36617;36618;36619;36620;36621;36622;36623;36624;36625;36626;36627;36628;36629;36630;36631;36632;36633;36634;36635;36636;36637;36638;36639;36640	36640	6332200	5089100	5862800	4998300	5478100	4812400
P07356	212	P07356	P07356	sp|P07356|ANXA2_MOUSE Annexin A2 OS=Mus musculus OX=10090 GN=Anxa2 PE=1 SV=2	1	0.0182987	44.41	1	K	ELYDAGVKRKGTDVPKWISIMTERSVCHLQK	X;X;X;X;X;X;X;X;X;X;X;X;X;X;X;Acetyl (K);X;X;X;X;X;X;X;X;X;X;X;X;X;X;Acetyl (K)	XXXXXXXXXXPPPPPPPPPPPPPPXXXXXXX	GTDVPK(1)WISIMTER	6	2	-3.7034		9406;9407	9407	0	0	7822.6	0	0	1904.2
P07356	302	P07356	P07356	sp|P07356|ANXA2_MOUSE Annexin A2 OS=Mus musculus OX=10090 GN=Anxa2 PE=1 SV=2	1	4.53379e-06	87.815	1	K	VLIRIMVSRSEVDMLKIRSEFKRKYGKSLYY	X;X;X;X;X;X;X;X;X;X;X;X;X;X;X;Acetyl (K);X;X;X;X;X;X;X;X;X;X;X;X;X;X;X	XXXXXXXXXPPPPPPPPPXXXXXXXXXXXXX	SEVDMLK(1)IR	7	2	-1.4252		25008;25009;25010;25011;25012;25013	25013	125440	111070	128080	99287	96497	83648
P07356	227	P07356	P07356	sp|P07356|ANXA2_MOUSE Annexin A2 OS=Mus musculus OX=10090 GN=Anxa2 PE=1 SV=2	1	1.82485e-06	140.04	1	K	KWISIMTERSVCHLQKVFERYKSYSPYDMLE	Acetyl (K);X;X;X;X;X;X;X;X;X;X;X;X;X;X;Acetyl (K);X;X;X;X;X;X;X;X;X;X;X;X;X;X;X	XXXXXXXXXPPPPPPPPPPPXXXXXXXXXXX	SVCHLQK(1)VFER	7	2	0.80244		27413;27414;27415;27416;27417;27418	27418	2154000	2552300	2593700	2336200	2484300	2741300
P07356	157	P07356	P07356	sp|P07356|ANXA2_MOUSE Annexin A2 OS=Mus musculus OX=10090 GN=Anxa2 PE=1 SV=2	1	6.52082e-34	184.5	1	K	EINRVYKEMYKTDLEKDIISDTSGDFRKLMV	X;X;X;X;X;X;X;X;X;X;X;X;X;X;X;Acetyl (K);X;X;X;X;X;X;X;X;X;X;X;X;X;X;X	XXXXXXXXXXXPPPPPPPPPPPPPPPPXXXX	TDLEK(1)DIISDTSGDFR	5	2	-2.0767		28718;28719;28720;28721;28722;28723	28723	25916	37289	55718	37276	41110	29702
P07724	588	P07724	P07724	sp|P07724|ALBU_MOUSE Albumin OS=Mus musculus OX=10090 GN=Alb PE=1 SV=3	1	1.44766e-38	205.53	1	K	DDFAQFLDTCCKAADKDTCFSTEGPNLVTRC	X;X;X;X;X;X;X;X;X;X;X;X;X;X;X;Acetyl (K);X;X;X;X;X;X;X;X;X;X;X;X;X;X;X	XXXXXXXXXXXXPPPPPPPPPPPPPPPPPPX	AADK(1)DTCFSTEGPNLVTR	4	2	-4.0054		57;58;59;60;61;62	62	370810	347590	478970	195560	273740	189360
P07724	286	P07724	P07724	sp|P07724|ALBU_MOUSE Albumin OS=Mus musculus OX=10090 GN=Alb PE=1 SV=3	1	1.74717e-23	156.1	1	K	HGDLLECADDRAELAKYMCENQATISSKLQT	X;X;X;X;X;X;X;X;X;X;X;X;X;X;X;Acetyl (K);X;X;X;X;X;X;X;X;X;X;X;X;X;X;X	XXXXXXXXXXXPPPPPPPPPPPPPPPPPXXX	AELAK(1)YMCENQATISSK	5	2	1.9873		586;587;588;589;590;591	591	60007	49880	50177	13655	31378	17266
P07724	543	P07724	P07724	sp|P07724|ALBU_MOUSE Albumin OS=Mus musculus OX=10090 GN=Alb PE=1 SV=3	1	3.20224e-18	166.83	1	K	AETFTFHSDICTLPEKEKQIKKQTALAELVK	X;X;X;X;X;X;X;X;X;X;X;X;X;X;X;Acetyl (K);X;X;X;X;X;X;X;X;X;X;X;X;X;X;Acetyl (K)	PPPPPPPPPPPPPPPPPPXXXXXXXXXXXXX	AETFTFHSDICTLPEK(1)EK	16	2	-1.1832		667;668;669;670;671;672;673;674;675	675	203510	189110	89965	0	46766	12869
P07724	229	P07724	P07724	sp|P07724|ALBU_MOUSE Albumin OS=Mus musculus OX=10090 GN=Alb PE=1 SV=3	1	6.42101e-18	164.49	1	K	LVSSVRQRMKCSSMQKFGERAFKAWAVARLS	X;X;X;X;X;X;X;X;X;X;X;X;X;Oxidation (M);X;Acetyl (K);X;X;X;X;X;X;X;X;X;X;X;X;X;X;X	XXXXXXXXXXPPPPPPPPPPXXXXXXXXXXX	CSSMQK(1)FGER	6	2	-0.33709		3247;3248;3249;3250;3251;3252;3253;3254	3254	373790	257570	305030	79787	221670	107660
P07724	212	P07724	P07724	sp|P07724|ALBU_MOUSE Albumin OS=Mus musculus OX=10090 GN=Alb PE=1 SV=3	1	1.55588e-09	119.78	1	K	DKESCLTPKLDGVKEKALVSSVRQRMKCSSM	X;X;X;X;X;X;X;X;Acetyl (K);X;X;X;X;X;X;Acetyl (K);X;X;X;X;X;X;X;X;X;X;Acetyl (K);X;X;X;Oxidation (M)	XXXXXXXXXXXXXXPPPPPPPPPXXXXXXXX	EK(1)ALVSSVR	2	2	0.32486		4911;4912;4913;4914;4915;4916	4916	786190	583680	601150	182700	458180	314890
P07724	117	P07724	P07724	sp|P07724|ALBU_MOUSE Albumin OS=Mus musculus OX=10090 GN=Alb PE=1 SV=3	1	5.41224e-13	127.21	1	K	PNLRENYGELADCCTKQEPERNECFLQHKDD	X;X;X;X;X;X;X;X;X;X;X;X;X;X;X;Acetyl (K);X;X;X;X;X;X;X;X;X;X;X;X;X;X;X	XXXXPPPPPPPPPPPPPPPPPXXXXXXXXXX	ENYGELADCCTK(1)QEPER	12	2	-0.62959		5223;5224;5225;5226;5227;5228	5228	69828	66540	43301	19596	49584	20602
P07724	205	P07724	P07724	sp|P07724|ALBU_MOUSE Albumin OS=Mus musculus OX=10090 GN=Alb PE=1 SV=3	1	0.000246066	105.85	1	K	TQCCAEADKESCLTPKLDGVKEKALVSSVRQ	X;X;X;X;X;X;X;X;X;X;X;X;X;X;X;Acetyl (K);X;X;X;X;X;X;Acetyl (K);X;X;X;X;X;X;X;X	XXXXXXXXXPPPPPPPPPPPPXXXXXXXXXX	ESCLTPK(1)LDGVK	7	2	0.80393		5326;5327;5328;5329;5330;5331	5331	221810	162520	132020	59952	138380	74093
P07724	264	P07724	P07724	sp|P07724|ALBU_MOUSE Albumin OS=Mus musculus OX=10090 GN=Alb PE=1 SV=3	1	0.00206589	64.718	1	K	NADFAEITKLATDLTKVNKECCHGDLLECAD	X;X;X;X;X;X;X;X;X;X;X;X;X;X;X;Acetyl (K);X;X;X;X;X;X;X;X;X;X;X;X;X;X;X	XXXXXXXXXPPPPPPPPPPXXXXXXXXXXXX	LATDLTK(1)VNK	7	2	-1.4355		15549;15550;15551;15552;15553	15553	165840	189040	151370	81442	0	85374
P07724	305	P07724	P07724	sp|P07724|ALBU_MOUSE Albumin OS=Mus musculus OX=10090 GN=Alb PE=1 SV=3	1	1.18393e-31	179.47	1	K	ENQATISSKLQTCCDKPLLKKAHCLSEVEHD	X;X;X;X;X;X;X;X;X;X;X;X;X;X;X;Acetyl (K);X;X;X;X;X;X;X;X;X;X;X;X;X;X;X	XXXXXXXXXPPPPPPPPPPPXXXXXXXXXXX	LQTCCDK(1)PLLK	7	2	-0.50556		18403;18404;18405;18406;18407;18408;18409;18410	18410	1840500	1487100	910650	270840	538050	377080
P07724	309	P07724	P07724	sp|P07724|ALBU_MOUSE Albumin OS=Mus musculus OX=10090 GN=Alb PE=1 SV=3	1	8.47906e-31	200.17	1	K	TISSKLQTCCDKPLLKKAHCLSEVEHDTMPA	X;X;X;X;X;X;X;X;X;X;X;X;X;X;X;Acetyl (K);X;X;X;X;X;X;X;X;X;X;X;X;X;X;X	XXXXXPPPPPPPPPPPPXXXXXXXXXXXXXX	LQTCCDKPLLK(1)K	11	2	-0.35666		18411;18412;18413;18414;18415;18416;18417;18418;18419;18420;18421;18422	18420	81110	57745	89657	17378	88450	42160
P07724	75	P07724	P07724	sp|P07724|ALBU_MOUSE Albumin OS=Mus musculus OX=10090 GN=Alb PE=1 SV=3	1	3.58193e-10	74.811	1	K	YDEHAKLVQEVTDFAKTCVADESAANCDKSL	X;X;X;X;X;X;X;X;X;X;X;X;X;X;X;Acetyl (K);X;X;X;X;X;X;X;X;X;X;X;X;Acetyl (K);X;X	XXXXXXPPPPPPPPPPPPPPPPPPPPPPPXX	LVQEVTDFAK(1)TCVADESAANCDK	10	3	-0.28434		19171	19171	0	0	15016	0	0	0
P07724	88	P07724	P07724	sp|P07724|ALBU_MOUSE Albumin OS=Mus musculus OX=10090 GN=Alb PE=1 SV=3	1	4.25984e-10	83.402	1	K	FAKTCVADESAANCDKSLHTLFGDKLCAIPN	X;X;X;X;X;X;X;X;X;X;X;X;X;X;X;Acetyl (K);X;X;X;X;X;X;X;X;X;X;X;X;X;X;X	XXXPPPPPPPPPPPPPPPPPPPPPPXXXXXX	TCVADESAANCDK(1)SLHTLFGDK	13	3	-0.79227		28569;28570;28571;28572;28573	28573	46446	37848	35791	0	14609	0
P07724	223	P07724	P07724	sp|P07724|ALBU_MOUSE Albumin OS=Mus musculus OX=10090 GN=Alb PE=1 SV=3	1	0.00756966	87.945	1	K	GVKEKALVSSVRQRMKCSSMQKFGERAFKAW	X;X;X;X;Acetyl (K);X;X;X;X;X;X;X;X;X;X;Acetyl (K);X;X;X;Oxidation (M);X;Acetyl (K);X;X;X;X;X;X;X;X;X	XXXXXXXXXXXXXXPPPPPPPPXXXXXXXXX	MK(1)CSSMQK	2	2	-0.45073		20002;20003;20004	20004	0	9104.7	19901	0	21229	0
P07724	413	P07724	P07724	sp|P07724|ALBU_MOUSE Albumin OS=Mus musculus OX=10090 GN=Alb PE=1 SV=3	1	4.18368e-06	111.06	1	K	LAEFQPLVEEPKNLVKTNCDLYEKLGEYGFQ	X;X;X;X;X;X;X;X;X;X;X;X;X;X;X;Acetyl (K);X;X;X;X;X;X;X;X;X;X;X;X;X;X;X	XXXXXXXXXXXXPPPPPPPPPPPPXXXXXXX	NLVK(1)TNCDLYEK	4	2	-0.60248		21326;21327	21327	121920	0	69500	0	0	0
P07724	558	P07724	P07724	sp|P07724|ALBU_MOUSE Albumin OS=Mus musculus OX=10090 GN=Alb PE=1 SV=3	1	2.45393e-66	185.21	1	K	KEKQIKKQTALAELVKHKPKATAEQLKTVMD	Acetyl (K);X;X;X;X;X;X;X;X;X;X;X;X;X;X;Acetyl (K);X;X;X;X;X;X;X;X;X;X;X;X;X;Oxidation (M);X	XXXXXXXPPPPPPPPPPPPPXXXXXXXXXXX	QTALAELVK(1)HK	9	2	1.3058		23921;23922;23923;23924;23925;23926;23927;23928;23929;23930;23931;23932	23926	49487	41126	24061	15997	24836	27772
P07724	499	P07724	P07724	sp|P07724|ALBU_MOUSE Albumin OS=Mus musculus OX=10090 GN=Alb PE=1 SV=3	1	1.27239e-06	76.321	1	K	VCLLHEKTPVSEHVTKCCSGSLVERRPCFSA	X;X;X;X;X;X;X;X;X;X;X;X;X;X;X;Acetyl (K);X;X;X;X;X;X;X;X;X;X;X;X;X;X;X	XXXXXXXPPPPPPPPPPPPPPPPPPXXXXXX	TPVSEHVTK(1)CCSGSLVER	9	2	-1.5972		32692;32693;32694;32695;32696	32696	90985	85633	95000	0	0	0
P07724	490	P07724	P07724	sp|P07724|ALBU_MOUSE Albumin OS=Mus musculus OX=10090 GN=Alb PE=1 SV=3	1	7.62903e-15	192.69	1	K	DYLSAILNRVCLLHEKTPVSEHVTKCCSGSL	X;X;X;X;X;X;X;X;X;X;X;X;X;X;X;Acetyl (K);X;X;X;X;X;X;X;X;Acetyl (K);X;X;X;X;X;X	XXXXXXXXXPPPPPPPPPPPPPPPPXXXXXX	VCLLHEK(1)TPVSEHVTK	7	2	-1.7543		35546;35547;35548;35549;35550;35551;35552;35553;35554;35555;35556	35556	488130	385480	214740	52000	165180	72767
P07724	438	P07724	P07724	sp|P07724|ALBU_MOUSE Albumin OS=Mus musculus OX=10090 GN=Alb PE=1 SV=3	1	1.69218e-23	141.93	1	K	GEYGFQNAILVRYTQKAPQVSTPTLVEAARN	X;X;X;X;X;X;X;X;X;X;X;X;X;X;X;Acetyl (K);X;X;X;X;X;X;X;X;X;X;X;X;X;X;X	XXXXXXXXXXXXPPPPPPPPPPPPPPPPPPX	YTQK(1)APQVSTPTLVEAAR	4	2	-1.4091		39959;39960;39961;39962;39963;39964	39964	342870	263270	533120	77781	548560	159130
Q00896;P07758;Q00898	292;292;292	Q00896;Q00898	Q00896	sp|Q00896|A1AT3_MOUSE Alpha-1-antitrypsin 1-3 OS=Mus musculus OX=10090 GN=Serpina1c PE=1 SV=2;sp|P07758|A1AT1_MOUSE Alpha-1-antitrypsin 1-1 OS=Mus musculus OX=10090 GN=Serpina1a PE=1 SV=4;sp|Q00898|A1AT5_MOUSE Alpha-1-antitrypsin 1-5 OS=Mus musculus OX=100	1	1.19669e-05	78.411	1	K	KMQHLEQTLNKELISKFLLNRRRRLAQIHIP;KMQHLEQTLSKELISKFLLNRRRRLAQIHFP	X;Oxidation (M);X;X;X;X;X;X;X;X;X;X;X;X;X;Acetyl (K);X;X;X;X;X;X;X;X;X;X;X;X;X;X;X	XXXXXXXXXXXPPPPPPPPPPXXXXXXXXXX	ELISK(1)FLLNR	5	2	-2.2254		5086;5087	5087	77719	0	0	32102	0	0
Q00896;P07758;P22599;Q00897;Q00898	147;147;147;147;147	Q00896;P22599;Q00897;Q00898	P22599	sp|Q00896|A1AT3_MOUSE Alpha-1-antitrypsin 1-3 OS=Mus musculus OX=10090 GN=Serpina1c PE=1 SV=2;sp|P07758|A1AT1_MOUSE Alpha-1-antitrypsin 1-1 OS=Mus musculus OX=10090 GN=Serpina1a PE=1 SV=4;sp|P22599|A1AT2_MOUSE Alpha-1-antitrypsin 1-2 OS=Mus musculus OX=100	1	0.00178606	75.404	1	K	TGNGLFVNNDLKLVEKFLEEAKNHYQAEVFS	X;X;X;X;X;X;X;X;X;X;X;X;X;X;X;Acetyl (K);X;X;X;X;X;X;X;X;X;X;X;X;X;X;X	XXXXXXXXXXXXPPPPPPPPPPXXXXXXXXX	LVEK(1)FLEEAK	4	2	-0.68412		18976;18977;18978;18979;18980	18980	78216	41069	0	17042	39640	21803
Q00896;P07758;P22599;Q00897;Q00898	181;181;181;181;181	Q00896;P22599;Q00897;Q00898	P22599	sp|Q00896|A1AT3_MOUSE Alpha-1-antitrypsin 1-3 OS=Mus musculus OX=10090 GN=Serpina1c PE=1 SV=2;sp|P07758|A1AT1_MOUSE Alpha-1-antitrypsin 1-1 OS=Mus musculus OX=10090 GN=Serpina1a PE=1 SV=4;sp|P22599|A1AT2_MOUSE Alpha-1-antitrypsin 1-2 OS=Mus musculus OX=100	1	0.000254106	123.89	1	K	AESEEAKKVINDFVEKGTQGKIVEAVKELDQ;AESEEAKKVINDFVEKGTQGKIVEAVKKLDQ;AESEEAKKVINDFVEKGTQGKIVEAVKKLEQ	X;X;X;X;X;X;X;X;X;X;X;X;X;X;X;Acetyl (K);X;X;X;X;X;X;X;X;X;X;X;X;X;X;X	XXXXXXXXPPPPPPPPPPPPPXXXXXXXXXX	VINDFVEK(1)GTQGK	8	2	0.3505		36545;36546;36547;36548;36549;36550	36550	90352	57686	37286	11736	35523	15517
P07901;P11499	112;107	P07901;P11499	P11499	sp|P07901|HS90A_MOUSE Heat shock protein HSP 90-alpha OS=Mus musculus OX=10090 GN=Hsp90aa1 PE=1 SV=4;sp|P11499|HS90B_MOUSE Heat shock protein HSP 90-beta OS=Mus musculus OX=10090 GN=Hsp90ab1 PE=1 SV=3	1	2.67772e-10	129.85	1	K	GMTKADLINNLGTIAKSGTKAFMEALQAGAD	X;X;X;X;X;X;X;X;X;X;X;X;X;X;X;Acetyl (K);X;X;X;X;X;X;X;X;X;X;X;X;X;X;X	XXXXPPPPPPPPPPPPPPPPXXXXXXXXXXX	ADLINNLGTIAK(1)SGTK	12	2	-0.33024		489	489	12391	0	0	0	0	0
P07901;P11499	293;284	P07901;P11499	P11499	sp|P07901|HS90A_MOUSE Heat shock protein HSP 90-alpha OS=Mus musculus OX=10090 GN=Hsp90aa1 PE=1 SV=4;sp|P11499|HS90B_MOUSE Heat shock protein HSP 90-beta OS=Mus musculus OX=10090 GN=Hsp90ab1 PE=1 SV=3	1	0.00305386	52.567	1	K	KKKIKEKYIDQEELNKTKPIWTRNPDDITNE;TKKIKEKYIDQEELNKTKPIWTRNPDDITQE	X;X;X;X;X;X;X;X;X;X;X;X;X;X;X;Acetyl (K);X;X;X;X;X;X;X;X;X;X;X;X;X;X;X	XXXXXXXPPPPPPPPPPPXXXXXXXXXXXXX	YIDQEELNK(1)TK	9	2	-7.32		39433	39433	0	0	0	14524	0	0
P08032	1905	P08032	P08032	sp|P08032|SPTA1_MOUSE Spectrin alpha chain, erythrocytic 1 OS=Mus musculus OX=10090 GN=Spta1 PE=1 SV=3	1	1.79232e-06	87.056	1	K	QNKDKISTKIQVLNEKTASLAKALAAWKSQL	X;X;X;X;X;X;X;X;X;X;X;X;X;X;X;Acetyl (K);X;X;X;X;X;X;X;X;X;X;X;X;X;X;X	XXXXXXXXXPPPPPPPPPPPPPXXXXXXXXX	IQVLNEK(1)TASLAK	7	2	1.7783		14105;14106;14107;14108;14109;14110	14110	22400	14670	19611	16941	21220	21629
P08207	54	P08207	P08207	sp|P08207|S10AA_MOUSE Protein S100-A10 OS=Mus musculus OX=10090 GN=S100a10 PE=1 SV=2	1	0.0250361	24.44	1	K	FPGFLENQKDPLAVDKIMKDLDQCRDGKVGF	X;X;X;X;X;X;X;X;X;X;X;X;X;X;X;Acetyl (K);X;X;X;X;X;X;X;X;X;X;X;X;X;X;X	XXXXXXXXXPPPPPPPPPPXXXXXXXXXXXX	DPLAVDK(1)IMK	7	2	0.34967		3974;3975	3975	7584.2	0	3284.1	0	0	0
P08207	23	P08207	P08207	sp|P08207|S10AA_MOUSE Protein S100-A10 OS=Mus musculus OX=10090 GN=S100a10 PE=1 SV=2	1	0.0108206	49.324	1	K	AMETMMLTFHRFAGDKDHLTKEDLRVLMERE	X;X;X;X;X;X;X;X;X;X;X;X;X;X;X;Acetyl (K);X;X;X;X;X;X;X;X;X;X;X;X;X;X;X	XXXXXXXXXXXPPPPPPPPPPXXXXXXXXXX	FAGDK(1)DHLTK	5	2	-1.6704		5614	5614	20525	0	0	0	0	0
P08228	123	P08228	P08228	sp|P08228|SODC_MOUSE Superoxide dismutase [Cu-Zn] OS=Mus musculus OX=10090 GN=Sod1 PE=1 SV=2	1	1.70965e-17	98.223	1	K	SGEHSIIGRTMVVHEKQDDLGKGGNEESTKT	X;X;X;X;X;X;X;X;X;X;X;X;X;X;X;Acetyl (K);X;X;X;X;X;X;X;X;X;X;X;X;X;X;X	XXXXXXXXXPPPPPPPPPPPPPPPPPPPPPX	TMVVHEK(1)QDDLGK	7	2	-0.1776		32135;32136;32137;32138;32139;32140;32146;32147;32148;32149;32150	32140	56977	63635	75331	67475	58214	46772
P08249	185	P08249	P08249	sp|P08249|MDHM_MOUSE Malate dehydrogenase, mitochondrial OS=Mus musculus OX=10090 GN=Mdh2 PE=1 SV=3	1	2.02316e-42	198.94	1	K	TTLDIVRANTFVAELKGLDPARVNVPVIGGH	X;X;X;X;X;X;X;X;X;X;X;X;X;X;X;Acetyl (K);X;X;X;X;X;X;X;X;X;X;X;X;X;X;X	XXXXXXXPPPPPPPPPPPPPPPXXXXXXXXX	ANTFVAELK(1)GLDPAR	9	2	0.71814		2025;2026;2027;2028;2029;2030	2030	2359700	4134600	4245400	1654600	3541700	3438000
P08249	328	P08249	P08249	sp|P08249|MDHM_MOUSE Malate dehydrogenase, mitochondrial OS=Mus musculus OX=10090 GN=Mdh2 PE=1 SV=3	1	1.80061e-09	129.06	2	K	EKMIAEAIPELKASIKKGEDFVKNMK_____	X;Acetyl (K);Oxidation (M);X;X;X;X;X;X;X;X;Acetyl (K);X;X;X;Acetyl (K);Acetyl (K);X;X;X;X;X;Acetyl (K);X;Oxidation (M);X;X;X;X;X;X	XXPPPPPPPPPPPPPPPPPPPPPXXXXXXXX	MIAEAIPELK(1)ASIK(1)K	14	2	-1.2881		2355;2356;2357;2358;2359;2360;19956;19957;19958;19959;19960	19960	502040	561470	608530	436410	466480	445270
P08249	329	P08249	P08249	sp|P08249|MDHM_MOUSE Malate dehydrogenase, mitochondrial OS=Mus musculus OX=10090 GN=Mdh2 PE=1 SV=3	1	1.80061e-09	129.06	2	K	KMIAEAIPELKASIKKGEDFVKNMK______	Acetyl (K);Oxidation (M);X;X;X;X;X;X;X;X;Acetyl (K);X;X;X;Acetyl (K);Acetyl (K);X;X;X;X;X;Acetyl (K);X;X;X;X;X;X;X;X;X	XXXXXXXXXXXPPPPPPPPPPPPPPXXXXXX	K(1)GEDFVK(1)NMK	1	2	0.45239		2355;2356;2357;2358;2359;2360;14979	14979	502040	561470	608530	436410	466480	445270
P08249	335	P08249	P08249	sp|P08249|MDHM_MOUSE Malate dehydrogenase, mitochondrial OS=Mus musculus OX=10090 GN=Mdh2 PE=1 SV=3	1	1.36623e-11	156.3	1;2	K	IPELKASIKKGEDFVKNMK____________	X;X;X;X;Acetyl (K);X;X;X;Acetyl (K);Acetyl (K);X;X;X;X;X;Acetyl (K);X;Oxidation (M);X;X;X;X;X;X;X;X;X;X;X;X;X	XXXXXXXXXPPPPPPPPPPXXXXXXXXXXXX	K(1)GEDFVK(1)NMK	7	2	0.45239		7719;7720;7721;7722;14969;14970;14971;14972;14973;14974;14975;14976;14977;14978;14979	14979	474840	457940	397420	359020	431870	453800
P08249	296	P08249	P08249	sp|P08249|MDHM_MOUSE Malate dehydrogenase, mitochondrial OS=Mus musculus OX=10090 GN=Mdh2 PE=1 SV=3	1	5.52014e-56	231.23	1	K	KETECTYFSTPLLLGKKGLEKNLGIGKITPF	X;X;X;X;X;X;X;X;X;X;X;X;X;X;X;Acetyl (K);Acetyl (K);X;X;X;Acetyl (K);X;X;X;X;X;Acetyl (K);X;X;X;X	XPPPPPPPPPPPPPPPPXXXXXXXXXXXXXX	ETECTYFSTPLLLGK(1)K	15	2	0.91695		5388;5389;5390;5391;5392;5393	5393	693820	866430	1341800	395760	483470	465300
P08249	297	P08249	P08249	sp|P08249|MDHM_MOUSE Malate dehydrogenase, mitochondrial OS=Mus musculus OX=10090 GN=Mdh2 PE=1 SV=3	1	0.000403436	89.96	2	K	ETECTYFSTPLLLGKKGLEKNLGIGKITPFE	X;X;X;X;X;X;X;X;X;X;X;X;X;X;X;Acetyl (K);X;X;X;Acetyl (K);X;X;X;X;X;Acetyl (K);X;X;X;X;X	XXXXXXXXXXXXXXXPPPPPPPPPPPXXXXX	K(1)GLEK(1)NLGIGK	1	2	0.70653		14996;14997;14998;14999;15000;15001;15002;15003;15004	15004	99866	93198	0	73316	97729	80337
P08249	301	P08249	P08249	sp|P08249|MDHM_MOUSE Malate dehydrogenase, mitochondrial OS=Mus musculus OX=10090 GN=Mdh2 PE=1 SV=3	1	1.59229e-17	98.199	1;2	K	TYFSTPLLLGKKGLEKNLGIGKITPFEEKMI	X;X;X;X;X;X;X;X;X;X;Acetyl (K);Acetyl (K);X;X;X;Acetyl (K);X;X;X;X;X;Acetyl (K);X;X;X;X;X;X;Acetyl (K);Oxidation (M);X	XXXXXXXXXXXPPPPPPPPPPPPPPPPPPXX	K(1)GLEK(1)NLGIGK	5	2	0.70653		8627;8628;8629;8630;8631;8632;8633;8634;8635;8636;8637;8638;8639;8640;8641;14990;14991;14992;14993;14994;14995;14996;14997;14998;14999;15000;15001;15002;15003;15004	15004	7164500	7058500	7811000	6729100	6930800	6645100
P08249	307	P08249	P08249	sp|P08249|MDHM_MOUSE Malate dehydrogenase, mitochondrial OS=Mus musculus OX=10090 GN=Mdh2 PE=1 SV=3	1	1.03765e-41	165.23	1;2	K	LLLGKKGLEKNLGIGKITPFEEKMIAEAIPE	X;X;X;X;Acetyl (K);X;X;X;X;Acetyl (K);X;X;X;X;X;Acetyl (K);X;X;X;X;X;X;Acetyl (K);Oxidation (M);X;X;X;X;X;X;X	XXXXXXPPPPPPPPPPPPPPPPPXXXXXXXX	NLGIGK(1)ITPFEEK	6	2	0.46152		8636;8637;8638;8639;8640;8641;21209;21210;21211;21212;21213;21214	21214	1831800	2469100	2274600	2143900	1967000	2148000
P08249	314	P08249	P08249	sp|P08249|MDHM_MOUSE Malate dehydrogenase, mitochondrial OS=Mus musculus OX=10090 GN=Mdh2 PE=1 SV=3	1	1.18366e-47	223.23	1	K	LEKNLGIGKITPFEEKMIAEAIPELKASIKK	X;X;Acetyl (K);X;X;X;X;X;X;X;X;X;X;X;X;Acetyl (K);Oxidation (M);X;X;X;X;X;X;X;X;Acetyl (K);X;X;X;Acetyl (K);Acetyl (K)	XXXXXXXXXPPPPPPPPPPPPPPPPPXXXXX	ITPFEEK(1)MIAEAIPELK	7	2	-2.4487		14385;14386;14387;14388;14389;14390;14391;14392;14393;14394;14395;14396;14397;14398;14399;14400;14401	14401	667800	2750600	4471700	2489000	2835000	2665500
P08249	91	P08249	P08249	sp|P08249|MDHM_MOUSE Malate dehydrogenase, mitochondrial OS=Mus musculus OX=10090 GN=Mdh2 PE=1 SV=3	1	1.93818e-21	124.74	1	K	NVKGYLGPEQLPDCLKGCDVVVIPAGVPRKP	X;X;X;X;X;X;X;X;X;X;X;X;X;X;X;Acetyl (K);X;X;X;X;X;X;X;X;X;X;X;X;X;X;X	XXXPPPPPPPPPPPPPPPPPPPPPPPPPPXX	GYLGPEQLPDCLK(1)GCDVVVIPAGVPR	13	3	-2.646		9901;9902;9903;9904;9905	9905	0	8687.7	39390	6595.5	17009	14920
P08249	239	P08249	P08249	sp|P08249|MDHM_MOUSE Malate dehydrogenase, mitochondrial OS=Mus musculus OX=10090 GN=Mdh2 PE=1 SV=3	1	3.46428e-16	168.79	1	K	ATLTGRIQEAGTEVVKAKAGAGSATLSMAYA	X;X;X;X;X;X;X;X;X;X;X;X;X;X;X;Acetyl (K);X;X;X;X;X;X;X;X;X;X;X;Oxidation (M);X;X;X	XXXXXXPPPPPPPPPPPPXXXXXXXXXXXXX	IQEAGTEVVK(1)AK	10	2	0.9747		14027;14028;14029;14030;14031;14032	14032	1663500	1450500	1130000	710940	1006600	785330
P08249	324	P08249	P08249	sp|P08249|MDHM_MOUSE Malate dehydrogenase, mitochondrial OS=Mus musculus OX=10090 GN=Mdh2 PE=1 SV=3	1	6.6453e-08	168.19	1;2	K	TPFEEKMIAEAIPELKASIKKGEDFVKNMK_	X;X;X;X;X;X;Oxidation (M);X;X;X;X;X;X;X;X;Acetyl (K);X;X;X;Acetyl (K);Acetyl (K);X;X;X;X;X;Acetyl (K);X;Oxidation (M);X;X	XXXXXXPPPPPPPPPPPPPPPXXXXXXXXXX	MIAEAIPELK(1)ASIK(1)K	10	2	-1.2881		19942;19943;19944;19945;19946;19947;19948;19949;19950;19951;19952;19953;19954;19955;19956;19957;19958;19959;19960	19960	10267000	13188000	15769000	10632000	14170000	14116000
P09411;P09041	156;156	P09411	P09411	sp|P09411|PGK1_MOUSE Phosphoglycerate kinase 1 OS=Mus musculus OX=10090 GN=Pgk1 PE=1 SV=4;sp|P09041|PGK2_MOUSE Phosphoglycerate kinase 2 OS=Mus musculus OX=10090 GN=Pgk2 PE=1 SV=4	1	1.93395e-25	128.75	1	K	KAEPAKIDAFRASLSKLGDVYVNDAFGTAHR	X;X;X;X;X;X;X;X;X;X;X;X;X;X;X;Acetyl (K);X;X;X;X;X;X;X;X;X;X;X;X;X;X;X	XXXXXXXXXXXPPPPPPPPPPPPPPPPPPPP	ASLSK(1)LGDVYVNDAFGTAHR	5	2	-1.1157		2371;2372;2373;2374;2375;2376;2377	2377	23476	54383	59821	0	23493	15097
P09411;P09041	131;131	P09411	P09411	sp|P09411|PGK1_MOUSE Phosphoglycerate kinase 1 OS=Mus musculus OX=10090 GN=Pgk1 PE=1 SV=4;sp|P09041|PGK2_MOUSE Phosphoglycerate kinase 2 OS=Mus musculus OX=10090 GN=Pgk2 PE=1 SV=4	1	0.00250806	87.028	1	K	VILLENLRFHVEEEGKGKDASGNKVKAEPAK	X;X;X;X;X;X;X;X;X;X;X;X;X;X;X;Acetyl (K);X;X;X;X;X;X;X;X;X;X;X;X;X;X;X	XXXXXXXXPPPPPPPPPPXXXXXXXXXXXXX	FHVEEEGK(1)GK	8	2	0.28554		6320;6321;6322;6323;6324;6325	6325	68501	86706	61538	81600	59036	47883
P09411	291	P09411	P09411	sp|P09411|PGK1_MOUSE Phosphoglycerate kinase 1 OS=Mus musculus OX=10090 GN=Pgk1 PE=1 SV=4	1	1.26117e-16	114.08	1	K	NGVKITLPVDFVTADKFDENAKTGQATVASG	X;X;X;X;X;X;X;X;X;X;X;X;X;X;X;Acetyl (K);X;X;X;X;X;X;X;X;X;X;X;X;X;X;X	XXXXPPPPPPPPPPPPPPPPPPXXXXXXXXX	ITLPVDFVTADK(1)FDENAK	12	2	-0.95477		14373;14374;14375;14376;14377;14378	14378	15201	24463	43686	20055	21384	18353
P09411	11	P09411	P09411	sp|P09411|PGK1_MOUSE Phosphoglycerate kinase 1 OS=Mus musculus OX=10090 GN=Pgk1 PE=1 SV=4	1	0.030646	15.333	1	K	_____MSLSNKLTLDKLDVKGKRVVMRVDFN	X;X;X;X;X;X;X;X;X;X;X;X;X;X;X;Acetyl (K);X;X;X;X;X;X;X;X;X;X;X;X;X;X;X	XXXXXXXXXXXPPPPPPPPPXXXXXXXXXXX	LTLDK(1)LDVK	5	2	-1.7342		18831;18832;18833	18833	93936	77298	76583	0	0	0
P09411	75	P09411	P09411	sp|P09411|PGK1_MOUSE Phosphoglycerate kinase 1 OS=Mus musculus OX=10090 GN=Pgk1 PE=1 SV=4	1	1.01706e-14	79.725	1	K	LMSHLGRPDGVPMPDKYSLEPVAAELKSLLG	X;X;X;X;X;X;X;X;X;X;X;X;X;X;X;Acetyl (K);X;X;X;X;X;X;X;X;X;X;X;X;X;X;X	XXXXXXXPPPPPPPPPPPPPPPPPPPPXXXX	PDGVPMPDK(1)YSLEPVAAELK	9	2	0.018416		21989;21990;21991;21992	21992	164640	0	240980	193390	217610	0
P09411	361	P09411	P09411	sp|P09411|PGK1_MOUSE Phosphoglycerate kinase 1 OS=Mus musculus OX=10090 GN=Pgk1 PE=1 SV=4	1	8.70378e-07	148.87	1	K	EAFARGTKSLMDEVVKATSRGCITIIGGGDT	X;X;X;X;X;X;X;X;X;X;X;X;X;X;X;Acetyl (K);X;X;X;X;X;X;X;X;X;X;X;X;X;X;X	XXXXXXXXPPPPPPPPPPPPXXXXXXXXXXX	SLMDEVVK(1)ATSR	8	2	-1.8661		26179;26180;26181;26182;26183;26184	26184	157360	158700	127770	87171	82880	75923
P09411	220	P09411	P09411	sp|P09411|PGK1_MOUSE Phosphoglycerate kinase 1 OS=Mus musculus OX=10090 GN=Pgk1 PE=1 SV=4	1	6.4182e-23	133.77	1	K	ERPFLAILGGAKVADKIQLINNMLDKVNEMI	X;X;X;X;X;X;X;X;X;X;X;X;X;X;X;Acetyl (K);X;X;X;X;X;X;Oxidation (M);X;X;X;X;X;X;X;X	XXXXXXXXXXXXPPPPPPPPPPPPPPXXXXX	VADK(1)IQLINNMLDK	4	2	-0.52129		35178;35179;35180;35181;35182;35183;35184;35185	35185	53913	80439	212000	64188	76589	63223
P09411;P09041	30;30	P09411	P09411	sp|P09411|PGK1_MOUSE Phosphoglycerate kinase 1 OS=Mus musculus OX=10090 GN=Pgk1 PE=1 SV=4;sp|P09041|PGK2_MOUSE Phosphoglycerate kinase 2 OS=Mus musculus OX=10090 GN=Pgk2 PE=1 SV=4	1	1.15109e-72	202.4	1	K	KGKRVVMRVDFNVPMKNNQITNNQRIKAAVP	X;X;X;X;X;X;X;X;X;X;X;X;X;X;X;Acetyl (K);X;X;X;X;X;X;X;X;X;X;X;X;X;X;X	XXXXXXXXPPPPPPPPPPPPPPPPPXXXXXX	VDFNVPMK(1)NNQITNNQR	8	2	-2.2626		35626;35627;35628;35629;35630;35631	35631	408350	389520	410370	339140	317090	322820
P09542	79	P09542	P09542	sp|P09542|MYL3_MOUSE Myosin light chain 3 OS=Mus musculus OX=10090 GN=Myl3 PE=1 SV=4	1	2.04693e-07	118.55	1	K	KEAFLLFDRTPKGEMKITYGQCGDVLRALGQ	X;X;X;X;X;X;X;X;X;X;X;X;X;X;X;Acetyl (K);X;X;X;X;X;X;X;X;X;X;X;X;X;X;X	XXXXXXXXXXXXPPPPPPPPPPPPPPPXXXX	GEMK(1)ITYGQCGDVLR	4	2	0.23241		7803;7804;7805;7806	7806	55551	23834	19350	0	16113	0
P09671	130	P09671	P09671	sp|P09671|SODM_MOUSE Superoxide dismutase [Mn], mitochondrial OS=Mus musculus OX=10090 GN=Sod2 PE=1 SV=3	1	1.89642e-31	186.46	1	K	GELLEAIKRDFGSFEKFKEKLTAVSVGVQGS	X;X;X;X;X;X;X;Acetyl (K);X;X;X;X;X;X;X;Acetyl (K);X;X;X;X;X;X;X;X;X;X;X;X;X;X;X	XXXXXXXXPPPPPPPPPPPPXXXXXXXXXXX	RDFGSFEK(1)FK	8	2	0.4906		3509;3510;3511;3512;3513;3514;3515;3516;3517;3518;3519;3520;24163;24164;24165;24166;24167	24167	248940	159730	379200	172490	254130	198660
P09671	108	P09671	P09671	sp|P09671|SODM_MOUSE Superoxide dismutase [Mn], mitochondrial OS=Mus musculus OX=10090 GN=Sod2 PE=1 SV=3	1	1.13162e-09	73.662	1	K	GGHINHTIFWTNLSPKGGGEPKGELLEAIKR	X;X;X;X;X;X;X;X;X;X;X;X;X;X;X;Acetyl (K);X;X;X;X;X;Acetyl (K);X;X;X;X;X;X;X;Acetyl (K);X	PPPPPPPPPPPPPPPPPPPPPPXXXXXXXXX	FNGGGHINHTIFWTNLSPK(1)GGGEPK	19	3	-2.4545		6828;6829;6830	6830	0	12609	6067.3	10272	0	0
P09671	114	P09671	P09671	sp|P09671|SODM_MOUSE Superoxide dismutase [Mn], mitochondrial OS=Mus musculus OX=10090 GN=Sod2 PE=1 SV=3	1	1.4349e-05	47.607	2	K	TIFWTNLSPKGGGEPKGELLEAIKRDFGSFE	X;X;X;X;X;X;X;X;X;X;X;X;X;X;X;Acetyl (K);X;X;X;X;X;X;X;Acetyl (K);X;X;X;X;X;X;X	XXXXXXXXXXPPPPPPPPPPPPPPPXXXXXX	GGGEPK(1)GELLEAIK(1)R	6	2	-2.7754		8016	8016	0	0	10159	0	0	0
P09671	122	P09671	P09671	sp|P09671|SODM_MOUSE Superoxide dismutase [Mn], mitochondrial OS=Mus musculus OX=10090 GN=Sod2 PE=1 SV=3	1	1.4349e-05	60.342	1;2	K	PKGGGEPKGELLEAIKRDFGSFEKFKEKLTA	X;Acetyl (K);X;X;X;X;X;Acetyl (K);X;X;X;X;X;X;X;Acetyl (K);X;X;X;X;X;X;X;Acetyl (K);X;X;X;X;X;X;X	XXPPPPPPPPPPPPPPPXXXXXXXXXXXXXX	GGGEPK(1)GELLEAIK(1)R	14	2	-2.7754		7778;7779;7780;7781;8016	8016	3270300	0	4012600	3186200	3301500	0
P09671	68	P09671	P09671	sp|P09671|SODM_MOUSE Superoxide dismutase [Mn], mitochondrial OS=Mus musculus OX=10090 GN=Sod2 PE=1 SV=3	1	1.00565e-39	196.42	1	K	KHHAAYVNNLNATEEKYHEALAKGDVTTQVA	X;X;X;X;X;X;X;X;X;X;X;X;X;X;X;Acetyl (K);X;X;X;X;X;X;Acetyl (K);X;X;X;X;X;X;X;X	XPPPPPPPPPPPPPPPPPPPPPPPPPPPPPP	HHAAYVNNLNATEEK(1)YHEALAK	15	3	1.6858		10685;10686;10687;10688;10689;10690;10691;10692;10693;10694;10695;10696;10697;10698;10703;10704	10698	622410	733780	1037900	743670	933850	760960
P09671	75	P09671	P09671	sp|P09671|SODM_MOUSE Superoxide dismutase [Mn], mitochondrial OS=Mus musculus OX=10090 GN=Sod2 PE=1 SV=3	1	6.38689e-38	140.87	1	K	NNLNATEEKYHEALAKGDVTTQVALQPALKF	X;X;X;X;X;X;X;X;X;X;X;X;X;X;X;Acetyl (K);X;X;X;X;X;X;X;X;X;X;X;X;X;X;X	PPPPPPPPPPPPPPPPPPPPPPPPPPPPPPX	YHEALAK(1)GDVTTQVALQPALK	7	3	-1.4636		10702;10704;39311;39312;39313;39314;39315;39316;39317;39318;39319;39320;39321;39322;39323;39324;39325;39326;39327;39328	39328	93319	120980	167490	132690	163430	161560
P09813	67	P09813	P09813	sp|P09813|APOA2_MOUSE Apolipoprotein A-II OS=Mus musculus OX=10090 GN=Apoa2 PE=1 SV=2	1	5.24891e-05	61.236	1	K	AKTSEIQSQAKAYFEKTHEQLTPLVRSAGTS	X;X;X;X;X;X;X;X;X;X;X;X;X;X;X;Acetyl (K);X;X;X;X;X;X;X;X;X;X;X;X;X;X;X	XXXXXXXXXXXPPPPPPPPPPPPPPPXXXXX	AYFEK(1)THEQLTPLVR	5	2	-2.2208		2930;2931;2932;2933;2934	2934	58523	32259	0	8446.1	34857	11981
Q3THW5;P0C0S6	8;8	Q3THW5	Q3THW5	sp|Q3THW5|H2AV_MOUSE Histone H2A.V OS=Mus musculus OX=10090 GN=H2az2 PE=1 SV=3;sp|P0C0S6|H2AZ_MOUSE Histone H2A.Z OS=Mus musculus OX=10090 GN=H2az1 PE=1 SV=2	1	0.0377087	56.867	2	K	________MAGGKAGKDSGKAKAKAVSRSQR	X;X;X;X;X;X;X;X;X;X;X;X;X;X;X;Acetyl (K);X;X;X;Acetyl (K);X;X;X;X;X;X;X;X;X;X;X	XXXXXXXXXXXXXPPPPPPPPPXXXXXXXXX	AGK(1)DSGK(1)AK	3	2	-0.70077		950;951	951	0	0	0	37606	75745	0
Q3THW5;P0C0S6	12;12	Q3THW5	Q3THW5	sp|Q3THW5|H2AV_MOUSE Histone H2A.V OS=Mus musculus OX=10090 GN=H2az2 PE=1 SV=3;sp|P0C0S6|H2AZ_MOUSE Histone H2A.Z OS=Mus musculus OX=10090 GN=H2az1 PE=1 SV=2	1	0.0377087	56.867	2	K	____MAGGKAGKDSGKAKAKAVSRSQRAGLQ	X;X;X;X;X;X;X;X;X;X;X;Acetyl (K);X;X;X;Acetyl (K);X;X;X;X;X;X;X;X;X;X;X;X;X;X;X	XXXXXXXXXPPPPPPPPPXXXXXXXXXXXXX	AGK(1)DSGK(1)AK	7	2	-0.70077		950;951	951	0	0	0	37606	75745	0
P0DOV1;Q8CGE8;P0DOV2	210;189;210	P0DOV1	P0DOV1	sp|P0DOV1|IFI5B_MOUSE Interferon-activable protein 205-B OS=Mus musculus OX=10090 GN=Mnda PE=1 SV=1;sp|Q8CGE8|IFI5A_MOUSE Interferon-activable protein 205-A OS=Mus musculus OX=10090 GN=Ifi205a PE=2 SV=1;sp|P0DOV2|IFI4_MOUSE Interferon-activable protein 204	1	8.80721e-10	129.84	1	K	SSSSASSNILSAKNQKSQPQNQNIPRGAVLH	X;X;X;X;X;X;X;X;X;X;X;X;X;X;X;Acetyl (K);X;X;X;X;X;X;X;X;X;X;X;X;X;X;X	XXXXXXXXXXXXXPPPPPPPPPPPPPXXXXX	NQK(1)SQPQNQNIPR	3	2	-1.7731		21491;21492;21493;21494;21495	21495	11659	6464	9363.8	8932.6	4125.2	0
P0DP28;P0DP27;P0DP26	22;22;22	P0DP28	P0DP28	sp|P0DP28|CALM3_MOUSE Calmodulin-3 OS=Mus musculus OX=10090 GN=Calm3 PE=1 SV=1;sp|P0DP27|CALM2_MOUSE Calmodulin-2 OS=Mus musculus OX=10090 GN=Calm2 PE=1 SV=1;sp|P0DP26|CALM1_MOUSE Calmodulin-1 OS=Mus musculus OX=10090 GN=Calm1 PE=1 SV=1	1	3.92285e-38	198.79	1	K	EEQIAEFKEAFSLFDKDGDGTITTKELGTVM	X;X;X;X;X;X;X;X;X;X;X;X;X;X;X;Acetyl (K);X;X;X;X;X;X;X;X;X;X;X;X;X;X;X	XXXXXXXXPPPPPPPPPPPPPPPPPXXXXXX	EAFSLFDK(1)DGDGTITTK	8	2	-2.2334		4307;4308;4309;4310;4311;4312	4312	134000	173460	264910	162160	204100	160630
P0DP28;P0DP27;P0DP26	95;95;95	P0DP28	P0DP28	sp|P0DP28|CALM3_MOUSE Calmodulin-3 OS=Mus musculus OX=10090 GN=Calm3 PE=1 SV=1;sp|P0DP27|CALM2_MOUSE Calmodulin-2 OS=Mus musculus OX=10090 GN=Calm2 PE=1 SV=1;sp|P0DP26|CALM1_MOUSE Calmodulin-1 OS=Mus musculus OX=10090 GN=Calm1 PE=1 SV=1	1	8.28895e-09	126.72	1	K	TDSEEEIREAFRVFDKDGNGYISAAELRHVM	X;X;X;X;X;X;X;X;X;X;X;X;X;X;X;Acetyl (K);X;X;X;X;X;X;X;X;X;X;X;X;X;X;X	XXXXXXXXXXXXPPPPPPPPPPPPPPPPXXX	VFDK(1)DGNGYISAAELR	4	2	-4.1546		35989;35990;35991;35992;35993	35993	32438	0	71135	28453	66225	16636
P10107	312	P10107	P10107	sp|P10107|ANXA1_MOUSE Annexin A1 OS=Mus musculus OX=10090 GN=Anxa1 PE=1 SV=2	1	6.28269e-16	182.12	1	K	IRIMVSRSEIDMNEIKVFYQKKYGISLCQAI	X;X;X;X;X;X;X;X;X;X;X;X;X;X;X;Acetyl (K);X;X;X;X;X;X;X;X;X;X;X;X;X;X;X	XXXXXXXPPPPPPPPPPPPPPXXXXXXXXXX	SEIDMNEIK(1)VFYQK	9	2	1.226		24894;24895;24896;24897	24897	0	7196.5	16044	8526.4	6781	0
P10126;P62631	44;44	P10126;P62631	P62631	sp|P10126|EF1A1_MOUSE Elongation factor 1-alpha 1 OS=Mus musculus OX=10090 GN=Eef1a1 PE=1 SV=3;sp|P62631|EF1A2_MOUSE Elongation factor 1-alpha 2 OS=Mus musculus OX=10090 GN=Eef1a2 PE=1 SV=1	1	0.000584875	69.406	1	K	YKCGGIDKRTIEKFEKEAAEMGKGSFKYAWV	X;X;X;X;X;X;X;X;X;X;X;X;X;X;X;Acetyl (K);X;X;X;X;X;X;X;X;X;X;X;X;X;X;X	XXXXXXXXXXXXXPPPPPPPPPPXXXXXXXX	FEK(1)EAAEMGK	3	2	1.7275		5900;5901;5902;5903;5904	5904	110940	121950	0	25653	41343	20210
P10605	220	P10605	P10605	sp|P10605|CATB_MOUSE Cathepsin B OS=Mus musculus OX=10090 GN=Ctsb PE=1 SV=2	1	7.22789e-06	121.05	1	K	PRCNKSCEAGYSPSYKEDKHFGYTSYSVSNS	X;X;X;X;X;X;X;X;X;X;X;X;X;X;X;Acetyl (K);X;X;X;X;X;X;X;X;X;X;X;X;X;X;X	XXXXXPPPPPPPPPPPPPPXXXXXXXXXXXX	SCEAGYSPSYK(1)EDK	11	2	-1.4721		24555	24555	0	12091	0	0	0	0
P10630;Q91VC3;P60843	55;60;54	P10630;P60843	P60843	sp|P10630|IF4A2_MOUSE Eukaryotic initiation factor 4A-II OS=Mus musculus OX=10090 GN=Eif4a2 PE=1 SV=2;sp|Q91VC3|IF4A3_MOUSE Eukaryotic initiation factor 4A-III OS=Mus musculus OX=10090 GN=Eif4a3 PE=1 SV=3;sp|P60843|IF4A1_MOUSE Eukaryotic initiation factor	1	0.000633903	53.394	1	K	LKESLLRGIYAYGFEKPSAIQQRAIIPCIKG;LSESLLRGIYAYGFEKPSAIQQRAILPCIKG	X;X;X;X;X;X;X;X;X;X;X;X;X;X;X;Acetyl (K);X;X;X;X;X;X;X;X;X;X;X;X;X;X;X	XXXXXXXPPPPPPPPPPPPPPPPXXXXXXXX	GIYAYGFEK(1)PSAIQQR	9	2	-0.27357		8505	8505	0	0	7048.7	0	0	0
P10630;P60843	292;291	P10630;P60843	P60843	sp|P10630|IF4A2_MOUSE Eukaryotic initiation factor 4A-II OS=Mus musculus OX=10090 GN=Eif4a2 PE=1 SV=2;sp|P60843|IF4A1_MOUSE Eukaryotic initiation factor 4A-I OS=Mus musculus OX=10090 GN=Eif4a1 PE=1 SV=1	1	0.00324299	68.31	1	K	VIFINTRRKVDWLTEKMHARDFTVSAMHGDM;VIFLNTRRKVDWLTEKMHARDFTVSALHGDM	X;X;X;X;X;X;X;X;X;X;X;X;X;X;X;Acetyl (K);X;X;X;X;X;X;X;X;X;X;X;X;X;X;X	XXXXXXXXXPPPPPPPPPPPXXXXXXXXXXX	VDWLTEK(1)MHAR	7	2	0.92731		35718;35719	35719	13382	10475	0	0	0	0
P10649	144	P10649	P10649	sp|P10649|GSTM1_MOUSE Glutathione S-transferase Mu 1 OS=Mus musculus OX=10090 GN=Gstm1 PE=1 SV=2	1	0.00241472	91.165	1	K	KTIPEKMKLYSEFLGKRPWFAGDKVTYVDFL	X;X;X;X;X;X;X;X;X;X;X;X;X;X;X;Acetyl (K);X;X;X;X;X;X;X;X;X;X;X;X;X;X;X	XXXXXXXXPPPPPPPPPXXXXXXXXXXXXXX	LYSEFLGK(1)R	8	2	0.94617		19381;19382;19383;19384;19385;19386	19386	152630	126380	108290	90844	108450	100740
P10649;P15626	136;136	P10649;P15626	P10649	sp|P10649|GSTM1_MOUSE Glutathione S-transferase Mu 1 OS=Mus musculus OX=10090 GN=Gstm1 PE=1 SV=2;sp|P15626|GSTM2_MOUSE Glutathione S-transferase Mu 2 OS=Mus musculus OX=10090 GN=Gstm2 PE=1 SV=2	1	0.0017764	96.01	1	K	EKKKPEYLEGLPEKMKLYSEFLGKQPWFAGN;EKQKPEFLKTIPEKMKLYSEFLGKRPWFAGD	X;X;X;X;X;X;X;X;X;X;X;X;X;X;X;Acetyl (K);X;X;X;X;X;X;X;Acetyl (K);X;X;X;X;X;X;X	XXXXXXXXXXXXXXPPPPPPPPPPXXXXXXX	MK(1)LYSEFLGK	2	2	-1.1892		20007;20008;20009;20010;20011;20012;20013	20013	119250	123740	112560	90098	105680	86660
P10649	31	P10649	P10649	sp|P10649|GSTM1_MOUSE Glutathione S-transferase Mu 1 OS=Mus musculus OX=10090 GN=Gstm1 PE=1 SV=2	1	1.94469e-05	88.891	1	K	PIRMLLEYTDSSYDEKRYTMGDAPDFDRSQW	X;X;X;X;X;X;X;X;X;X;X;X;X;X;X;Acetyl (K);X;X;X;X;X;X;X;X;X;X;X;X;X;X;X	XXXPPPPPPPPPPPPPPXXXXXXXXXXXXXX	MLLEYTDSSYDEK(1)R	13	2	-1.7936		20102;20103;20104;20105	20105	30008	0	0	13719	21901	7858.6
P10649	50	P10649	P10649	sp|P10649|GSTM1_MOUSE Glutathione S-transferase Mu 1 OS=Mus musculus OX=10090 GN=Gstm1 PE=1 SV=2	1	0.0195017	55.614	1	K	MGDAPDFDRSQWLNEKFKLGLDFPNLPYLID	X;X;X;X;X;X;X;X;X;X;X;X;X;X;X;Acetyl (K);X;X;X;X;X;X;X;X;X;X;X;X;X;X;X	XXXXXXXXXPPPPPPPPPXXXXXXXXXXXXX	SQWLNEK(1)FK	7	2	0.48436		26852;26853	26853	30933	0	0	0	0	1730.2
Q6ZWY9;P10853;Q8CGP1;P10854;Q8CGP2;Q8CGP0;Q64524	21;21;21;21;21;21;21	Q6ZWY9	Q6ZWY9	sp|Q6ZWY9|H2B1C_MOUSE Histone H2B type 1-C/E/G OS=Mus musculus OX=10090 GN=H2bc4 PE=1 SV=3;sp|P10853|H2B1F_MOUSE Histone H2B type 1-F/J/L OS=Mus musculus OX=10090 GN=H2bc7 PE=1 SV=2;sp|Q8CGP1|H2B1K_MOUSE Histone H2B type 1-K OS=Mus musculus OX=10090 GN=H2b	1	1.89839e-15	37.317	2	K	KSAPAPKKGSKKAVTKAQKKDGKKRKRSRKE	Acetyl (K);X;X;X;X;X;Acetyl (K);X;X;X;X;Acetyl (K);X;X;X;Acetyl (K);X;X;Acetyl (K);X;X;X;X;X;X;X;X;X;X;X;X	XXXXXXXXXXXPPPPPPPPPXXXXXXXXXXX	K(1)AVTK(1)AQK	5	2	-0.41277		2815;2816;2817;2818;2819;2820;14780;14781;14782;14783;14784;14785	14785	244490	120080	170670	118080	136250	110920
Q6ZWY9;P10853;Q8CGP1;P10854;Q8CGP2;Q8CGP0;Q64524	24;24;24;24;24;24;24	Q6ZWY9	Q6ZWY9	sp|Q6ZWY9|H2B1C_MOUSE Histone H2B type 1-C/E/G OS=Mus musculus OX=10090 GN=H2bc4 PE=1 SV=3;sp|P10853|H2B1F_MOUSE Histone H2B type 1-F/J/L OS=Mus musculus OX=10090 GN=H2bc7 PE=1 SV=2;sp|Q8CGP1|H2B1K_MOUSE Histone H2B type 1-K OS=Mus musculus OX=10090 GN=H2b	1	0.000112844	28.232	2	K	PAPKKGSKKAVTKAQKKDGKKRKRSRKESYS	X;X;X;Acetyl (K);X;X;X;X;X;X;X;X;Acetyl (K);X;X;Acetyl (K);X;X;X;X;X;X;X;X;X;X;X;X;X;X;X	XXXXXXXXXPPPPPPPPXXXXXXXXXXXXXX	AVTK(1)AQK(1)K	7	2	-1.3206		2815;2816;2817;2818;2819;2820	2820	244490	120080	170670	118080	136250	110920
Q6ZWY9;P10853;Q8CGP1;P10854;Q8CGP2;Q8CGP0;Q64524	17;17;17;17;17;17;17	Q6ZWY9	Q6ZWY9	sp|Q6ZWY9|H2B1C_MOUSE Histone H2B type 1-C/E/G OS=Mus musculus OX=10090 GN=H2bc4 PE=1 SV=3;sp|P10853|H2B1F_MOUSE Histone H2B type 1-F/J/L OS=Mus musculus OX=10090 GN=H2bc7 PE=1 SV=2;sp|Q8CGP1|H2B1K_MOUSE Histone H2B type 1-K OS=Mus musculus OX=10090 GN=H2b	1	1.89839e-15	37.317	2	K	PEPAKSAPAPKKGSKKAVTKAQKKDGKKRKR	X;X;X;X;Acetyl (K);X;X;X;X;X;Acetyl (K);X;X;X;X;Acetyl (K);X;X;X;Acetyl (K);X;X;Acetyl (K);X;X;X;X;X;X;X;X	XXXXXXXXXXXXXXXPPPPPPPPXXXXXXXX	K(1)AVTK(1)AQK	1	2	-0.41277		14780;14781;14782;14783;14784;14785	14785	706890	493310	569130	523690	608460	485270
Q6ZWY9;P10853;Q8CGP1;Q64478;P10854;Q8CGP2;Q8CGP0;Q64524;Q64475;Q9D2U9;P70696;Q64525	109;109;109;109;109;109;109;109;109;109;110;109	Q6ZWY9;Q64475;Q64525	Q6ZWY9	sp|Q6ZWY9|H2B1C_MOUSE Histone H2B type 1-C/E/G OS=Mus musculus OX=10090 GN=H2bc4 PE=1 SV=3;sp|P10853|H2B1F_MOUSE Histone H2B type 1-F/J/L OS=Mus musculus OX=10090 GN=H2bc7 PE=1 SV=2;sp|Q8CGP1|H2B1K_MOUSE Histone H2B type 1-K OS=Mus musculus OX=10090 GN=H2b	1	2.00654e-13	105.09	1	K	EIQTAVRLLLPGELAKHAVSEGTKAVTKYTS	X;X;X;X;X;X;X;X;X;X;X;X;X;X;X;Acetyl (K);X;X;X;X;X;X;X;X;X;X;X;X;X;X;X	XXXXXXXPPPPPPPPPPPPPPPPPXXXXXXX	LLLPGELAK(1)HAVSEGTK	9	2	-1.9902		17666;17667;17668;17669;17670;17671	17671	60525	38405	74306	37677	53511	25596
Q6ZWY9;P10853;Q8CGP1;Q64478	6;6;6;6	Q6ZWY9	Q6ZWY9	sp|Q6ZWY9|H2B1C_MOUSE Histone H2B type 1-C/E/G OS=Mus musculus OX=10090 GN=H2bc4 PE=1 SV=3;sp|P10853|H2B1F_MOUSE Histone H2B type 1-F/J/L OS=Mus musculus OX=10090 GN=H2bc7 PE=1 SV=2;sp|Q8CGP1|H2B1K_MOUSE Histone H2B type 1-K OS=Mus musculus OX=10090 GN=H2b	1	0.00110199	90.539	1;2	K	__________MPEPAKSAPAPKKGSKKAVTK	X;X;X;X;X;X;X;X;X;X;X;X;X;X;X;Acetyl (K);X;X;X;X;X;Acetyl (K);X;X;X;X;Acetyl (K);X;X;X;Acetyl (K)	XXXXXXXXXXXPPPPPPPPPPPPXXXXXXXX	PEPAK(1)SAPAPK(1)K	5	2	0.63797		22031;22032;22033;22034;22035	22035	580560	0	465440	447770	28498	393080
Q6ZWY9;P10853;Q8CGP1;Q64478	12;12;12;12	Q6ZWY9	Q6ZWY9	sp|Q6ZWY9|H2B1C_MOUSE Histone H2B type 1-C/E/G OS=Mus musculus OX=10090 GN=H2bc4 PE=1 SV=3;sp|P10853|H2B1F_MOUSE Histone H2B type 1-F/J/L OS=Mus musculus OX=10090 GN=H2bc7 PE=1 SV=2;sp|Q8CGP1|H2B1K_MOUSE Histone H2B type 1-K OS=Mus musculus OX=10090 GN=H2b	1	0.0325617	52.191	2	K	____MPEPAKSAPAPKKGSKKAVTKAQKKDG	X;X;X;X;X;X;X;X;X;Acetyl (K);X;X;X;X;X;Acetyl (K);X;X;X;X;Acetyl (K);X;X;X;Acetyl (K);X;X;Acetyl (K);X;X;X	XXXXXPPPPPPPPPPPPXXXXXXXXXXXXXX	PEPAK(1)SAPAPK(1)K	11	2	0.63797		22035	22035	0	0	0	0	28498	0
P11352	62	P11352	P11352	sp|P11352|GPX1_MOUSE Glutathione peroxidase 1 OS=Mus musculus OX=10090 GN=Gpx1 PE=1 SV=2	1	0.000291165	137.13	1	K	UGTTIRDYTEMNDLQKRLGPRGLVVLGFPCN	X;X;X;X;X;X;X;X;X;X;X;X;X;X;X;Acetyl (K);X;X;X;X;X;X;X;X;X;X;X;X;X;X;X	XXXXXXPPPPPPPPPPPXXXXXXXXXXXXXX	DYTEMNDLQK(1)R	10	2	0.2799		4279;4280;4281;4282;4283	4283	13067	7821.6	14058	0	6727.2	4843
P11352	95	P11352	P11352	sp|P11352|GPX1_MOUSE Glutathione peroxidase 1 OS=Mus musculus OX=10090 GN=Gpx1 PE=1 SV=2	1	0.000167423	120.45	1	K	GHQENGKNEEILNSLKYVRPGGGFEPNFTLF	X;X;X;X;X;X;X;X;X;X;X;X;X;X;X;Acetyl (K);X;X;X;X;X;X;X;X;X;X;X;X;X;X;X	XXXXXXXPPPPPPPPPPPPXXXXXXXXXXXX	NEEILNSLK(1)YVR	9	2	-1.0932		20822;20823;20824;20825;20826;20827	20827	27678	21837	24258	18538	24607	18110
P11404	10	P11404	P11404	sp|P11404|FABPH_MOUSE Fatty acid-binding protein, heart OS=Mus musculus OX=10090 GN=Fabp3 PE=1 SV=5	1	1.56432e-16	174.8	1	K	______MADAFVGTWKLVDSKNFDDYMKSLG	X;X;X;X;X;X;X;X;X;X;X;X;X;X;X;Acetyl (K);X;X;X;X;X;X;X;X;X;X;X;Acetyl (K);X;X;X	XXXXXXXPPPPPPPPPPPPPPXXXXXXXXXX	ADAFVGTWK(1)LVDSK	9	2	-0.40928		417;418;419;420;421;422	422	42408	116450	262480	67964	85827	79931
P11404	97	P11404	P11404	sp|P11404|FABPH_MOUSE Fatty acid-binding protein, heart OS=Mus musculus OX=10090 GN=Fabp3 PE=1 SV=5	1	3.36472e-10	108.92	1	K	KSLVTLDGGKLIHVQKWNGQETTLTRELVDG	X;X;X;X;X;X;X;X;X;X;X;X;X;X;X;Acetyl (K);X;X;X;X;X;X;X;X;X;X;X;X;X;X;X	XXXXXXXXXXPPPPPPPPPPPPPPPPXXXXX	LIHVQK(1)WNGQETTLTR	6	3	-0.30136		16869;16870;16871;16872;16873;16874;16875;16876;16877	16877	107230	70617	77110	54008	85479	60878
P11404	22	P11404	P11404	sp|P11404|FABPH_MOUSE Fatty acid-binding protein, heart OS=Mus musculus OX=10090 GN=Fabp3 PE=1 SV=5	1	1.84641e-14	145.9	1	K	GTWKLVDSKNFDDYMKSLGVGFATRQVASMT	X;X;X;Acetyl (K);X;X;X;X;X;X;X;X;X;X;X;Acetyl (K);X;X;X;X;X;X;X;X;X;X;X;X;X;Oxidation (M);X	XXXXXXXXXPPPPPPPPPPPPPPPPXXXXXX	NFDDYMK(1)SLGVGFATR	7	2	-0.014617		20853;20854	20854	0	23711	15606	0	0	0
P11404	53	P11404	P11404	sp|P11404|FABPH_MOUSE Fatty acid-binding protein, heart OS=Mus musculus OX=10090 GN=Fabp3 PE=1 SV=5	1	3.61168e-06	130.9	1	K	KPTTIIEKNGDTITIKTQSTFKNTEINFQLG	X;X;X;X;X;X;X;X;X;X;X;X;X;X;X;Acetyl (K);X;X;X;X;X;X;X;X;X;X;X;X;X;X;X	XXXXXXXXPPPPPPPPPPPPPPXXXXXXXXX	NGDTITIK(1)TQSTFK	8	2	0.74904		20924;20925;20926	20926	0	0	41061	45258	0	54423
P11404	45	P11404	P11404	sp|P11404|FABPH_MOUSE Fatty acid-binding protein, heart OS=Mus musculus OX=10090 GN=Fabp3 PE=1 SV=5	1	8.96607e-24	179.68	1	K	TRQVASMTKPTTIIEKNGDTITIKTQSTFKN	X;X;X;X;X;X;Oxidation (M);X;X;X;X;X;X;X;X;Acetyl (K);X;X;X;X;X;X;X;Acetyl (K);X;X;X;X;X;X;X	XXXXXXXXXPPPPPPPPPPPPPPPXXXXXXX	PTTIIEK(1)NGDTITIK	7	2	-2.6799		22813;22814;22815;22816;22817	22817	107100	105200	129570	76504	124410	0
P11404	91	P11404	P11404	sp|P11404|FABPH_MOUSE Fatty acid-binding protein, heart OS=Mus musculus OX=10090 GN=Fabp3 PE=1 SV=5	1	2.30529e-54	214.31	1	K	ADDRKVKSLVTLDGGKLIHVQKWNGQETTLT	X;X;X;X;X;X;X;X;X;X;X;X;X;X;X;Acetyl (K);X;X;X;X;X;Acetyl (K);X;X;X;X;X;X;X;X;X	XXXXXXXPPPPPPPPPPPPPPPXXXXXXXXX	SLVTLDGGK(1)LIHVQK	9	2	-2.4847		26345;26346;26347;26348;26349;26350	26350	115290	123440	121060	119610	123580	94566
P11499	559	P11499	P11499	sp|P11499|HS90B_MOUSE Heat shock protein HSP 90-beta OS=Mus musculus OX=10090 GN=Hsp90ab1 PE=1 SV=3	1	0.00390243	89.531	1	K	PEDEEEKKKMEESKAKFENLCKLMKEILDKK	X;X;X;X;X;X;X;X;X;X;X;X;X;X;X;Acetyl (K);X;X;X;X;X;X;X;X;X;X;X;X;X;X;X	XXXXXXXXXXXXXXPPPPPPPPXXXXXXXXX	AK(1)FENLCK	2	2	-1.0452		1379;1380	1380	0	15324	27865	0	0	0
P11499	438	P11499	P11499	sp|P11499|HS90B_MOUSE Heat shock protein HSP 90-beta OS=Mus musculus OX=10090 GN=Hsp90ab1 PE=1 SV=3	1	0.000152986	125.44	1	K	KENYKKFYEAFSKNLKLGIHEDSTNRRRLSE	X;X;X;X;X;X;X;X;X;X;X;X;X;X;X;Acetyl (K);X;X;X;X;X;X;X;X;X;X;X;X;X;X;X	XXXXXXXXXXXXXPPPPPPPPPPPPPXXXXX	NLK(1)LGIHEDSTNR	3	2	-1.1319		21233;21234;21235;21236;21237;21238	21238	47928	37897	15853	3318	14227	3951.7
P11499	577	P11499	P11499	sp|P11499|HS90B_MOUSE Heat shock protein HSP 90-beta OS=Mus musculus OX=10090 GN=Hsp90ab1 PE=1 SV=3	1	0.00331868	68.512	1	K	NLCKLMKEILDKKVEKVTISNRLVSSPCCIV	X;X;X;X;X;X;X;X;X;X;X;X;X;X;X;Acetyl (K);X;X;X;X;X;X;X;X;X;X;X;X;X;X;X	XXXXXXXXXXXXXPPPPPPPPPXXXXXXXXX	VEK(1)VTISNR	3	2	-0.086741		35869;35870	35870	33048	0	0	0	15327	0
P11531	225	P11531	P11531	sp|P11531|DMD_MOUSE Dystrophin OS=Mus musculus OX=10090 GN=Dmd PE=1 SV=3	1	6.43598e-08	126.7	1	K	EKLLDPEDVATTYPDKKSILMYITSLFQVLP	X;X;X;X;X;X;X;X;X;X;X;X;X;X;X;Acetyl (K);X;X;X;X;X;X;X;X;X;X;X;X;X;X;X	XXPPPPPPPPPPPPPPPXXXXXXXXXXXXXX	LLDPEDVATTYPDK(1)K	14	2	-2.6243		17278;17279;17280;17281;17282;17283	17283	33971	36874	43878	46516	38380	51996
P11983	400	P11983	P11983	sp|P11983|TCPA_MOUSE T-complex protein 1 subunit alpha OS=Mus musculus OX=10090 GN=Tcp1 PE=1 SV=3	1	1.31477e-22	147.52	1	K	CDEMERSLHDALCVVKRVLELKSVVPGGGAV	X;X;X;X;X;X;X;X;X;X;X;X;X;X;X;Acetyl (K);X;X;X;X;X;X;X;X;X;X;X;X;X;X;X	XXXXXXPPPPPPPPPPPXXXXXXXXXXXXXX	SLHDALCVVK(1)R	10	2	-0.3289		26082;26083;26084;26085;26086;26087	26087	525590	391180	516830	541990	476250	461260
P12787	145	P12787	P12787	sp|P12787|COX5A_MOUSE Cytochrome c oxidase subunit 5A, mitochondrial OS=Mus musculus OX=10090 GN=Cox5a PE=1 SV=2	1	1.31609e-64	240.95	1	K	LNELGISTPEELGLDKV______________	X;X;X;X;X;X;X;X;X;X;X;X;X;X;X;Acetyl (K);X;X;X;X;X;X;X;X;X;X;X;X;X;X;X	PPPPPPPPPPPPPPPPPXXXXXXXXXXXXXX	PTLNELGISTPEELGLDK(1)V	18	2	-0.98782		22781;22782;22783;22784;22785	22785	0	30208	181010	18969	21586	21336
P13707	62	P13707	P13707	sp|P13707|GPDA_MOUSE Glycerol-3-phosphate dehydrogenase [NAD(+)], cytoplasmic OS=Mus musculus OX=10090 GN=Gpd1 PE=1 SV=3	1	3.5957e-07	50.185	1	K	GRKLTEIINTQHENVKYLPGHKLPPNVVAIP	X;X;X;X;X;X;X;X;X;X;X;X;X;X;X;Acetyl (K);X;X;X;X;X;X;X;X;X;X;X;X;X;X;X	XXXPPPPPPPPPPPPPPPPPPPXXXXXXXXX	LTEIINTQHENVK(1)YLPGHK	13	3	1.3055		18760;18761	18761	6794.2	0	4665.8	0	0	0
P14094	289	P14094	P14094	sp|P14094|AT1B1_MOUSE Sodium/potassium-transporting ATPase subunit beta-1 OS=Mus musculus OX=10090 GN=Atp1b1 PE=1 SV=1	1	1.30924e-06	121.26	1	K	RVECKAYGENIGYSEKDRFQGRFDVKIEIKS	X;X;X;X;X;X;X;X;X;X;X;X;X;X;X;Acetyl (K);X;X;X;X;X;X;X;X;X;X;X;X;X;X;X	XXXXXPPPPPPPPPPPPPXXXXXXXXXXXXX	AYGENIGYSEK(1)DR	11	2	-1.3973		2960;2961;2962;2963;2964	2964	54086	49184	33468	0	21193	10309
P14094	21	P14094	P14094	sp|P14094|AT1B1_MOUSE Sodium/potassium-transporting ATPase subunit beta-1 OS=Mus musculus OX=10090 GN=Atp1b1 PE=1 SV=1	1	0.0263029	44.394	1	K	AKEEGSWKKFIWNSEKKEFLGRTGGSWFKIL	X;X;X;X;X;X;X;X;X;X;X;X;X;X;X;Acetyl (K);X;X;X;X;X;X;X;X;X;X;X;X;X;X;X	XXXXXXXXXPPPPPPPPXXXXXXXXXXXXXX	FIWNSEK(1)K	7	2	-1.2835		6403	6403	130800	0	0	0	0	0
P14094	217	P14094	P14094	sp|P14094|AT1B1_MOUSE Sodium/potassium-transporting ATPase subunit beta-1 OS=Mus musculus OX=10090 GN=Atp1b1 PE=1 SV=1	1	0.00178279	51.663	1	K	MMKYNPNVLPVQCTGKRDEDKDKVGNIEYFG	X;X;X;X;X;X;X;X;X;X;X;X;X;X;X;Acetyl (K);X;X;X;X;X;X;X;X;X;X;X;X;X;X;X	XXXPPPPPPPPPPPPPPXXXXXXXXXXXXXX	YNPNVLPVQCTGK(1)R	13	2	-3.1915		39692	39692	7364.6	0	0	0	0	0
P14152	214	P14152	P14152	sp|P14152|MDHC_MOUSE Malate dehydrogenase, cytoplasmic OS=Mus musculus OX=10090 GN=Mdh1 PE=1 SV=3	1	0.00142099	93.254	1	K	KVKLQGKEVGVYEALKDDSWLKGEFITTVQQ	Acetyl (K);X;X;X;X;X;X;X;X;X;X;X;X;X;X;Acetyl (K);X;X;X;X;X;X;X;X;X;X;X;X;X;X;X	XXXXXXXPPPPPPPPPPPPPPPXXXXXXXXX	EVGVYEALK(1)DDSWLK	9	2	2.7218		5493;5494	5494	0	0	0	0	8381.9	6809.7
P14152	236	P14152	P14152	sp|P14152|MDHC_MOUSE Malate dehydrogenase, cytoplasmic OS=Mus musculus OX=10090 GN=Mdh1 PE=1 SV=3	1	0.0234866	24.579	1	K	GEFITTVQQRGAAVIKARKLSSAMSAAKAIA	X;X;X;X;X;X;X;X;X;X;X;X;X;X;X;Acetyl (K);X;X;Acetyl (K);X;X;X;X;X;X;X;X;X;X;X;X	XXXXXXXXXXPPPPPPPPXXXXXXXXXXXXX	GAAVIK(1)AR	6	2	-0.1202		7401;7402;7403	7403	463080	305190	190600	0	0	0
P14152	110	P14152	P14152	sp|P14152|MDHC_MOUSE Malate dehydrogenase, cytoplasmic OS=Mus musculus OX=10090 GN=Mdh1 PE=1 SV=3	1	4.72009e-11	125.72	1	K	GMERKDLLKANVKIFKSQGTALEKYAKKSVK	X;X;X;X;X;X;X;X;Acetyl (K);X;X;X;X;X;X;Acetyl (K);X;X;X;X;X;X;X;Acetyl (K);X;X;X;X;X;X;X	XXXXXXXXXXXXXPPPPPPPPPPPXXXXXXX	IFK(1)SQGTALEK	3	2	-2.0743		12905;12906;12907;12908;12909;12910	12910	277610	201440	245060	168900	268780	149590
P14152	118	P14152	P14152	sp|P14152|MDHC_MOUSE Malate dehydrogenase, cytoplasmic OS=Mus musculus OX=10090 GN=Mdh1 PE=1 SV=3	1	2.14264e-10	147.64	1	K	KANVKIFKSQGTALEKYAKKSVKVIVVGNPA	Acetyl (K);X;X;X;X;X;X;X;X;X;X;X;X;X;X;Acetyl (K);X;X;X;X;X;X;X;X;X;X;X;X;X;X;X	XXXXXXXXPPPPPPPPPPPXXXXXXXXXXXX	SQGTALEK(1)YAK	8	2	1.1286		26760;26761;26762;26763;26764;26765	26765	546710	429290	612570	405470	346590	272600
P14152	103	P14152	P14152	sp|P14152|MDHC_MOUSE Malate dehydrogenase, cytoplasmic OS=Mus musculus OX=10090 GN=Mdh1 PE=1 SV=3	1	1.31119e-05	100.57	1	K	GSMPRREGMERKDLLKANVKIFKSQGTALEK	X;X;Oxidation (M);X;X;X;X;X;X;X;X;X;X;X;X;Acetyl (K);X;X;X;X;X;X;Acetyl (K);X;X;X;X;X;X;X;Acetyl (K)	XXXXXXXXXXXPPPPPPPPPXXXXXXXXXXX	KDLLK(1)ANVK	5	2	-1.3743		14807;14808;14809;14810;14811;14812	14809	120590	102610	111600	63466	78876	68646
P14152	239	P14152	P14152	sp|P14152|MDHC_MOUSE Malate dehydrogenase, cytoplasmic OS=Mus musculus OX=10090 GN=Mdh1 PE=1 SV=3	1	0.00454511	52.876	1	K	ITTVQQRGAAVIKARKLSSAMSAAKAIADHI	X;X;X;X;X;X;X;X;X;X;X;X;Acetyl (K);X;X;Acetyl (K);X;X;X;X;X;X;X;X;X;X;X;X;X;X;X	XXXXXXXXXXXXXXXPPPPPPPPPPXXXXXX	K(1)LSSAMSAAK	1	2	-2.987		15149;15150;15151;15152	15152	0	0	71962	59882	58453	47561
P14152	199	P14152	P14152	sp|P14152|MDHC_MOUSE Malate dehydrogenase, cytoplasmic OS=Mus musculus OX=10090 GN=Mdh1 PE=1 SV=3	1	0.00017696	42.108	1	K	WGNHSSTQYPDVNHAKVKLQGKEVGVYEALK	X;X;X;X;X;X;X;X;X;X;X;X;X;X;X;Acetyl (K);X;X;X;X;X;X;X;X;X;X;X;X;X;X;Acetyl (K)	PPPPPPPPPPPPPPPPPPXXXXXXXXXXXXX	NVIIWGNHSSTQYPDVNHAK(1)VK	20	3	-2.7877		21737	21737	141170	0	0	0	0	0
P14152	298	P14152	P14152	sp|P14152|MDHC_MOUSE Malate dehydrogenase, cytoplasmic OS=Mus musculus OX=10090 GN=Mdh1 PE=1 SV=3	1	2.21904e-23	164.79	1	K	DLLYSFPVVIKNKTWKFVEGLPINDFSREKM	X;X;X;X;X;X;X;X;X;X;X;X;X;X;X;Acetyl (K);X;X;X;X;X;X;X;X;X;X;X;X;X;X;X	XXXXXXXXXXXXXPPPPPPPPPPPPPPPXXX	TWK(1)FVEGLPINDFSR	3	2	-1.4779		34706;34707;34708;34709;34710;34711	34711	121870	208800	215020	76323	197320	95638
P14733	484	P14733	P14733	sp|P14733|LMNB1_MOUSE Lamin-B1 OS=Mus musculus OX=10090 GN=Lmnb1 PE=1 SV=3	1	0.000173461	116.74	1	K	GWEMIRKIGDTSVSYKYTSRYVLKAGQTVTV	X;X;X;X;X;X;X;X;X;X;X;X;X;X;X;Acetyl (K);X;X;X;X;X;X;X;X;X;X;X;X;X;X;X	XXXXXXXPPPPPPPPPPPPPXXXXXXXXXXX	IGDTSVSYK(1)YTSR	9	2	-2.1487		12993	12993	0	0	0	9742.4	0	0
P14824	478	P14824	P14824	sp|P14824|ANXA6_MOUSE Annexin A6 OS=Mus musculus OX=10090 GN=Anxa6 PE=1 SV=3	1	1.24045e-09	142.88	1	K	ATRTNAEIRAINEAYKEDYHKSLEDALSSDT	X;X;X;X;X;X;X;X;X;X;X;X;X;X;X;Acetyl (K);X;X;X;X;Acetyl (K);X;X;X;X;X;X;X;X;X;X	XXXXXXXXXPPPPPPPPPPPPXXXXXXXXXX	AINEAYK(1)EDYHK	7	2	-2.3801		1303;1304;1305;1306;1307	1307	32507	11481	0	0	8895.4	10002
P14824	483	P14824	P14824	sp|P14824|ANXA6_MOUSE Annexin A6 OS=Mus musculus OX=10090 GN=Anxa6 PE=1 SV=3	1	8.87801e-11	143.9	1	K	AEIRAINEAYKEDYHKSLEDALSSDTSGHFR	X;X;X;X;X;X;X;X;X;X;X;X;X;X;X;Acetyl (K);X;X;X;X;X;X;X;X;X;X;X;X;X;X;X	XXXXXXXXXXXPPPPPPPPPPPPPPPPPPPP	EDYHK(1)SLEDALSSDTSGHFR	5	3	-1.6345		4510;4511;4512;4513	4513	8743.6	13442	13274	7085	0	0
P14824	620	P14824	P14824	sp|P14824|ANXA6_MOUSE Annexin A6 OS=Mus musculus OX=10090 GN=Anxa6 PE=1 SV=3	1	1.61461e-15	112.42	1	K	ADKLYKSMKGAGTDEKTLTRVMVSRSEIDLL	X;X;X;X;X;X;X;X;X;X;X;X;X;X;X;Acetyl (K);X;X;X;X;X;X;X;X;X;X;X;X;X;X;X	XXXXXXXXXPPPPPPPPPPPXXXXXXXXXXX	GAGTDEK(1)TLTR	7	2	-1.0554		7470;7471;7472;7473;7474;7475	7475	196280	171720	158870	126910	119990	116620
P14824	370	P14824	P14824	sp|P14824|ANXA6_MOUSE Annexin A6 OS=Mus musculus OX=10090 GN=Anxa6 PE=1 SV=3	1	3.81571e-65	200.61	1	K	GTVCAANDFNPDADAKALRKAMKGIGTDEAT	X;X;X;X;X;X;X;X;X;X;X;X;X;X;X;Acetyl (K);X;X;X;X;X;X;X;X;X;X;X;X;X;X;X	PPPPPPPPPPPPPPPPPPPXXXXXXXXXXXX	GTVCAANDFNPDADAK(1)ALR	16	2	-1.1565		9518;9519;9520;9521;9522;9523	9523	280020	304110	325880	276170	243270	202790
P14824	406	P14824	P14824	sp|P14824|ANXA6_MOUSE Annexin A6 OS=Mus musculus OX=10090 GN=Anxa6 PE=1 SV=3	1	0.00575802	60.286	1	K	THRSNAQRQQIRQTFKSHFGRDLMADLKSEI	X;X;X;X;X;X;X;X;X;X;X;X;X;X;X;Acetyl (K);X;X;X;X;X;X;X;X;X;X;X;X;X;X;X	XXXXXXXXXXXXPPPPPPPPPXXXXXXXXXX	QTFK(1)SHFGR	4	2	-0.75517		23938;23939;23940;23941	23941	0	34629	34798	5588.3	0	21015
P14824	579	P14824	P14824	sp|P14824|ANXA6_MOUSE Annexin A6 OS=Mus musculus OX=10090 GN=Anxa6 PE=1 SV=3	1	1.81697e-05	115.85	1	K	QEFIKKTNYDIEHVIKKEMSGDVKDAFVAIV	X;X;X;X;X;X;X;X;X;X;X;X;X;X;X;Acetyl (K);X;X;X;X;X;X;X;X;X;X;X;X;X;X;X	XXXXXXPPPPPPPPPPPXXXXXXXXXXXXXX	TNYDIEHVIK(1)K	10	2	1.271		32432;32433;32434;32435;32436;32437	32437	41711	39335	34151	19555	27527	20130
P14824	81	P14824	P14824	sp|P14824|ANXA6_MOUSE Annexin A6 OS=Mus musculus OX=10090 GN=Anxa6 PE=1 SV=3	1	0.000429253	60.954	1	K	YGKDLIEDLKYELTGKFERLIVNLMRPLAYC	X;X;X;X;X;X;X;X;X;X;X;X;X;X;X;Acetyl (K);X;X;X;X;X;X;X;X;X;X;X;X;X;X;X	XXXXXXXXXXPPPPPPPPPXXXXXXXXXXXX	YELTGK(1)FER	6	2	3.0265		39055;39056;39057;39058;39059;39060	39060	31083	34029	20757	12680	19848	13888
P15532;Q01768	26;26	P15532;Q01768	Q01768	sp|P15532|NDKA_MOUSE Nucleoside diphosphate kinase A OS=Mus musculus OX=10090 GN=Nme1 PE=1 SV=1;sp|Q01768|NDKB_MOUSE Nucleoside diphosphate kinase B OS=Mus musculus OX=10090 GN=Nme2 PE=1 SV=1	1	0.00707158	34.408	1	K	IKPDGVQRGLVGEIIKRFEQKGFRLVAMKFL;IKPDGVQRGLVGEIIKRFEQKGFRLVGLKFL	X;Acetyl (K);X;X;X;X;X;X;X;X;X;X;X;X;X;Acetyl (K);X;X;X;X;X;X;X;X;X;X;X;X;X;X;X	XXXXXXXXPPPPPPPPPXXXXXXXXXXXXXX	GLVGEIIK(1)R	8	2	1.2331		8836;8837;8838;8839;8840	8840	49246	0	22058	25386	30689	24285
P15532;Q01768	12;12	P15532;Q01768	Q01768	sp|P15532|NDKA_MOUSE Nucleoside diphosphate kinase A OS=Mus musculus OX=10090 GN=Nme1 PE=1 SV=1;sp|Q01768|NDKB_MOUSE Nucleoside diphosphate kinase B OS=Mus musculus OX=10090 GN=Nme2 PE=1 SV=1	1	0.000596779	71.366	1	K	____MANLERTFIAIKPDGVQRGLVGEIIKR;____MANSERTFIAIKPDGVQRGLVGEIIKR	X;X;X;X;X;X;X;X;X;X;X;X;X;X;X;Acetyl (K);X;X;X;X;X;X;X;X;X;X;X;X;X;Acetyl (K);X	XXXXXXXXXXPPPPPPPPPPPPXXXXXXXXX	TFIAIK(1)PDGVQR	6	2	-0.41779		29418;29419;29420	29420	70261	79988	17012	0	0	0
P15532;Q01768	100;100	P15532;Q01768	Q01768	sp|P15532|NDKA_MOUSE Nucleoside diphosphate kinase A OS=Mus musculus OX=10090 GN=Nme1 PE=1 SV=1;sp|Q01768|NDKB_MOUSE Nucleoside diphosphate kinase B OS=Mus musculus OX=10090 GN=Nme2 PE=1 SV=1	1	0.000131802	73.821	1	K	KTGRVMLGETNPADSKPGTIRGDFCIQVGRN	X;X;X;X;X;X;X;X;X;X;X;X;X;X;X;Acetyl (K);X;X;X;X;X;X;X;X;X;X;X;X;X;X;X	XXXXPPPPPPPPPPPPPPPPPXXXXXXXXXX	VMLGETNPADSK(1)PGTIR	12	2	-3.0969		37162;37163;37164	37164	0	0	0	10253	5651.3	1652.8
P15864;Q07133;P43274;P43277	75;77;75;76	P15864;P43274;P43277	P43274	sp|P15864|H12_MOUSE Histone H1.2 OS=Mus musculus OX=10090 GN=H1-2 PE=1 SV=2;sp|Q07133|H1T_MOUSE Histone H1t OS=Mus musculus OX=10090 GN=H1-6 PE=1 SV=4;sp|P43274|H14_MOUSE Histone H1.4 OS=Mus musculus OX=10090 GN=H1-4 PE=1 SV=2;sp|P43277|H13_MOUSE Histone H	1	2.178e-06	64.816	1	K	AALKKALAAAGYDVEKNNSRIKLGLKSLVSK	X;X;X;Acetyl (K);X;X;X;X;X;X;X;X;X;X;X;Acetyl (K);X;X;X;X;X;X;X;X;X;Acetyl (K);X;X;X;X;X	XXXXXPPPPPPPPPPPPPPPXXXXXXXXXXX	ALAAAGYDVEK(1)NNSR	11	2	-2.6886		1447;1448	1448	2089.5	3705.5	0	0	0	0
P15864	17	P15864	P15864	sp|P15864|H12_MOUSE Histone H1.2 OS=Mus musculus OX=10090 GN=H1-2 PE=1 SV=2	1	1.72511e-05	77.99	1	K	SEAAPAAPAAAPPAEKAPAKKKAAKKPAGVR	X;X;X;X;X;X;X;X;X;X;X;X;X;X;X;Acetyl (K);X;X;X;X;X;X;X;X;X;X;X;X;X;X;X	PPPPPPPPPPPPPPPPPPPPXXXXXXXXXXX	SEAAPAAPAAAPPAEK(1)APAK	16	2	0.14564		24781;24782;24783;24784;24785;24786	24786	23894	24735	14745	11707	19637	15587
P16125	7	P16125	P16125	sp|P16125|LDHB_MOUSE L-lactate dehydrogenase B chain OS=Mus musculus OX=10090 GN=Ldhb PE=1 SV=2	1	9.42557e-61	212.03	1	K	_________MATLKEKLIASVADDEAAVPNN	X;X;X;X;X;X;X;X;X;X;X;X;X;X;X;Acetyl (K);X;X;X;X;X;X;X;X;X;X;X;X;X;X;X	XXXXXXXXXXXXXXPPPPPPPPPPPPPPPPP	EK(1)LIASVADDEAAVPNNK	2	2	-0.35325		4955;4956;4957;4958;4959;4960	4960	119500	108450	69742	33681	64554	39504
P16125	233	P16125	P16125	sp|P16125|LDHB_MOUSE L-lactate dehydrogenase B chain OS=Mus musculus OX=10090 GN=Ldhb PE=1 SV=2	1	2.39073e-06	115.45	1	K	EMGTDNDSENWKEVHKMVVDSAYEVIKLKGY	X;X;X;X;X;X;X;X;X;X;X;X;X;X;X;Acetyl (K);X;X;X;X;X;X;X;X;X;X;Acetyl (K);X;X;X;X	XXXXXXXXXXXXPPPPPPPPPPPPPPPXXXX	EVHK(1)MVVDSAYEVIK	4	2	-0.5791		5495;5496;5497;5498	5498	62287	47360	48257	0	0	17368
P16125	244	P16125	P16125	sp|P16125|LDHB_MOUSE L-lactate dehydrogenase B chain OS=Mus musculus OX=10090 GN=Ldhb PE=1 SV=2	1	2.55014e-10	166.54	1	K	KEVHKMVVDSAYEVIKLKGYTNWAIGLSVAD	X;X;X;X;X;X;X;X;X;X;X;X;X;X;X;Acetyl (K);X;X;X;X;X;X;X;X;X;X;X;X;X;X;X	XXXXXPPPPPPPPPPPPPXXXXXXXXXXXXX	MVVDSAYEVIK(1)LK	11	2	-2.0448		20572;20573;20574;20575;20576;20577	20577	183910	154570	156820	97586	159380	114250
P16125	308	P16125	P16125	sp|P16125|LDHB_MOUSE L-lactate dehydrogenase B chain OS=Mus musculus OX=10090 GN=Ldhb PE=1 SV=2	1	8.63327e-11	122.3	1	K	PCILNARGLTSVINQKLKDDEVAQLRKSADT	X;X;X;X;X;X;X;X;X;X;X;X;X;X;X;Acetyl (K);X;X;X;X;X;X;X;X;X;X;X;X;X;X;X	XXXXXXXPPPPPPPPPPPXXXXXXXXXXXXX	GLTSVINQK(1)LK	9	2	-2.0139		8830;8831;8832;8833;8834;8835	8835	411520	276680	208920	120990	245600	154220
P16125	82	P16125	P16125	sp|P16125|LDHB_MOUSE L-lactate dehydrogenase B chain OS=Mus musculus OX=10090 GN=Ldhb PE=1 SV=2	1	1.50251e-06	127.11	1	K	QHGSLFLQTPKIVADKDYSVTANSKIVVVTA	X;X;X;X;X;X;X;X;X;X;X;X;X;X;X;Acetyl (K);X;X;X;X;X;X;X;X;X;X;X;X;X;X;X	XXXXXXXXXXXPPPPPPPPPPPPPPXXXXXX	IVADK(1)DYSVTANSK	5	2	-1.3005		14466;14467;14468;14469;14470;14471	14471	21801	16677	27291	11790	15944	12520
P16125	156	P16125	P16125	sp|P16125|LDHB_MOUSE L-lactate dehydrogenase B chain OS=Mus musculus OX=10090 GN=Ldhb PE=1 SV=2	1	0.0133243	47.083	1	K	VDILTYVTWKLSGLPKHRVIGSGCNLDSARF	X;X;X;X;X;X;X;X;X;X;X;X;X;X;X;Acetyl (K);X;X;X;X;X;X;X;X;X;X;X;X;X;X;X	XXXXXXXXXXPPPPPPPPXXXXXXXXXXXXX	LSGLPK(1)HR	6	2	0.073035		18506;18507;18508	18508	30895	25885	0	8320.7	0	0
P16125	329	P16125	P16125	sp|P16125|LDHB_MOUSE L-lactate dehydrogenase B chain OS=Mus musculus OX=10090 GN=Ldhb PE=1 SV=2	1	4.77593e-15	122.12	1	K	VAQLRKSADTLWDIQKDLKDL__________	X;X;X;X;X;X;X;X;X;X;X;X;X;X;X;Acetyl (K);X;X;X;X;X;X;X;X;X;X;X;X;X;X;X	XXXXXXPPPPPPPPPPPPPXXXXXXXXXXXX	SADTLWDIQK(1)DLK	10	2	-3.5311		24301;24302;24303;24304;24305;24306	24306	41590	37753	26224	17614	30430	5520.5
P16332	210	P16332	P16332	sp|P16332|MUTA_MOUSE Methylmalonyl-CoA mutase, mitochondrial OS=Mus musculus OX=10090 GN=Mmut PE=1 SV=2	1	1.05056e-30	155.59	1	K	ATFIVTGEEQGVPKEKLTGTIQNDILKEFMV	X;X;X;X;X;X;X;X;X;X;X;X;X;X;X;Acetyl (K);X;X;X;X;X;X;X;X;X;X;X;X;X;X;X	XXXXXXXXXXXXXXPPPPPPPPPPPPPXXXX	EK(1)LTGTIQNDILK	2	2	-2.6516		4989;4990;4991;4992;4993;4994	4994	101410	120290	125100	85810	121080	118100
P16332	619	P16332	P16332	sp|P16332|MUTA_MOUSE Methylmalonyl-CoA mutase, mitochondrial OS=Mus musculus OX=10090 GN=Mmut PE=1 SV=2	1	1.04632e-09	93.354	1	K	KFMEREGRRPRLLVAKMGQDGHDRGAKVIAT	Acetyl (K);X;X;X;X;X;X;X;X;X;X;X;X;X;X;Acetyl (K);X;X;X;X;X;X;X;X;X;X;X;X;X;X;X	XXXXXXXXXXXPPPPPPPPPPPPPXXXXXXX	LLVAK(1)MGQDGHDR	5	2	0.97018		17840;17841;17842;17843;17844;17845	17845	17727	17690	13571	8376.8	13303	9279.3
P16332	333	P16332	P16332	sp|P16332|MUTA_MOUSE Methylmalonyl-CoA mutase, mitochondrial OS=Mus musculus OX=10090 GN=Mmut PE=1 SV=2	1	5.76575e-05	106.23	1	K	AKMRAGRRLWAHLIEKMFQPKNSKSLLLRAH	X;X;X;X;X;X;X;X;X;X;X;X;X;X;X;Acetyl (K);X;X;X;X;X;X;X;X;X;X;X;X;X;X;X	XXXXXXXXPPPPPPPPPPPPPXXXXXXXXXX	LWAHLIEK(1)MFQPK	8	2	-1.1066		19258;19259;19260;19261	19261	0	8359.9	0	6806.4	11722	16501
P16332	604	P16332	P16332	sp|P16332|MUTA_MOUSE Methylmalonyl-CoA mutase, mitochondrial OS=Mus musculus OX=10090 GN=Mmut PE=1 SV=2	1	0.000900948	67.931	1	K	FGESKEITSAIKRVNKFMEREGRRPRLLVAK	X;X;X;X;X;X;X;X;X;X;X;X;X;X;X;Acetyl (K);X;X;X;X;X;X;X;X;X;X;X;X;X;X;Acetyl (K)	XXXXXXXXXXXXXPPPPPPPXXXXXXXXXXX	VNK(1)FMER	3	2	-0.52321		37213;37214;37215;37216	37216	131240	119340	0	73685	108210	0
P16546	637	P16546	P16546	sp|P16546|SPTN1_MOUSE Spectrin alpha chain, non-erythrocytic 1 OS=Mus musculus OX=10090 GN=Sptan1 PE=1 SV=4	1	5.24331e-05	79.153	1	K	SANQSRIDALEKAGQKLIDVNHYAKEEVAAR	X;X;X;X;X;X;X;X;X;X;X;X;X;X;X;Acetyl (K);X;X;X;X;X;X;X;X;X;X;X;X;X;X;X	XXXXXXXXXXXXPPPPPPPPPPPPPXXXXXX	AGQK(1)LIDVNHYAK	4	2	0.72163		1042;1043	1043	0	3329.8	0	0	5310.2	0
P16858	64	P16858	P16858	sp|P16858|G3P_MOUSE Glyceraldehyde-3-phosphate dehydrogenase OS=Mus musculus OX=10090 GN=Gapdh PE=1 SV=2	1	1.76861e-06	107.74	1	K	STHGKFNGTVKAENGKLVINGKPITIFQERD	X;X;X;X;X;X;X;X;X;X;X;X;X;X;X;Acetyl (K);X;X;X;X;X;X;X;X;X;X;X;X;X;X;X	XXXXXXXXXXXPPPPPPPPPPPXXXXXXXXX	AENGK(1)LVINGK	5	2	0.35104		623;624;625;626;627;628	628	40584	32266	41799	27911	26672	20314
P16858	213	P16858	P16858	sp|P16858|G3P_MOUSE Glyceraldehyde-3-phosphate dehydrogenase OS=Mus musculus OX=10090 GN=Gapdh PE=1 SV=2	1	3.11378e-14	110.65	1	K	RGAAQNIIPASTGAAKAVGKVIPELNGKLTG	X;X;X;X;X;X;X;X;X;X;X;X;X;X;X;Acetyl (K);X;X;X;X;X;X;X;X;X;X;X;Acetyl (K);X;X;X	XPPPPPPPPPPPPPPPPPPPXXXXXXXXXXX	GAAQNIIPASTGAAK(1)AVGK	15	2	1.287		7395;7396;7397;7398;7399;7400	7400	91540	111400	105790	93986	102160	82691
P16858	252	P16858	P16858	sp|P16858|G3P_MOUSE Glyceraldehyde-3-phosphate dehydrogenase OS=Mus musculus OX=10090 GN=Gapdh PE=1 SV=2	1	0.00111821	94.339	1	K	NVSVVDLTCRLEKPAKYDDIKKVVKQASEGP	X;X;X;X;X;X;X;X;X;X;X;X;X;X;X;Acetyl (K);X;X;X;X;X;X;X;X;Acetyl (K);X;X;X;X;X;X	XXXXXXXXXXPPPPPPPPPPPPXXXXXXXXX	PAK(1)YDDIK	3	2	-1.2916		15946;15947;15948;15949;15950;15951;21929;21930;21931;21932;21933;21934;21935;21936;21937;21938;21939	21933	427520	351880	318450	286310	286090	243000
P16858	192	P16858	P16858	sp|P16858|G3P_MOUSE Glyceraldehyde-3-phosphate dehydrogenase OS=Mus musculus OX=10090 GN=Gapdh PE=1 SV=2	1	2.80961e-10	160.65	1	K	HAITATQKTVDGPSGKLWRDGRGAAQNIIPA	X;X;X;X;X;X;X;X;X;X;X;X;X;X;X;Acetyl (K);X;X;X;X;X;X;X;X;X;X;X;X;X;X;X	XXXXXXXXPPPPPPPPPPPXXXXXXXXXXXX	TVDGPSGK(1)LWR	8	2	-2.6901		34039;34040;34041;34042;34043;34044	34044	3636600	3002400	2819300	2828100	3198600	2806200
P16858	137	P16858	P16858	sp|P16858|G3P_MOUSE Glyceraldehyde-3-phosphate dehydrogenase OS=Mus musculus OX=10090 GN=Gapdh PE=1 SV=2	1	2.07128e-09	78.551	1	K	PSADAPMFVMGVNHEKYDNSLKIVSNASCTT	X;X;X;X;X;X;Oxidation (M);X;X;Oxidation (M);X;X;X;X;X;Acetyl (K);X;X;X;X;X;X;X;X;X;X;X;X;X;X;X	PPPPPPPPPPPPPPPPPPPPPPXXXXXXXXX	VIISAPSADAPMFVMGVNHEK(1)YDNSLK	21	3	0.16473		36523;36524;36525;36526	36526	157160	259440	304720	0	157570	0
P16858	225	P16858	P16858	sp|P16858|G3P_MOUSE Glyceraldehyde-3-phosphate dehydrogenase OS=Mus musculus OX=10090 GN=Gapdh PE=1 SV=2	1	9.49312e-05	78.139	1	K	GAAKAVGKVIPELNGKLTGMAFRVPTPNVSV	X;X;X;Acetyl (K);X;X;X;X;X;X;X;X;X;X;X;Acetyl (K);X;X;X;X;X;X;X;X;X;X;X;X;X;X;X	XXXXXXXXPPPPPPPPPPPPPPPXXXXXXXX	VIPELNGK(1)LTGMAFR	8	2	-1.0788		36583;36584;36585;36586;36587;36588	36588	59955	74069	63929	13280	32478	16258
P16858	261	P16858	P16858	sp|P16858|G3P_MOUSE Glyceraldehyde-3-phosphate dehydrogenase OS=Mus musculus OX=10090 GN=Gapdh PE=1 SV=2	1	0.00123131	77.646	1	K	RLEKPAKYDDIKKVVKQASEGPLKGILGYTE	X;X;X;X;X;X;Acetyl (K);X;X;X;X;X;X;X;X;Acetyl (K);X;X;X;X;X;X;X;X;X;X;X;X;X;X;X	XXXXXXXXXXXXXPPPPPPPPPPPXXXXXXX	VVK(1)QASEGPLK	3	2	-0.63728		37945;37946;37947;37948;37949	37949	22134	30517	9584.3	17810	12845	0
P17095	15	P17095	P17095	sp|P17095|HMGA1_MOUSE High mobility group protein HMG-I/HMG-Y OS=Mus musculus OX=10090 GN=Hmga1 PE=1 SV=4	1	0.000206522	116.44	1	K	_MSESGSKSSQPLASKQEKDGTEKRGRGRPR	X;X;X;X;X;X;X;X;X;X;X;X;X;X;X;Acetyl (K);X;X;X;X;X;X;X;X;X;X;X;X;X;X;X	XXXXXXXXPPPPPPPPPPPXXXXXXXXXXXX	SSQPLASK(1)QEK	8	2	-1.1278		27057;27058;27059;27060;27061;27062	27062	170710	135490	96826	139030	174530	147780
P17182	228	P17182	P17182	sp|P17182|ENOA_MOUSE Alpha-enolase OS=Mus musculus OX=10090 GN=Eno1 PE=1 SV=3	1	1.30057e-09	97.931	1	K	FAPNILENKEALELLKTAIAKAGYTDQVVIG	X;X;X;X;X;X;X;X;X;X;X;X;X;X;X;Acetyl (K);X;X;X;X;X;X;X;X;X;X;X;X;X;X;X	XXXXXXXXXPPPPPPPPPPPPXXXXXXXXXX	EALELLK(1)TAIAK	7	2	-1.9643		4344;4345;4346;4347;4348;4349	4349	16686	19228	32784	11831	12145	8599.8
P17182	92	P17182	P17182	sp|P17182|ENOA_MOUSE Alpha-enolase OS=Mus musculus OX=10090 GN=Eno1 PE=1 SV=3	1	0.016482	72.488	1	K	LVSKKVNVVEQEKIDKLMIEMDGTENKSKFG	X;X;X;Acetyl (K);X;X;X;X;X;X;X;X;X;X;X;Acetyl (K);X;X;X;X;X;X;X;X;X;X;X;X;X;X;X	XXXXXXXXXXXXXPPPPPPPPPPPPPPXXXX	IDK(1)LMIEMDGTENK	3	2	4.6017		12705;12706	12706	0	0	42354	16074	0	0
P17182	420	P17182	P17182	sp|P17182|ENOA_MOUSE Alpha-enolase OS=Mus musculus OX=10090 GN=Eno1 PE=1 SV=3	1	0.02986	18.611	1	K	AKYNQILRIEEELGSKAKFAGRSFRNPLAK_	X;X;X;X;X;X;X;X;X;X;X;X;X;X;X;Acetyl (K);X;X;X;X;X;X;X;X;X;X;X;X;X;X;X	XXXXXXXXPPPPPPPPPPXXXXXXXXXXXXX	IEEELGSK(1)AK	8	2	0.27715		12789	12789	0	0	0	0	6978	0
P17182	193	P17182	P17182	sp|P17182|ENOA_MOUSE Alpha-enolase OS=Mus musculus OX=10090 GN=Eno1 PE=1 SV=3	1	4.88826e-06	116.64	1	K	FREAMRIGAEVYHNLKNVIKEKYGKDATNVG	X;X;X;X;X;X;X;X;X;X;X;X;X;X;X;Acetyl (K);X;X;X;X;X;X;X;X;X;X;X;X;X;X;X	XXXXXXPPPPPPPPPPPPPPXXXXXXXXXXX	IGAEVYHNLK(1)NVIK	10	2	-3.3753		12982;12983;12984;12985	12985	0	0	89898	55323	62435	60911
P17182	89	P17182	P17182	sp|P17182|ENOA_MOUSE Alpha-enolase OS=Mus musculus OX=10090 GN=Eno1 PE=1 SV=3	1	6.49721e-07	126.98	1	K	APALVSKKVNVVEQEKIDKLMIEMDGTENKS	X;X;X;X;X;X;Acetyl (K);X;X;X;X;X;X;X;X;Acetyl (K);X;X;Acetyl (K);X;X;X;X;X;X;X;X;X;X;X;X	XXXXXXXPPPPPPPPPPPPXXXXXXXXXXXX	VNVVEQEK(1)IDK	8	2	-1.2471		15246;15247;15248;37315;37316;37317;37318;37319;37320	37320	103930	98124	127900	117700	79627	76071
P17563;Q63836	93;93	P17563	P17563	sp|P17563|SBP1_MOUSE Methanethiol oxidase OS=Mus musculus OX=10090 GN=Selenbp1 PE=1 SV=2;sp|Q63836|SBP2_MOUSE Selenium-binding protein 2 OS=Mus musculus OX=10090 GN=Selenbp2 PE=1 SV=2	1	0.0287172	18.225	1	K	NTCSSCFGDSTKSRNKLILPGLISSRIYVVD	X;X;X;X;X;X;X;X;X;X;X;X;X;X;X;Acetyl (K);X;X;X;X;X;X;X;X;X;X;X;X;X;X;X	XXXXXXXXXXXXXXPPPPPPPPPPPPXXXXX	NK(1)LILPGLISSR	2	2	-2.9		21171	21171	0	9597.9	0	0	0	0
P17563;Q63836	342;342	P17563	P17563	sp|P17563|SBP1_MOUSE Methanethiol oxidase OS=Mus musculus OX=10090 GN=Selenbp1 PE=1 SV=2;sp|Q63836|SBP2_MOUSE Selenium-binding protein 2 OS=Mus musculus OX=10090 GN=Selenbp2 PE=1 SV=2	1	0.00115479	79.005	1	K	WLHGDIRQYDISNPQKPRLAGQIFLGGSIVR	X;X;X;X;X;X;X;X;X;X;X;X;X;X;X;Acetyl (K);X;X;X;X;X;X;X;X;X;X;X;X;X;X;X	XXXXXXXPPPPPPPPPPPXXXXXXXXXXXXX	QYDISNPQK(1)PR	9	2	-0.09678		24104;24105;24106;24107	24107	78860	74714	95516	0	55298	0
P17710	243	P17710	P17710	sp|P17710|HXK1_MOUSE Hexokinase-1 OS=Mus musculus OX=10090 GN=Hk1 PE=1 SV=3	1	1.84867e-05	90.216	1	K	TKRFKASGVEGADVVKLLNKAIKKRGDYDAN	X;X;X;X;X;X;X;X;X;X;X;X;X;X;X;Acetyl (K);X;X;X;X;X;X;X;X;X;X;X;X;X;X;X	XXXXXPPPPPPPPPPPPPPPXXXXXXXXXXX	ASGVEGADVVK(1)LLNK	11	2	-2.363		2322;2323;2324;2325;2326	2326	20101	20336	0	13120	13400	12939
P17710	402	P17710	P17710	sp|P17710|HXK1_MOUSE Hexokinase-1 OS=Mus musculus OX=10090 GN=Hk1 PE=1 SV=3	1	6.94437e-26	118.59	1	K	RGKFTTSDVAAIETDKEGVQNAKEILTRLGV	X;X;X;X;X;X;X;X;X;X;X;X;X;X;X;Acetyl (K);X;X;X;X;X;X;X;X;X;X;X;X;X;X;X	XXXPPPPPPPPPPPPPPPPPPPPXXXXXXXX	FTTSDVAAIETDK(1)EGVQNAK	13	2	-2.8656		7157;7158;7159;7160;7161	7161	12520	9162.5	16349	10253	13797	0
P17710	389	P17710	P17710	sp|P17710|HXK1_MOUSE Hexokinase-1 OS=Mus musculus OX=10090 GN=Hk1 PE=1 SV=3	1	3.25218e-08	78.279	1	K	LLFEGRITPELLTRGKFTTSDVAAIETDKEG	X;X;X;X;X;X;X;X;X;X;X;X;X;X;X;Acetyl (K);X;X;X;X;X;X;X;X;X;X;X;X;Acetyl (K);X;X	XXXXXXXXXXXXXXPPPPPPPPPPPPPPPXX	GK(1)FTTSDVAAIETDK	2	2	-1.1454		8520;8521	8521	1257.4	0	4428.5	0	0	0
P17742	44	P17742	P17742	sp|P17742|PPIA_MOUSE Peptidyl-prolyl cis-trans isomerase A OS=Mus musculus OX=10090 GN=Ppia PE=1 SV=2	1	0.00117103	81.077	1	K	VPKTAENFRALSTGEKGFGYKGSSFHRIIPG	X;X;X;X;X;X;X;X;X;X;X;X;X;X;X;Acetyl (K);X;X;X;X;X;X;X;X;X;X;X;X;X;X;X	XXXXXXXXXPPPPPPPPPPPPXXXXXXXXXX	ALSTGEK(1)GFGYK	7	2	-1.6333		1723;1724;1725;1726;1727	1727	142430	0	106570	101670	102360	83288
P17742	131	P17742	P17742	sp|P17742|PPIA_MOUSE Peptidyl-prolyl cis-trans isomerase A OS=Mus musculus OX=10090 GN=Ppia PE=1 SV=2	1	0.0157972	69.367	1	K	TAKTEWLDGKHVVFGKVKEGMNIVEAMERFG	X;X;X;X;X;X;X;X;X;X;X;X;X;X;X;Acetyl (K);X;X;X;X;X;X;X;X;X;X;X;X;X;X;X	XXXXXXXXXXPPPPPPPPXXXXXXXXXXXXX	HVVFGK(1)VK	6	2	-1.0928		12173;12174;12175	12175	0	63627	0	54529	48570	0
P17742	82	P17742	P17742	sp|P17742|PPIA_MOUSE Peptidyl-prolyl cis-trans isomerase A OS=Mus musculus OX=10090 GN=Ppia PE=1 SV=2	1	4.49739e-24	144.28	1	K	FTRHNGTGGRSIYGEKFEDENFILKHTGPGI	X;X;X;X;X;X;X;X;X;X;X;X;X;X;X;Acetyl (K);X;X;X;X;X;X;X;X;X;X;X;X;X;X;X	XXXXXXXXXXPPPPPPPPPPPPPPPXXXXXX	SIYGEK(1)FEDENFILK	6	2	0.034656		25840;25841;25842;25843;25844;25845	25845	28273	51803	78664	39398	46567	29813
P17742	28	P17742	P17742	sp|P17742|PPIA_MOUSE Peptidyl-prolyl cis-trans isomerase A OS=Mus musculus OX=10090 GN=Ppia PE=1 SV=2	1	1.47593e-06	127.25	1	K	DDEPLGRVSFELFADKVPKTAENFRALSTGE	X;X;X;X;X;X;X;X;X;X;X;X;X;X;X;Acetyl (K);X;X;X;X;X;X;X;X;X;X;X;X;X;X;X	XXXXXXXPPPPPPPPPPPPXXXXXXXXXXXX	VSFELFADK(1)VPK	9	2	-2.4866		37469;37470;37471;37472;37473;37474;37475;37476	37476	94180	134900	182000	138000	99269	93388
P17751	142	P17751	P17751	sp|P17751|TPIS_MOUSE Triosephosphate isomerase OS=Mus musculus OX=10090 GN=Tpi1 PE=1 SV=5	1	7.04763e-24	156.62	1	K	CIGEKLDEREAGITEKVVFEQTKVIADNVKD	X;X;X;X;X;X;X;X;X;X;X;X;X;X;X;Acetyl (K);X;X;X;X;X;X;X;X;X;X;X;X;X;X;X	XXXXXXXXXPPPPPPPPPPPPPPXXXXXXXX	EAGITEK(1)VVFEQTK	7	2	-1.4915		4322;4323;4324;4325;4326;4327	4327	116440	116340	132010	49741	65211	49330
P17751	14	P17751	P17751	sp|P17751|TPIS_MOUSE Triosephosphate isomerase OS=Mus musculus OX=10090 GN=Tpi1 PE=1 SV=5	1	0.00471075	69.302	1	K	__MAPTRKFFVGGNWKMNGRKKCLGELICTL	X;X;X;X;X;X;X;X;X;X;X;X;X;X;X;Acetyl (K);X;X;X;X;X;X;X;X;X;X;X;X;X;X;X	XXXXXXXXPPPPPPPPPPPPXXXXXXXXXXX	FFVGGNWK(1)MNGR	8	2	1.2633		6099;6100;6101	6101	15705	11761	13364	0	0	0
P17751	194	P17751	P17751	sp|P17751|TPIS_MOUSE Triosephosphate isomerase OS=Mus musculus OX=10090 GN=Tpi1 PE=1 SV=5	1	1.48698e-69	269.74	1	K	PQQAQEVHEKLRGWLKSNVNDGVAQSTRIIY	X;X;X;X;X;X;X;X;X;Acetyl (K);X;X;X;X;X;Acetyl (K);X;X;X;X;X;X;X;X;X;X;X;X;X;X;X	XXXXXXXXXXXXPPPPPPPPPPPPPPPPXXX	GWLK(1)SNVNDGVAQSTR	4	2	-0.22714		9787;9788;9789;9790;9791;9792	9792	169580	153660	112070	75367	110950	97274
P17751	6	P17751	P17751	sp|P17751|TPIS_MOUSE Triosephosphate isomerase OS=Mus musculus OX=10090 GN=Tpi1 PE=1 SV=5	1	0.0133902	60.165	1	K	__________MAPTRKFFVGGNWKMNGRKKC	X;X;X;X;X;X;X;X;X;X;X;X;X;X;X;Acetyl (K);X;X;X;X;X;X;X;Acetyl (K);X;X;X;X;X;X;X	XXXXXXXXXXXXXXXPPPPPPPPPXXXXXXX	K(1)FFVGGNWK	1	2	-4.1713		14907;14908;14909	14909	343190	279220	293820	0	0	0
P17751	188	P17751	P17751	sp|P17751|TPIS_MOUSE Triosephosphate isomerase OS=Mus musculus OX=10090 GN=Tpi1 PE=1 SV=5	1	1.51779e-09	138.97	1	K	TGKTATPQQAQEVHEKLRGWLKSNVNDGVAQ	X;X;X;X;X;X;X;X;X;X;X;X;X;X;X;Acetyl (K);X;X;X;X;X;Acetyl (K);X;X;X;X;X;X;X;X;X	XXXPPPPPPPPPPPPPPPXXXXXXXXXXXXX	TATPQQAQEVHEK(1)LR	13	2	-1.7466		28326;28327;28328;28329;28330;28331	28331	175210	141890	132540	100580	101430	94042
Q61696;P17879;P63017;P17156	507;507;507;510	Q61696;P63017	P63017	sp|Q61696|HS71A_MOUSE Heat shock 70 kDa protein 1A OS=Mus musculus OX=10090 GN=Hspa1a PE=1 SV=2;sp|P17879|HS71B_MOUSE Heat shock 70 kDa protein 1B OS=Mus musculus OX=10090 GN=Hspa1b PE=1 SV=3;sp|P63017|HSP7C_MOUSE Heat shock cognate 71 kDa protein OS=Mus m	1	0.030646	36.946	1	K	DKSTGKANKITITNDKGRLSKEEIERMVQEA;DKSTGKENKITITNDKGRLSKEDIERMVQEA	X;X;X;X;X;X;X;X;X;X;X;X;X;X;X;Acetyl (K);X;X;X;X;X;X;X;X;X;X;X;X;X;X;X	XXXXXXXXXPPPPPPPPPXXXXXXXXXXXXX	ITITNDK(1)GR	7	2	-2.849		14348;14349;14350	14350	50529	0	34440	0	30984	0
P18242	127	P18242	P18242	sp|P18242|CATD_MOUSE Cathepsin D OS=Mus musculus OX=10090 GN=Ctsd PE=1 SV=1	1	0.00104903	81.743	1	K	ILDIACWVHHKYNSDKSSTYVKNGTSFDIHY	X;X;X;X;X;X;X;X;X;X;X;X;X;X;X;Acetyl (K);X;X;X;X;X;X;X;X;X;X;X;X;X;X;X	XXXXXXXXXXXPPPPPPPPPPPXXXXXXXXX	YNSDK(1)SSTYVK	5	2	1.0452		39697;39698	39698	0	53522	0	0	25849	0
P18572	239	P18572	P18572	sp|P18572|BASI_MOUSE Basigin OS=Mus musculus OX=10090 GN=Bsg PE=1 SV=2	1	0.0156302	73.85	1	K	KVGKKSEHSSEGELAKLVCKSDASYPPITDW	X;X;X;X;X;X;X;X;X;X;X;X;X;X;X;Acetyl (K);X;X;X;X;X;X;X;X;X;X;X;X;X;X;X	XXXXXPPPPPPPPPPPPPPPXXXXXXXXXXX	SEHSSEGELAK(1)LVCK	11	2	2.7627		24882	24882	43035	0	0	0	0	0
P18608	26	P18608	P18608	sp|P18608|HMGN1_MOUSE Non-histone chromosomal protein HMG-14 OS=Mus musculus OX=10090 GN=Hmgn1 PE=1 SV=2	1	0.0220216	43.932	1	K	AAKAEPKRRSARLSAKPAPAKVDAKPKKAAG	X;X;X;X;X;X;X;X;X;X;X;X;X;X;X;Acetyl (K);X;X;X;X;X;X;X;X;X;X;X;X;X;X;X	XXXXXXXXXXXXPPPPPPPPPXXXXXXXXXX	LSAK(1)PAPAK	4	2	-1.4219		18464;18465;18466;18467;18468	18468	0	23465	18182	14150	16295	19300
P18760;P45591	19;19	P18760;P45591	P45591	sp|P18760|COF1_MOUSE Cofilin-1 OS=Mus musculus OX=10090 GN=Cfl1 PE=1 SV=3;sp|P45591|COF2_MOUSE Cofilin-2 OS=Mus musculus OX=10090 GN=Cfl2 PE=1 SV=1	1	0.021438	50.813	1	K	GVAVSDGVIKVFNDMKVRKSSTPEEVKKRKK;GVTVNDEVIKVFNDMKVRKSSTQEEIKKRKK	X;X;X;X;X;X;X;X;X;X;X;X;X;X;X;Acetyl (K);X;X;X;X;X;X;X;X;X;X;X;X;X;X;X	XXXXXXXXXXPPPPPPPPXXXXXXXXXXXXX	VFNDMK(1)VR	6	2	-1.3516		36064;36065	36065	0	0	17946	0	24284	0
P18760;P45591	92;92	P18760;P45591	P45591	sp|P18760|COF1_MOUSE Cofilin-1 OS=Mus musculus OX=10090 GN=Cfl1 PE=1 SV=3;sp|P45591|COF2_MOUSE Cofilin-2 OS=Mus musculus OX=10090 GN=Cfl2 PE=1 SV=1	1	1.25009e-11	147.32	1	K	DKDCRYALYDATYETKESKKEDLVFIFWAPE;LNDCRYALYDATYETKESKKEDLVFIFWAPE	X;X;X;X;X;X;X;X;X;X;X;X;X;X;X;Acetyl (K);X;X;X;X;X;X;X;X;X;X;X;X;X;X;X	XXXXXPPPPPPPPPPPPPPXXXXXXXXXXXX	YALYDATYETK(1)ESK	11	2	0.039153		38853;38854;38855;38856	38856	38261	37620	10292	0	12801	0
P19096	1234	P19096	P19096	sp|P19096|FAS_MOUSE Fatty acid synthase OS=Mus musculus OX=10090 GN=Fasn PE=1 SV=2	1	4.45882e-19	172.59	1	K	LKACVDTALENLSTLKMKVAEVLAGEGHLYS	X;X;X;X;X;X;X;X;X;X;X;X;X;X;X;Acetyl (K);X;X;X;X;X;X;X;X;X;X;X;X;X;X;X	XXPPPPPPPPPPPPPPPPXXXXXXXXXXXXX	ACVDTALENLSTLK(1)MK	14	2	-1.9774		402;403;404;405	405	0	0	62043	60799	9853.7	13670
P19096	1575	P19096	P19096	sp|P19096|FAS_MOUSE Fatty acid synthase OS=Mus musculus OX=10090 GN=Fasn PE=1 SV=2	1	6.54441e-38	199.12	1	K	YYASLNFRDIMLATGKLSPDAIPGKWASRDC	X;X;X;X;X;X;X;X;X;X;Oxidation (M);X;X;X;X;Acetyl (K);X;X;X;X;X;X;X;X;X;X;X;X;X;X;X	XXXXXXXXPPPPPPPPPPPPPPPPPXXXXXX	DIMLATGK(1)LSPDAIPGK	8	2	-0.90556		3728;3729;3730;3731;3732;3733;3734;3735	3735	42047	79426	339100	395590	76642	97230
P19096	59	P19096	P19096	sp|P19096|FAS_MOUSE Fatty acid synthase OS=Mus musculus OX=10090 GN=Fasn PE=1 SV=2	1	1.59891e-06	100	1	K	LYGLPKRSGKLKDLSKFDASFFGVHPKQAHT	X;X;X;X;X;X;X;X;X;X;X;X;X;X;X;Acetyl (K);X;X;X;X;X;X;X;X;X;X;X;X;X;X;X	XXXXXXXXXXXXPPPPPPPPPPPPPPPXXXX	DLSK(1)FDASFFGVHPK	4	2	0.59556		3897;3898;3899	3899	0	0	41069	27440	0	5098.2
P19096	1516	P19096	P19096	sp|P19096|FAS_MOUSE Fatty acid synthase OS=Mus musculus OX=10090 GN=Fasn PE=1 SV=2	1	0.00707378	65.517	1	K	DGAWGAFRHFQLEQDKPKEQTAHAFVNVLTR	X;X;X;X;X;X;X;X;X;X;X;X;X;X;X;Acetyl (K);X;X;X;X;X;X;X;X;X;X;X;X;X;X;X	XXXXXXXXPPPPPPPPPPXXXXXXXXXXXXX	HFQLEQDK(1)PK	8	2	-1.2604		10336	10336	0	0	0	37831	0	0
P19096	1276	P19096	P19096	sp|P19096|FAS_MOUSE Fatty acid synthase OS=Mus musculus OX=10090 GN=Fasn PE=1 SV=2	1	9.81693e-07	128.46	1	K	LQLEYTATDRHPQALKDVQTKLQQHDVAQGQ	X;X;X;X;X;X;X;X;X;X;X;X;X;X;X;Acetyl (K);X;X;X;X;X;X;X;X;X;X;X;X;X;X;X	XXXXXXXXXXPPPPPPPPPPPXXXXXXXXXX	HPQALK(1)DVQTK	6	2	-1.6657		11598;11599	11599	0	0	26693	17408	0	0
P19096	993	P19096	P19096	sp|P19096|FAS_MOUSE Fatty acid synthase OS=Mus musculus OX=10090 GN=Fasn PE=1 SV=2	1	0.000186943	102.91	1	K	PESASVSRLTQGEVYKELRLRGYDYGPQFQG	X;X;X;X;X;X;X;X;X;X;X;X;X;X;X;Acetyl (K);X;X;X;X;X;X;X;X;X;X;X;X;X;X;X	XXXXXXXXPPPPPPPPPPPXXXXXXXXXXXX	LTQGEVYK(1)ELR	8	2	-3.6696		18899	18899	0	0	80186	0	0	0
P19096	673	P19096	P19096	sp|P19096|FAS_MOUSE Fatty acid synthase OS=Mus musculus OX=10090 GN=Fasn PE=1 SV=2	1	0.00117059	70.359	1	K	VNEFVEQLKQEGVFAKEVRTGGLAFHSYFME	X;X;X;X;X;X;X;X;X;X;X;X;X;X;X;Acetyl (K);X;X;X;X;X;X;X;X;X;X;X;X;X;X;X	XXXXXXXXXPPPPPPPPPPXXXXXXXXXXXX	QEGVFAK(1)EVR	7	2	-1.529		23243;23244;23245	23245	25925	0	120520	146910	0	0
P19096	489	P19096	P19096	sp|P19096|FAS_MOUSE Fatty acid synthase OS=Mus musculus OX=10090 GN=Fasn PE=1 SV=2	1	5.26956e-05	135.96	1	K	GVEGRVQEVQQVSTNKRPLWFICSGMGTQWR	X;X;X;X;X;X;X;X;X;X;X;X;X;X;X;Acetyl (K);X;X;X;X;X;X;X;X;X;X;X;X;X;X;X	XXXXXPPPPPPPPPPPPXXXXXXXXXXXXXX	VQEVQQVSTNK(1)R	11	2	0.44915		37399	37399	0	0	0	30370	0	0
P19157	103	P19157	P19157	sp|P19157|GSTP1_MOUSE Glutathione S-transferase P 1 OS=Mus musculus OX=10090 GN=Gstp1 PE=1 SV=2	1	2.92034e-06	92.627	1	K	AQMDMVNDGVEDLRGKYVTLIYTNYENGKND	X;X;X;X;X;X;X;X;X;X;X;X;X;X;X;Acetyl (K);X;X;X;X;X;X;X;X;X;X;X;X;X;X;X	XXXXXXXXXXXXXXPPPPPPPPPPPPPPPXX	GK(1)YVTLIYTNYENGK	2	2	1.0939		8574;8575;8576;8577	8577	0	12115	13996	0	10740	3817.4
P19253	191	P19253	P19253	sp|P19253|RL13A_MOUSE 60S ribosomal protein L13a OS=Mus musculus OX=10090 GN=Rpl13a PE=1 SV=4	1	0.00819525	82.107	1	K	RLRKQAEKNVEKKICKFTEVLKTNGLLV___	X;X;X;X;X;X;X;X;X;X;X;X;X;X;X;Acetyl (K);X;X;X;X;X;X;X;X;X;X;X;X;X;X;X	XXXXXXXXXXXXXPPPPPPPPPXXXXXXXXX	ICK(1)FTEVLK	3	2	-1.654		12662;12663	12663	6081.7	0	3354.4	0	0	0
P19536	85	P19536	P19536	sp|P19536|COX5B_MOUSE Cytochrome c oxidase subunit 5B, mitochondrial OS=Mus musculus OX=10090 GN=Cox5b PE=1 SV=1	1	0.00084552	96.531	1	K	SGTKEDPNLVPSISNKRIVGCICEEDNCTVI	X;X;X;X;X;X;X;X;X;X;X;X;X;X;X;Acetyl (K);X;X;X;X;X;X;X;X;X;X;X;X;X;X;X	XXXXPPPPPPPPPPPPPXXXXXXXXXXXXXX	EDPNLVPSISNK(1)R	12	2	1.0761		4484;4485;4486;4487;4488;4489	4489	1562800	1605500	1730600	1469100	1532200	1511900
P19783	29	P19783	P19783	sp|P19783|COX41_MOUSE Cytochrome c oxidase subunit 4 isoform 1, mitochondrial OS=Mus musculus OX=10090 GN=Cox4i1 PE=1 SV=2	1	0.00365438	42.151	1	K	AISTSVCLRAHGSVVKSEDYAFPTYADRRDY	X;X;X;X;X;X;X;X;X;X;X;X;X;X;X;Acetyl (K);X;X;X;X;X;X;X;X;X;X;X;X;X;X;X	XXXXXXXXXPPPPPPPPPPPPPPPPPPPXXX	AHGSVVK(1)SEDYAFPTYADR	7	2	-0.63505		1114	1114	8622.2	0	0	0	0	0
P19783	78	P19783	P19783	sp|P19783|COX41_MOUSE Cytochrome c oxidase subunit 4 isoform 1, mitochondrial OS=Mus musculus OX=10090 GN=Cox4i1 PE=1 SV=2	1	0.000156033	79.066	1	K	KEKEKADWSSLSRDEKVQLYRIQFNESFAEM	X;X;X;X;Acetyl (K);X;X;X;X;X;X;X;X;X;X;Acetyl (K);X;X;X;X;X;X;X;X;X;X;X;X;X;X;Oxidation (M)	XXXXXXXXXXXXXPPPPPPPPXXXXXXXXXX	DEK(1)VQLYR	3	2	-0.65034		3479;3480;3481;3482;3483;3484	3484	119300	119120	164970	150010	213160	158660
P19783	143	P19783	P19783	sp|P19783|COX41_MOUSE Cytochrome c oxidase subunit 4 isoform 1, mitochondrial OS=Mus musculus OX=10090 GN=Cox4i1 PE=1 SV=2	1	0.000668031	78.735	1	K	PIPHTFDRDWVAMQTKRMLDMKANPIQGFSA	X;X;X;X;X;X;X;X;X;X;X;X;X;X;X;Acetyl (K);X;X;X;X;X;X;X;X;X;X;X;X;X;X;X	XXXXXXXXPPPPPPPPPXXXXXXXXXXXXXX	DWVAMQTK(1)R	8	2	4.3805		4236;4237;4238;4239	4239	89186	55246	22697	0	29054	0
P19783	60	P19783	P19783	sp|P19783|COX41_MOUSE Cytochrome c oxidase subunit 4 isoform 1, mitochondrial OS=Mus musculus OX=10090 GN=Cox4i1 PE=1 SV=2	1	2.3498e-13	141.55	1	K	PLPDVAHVTMLSASQKALKEKEKADWSSLSR	X;X;X;X;X;X;X;X;X;Oxidation (M);X;X;X;X;X;Acetyl (K);X;X;X;X;X;X;Acetyl (K);X;X;X;X;X;X;X;X	PPPPPPPPPPPPPPPPPPPXXXXXXXXXXXX	RDYPLPDVAHVTMLSASQK(1)ALK	19	3	1.0372		4258;4259;4260;4261;4262;4263;4264;4265;4266;4267;4268;4269;4270;4271;4272;4273;4274;4275;4276;4277;4278;24170;24171;24172;24173	24173	268270	536350	494280	248200	587940	514020
P19783	67	P19783	P19783	sp|P19783|COX41_MOUSE Cytochrome c oxidase subunit 4 isoform 1, mitochondrial OS=Mus musculus OX=10090 GN=Cox4i1 PE=1 SV=2	1	9.00603e-25	151.67	1	K	VTMLSASQKALKEKEKADWSSLSRDEKVQLY	X;X;Oxidation (M);X;X;X;X;X;Acetyl (K);X;X;X;X;X;X;Acetyl (K);X;X;X;X;X;X;X;X;X;X;Acetyl (K);X;X;X;X	XXXXXXXXXXXXXXPPPPPPPPPPXXXXXXX	EK(1)ADWSSLSR	2	2	0.60467		4905;4906;4907;4908;4909;4910	4910	1025100	975180	1387100	393030	732460	754650
P19783	164	P19783	P19783	sp|P19783|COX41_MOUSE Cytochrome c oxidase subunit 4 isoform 1, mitochondrial OS=Mus musculus OX=10090 GN=Cox4i1 PE=1 SV=2	1	9.43929e-15	149.84	1	K	KANPIQGFSAKWDYDKNEWKK__________	X;X;X;X;X;X;X;X;X;X;X;X;X;X;X;Acetyl (K);X;X;X;X;X;X;X;X;X;X;X;X;X;X;X	XXXXXXXXXXXPPPPPPPPPXXXXXXXXXXX	WDYDK(1)NEWK	5	2	2.183		38319;38320;38321;38322;38323;38324	38324	307500	319700	254030	240470	273150	192150
P19783	168	P19783	P19783	sp|P19783|COX41_MOUSE Cytochrome c oxidase subunit 4 isoform 1, mitochondrial OS=Mus musculus OX=10090 GN=Cox4i1 PE=1 SV=2	1	3.45954e-05	99.584	1	K	IQGFSAKWDYDKNEWKK______________	X;X;X;X;X;X;X;X;X;X;X;X;X;X;X;Acetyl (K);X;X;X;X;X;X;X;X;X;X;X;X;X;X;X	XXXXXXXPPPPPPPPPPXXXXXXXXXXXXXX	WDYDKNEWK(1)K	9	2	-1.1468		38325;38326;38327;38328;38329	38325	165060	0	51505	46843	71275	50699
P20065	45	P20065	P20065	sp|P20065|TYB4_MOUSE Thymosin beta-4 OS=Mus musculus OX=10090 GN=Tmsb4x PE=1 SV=1	1	0.000498767	133.69	1	K	QEKNPLPSKETIEQEKQAGES__________	X;X;Acetyl (K);X;X;X;X;X;X;X;X;X;X;X;X;Acetyl (K);X;X;X;X;X;X;X;X;X;X;X;X;X;X;X	XXXXXXXXXPPPPPPPPPPPPXXXXXXXXXX	ETIEQEK(1)QAGES	7	2	-0.6862		5398;5399;5400	5400	41012	22702	0	0	12009	0
P20065	32	P20065	P20065	sp|P20065|TYB4_MOUSE Thymosin beta-4 OS=Mus musculus OX=10090 GN=Tmsb4x PE=1 SV=1	1	7.21783e-10	139.98	1	K	EKFDKSKLKKTETQEKNPLPSKETIEQEKQA	X;X;X;X;X;X;X;X;X;X;X;X;X;X;X;Acetyl (K);X;X;X;X;X;X;X;X;X;X;X;X;Acetyl (K);X;X	XXXXXXXXXPPPPPPPPPPPPPXXXXXXXXX	TETQEK(1)NPLPSK	6	2	-1.4355		15218;29128;29129;29130;29131;29132;29133	29133	145400	109040	27534	30022	38317	19981
P20108	92	P20108	P20108	sp|P20108|PRDX3_MOUSE Thioredoxin-dependent peroxide reductase, mitochondrial OS=Mus musculus OX=10090 GN=Prdx3 PE=1 SV=1	1	3.23897e-05	98.635	1	K	AVVNGEFKELSLDDFKGKYLVLFFYPLDFTF	X;X;X;X;X;X;X;X;X;X;X;X;X;X;X;Acetyl (K);X;X;X;X;X;X;X;X;X;X;X;X;X;X;X	XXXXXXXXPPPPPPPPPPXXXXXXXXXXXXX	ELSLDDFK(1)GK	8	2	-2.5097		5134;5135;5136;5137;5138;5139	5139	647010	553460	710280	337480	585240	624500
P20108	84	P20108	P20108	sp|P20108|PRDX3_MOUSE Thioredoxin-dependent peroxide reductase, mitochondrial OS=Mus musculus OX=10090 GN=Prdx3 PE=1 SV=1	1	3.57188e-73	228.22	1	K	HAPYFKGTAVVNGEFKELSLDDFKGKYLVLF	X;X;X;X;X;X;X;X;X;X;X;X;X;X;X;Acetyl (K);X;X;X;X;X;X;X;Acetyl (K);X;X;X;X;X;X;X	XXXXXXPPPPPPPPPPPPPPPPPPXXXXXXX	GTAVVNGEFK(1)ELSLDDFK	10	2	-0.68987		9388;9389;9390;9391;9392;9393	9393	46315	115180	252410	102010	114500	86022
P21107;P58771	71;70	P21107;P58771	P58771	sp|P21107|TPM3_MOUSE Tropomyosin alpha-3 chain OS=Mus musculus OX=10090 GN=Tpm3 PE=1 SV=3;sp|P58771|TPM1_MOUSE Tropomyosin alpha-1 chain OS=Mus musculus OX=10090 GN=Tpm1 PE=1 SV=1	1	0.00328795	68.473	1	K	DELDKYSEALKDAQEKLELAEKKAADAEAEV;DELDKYSEALKDAQEKLELAEKKATDAEADV	X;X;X;X;X;X;X;X;X;X;X;X;X;X;X;Acetyl (K);X;X;X;X;X;X;X;X;X;X;X;X;X;X;X	XXXXXXXXXXXPPPPPPPPPPPXXXXXXXXX	DAQEK(1)LELAEK	5	2	-0.60424		3366	3366	37547	0	0	0	0	0
P21107;P58771;P58774;CON__Q3SX28	113;112;112;112	P21107;P58771	P58771	sp|P21107|TPM3_MOUSE Tropomyosin alpha-3 chain OS=Mus musculus OX=10090 GN=Tpm3 PE=1 SV=3;sp|P58771|TPM1_MOUSE Tropomyosin alpha-1 chain OS=Mus musculus OX=10090 GN=Tpm1 PE=1 SV=1;sp|P58774|TPM2_MOUSE Tropomyosin beta chain OS=Mus musculus OX=10090 GN=Tpm2	1	2.48785e-10	125.24	1	K	EELDRAQERLATALQKLEEAEKAADESERGM	X;X;X;X;X;X;X;X;X;X;X;X;X;X;X;Acetyl (K);X;X;X;X;X;Acetyl (K);X;X;X;X;X;X;X;X;X	XXXXXXXXXPPPPPPPPPPPPPXXXXXXXXX	LATALQK(1)LEEAEK	7	2	-0.91027		15547	15547	22874	0	0	0	0	0
P21107;P58771;P58774;CON__Q3SX28	119;118;118;118	P21107;P58771	P58771	sp|P21107|TPM3_MOUSE Tropomyosin alpha-3 chain OS=Mus musculus OX=10090 GN=Tpm3 PE=1 SV=3;sp|P58771|TPM1_MOUSE Tropomyosin alpha-1 chain OS=Mus musculus OX=10090 GN=Tpm1 PE=1 SV=1;sp|P58774|TPM2_MOUSE Tropomyosin beta chain OS=Mus musculus OX=10090 GN=Tpm2	1	8.03701e-07	157.54	1	K	QERLATALQKLEEAEKAADESERGMKVIENR;QERLATALQKLEEAEKAADESERGMKVIESR	X;X;X;X;X;X;X;X;X;X;X;X;X;X;X;Acetyl (K);X;X;X;X;X;X;X;X;X;X;X;X;X;X;X	XXXXXXXXXXPPPPPPPPPPPPPXXXXXXXX	LEEAEK(1)AADESER	6	2	-0.67277		15847;15848;15849;15850;15851;15852	15852	45822	8259.9	6756.6	12415	14316	3571.3
P21107;P58771	214;213	P21107;P58771	P58771	sp|P21107|TPM3_MOUSE Tropomyosin alpha-3 chain OS=Mus musculus OX=10090 GN=Tpm3 PE=1 SV=3;sp|P58771|TPM1_MOUSE Tropomyosin alpha-1 chain OS=Mus musculus OX=10090 GN=Tpm1 PE=1 SV=1	1	1.79808e-22	147.52	1	K	KNVTNNLKSLEAQAEKYSQKEDKYEEEIKIL;KTVTNNLKSLEAQAEKYSQKEDKYEEEIKVL	X;X;X;X;X;X;X;X;X;X;X;X;X;X;X;Acetyl (K);X;X;X;X;X;X;Acetyl (K);X;X;X;X;X;X;X;X	XXXXXXXXPPPPPPPPPPPPXXXXXXXXXXX	SLEAQAEK(1)YSQK	8	2	0.27531		25962;25963;25964;25965;25966;25967	25967	210030	37232	34172	24414	57839	11228
P21550	5	P21550	P21550	sp|P21550|ENOB_MOUSE Beta-enolase OS=Mus musculus OX=10090 GN=Eno3 PE=1 SV=3	1	0.00046336	73.778	1	K	___________MAMQKIFAREILDSRGNPTV	X;X;X;X;X;X;X;X;X;X;X;X;X;X;X;Acetyl (K);X;X;X;X;X;X;X;X;X;X;X;X;X;X;X	XXXXXXXXXXXXPPPPPPPPXXXXXXXXXXX	AMQK(1)IFAR	4	2	-2.175		1891;1892;1893;1894;1895	1895	407340	0	663380	387680	586710	215640
P21550	71	P21550	P21550	sp|P21550|ENOB_MOUSE Beta-enolase OS=Mus musculus OX=10090 GN=Eno3 PE=1 SV=3	1	2.3117e-06	51.482	1	K	RYLGKGVLKAVEHINKTLGPALLEKKLSVVD	X;X;X;X;X;X;X;X;X;X;X;X;X;X;X;Acetyl (K);X;X;X;X;X;X;X;X;Acetyl (K);X;X;X;X;X;X	XXXXXXXXXPPPPPPPPPPPPPPPPXXXXXX	AVEHINK(1)TLGPALLEK	7	2	0.10069		2659;2660;2661;2662	2662	0	21957	17215	0	12748	10121
P21550	28	P21550	P21550	sp|P21550|ENOB_MOUSE Beta-enolase OS=Mus musculus OX=10090 GN=Eno3 PE=1 SV=3	1	5.9368e-17	141.37	1	K	DSRGNPTVEVDLHTAKGRFRAAVPSGASTGI	X;X;X;X;X;X;X;X;X;X;X;X;X;X;X;Acetyl (K);X;X;X;X;X;X;X;X;X;X;X;X;X;X;X	XXXPPPPPPPPPPPPPPPXXXXXXXXXXXXX	GNPTVEVDLHTAK(1)GR	13	2	0.82381		9014;9015;9016;9017;9018	9018	6596.6	12999	20663	11714	15059	0
P21550	64	P21550	P21550	sp|P21550|ENOB_MOUSE Beta-enolase OS=Mus musculus OX=10090 GN=Eno3 PE=1 SV=3	1	0.000444046	76.977	1	K	LRDGDKARYLGKGVLKAVEHINKTLGPALLE	X;X;X;X;X;X;X;X;X;X;X;X;X;X;X;Acetyl (K);X;X;X;X;X;X;Acetyl (K);X;X;X;X;X;X;X;X	XXXXXXXXXXXXPPPPPPPPPPPXXXXXXXX	GVLK(1)AVEHINK	4	2	-0.89906		9649;9650;9651;9652;9653;9654	9654	65384	95759	88215	65498	82891	58637
P21550	275	P21550	P21550	sp|P21550|ENOB_MOUSE Beta-enolase OS=Mus musculus OX=10090 GN=Eno3 PE=1 SV=3	1	2.31475e-06	116.54	1	K	DFKSPDDPARHISGEKLGELYKNFIQNYPVV	X;X;X;X;X;X;X;X;X;X;X;X;X;X;X;Acetyl (K);X;X;X;X;X;X;X;X;X;X;X;X;X;X;X	XXXXXXXXXXPPPPPPPPPPPPXXXXXXXXX	HISGEK(1)LGELYK	6	2	0.70953		10894;10895;10896;10897;10898;10899;10900	10900	127200	132460	162440	99875	139740	45104
P21550	420	P21550	P21550	sp|P21550|ENOB_MOUSE Beta-enolase OS=Mus musculus OX=10090 GN=Eno3 PE=1 SV=3	1	6.04009e-23	163.39	1	K	AKYNQLMRIEEALGDKAVFAGRKFRNPKAK_	X;X;X;X;X;X;X;X;X;X;X;X;X;X;X;Acetyl (K);X;X;X;X;X;X;X;X;X;X;X;X;X;X;X	XXXXXXXXPPPPPPPPPPPPPPXXXXXXXXX	IEEALGDK(1)AVFAGR	8	2	-2.4106		12783;12784;12785;12786;12787;12788	12788	99596	106930	140610	86750	101110	57623
P21550	193	P21550	P21550	sp|P21550|ENOB_MOUSE Beta-enolase OS=Mus musculus OX=10090 GN=Eno3 PE=1 SV=3	1	6.20298e-06	93.557	1	K	FKEAMRIGAEVYHHLKGVIKAKYGKDATNVG	X;X;X;X;X;X;X;X;X;X;X;X;X;X;X;Acetyl (K);X;X;X;X;X;X;X;X;X;X;X;X;X;X;X	XXXXXXPPPPPPPPPPPPPPXXXXXXXXXXX	IGAEVYHHLK(1)GVIK	10	2	0.69577		12971;12972;12973;12974;12975	12975	16106	37715	29318	0	38191	28490
P21550	89	P21550	P21550	sp|P21550|ENOB_MOUSE Beta-enolase OS=Mus musculus OX=10090 GN=Eno3 PE=1 SV=3	1	7.28553e-07	99.448	1	K	GPALLEKKLSVVDQEKVDKFMIELDGTENKS	X;X;X;X;X;X;Acetyl (K);X;X;X;X;X;X;X;X;Acetyl (K);X;X;X;X;X;X;X;X;X;X;X;X;X;X;X	XXXXXXXPPPPPPPPPPPPXXXXXXXXXXXX	LSVVDQEK(1)VDK	8	2	-0.33501		15153;18736;18737;18738;18739;18740;18741	18741	189570	183520	244080	145700	174300	143700
P21550	256	P21550	P21550	sp|P21550|ENOB_MOUSE Beta-enolase OS=Mus musculus OX=10090 GN=Eno3 PE=1 SV=3	1	0.00411037	77.775	1	K	VIGMDVAASEFYRNGKYDLDFKSPDDPARHI	X;X;X;X;X;X;X;X;X;X;X;X;X;X;X;Acetyl (K);X;X;X;X;X;X;X;X;X;X;X;X;X;X;X	XXXXXXXXXXXXXPPPPPPPPPPPPPPPPXX	NGK(1)YDLDFK	3	2	-1.0926		20940;20941;20942;20943;20944	20943	34727	27323	35549	25715	0	0
P21981	30	P21981	P21981	sp|P21981|TGM2_MOUSE Protein-glutamine gamma-glutamyltransferase 2 OS=Mus musculus OX=10090 GN=Tgm2 PE=1 SV=4	1	3.94576e-07	93.171	1	K	QANGRDHHTADLCQEKLVLRRGQRFRLTLYF	X;X;X;X;X;X;X;X;X;X;X;X;X;X;X;Acetyl (K);X;X;X;X;X;X;X;X;X;X;X;X;X;X;X	XXXXXPPPPPPPPPPPPPPPXXXXXXXXXXX	DHHTADLCQEK(1)LVLR	11	2	-1.6193		3674;3675;3676;3677;3678;3679;3680;3681;3682;3683	3683	13493	13982	20071	9595.1	9217.8	0
P21981	589	P21981	P21981	sp|P21981|TGM2_MOUSE Protein-glutamine gamma-glutamyltransferase 2 OS=Mus musculus OX=10090 GN=Tgm2 PE=1 SV=4	1	0.0245606	40.701	1	K	YLLAERDLYLENPEIKIRVLGEPKQNRKLVA	X;X;X;X;X;X;X;X;X;X;X;X;X;X;X;Acetyl (K);X;X;X;X;X;X;X;X;X;X;X;X;X;X;X	XXXXXXPPPPPPPPPPPPXXXXXXXXXXXXX	DLYLENPEIK(1)IR	10	2	-2.1768		3912;3913;3914	3914	10081	7430.8	19273	0	0	0
P21981	414	P21981	P21981	sp|P21981|TGM2_MOUSE Protein-glutamine gamma-glutamyltransferase 2 OS=Mus musculus OX=10090 GN=Tgm2 PE=1 SV=4	1	0.000598727	105.92	1	K	ADVVDWIRQEDGSVLKSINRSLVVGQKISTK	X;X;X;X;X;X;X;X;X;X;X;X;X;X;X;Acetyl (K);X;X;X;X;X;X;X;X;X;X;X;X;X;X;X	XXXXXXXXPPPPPPPPPPPPXXXXXXXXXXX	QEDGSVLK(1)SINR	8	2	-0.91722		23233;23234;23235	23235	94690	0	0	40647	108930	0
P21981	648	P21981	P21981	sp|P21981|TGM2_MOUSE Protein-glutamine gamma-glutamyltransferase 2 OS=Mus musculus OX=10090 GN=Tgm2 PE=1 SV=4	1	1.51118e-18	120.41	1	K	KSVEVSDPVPAGDLVKARVDLFPTDIGLHKL	X;X;X;X;X;X;X;X;X;X;X;X;X;X;X;Acetyl (K);X;X;X;X;X;X;X;X;X;X;X;X;X;X;X	XPPPPPPPPPPPPPPPPPXXXXXXXXXXXXX	SVEVSDPVPAGDLVK(1)AR	15	2	-2.9298		27440;27441;27442;27443;27444;27445	27445	71072	59325	69869	67496	63970	55721
P22315	142	P22315	P22315	sp|P22315|HEMH_MOUSE Ferrochelatase, mitochondrial OS=Mus musculus OX=10090 GN=Fech PE=1 SV=2	1	2.09278e-22	137.55	1	K	SPIKMWTSKQGEGMVKLLDELSPATAPHKYY	X;X;X;X;X;X;X;X;X;X;X;X;X;X;X;Acetyl (K);X;X;X;X;X;X;X;X;X;X;X;X;X;X;X	XXXXXXXXXPPPPPPPPPPPPPPPPPPPPXX	QGEGMVK(1)LLDELSPATAPHK	7	2	-1.5882		23362;23363;23364	23364	0	14757	0	0	11226	11213
P22315	287	P22315	P22315	sp|P22315|HEMH_MOUSE Ferrochelatase, mitochondrial OS=Mus musculus OX=10090 GN=Fech PE=1 SV=2	1	0.000650579	91.173	1	K	PYPQEVGATVHKVMEKLGYPNPYRLVWQSKV	X;X;X;X;X;X;X;X;X;X;X;X;X;X;X;Acetyl (K);X;X;X;X;X;X;X;X;X;X;X;X;X;X;X	XXXXXXXXXXXXPPPPPPPPPPPPXXXXXXX	VMEK(1)LGYPNPYR	4	2	-3.1283		37126;37127;37128;37129;37130;37131	37131	172400	165080	171060	142190	180400	187590
P22315	213	P22315	P22315	sp|P22315|HEMH_MOUSE Ferrochelatase, mitochondrial OS=Mus musculus OX=10090 GN=Fech PE=1 SV=2	1	0.000385562	127.72	1	K	SSLNAIYRYYNEVGQKPTMKWSTIDRWPTHP	X;X;X;X;X;X;X;X;X;X;X;X;X;X;X;Acetyl (K);X;X;X;X;X;X;X;X;X;X;X;X;X;X;X	XXXXXXXXPPPPPPPPPPPPXXXXXXXXXXX	YYNEVGQK(1)PTMK	8	2	-0.67773		40106;40107;40108;40109;40110	40110	5947.1	0	11024	11467	16047	20532
P22599	292	P22599	P22599	sp|P22599|A1AT2_MOUSE Alpha-1-antitrypsin 1-2 OS=Mus musculus OX=10090 GN=Serpina1b PE=1 SV=2	1	1.16384e-17	126.77	1	K	KMQHLEQTLNKELISKILLNRRRRLVQIHIP	X;X;X;X;X;X;X;X;X;X;X;X;X;X;X;Acetyl (K);X;X;X;X;X;X;X;X;X;X;X;X;X;X;X	XXXXXXXXXXXPPPPPPPPPPXXXXXXXXXX	ELISK(1)ILLNR	5	2	-1.4792		5088;5089;5090;5091;5092;5093	5093	738940	573950	967020	481330	1145000	736330
P23242	136	P23242	P23242	sp|P23242|CXA1_MOUSE Gap junction alpha-1 protein OS=Mus musculus OX=10090 GN=Gja1 PE=1 SV=2	1	0.000853453	80.809	1	K	VNVEMHLKQIEIKKFKYGIEEHGKVKMRGGL	X;X;X;X;X;X;X;X;X;X;X;X;X;X;X;Acetyl (K);X;X;X;X;X;X;X;X;X;X;X;X;X;X;X	XXXXXXXXXXXXXXPPPPPPPPPPXXXXXXX	FK(1)YGIEEHGK	2	2	-2.3581		6434;6435	6435	39148	0	18107	0	0	0
P23242	9	P23242	P23242	sp|P23242|CXA1_MOUSE Gap junction alpha-1 protein OS=Mus musculus OX=10090 GN=Gja1 PE=1 SV=2	1	0.000379869	66.163	1	K	_______MGDWSALGKLLDKVQAYSTAGGKV	X;X;X;X;X;X;X;X;X;X;X;X;X;X;X;Acetyl (K);X;X;X;X;X;X;X;X;X;X;X;X;X;X;X	XXXXXXXXPPPPPPPPPPPPXXXXXXXXXXX	GDWSALGK(1)LLDK	8	2	0.60808		7711;7712;7713	7713	9296.5	11727	0	0	8505.8	0
P23506	124	P23506	P23506	sp|P23506|PIMT_MOUSE Protein-L-isoaspartate(D-aspartate) O-methyltransferase OS=Mus musculus OX=10090 GN=Pcmt1 PE=1 SV=3	1	2.26658e-06	117.09	1	K	IDHIKELVDDSITNVKKDDPMLLSSGRVRLV	X;X;X;X;X;X;X;X;X;X;X;X;X;X;X;Acetyl (K);X;X;X;X;X;X;X;X;X;X;X;X;X;X;X	XXXXXPPPPPPPPPPPPXXXXXXXXXXXXXX	ELVDDSITNVK(1)K	11	2	-1.3346		5150;5151;5152	5152	38155	49924	54099	0	0	0
P23927	166	P23927	P23927	sp|P23927|CRYAB_MOUSE Alpha-crystallin B chain OS=Mus musculus OX=10090 GN=Cryab PE=1 SV=2	1	0.00275327	72.954	1	K	QVSGPERTIPITREEKPAVAAAPKK______	X;X;X;X;X;X;X;X;X;X;X;X;X;X;X;Acetyl (K);X;X;X;X;X;X;X;X;X;X;X;X;X;X;X	XXXXXXXXXXXXXPPPPPPPPPPPXXXXXXX	EEK(1)PAVAAAPK	3	2	-0.55179		4582;4583;4584	4584	317730	0	0	0	0	35858
P23927	90	P23927	P23927	sp|P23927|CRYAB_MOUSE Alpha-crystallin B chain OS=Mus musculus OX=10090 GN=Cryab PE=1 SV=2	1	0.00029497	90.879	1	K	FSVNLDVKHFSPEELKVKVLGDVIEVHGKHE	X;X;X;X;X;X;X;X;X;X;X;X;X;X;X;Acetyl (K);X;X;X;X;X;X;X;X;X;X;X;X;X;X;X	XXXXXXXXPPPPPPPPPPXXXXXXXXXXXXX	HFSPEELK(1)VK	8	2	-1.5367		10374;10375;10376;10377;10378	10378	465130	0	205150	118930	200680	94013
P24270	499	P24270	P24270	sp|P24270|CATA_MOUSE Catalase OS=Mus musculus OX=10090 GN=Cat PE=1 SV=4	0.999999	1.01135e-05	93.624	1	K	DVHPDYGARIQALLDKYNAEKPKNAIHTYTQ	X;X;X;X;X;X;X;X;X;X;X;X;X;X;X;Acetyl (K);X;X;X;X;X;X;X;X;X;X;X;X;X;X;X	XXXXXXXXXPPPPPPPPPPPPPPXXXXXXXX	IQALLDK(1)YNAEKPK	7	2	-1.4635		14014;14015;14016;14017	14016	19668	7782.8	0	0	8162.9	4711.7
P24270	430	P24270	P24270	sp|P24270|CATA_MOUSE Catalase OS=Mus musculus OX=10090 GN=Cat PE=1 SV=4	1	0.00430267	49.462	1	K	QRSALEHSVQCAVDVKRFNSANEDNVTQVRT	X;X;X;X;X;X;X;X;X;X;X;X;X;X;X;Acetyl (K);X;X;X;X;X;X;X;X;X;X;X;X;X;X;X	XXPPPPPPPPPPPPPPPXXXXXXXXXXXXXX	SALEHSVQCAVDVK(1)R	14	2	-2.7216		24379	24379	3769.7	0	0	0	0	0
P24472	195	P24472	P24472	sp|P24472|GSTA4_MOUSE Glutathione S-transferase A4 OS=Mus musculus OX=10090 GN=Gsta4 PE=1 SV=3	1	0.0188253	49.681	1	K	LLQAFKTRISNIPTIKKFLQPGSQRKPPPDG	X;X;X;X;X;X;X;X;X;X;X;X;X;X;X;Acetyl (K);X;X;X;X;X;X;X;X;X;X;X;X;X;X;X	XXXXXXXXPPPPPPPPPXXXXXXXXXXXXXX	ISNIPTIK(1)K	8	2	-1.4183		14185;14186;14187;14188	14188	38915	34411	32142	0	0	28434
P26040;P26041;P26043	262;262;262	P26040;P26041;P26043	P26041	sp|P26040|EZRI_MOUSE Ezrin OS=Mus musculus OX=10090 GN=Ezr PE=1 SV=3;sp|P26041|MOES_MOUSE Moesin OS=Mus musculus OX=10090 GN=Msn PE=1 SV=3;sp|P26043|RADI_MOUSE Radixin OS=Mus musculus OX=10090 GN=Rdx PE=1 SV=3	1	1.51978e-05	69.625	1	K	NISFNDKKFVIKPIDKKAPDFVFYAPRLRIN	X;X;X;X;X;X;X;X;X;X;X;X;X;X;X;Acetyl (K);X;X;X;X;X;X;X;X;X;X;X;X;X;X;X	XXXXXXXXPPPPPPPPPXXXXXXXXXXXXXX	FVIKPIDK(1)K	8	2	-1.8702		7205;7206;7207;7208;7209	7206	116380	95050	95184	0	51956	40417
P26040;P26041;P26043	254;254;254	P26040;P26041;P26043	P26041	sp|P26040|EZRI_MOUSE Ezrin OS=Mus musculus OX=10090 GN=Ezr PE=1 SV=3;sp|P26041|MOES_MOUSE Moesin OS=Mus musculus OX=10090 GN=Msn PE=1 SV=3;sp|P26043|RADI_MOUSE Radixin OS=Mus musculus OX=10090 GN=Rdx PE=1 SV=3	1	6.38661e-06	85.781	1	K	GFPWSEIRNISFNDKKFVIKPIDKKAPDFVF	X;X;X;X;X;X;X;X;X;X;X;X;X;X;X;Acetyl (K);X;X;X;X;X;X;X;Acetyl (K);X;X;X;X;X;X;X	XXXXXXXXXXXXXXXPPPPPPPPPXXXXXXX	K(1)FVIKPIDK	1	2	-1.1044		14939;14940;14941;14942;14943;14944	14942	61489	55993	59905	27665	38192	30539
P26041	151	P26041	P26041	sp|P26041|MOES_MOUSE Moesin OS=Mus musculus OX=10090 GN=Msn PE=1 SV=3	1	0.00283596	52.464	1	K	DFNKEVHKSGYLAGDKLLPQRVLEQHKLNKD	X;X;X;X;X;X;X;X;X;X;X;X;X;X;X;Acetyl (K);X;X;X;X;X;X;X;X;X;X;X;X;X;X;X	XXXXXXXXPPPPPPPPPPPPPXXXXXXXXXX	SGYLAGDK(1)LLPQR	8	2	-2.412		25551;25552;25553	25553	21850	23139	0	0	0	5698.2
P26043	60	P26043	P26043	sp|P26043|RADI_MOUSE Radixin OS=Mus musculus OX=10090 GN=Rdx PE=1 SV=3	1	0.016571	69.914	1	K	FGLQYVDSKGYSTWLKLNKKVTQQDVKKENP	X;X;X;X;X;X;X;X;X;X;X;X;X;X;X;Acetyl (K);X;X;X;X;X;X;X;X;X;X;X;X;X;X;X	XXXXXXXXXPPPPPPPPPPXXXXXXXXXXXX	GYSTWLK(1)LNK	7	2	-1.5834		9961;9962;9963	9963	71062	66513	83972	0	0	0
P26350	15	P26350	P26350	sp|P26350|PTMA_MOUSE Prothymosin alpha OS=Mus musculus OX=10090 GN=Ptma PE=1 SV=2	1	3.05103e-105	237.32	1	K	_MSDAAVDTSSEITTKDLKEKKEVVEEAENG	X;X;X;X;X;X;X;X;X;X;X;X;X;X;X;Acetyl (K);X;X;X;X;X;X;X;X;X;X;X;X;X;X;X	XXPPPPPPPPPPPPPPPPPXXXXXXXXXXXX	SDAAVDTSSEITTK(1)DLK	14	2	-1.9342		24631;24632;24633;24634;24635;24636	24636	519760	566070	886880	787330	650430	557670
P26350	103	P26350	P26350	sp|P26350|PTMA_MOUSE Prothymosin alpha OS=Mus musculus OX=10090 GN=Ptma PE=1 SV=2	1	4.49876e-16	141.71	1	K	GKRVAEDDEDDDVDTKKQKTEEDD_______	X;X;X;X;X;X;X;X;X;X;X;X;X;X;X;Acetyl (K);X;X;X;X;X;X;X;X;X;X;X;X;X;X;X	XXXPPPPPPPPPPPPPPXXXXXXXXXXXXXX	VAEDDEDDDVDTK(1)K	13	2	-3.1383		35188;35189;35190;35191;35192;35193	35193	30610	31943	32465	44068	27923	28547
P26443	187	P26443	P26443	sp|P26443|DHE3_MOUSE Glutamate dehydrogenase 1, mitochondrial OS=Mus musculus OX=10090 GN=Glud1 PE=1 SV=1	1	0.031604	59.59	1	K	CAVVDVPFGGAKAGVKINPKNYTDNELEKIT	X;X;X;X;X;X;X;X;X;X;X;X;X;X;X;Acetyl (K);X;X;X;Acetyl (K);X;X;X;X;X;X;X;X;Acetyl (K);X;X	XXXXXXXXXXXXPPPPPPPPXXXXXXXXXXX	AGVK(1)INPK	4	2	0.47862		1065;1066	1066	0	0	9727.5	0	19425	0
P26443	191	P26443	P26443	sp|P26443|DHE3_MOUSE Glutamate dehydrogenase 1, mitochondrial OS=Mus musculus OX=10090 GN=Glud1 PE=1 SV=1	1	0.000446435	74.047	1	K	DVPFGGAKAGVKINPKNYTDNELEKITRRFT	X;X;X;X;X;X;X;X;X;X;X;X;X;X;X;Acetyl (K);X;X;X;X;X;X;X;X;Acetyl (K);X;X;X;X;X;X	XXXXXXXXXXXXPPPPPPPPPPPPPXXXXXX	INPK(1)NYTDNELEK	4	2	3.689		13880;13881;13882;13883;13884	13884	34120	49117	43026	39368	47228	0
P26443	84	P26443	P26443	sp|P26443|DHE3_MOUSE Glutamate dehydrogenase 1, mitochondrial OS=Mus musculus OX=10090 GN=Glud1 PE=1 SV=1	1	1.38389e-31	164.32	1	K	MVEGFFDRGASIVEDKLVEDLKTRESEEQKR	X;X;X;X;X;X;X;X;X;X;X;X;X;X;X;Acetyl (K);X;X;X;X;X;Acetyl (K);X;X;X;X;X;X;X;X;X	XXXXXXXXPPPPPPPPPPPPPPXXXXXXXXX	GASIVEDK(1)LVEDLK	8	2	-2.4716		7523;7524;7525;7526;7527;7528	7528	759520	877190	1061500	931710	1000900	885200
P26443	90	P26443	P26443	sp|P26443|DHE3_MOUSE Glutamate dehydrogenase 1, mitochondrial OS=Mus musculus OX=10090 GN=Glud1 PE=1 SV=1	1	0.00288981	66.629	1	K	DRGASIVEDKLVEDLKTRESEEQKRNRVRGI	X;X;X;X;X;X;X;X;X;X;X;X;X;X;X;Acetyl (K);X;X;X;X;X;X;X;X;X;X;X;X;X;X;X	XXXXXXXXXXPPPPPPPPXXXXXXXXXXXXX	LVEDLK(1)TR	6	2	-0.57251		18952;18953;18954;18955;18956;18957	18957	302570	244300	272950	224190	236940	253710
P26443	415	P26443	P26443	sp|P26443|DHE3_MOUSE Glutamate dehydrogenase 1, mitochondrial OS=Mus musculus OX=10090 GN=Glud1 PE=1 SV=1	1	3.1138e-37	152.09	1	K	IIAEGANGPTTPEADKIFLERNIMVIPDLYL	X;X;X;X;X;X;X;X;X;X;X;X;X;X;X;Acetyl (K);X;X;X;X;X;X;X;X;X;X;X;X;X;X;X	PPPPPPPPPPPPPPPPPPPPPXXXXXXXXXX	IIAEGANGPTTPEADK(1)IFLER	16	2	-2.2198		13327;13328;13329;13330;13331;13332	13332	77716	116100	119700	89138	92511	85411
P26443	200	P26443	P26443	sp|P26443|DHE3_MOUSE Glutamate dehydrogenase 1, mitochondrial OS=Mus musculus OX=10090 GN=Glud1 PE=1 SV=1	1	0.000477431	86.161	1	K	GVKINPKNYTDNELEKITRRFTMELAKKGFI	X;X;Acetyl (K);X;X;X;X;X;X;X;X;X;X;X;X;Acetyl (K);X;X;X;X;X;X;X;X;X;X;X;X;X;X;X	XXXXXXXPPPPPPPPPPPPXXXXXXXXXXXX	NYTDNELEK(1)ITR	9	2	-1.0481		21873;21874	21874	0	9713.5	9582.8	0	0	0
P26443	503	P26443	P26443	sp|P26443|DHE3_MOUSE Glutamate dehydrogenase 1, mitochondrial OS=Mus musculus OX=10090 GN=Glud1 PE=1 SV=1	1	1.11665e-30	129.88	1	K	VPTAEFQDRISGASEKDIVHSGLAYTMERSA	X;X;X;X;X;X;X;X;X;X;X;X;X;X;X;Acetyl (K);X;X;X;X;X;X;X;X;X;X;X;X;X;X;X	XXXXXXXXXPPPPPPPPPPPPPPPPPPPPXX	ISGASEK(1)DIVHSGLAYTMER	7	2	-2.189		14156;14157;14158;14159;14160;14161;14162;14163;14164;14165;14166;14167	14167	150380	165380	264200	214790	268650	213860
P26443	390	P26443	P26443	sp|P26443|DHE3_MOUSE Glutamate dehydrogenase 1, mitochondrial OS=Mus musculus OX=10090 GN=Glud1 PE=1 SV=1	1	0.0328654	32.498	1	K	DCDILIPAASEKQLTKSNAPRVKAKIIAEGA	X;X;X;X;X;X;X;X;X;X;X;X;X;X;X;Acetyl (K);X;X;X;X;X;X;X;X;X;X;X;X;X;X;X	XXXXXXXXXXXXPPPPPPPPPXXXXXXXXXX	QLTK(1)SNAPR	4	2	-0.44005		23752	23752	0	0	0	0	0	81054
P26443	545	P26443	P26443	sp|P26443|DHE3_MOUSE Glutamate dehydrogenase 1, mitochondrial OS=Mus musculus OX=10090 GN=Glud1 PE=1 SV=1	1	3.7392e-10	142.14	1	K	LGLDLRTAAYVNAIEKVFKVYNEAGVTFT__	X;X;X;X;X;X;X;X;X;X;X;X;X;X;X;Acetyl (K);X;X;X;X;X;X;X;X;X;X;X;X;X;X;X	XXXXXXPPPPPPPPPPPPPXXXXXXXXXXXX	TAAYVNAIEK(1)VFK	10	2	-2.2737		27936;27937;27938;27939;27940;27941	27941	233580	284890	323160	220810	276240	252940
P26443	527	P26443	P26443	sp|P26443|DHE3_MOUSE Glutamate dehydrogenase 1, mitochondrial OS=Mus musculus OX=10090 GN=Glud1 PE=1 SV=1	1	1.0873e-09	117.2	1	K	YTMERSARQIMRTAMKYNLGLDLRTAAYVNA	X;X;X;X;X;X;X;X;X;X;X;X;X;X;Oxidation (M);Acetyl (K);X;X;X;X;X;X;X;X;X;X;X;X;X;X;X	XXXXXXXXXXXXPPPPPPPPPPPPXXXXXXX	TAMK(1)YNLGLDLR	4	2	-1.7185		28146;28147;28148;28149;28150;28151;28152;28153;28154;28155;28156;28157	28157	76185	101920	171900	61484	93669	88851
P27577	245	P27577	P27577	sp|P27577|ETS1_MOUSE Protein C-ets-1 OS=Mus musculus OX=10090 GN=Ets1 PE=1 SV=2	1	5.07705e-07	66.824	1	K	VLTPDNMCLGRASRGKLGGQDSFESVESYDS	X;X;X;X;X;X;X;X;X;X;X;X;X;X;X;Acetyl (K);X;X;X;X;X;X;X;X;X;X;X;X;X;X;X	XXXXXXXXXXXXXXPPPPPPPPPPPPPPPPP	GK(1)LGGQDSFESVESYDSCDR	2	2	-2.7709		8560;8561;8562;8563	8563	13141	19505	49276	25075	0	0
P27773	214	P27773	P27773	sp|P27773|PDIA3_MOUSE Protein disulfide-isomerase A3 OS=Mus musculus OX=10090 GN=Pdia3 PE=1 SV=2	1	0.000250071	91.407	1	K	NGEGITIFRPLHLANKFEDKTVAYTEKKMTS	X;X;X;X;X;X;X;X;X;X;X;X;X;X;X;Acetyl (K);X;X;X;X;X;X;X;X;X;X;X;X;X;X;X	XXXXXXXXXPPPPPPPPPPPXXXXXXXXXXX	PLHLANK(1)FEDK	7	2	-1.4257		22363;22364	22364	45547	22430	0	0	0	0
P28650	448	P28650	P28650	sp|P28650|PURA1_MOUSE Adenylosuccinate synthetase isozyme 1 OS=Mus musculus OX=10090 GN=Adss1 PE=1 SV=2	1	0.000141118	73.357	1	K	VENHMGVAVKWVGVGKSRESMIQLF______	X;X;X;X;X;X;X;X;X;X;X;X;X;X;X;Acetyl (K);X;X;X;X;X;X;X;X;X;X;X;X;X;X;X	XXXXXXXXXXPPPPPPPPXXXXXXXXXXXXX	WVGVGK(1)SR	6	2	-0.15114		38719;38720;38721;38722;38723;38724	38724	588800	807590	565770	457710	668850	729470
P29595	54	P29595	P29595	sp|P29595|NEDD8_MOUSE NEDD8 OS=Mus musculus OX=10090 GN=Nedd8 PE=1 SV=2	1	0.000647178	94.94	1	K	QQQRLIYSGKQMNDEKTAADYKILGGSVLHL	X;X;X;X;X;X;X;X;X;X;X;X;X;X;X;Acetyl (K);X;X;X;X;X;X;X;X;X;X;X;X;X;X;X	XXXXXXXXXXPPPPPPPPPPPPXXXXXXXXX	QMNDEK(1)TAADYK	6	2	-0.83477		23793;23794;23795	23795	24579	30854	0	0	5233	0
P29758	362	P29758	P29758	sp|P29758|OAT_MOUSE Ornithine aminotransferase, mitochondrial OS=Mus musculus OX=10090 GN=Oat PE=1 SV=1	1	9.16678e-06	90.965	1	K	ENADKMGAILRKELMKLPSDVVTSVRGKGLL	X;X;X;X;X;X;X;X;X;X;X;X;X;X;X;Acetyl (K);X;X;X;X;X;X;X;X;X;X;X;X;X;X;X	XXXXXXXXXXXXPPPPPPPPPPPPPPXXXXX	ELMK(1)LPSDVVTSVR	4	2	-2.144		5109;5110;5111;5112;5113;5114	5114	87341	64589	100640	44054	65497	55940
P30681;P63158	157;157	P30681;P63158	P63158	sp|P30681|HMGB2_MOUSE High mobility group protein B2 OS=Mus musculus OX=10090 GN=Hmgb2 PE=1 SV=3;sp|P63158|HMGB1_MOUSE High mobility group protein B1 OS=Mus musculus OX=10090 GN=Hmgb1 PE=1 SV=2	1	0.00476079	67.44	1	K	QPYEKKAAKLKEKYEKDIAAYRAKGKPDAAK;QPYEQKAAKLKEKYEKDIAAYRAKGKSEAGK	X;X;X;X;X;X;X;X;X;X;X;X;X;X;X;Acetyl (K);X;X;X;X;X;X;X;X;X;X;X;X;X;X;X	XXXXXXXXXXXXXPPPPPPPPPXXXXXXXXX	YEK(1)DIAAYR	3	2	1.9396		39048;39049;39050;39051;39052;39053	39053	62934	62379	51097	57394	58368	43734
P31786	55	P31786	P31786	sp|P31786|ACBP_MOUSE Acyl-CoA-binding protein OS=Mus musculus OX=10090 GN=Dbi PE=1 SV=2	1	0.00521044	78.983	1	K	VNTDRPGLLDLKGKAKWDSWNKLKGTSKESA	X;X;X;X;X;X;X;X;X;X;X;Acetyl (K);X;X;X;Acetyl (K);X;X;X;X;X;Acetyl (K);X;X;X;X;X;X;X;X;X	XXXXXXXXXXXXXXPPPPPPPPXXXXXXXXX	AK(1)WDSWNK	2	2	-0.30952		1440;1441;1442;1443;1444;1445	1445	1382200	1200300	995900	1010800	991030	823210
P31786	61	P31786	P31786	sp|P31786|ACBP_MOUSE Acyl-CoA-binding protein OS=Mus musculus OX=10090 GN=Dbi PE=1 SV=2	1	0.0203833	49.708	1	K	GLLDLKGKAKWDSWNKLKGTSKESAMKTYVE	X;X;X;X;X;Acetyl (K);X;X;X;X;X;X;X;X;X;Acetyl (K);X;X;X;X;X;X;X;X;X;X;X;X;X;X;X	XXXXXXXXXXPPPPPPPPXXXXXXXXXXXXX	WDSWNK(1)LK	6	2	1.5665		38312	38312	0	30688	0	0	0	0
P31786	51	P31786	P31786	sp|P31786|ACBP_MOUSE Acyl-CoA-binding protein OS=Mus musculus OX=10090 GN=Dbi PE=1 SV=2	1	1.5452e-30	202.77	1	K	TVGDVNTDRPGLLDLKGKAKWDSWNKLKGTS	X;X;X;X;X;X;X;X;X;X;X;X;X;X;X;Acetyl (K);X;X;X;Acetyl (K);X;X;X;X;X;Acetyl (K);X;X;X;X;X	PPPPPPPPPPPPPPPPPPXXXXXXXXXXXXX	QATVGDVNTDRPGLLDLK(1)GK	18	3	-0.10399		22184;22185;22186;23130;23131;23132;23133;23134;23135;23136;23137;23138;23139	23139	651280	554270	719100	488560	605780	550460
P31786	8	P31786	P31786	sp|P31786|ACBP_MOUSE Acyl-CoA-binding protein OS=Mus musculus OX=10090 GN=Dbi PE=1 SV=2	1	1.25756e-10	156.62	1	K	________MSQAEFDKAAEEVKRLKTQPTDE	X;X;X;X;X;X;X;X;X;X;X;X;X;X;X;Acetyl (K);X;X;X;X;X;X;X;X;X;X;X;X;X;X;X	XXXXXXXXXPPPPPPPPPPPPPPXXXXXXXX	SQAEFDK(1)AAEEVK	7	2	-1.3229		26704;26705;26706;26707;26708;26709;26710;26711;26712	26708	59429	0	39990	38205	34162	27300
P31786	77	P31786	P31786	sp|P31786|ACBP_MOUSE Acyl-CoA-binding protein OS=Mus musculus OX=10090 GN=Dbi PE=1 SV=2	1	0.000143617	102.43	1	K	LKGTSKESAMKTYVEKVDELKKKYGI_____	X;X;X;X;X;X;X;X;X;X;X;X;X;X;X;Acetyl (K);X;X;X;X;X;X;X;X;X;X;X;X;X;X;X	XXXXXXXXXXXPPPPPPPPPPPXXXXXXXXX	TYVEK(1)VDELK	5	2	3.9025		35075;35076;35077;35078;35079;35080;35081;35082;35083;35084;35085	35079	35146	20790	25694	30578	24212	22399
P32020	479	P32020	P32020	sp|P32020|SCP2_MOUSE Sterol carrier protein 2 OS=Mus musculus OX=10090 GN=Scp2 PE=1 SV=3	1	0.00833131	79.253	1	K	KDGPGGKEATWVVDVKNGKGSVLPNSDKKAD	X;X;X;X;X;X;X;X;X;X;X;X;X;X;X;Acetyl (K);X;X;X;X;X;X;X;X;X;X;X;Acetyl (K);X;X;X	XXXXXXXPPPPPPPPPPPPXXXXXXXXXXXX	EATWVVDVK(1)NGK	9	2	-3.7587		4412	4412	3444.1	0	0	0	0	0
P32020	491	P32020	P32020	sp|P32020|SCP2_MOUSE Sterol carrier protein 2 OS=Mus musculus OX=10090 GN=Scp2 PE=1 SV=3	1	0.00986958	50.785	1	K	VDVKNGKGSVLPNSDKKADCTITMADSDLLA	X;X;X;Acetyl (K);X;X;X;X;X;X;X;X;X;X;X;Acetyl (K);X;X;X;X;X;X;X;X;X;X;X;X;X;X;X	XXXXXXXPPPPPPPPPPXXXXXXXXXXXXXX	GSVLPNSDK(1)K	9	2	-4.1349		9349;9350;9351;9352	9352	150250	0	105370	0	100040	86538
P32020	453	P32020	P32020	sp|P32020|SCP2_MOUSE Sterol carrier protein 2 OS=Mus musculus OX=10090 GN=Scp2 PE=1 SV=3	1	1.12072e-06	135.33	1	K	KEIEKKLEEEGEQFVKKIGGIFAFKVKDGPG	X;X;X;X;X;X;X;X;X;X;X;X;X;X;X;Acetyl (K);X;X;X;X;X;X;X;X;X;X;X;X;X;X;X	XXXXXPPPPPPPPPPPPXXXXXXXXXXXXXX	LEEEGEQFVK(1)K	10	2	-1.9496		15110;15111;15112;15113;15114;15115;15858;15859;15860;15861;15862;15863	15863	57902	45074	36779	22012	25632	17972
P32020	544	P32020	P32020	sp|P32020|SCP2_MOUSE Sterol carrier protein 2 OS=Mus musculus OX=10090 GN=Scp2 PE=1 SV=3	1	4.74702e-05	120.97	1	K	MGLAMKLQNLQLQPGKAKL____________	X;X;X;X;X;X;X;X;X;X;X;X;X;X;X;Acetyl (K);X;X;X;X;X;X;X;X;X;X;X;X;X;X;X	XXXXXXPPPPPPPPPPPPXXXXXXXXXXXXX	LQNLQLQPGK(1)AK	10	2	-0.66977		18364;18365;18366	18366	15635	14225	0	0	5897.2	0
P34914	191	P34914	P34914	sp|P34914|HYES_MOUSE Bifunctional epoxide hydrolase 2 OS=Mus musculus OX=10090 GN=Ephx2 PE=1 SV=2	1	2.52519e-15	102.87	1	K	KPNEVVFLDDFGSNLKPARDMGMVTILVHNT	X;X;X;X;X;X;X;X;X;X;X;X;X;X;X;Acetyl (K);X;X;X;X;X;X;X;X;X;X;X;X;X;X;X	PPPPPPPPPPPPPPPPPPPXXXXXXXXXXXX	AKPNEVVFLDDFGSNLK(1)PAR	17	3	-2.0365		1412;1413;1414;1415;1416	1412	0	0	23519	6793.1	24019	16705
P34914	215	P34914	P34914	sp|P34914|HYES_MOUSE Bifunctional epoxide hydrolase 2 OS=Mus musculus OX=10090 GN=Ephx2 PE=1 SV=2	1	1.02499e-24	122.23	1	K	TILVHNTASALRELEKVTGTQFPEAPLPVPC	X;X;X;X;X;X;X;X;X;X;X;X;X;X;X;Acetyl (K);X;X;X;X;X;X;X;X;X;X;X;X;X;X;X	XXXXXXXXXXXXPPPPPPPPPPPPPPPPPPP	ELEK(1)VTGTQFPEAPLPVPCNPNDVSHGYVTVK	4	3	0.31715		5033;5034;5035;5036	5036	0	52956	67260	37615	30316	0
P34928	51	P34928	P34928	sp|P34928|APOC1_MOUSE Apolipoprotein C-I OS=Mus musculus OX=10090 GN=Apoc1 PE=1 SV=1	1	0.0202006	77.807	1	K	SIPDKLKEFGNTLEDKARAAIEHIKQKEILT	X;X;X;X;X;X;X;X;X;X;X;X;X;X;X;Acetyl (K);X;X;X;X;X;X;X;X;X;X;X;X;X;X;X	XXXXXXXPPPPPPPPPPPXXXXXXXXXXXXX	EFGNTLEDK(1)AR	9	2	-2.5455		4651	4651	0	0	114970	0	0	0
P35235	482	P35235	P35235	sp|P35235|PTN11_MOUSE Tyrosine-protein phosphatase non-receptor type 11 OS=Mus musculus OX=10090 GN=Ptpn11 PE=1 SV=3	1	3.98205e-06	129.64	1	K	GTFIVIDILIDIIREKGVDCDIDVPKTIQMV	X;X;X;X;X;X;X;X;X;X;X;X;X;X;X;Acetyl (K);X;X;X;X;X;X;X;X;X;X;X;X;X;X;X	XXXXXXXXXXXXXXPPPPPPPPPPPPXXXXX	EK(1)GVDCDIDVPK	2	2	2.4309		4935;4936;4937;4938;4939;4940;4941;4942;4943;4944	4944	32325	34056	40377	27010	27322	20042
P35235	198	P35235	P35235	sp|P35235|PTN11_MOUSE Tyrosine-protein phosphatase non-receptor type 11 OS=Mus musculus OX=10090 GN=Ptpn11 PE=1 SV=3	1	0.0191384	43.397	1	K	GGERFDSLTDLVEHYKKNPMVETLGTVLQLK	X;X;X;X;X;X;X;X;X;X;X;X;X;X;X;Acetyl (K);X;X;X;X;X;X;X;X;X;X;X;X;X;X;X	XXXXPPPPPPPPPPPPPXXXXXXXXXXXXXX	FDSLTDLVEHYK(1)K	12	2	-0.40077		5853	5853	0	0	4746.4	0	0	0
P35486	244	P35486	P35486	sp|P35486|ODPA_MOUSE Pyruvate dehydrogenase E1 component subunit alpha, somatic form, mitochondrial OS=Mus musculus OX=10090 GN=Pdha1 PE=1 SV=1	1	3.72813e-12	140.54	1	K	MGTSVERAAASTDYYKRGDFIPGLRVDGMDI	Oxidation (M);X;X;X;X;X;X;X;X;X;X;X;X;X;X;Acetyl (K);X;X;X;X;X;X;X;X;X;X;X;X;X;X;X	XXXXXXXPPPPPPPPPPXXXXXXXXXXXXXX	AAASTDYYK(1)R	9	2	-0.05803		33;34;35;36;37	37	1172800	1028600	1218200	751660	0	635940
P35486;P35487	83;84	P35486	P35486	sp|P35486|ODPA_MOUSE Pyruvate dehydrogenase E1 component subunit alpha, somatic form, mitochondrial OS=Mus musculus OX=10090 GN=Pdha1 PE=1 SV=1;sp|P35487|ODPAT_MOUSE Pyruvate dehydrogenase E1 component subunit alpha, testis-specific form, mitochondrial OS=	1	2.33914e-05	110.54	1;2	K	MQTVRRMELKADQLYKQKIIRGFCHLCDGQE	X;X;X;X;X;X;X;X;X;Acetyl (K);X;X;X;X;X;Acetyl (K);X;Acetyl (K);X;X;X;X;X;X;X;X;X;X;X;X;X	XXXXXXPPPPPPPPPPPPPPPXXXXXXXXXX	MELK(1)ADQLYK(1)QK	10	2	1.1083		515;516;517;518;519;520;521;522;523;524;525;526;19653;19654;19655;19656;19657;19658	19658	2049600	2134300	2541400	2005900	522730	19376
P35486;P35487	85;86	P35486	P35486	sp|P35486|ODPA_MOUSE Pyruvate dehydrogenase E1 component subunit alpha, somatic form, mitochondrial OS=Mus musculus OX=10090 GN=Pdha1 PE=1 SV=1;sp|P35487|ODPAT_MOUSE Pyruvate dehydrogenase E1 component subunit alpha, testis-specific form, mitochondrial OS=	1	0.000157072	110.54	2	K	TVRRMELKADQLYKQKIIRGFCHLCDGQEAC	X;X;X;X;X;X;X;Acetyl (K);X;X;X;X;X;Acetyl (K);X;Acetyl (K);X;X;X;X;X;X;X;X;X;X;X;X;X;X;X	XXXXXXXXPPPPPPPPPPPXXXXXXXXXXXX	ADQLYK(1)QK(1)IIR	8	2	-1.1668		522;523;524;525;526	526	0	28349	25762	18692	23429	14414
P35486	63	P35486	P35486	sp|P35486|ODPA_MOUSE Pyruvate dehydrogenase E1 component subunit alpha, somatic form, mitochondrial OS=Mus musculus OX=10090 GN=Pdha1 PE=1 SV=1	1	5.08777e-05	93.699	1	K	EGPPVTTVLTREDGLKYYRMMQTVRRMELKA	X;X;X;X;X;X;X;X;X;X;X;X;X;X;X;Acetyl (K);X;X;X;X;X;X;X;X;X;X;X;X;X;Acetyl (K);X	XXXXXXXXXXXPPPPPPPPXXXXXXXXXXXX	EDGLK(1)YYR	5	2	-0.88821		4466;4467;4468;4469;4470;4471	4471	563340	515640	532900	385940	488200	449030
P35486	385	P35486	P35486	sp|P35486|ODPA_MOUSE Pyruvate dehydrogenase E1 component subunit alpha, somatic form, mitochondrial OS=Mus musculus OX=10090 GN=Pdha1 PE=1 SV=1	1	0.0336974	43.176	1	K	SSDPPFEVRGANQWIKFKSVS__________	X;X;X;X;X;X;X;X;X;X;X;X;X;X;X;Acetyl (K);X;X;X;X;X;X;X;X;X;X;X;X;X;X;X	XXXXXXXXXPPPPPPPPPXXXXXXXXXXXXX	GANQWIK(1)FK	7	2	-3.3459		7497	7497	0	0	0	29996	0	0
P35486;P35487	77;78	P35486	P35486	sp|P35486|ODPA_MOUSE Pyruvate dehydrogenase E1 component subunit alpha, somatic form, mitochondrial OS=Mus musculus OX=10090 GN=Pdha1 PE=1 SV=1;sp|P35487|ODPAT_MOUSE Pyruvate dehydrogenase E1 component subunit alpha, testis-specific form, mitochondrial OS=	1	3.59033e-06	135.13	1;2	K	LKYYRMMQTVRRMELKADQLYKQKIIRGFCH	X;Acetyl (K);X;X;X;X;X;X;X;X;X;X;X;X;X;Acetyl (K);X;X;X;X;X;Acetyl (K);X;Acetyl (K);X;X;X;X;X;X;X	XXXXXXXXXXXPPPPPPPPPPPPPXXXXXXX	RMELK(1)ADQLYK	5	2	-0.19786		19642;19643;19644;19645;19646;19647;19648;19649;19650;19651;19652;19653;19654;19655;19656;19657;19658;24220;24221	24221	1018500	1501500	1402400	1434700	1423900	1395600
P35486	39	P35486	P35486	sp|P35486|ODPA_MOUSE Pyruvate dehydrogenase E1 component subunit alpha, somatic form, mitochondrial OS=Mus musculus OX=10090 GN=Pdha1 PE=1 SV=1	1	0.024749	78.991	1	K	LVASRNFANDATFEIKKCDLHRLEEGPPVTT	X;X;X;X;X;X;X;X;X;X;X;X;X;X;X;Acetyl (K);X;X;X;X;X;X;X;X;X;X;X;X;X;X;X	XXXXXPPPPPPPPPPPPXXXXXXXXXXXXXX	NFANDATFEIK(1)K	11	2	-2.4312		20852	20852	112350	0	0	0	0	0
P35486	321	P35486	P35486	sp|P35486|ODPA_MOUSE Pyruvate dehydrogenase E1 component subunit alpha, somatic form, mitochondrial OS=Mus musculus OX=10090 GN=Pdha1 PE=1 SV=1	1	1.46792e-12	117.24	1;2	K	EIQEVRSKSDPIMLLKDRMVNSNLASVEELK	X;X;X;X;X;X;X;Acetyl (K);X;X;X;X;Oxidation (M);X;X;Acetyl (K);X;X;X;X;X;X;X;X;X;X;X;X;X;X;X	XXXXXXPPPPPPPPPPPPXXXXXXXXXXXXX	SK(1)SDPIMLLK(1)DR	10	2	-1.4069		24736;24737;24738;24739;24740;24741;24742;24743;24744;24745;24746;24747;24748;25874;25875;25876	25876	9985400	9617000	10616000	9820200	10018000	9358500
P35486	313	P35486	P35486	sp|P35486|ODPA_MOUSE Pyruvate dehydrogenase E1 component subunit alpha, somatic form, mitochondrial OS=Mus musculus OX=10090 GN=Pdha1 PE=1 SV=1	1	1.94524e-05	13.511	1;2	K	GVSYRTREEIQEVRSKSDPIMLLKDRMVNSN	X;X;X;X;X;X;X;X;X;X;X;X;X;X;X;Acetyl (K);X;X;X;X;Oxidation (M);X;X;Acetyl (K);X;X;X;X;X;X;X	XXXXXXXXXXXXXXPPPPPPPPPPPPXXXXX	SK(1)SDPIMLLK(1)DR	2	2	-1.4069		25873;25874;25875;25876	25876	347790	0	416660	0	348610	0
P35700	27	P35700	P35700	sp|P35700|PRDX1_MOUSE Peroxiredoxin-1 OS=Mus musculus OX=10090 GN=Prdx1 PE=1 SV=1	1	1.13582e-09	107.41	1	K	APNFKATAVMPDGQFKDISLSEYKGKYVVFF	X;X;X;X;X;X;X;X;X;X;X;X;X;X;X;Acetyl (K);X;X;X;X;X;X;X;X;X;X;X;X;X;X;X	XXXXXPPPPPPPPPPPPPPPPPPPXXXXXXX	ATAVMPDGQFK(1)DISLSEYK	11	2	-1.2512		2470;2471;2472;2473;2474	2474	29099	37223	42637	18558	25596	0
P35700	136	P35700	P35700	sp|P35700|PRDX1_MOUSE Peroxiredoxin-1 OS=Mus musculus OX=10090 GN=Prdx1 PE=1 SV=1	1	0.0116247	34.881	1	K	ADEGISFRGLFIIDDKGILRQITINDLPVGR	X;X;X;X;X;X;X;X;X;X;X;X;X;X;X;Acetyl (K);X;X;X;X;X;X;X;X;X;X;X;X;X;X;X	XXXXXXXXPPPPPPPPPPPPXXXXXXXXXXX	GLFIIDDK(1)GILR	8	2	-2.3661		8666;8667;8668	8668	0	4266.1	8535.3	0	4829.1	0
P38060	48	P38060	P38060	sp|P38060|HMGCL_MOUSE Hydroxymethylglutaryl-CoA lyase, mitochondrial OS=Mus musculus OX=10090 GN=Hmgcl PE=1 SV=2	1	4.30467e-54	244.63	1	K	VKIVEVGPRDGLQNEKSIVPTPVKIRLIDML	X;X;X;X;X;X;X;X;X;X;X;X;X;X;X;Acetyl (K);X;X;X;X;X;X;X;X;X;X;X;X;X;X;X	XXXXXXXXXPPPPPPPPPPPPPPPXXXXXXX	DGLQNEK(1)SIVPTPVK	7	2	-0.68827		3608;3609;3610;3611;3612;3613;3614;3615;3616	3616	2910800	2713900	2396400	2066900	2744700	2835000
P38647	360	P38647	P38647	sp|P38647|GRP75_MOUSE Stress-70 protein, mitochondrial OS=Mus musculus OX=10090 GN=Hspa9 PE=1 SV=3	1	4.07984e-41	209.42	1	K	KLTRAQFEGIVTDLIKRTIAPCQKAMQDAEV	Acetyl (K);X;X;X;X;X;X;X;X;X;X;X;X;X;X;Acetyl (K);X;X;X;X;X;X;X;X;X;X;X;X;X;X;X	XXXXPPPPPPPPPPPPPXXXXXXXXXXXXXX	AQFEGIVTDLIK(1)R	12	2	-0.27192		2136;2137;2138;2139;2140;2141	2141	1355200	1673100	1982400	1483300	1628800	1729100
P38647	610	P38647	P38647	sp|P38647|GRP75_MOUSE Stress-70 protein, mitochondrial OS=Mus musculus OX=10090 GN=Hspa9 PE=1 SV=3	1	0.00241626	61.019	1	K	KMEEFKDQLPADECNKLKEEISKMRALLAGK	X;X;X;X;X;X;X;X;X;X;X;X;X;X;X;Acetyl (K);X;X;X;X;X;X;Acetyl (K);X;X;X;X;X;X;X;X	XXXXXXPPPPPPPPPPPPXXXXXXXXXXXXX	DQLPADECNK(1)LK	10	2	-0.62576		4040;4041;4042;4043;4044	4044	54903	44014	81938	0	53555	54505
P38647	300	P38647	P38647	sp|P38647|GRP75_MOUSE Stress-70 protein, mitochondrial OS=Mus musculus OX=10090 GN=Hspa9 PE=1 SV=3	1	0.00125666	72.117	1	K	HIVKEFKRETGVDLTKDNMALQRVREAAEKA	X;X;X;Acetyl (K);X;X;Acetyl (K);X;X;X;X;X;X;X;X;Acetyl (K);X;X;X;X;X;X;X;X;X;X;X;X;X;X;X	XXXXXXXXPPPPPPPPPPPPPPPXXXXXXXX	ETGVDLTK(1)DNMALQR	8	2	-0.076318		5394;5395	5395	1934.9	0	6907.3	0	0	0
P38647	288	P38647	P38647	sp|P38647|GRP75_MOUSE Stress-70 protein, mitochondrial OS=Mus musculus OX=10090 GN=Hspa9 PE=1 SV=3	1	0.00100542	98.601	1;2	K	LGGEDFDQALLRHIVKEFKRETGVDLTKDNM	X;X;X;X;X;X;X;X;X;X;X;X;X;X;X;Acetyl (K);X;X;Acetyl (K);X;X;X;X;X;X;X;X;Acetyl (K);X;X;X	XXXXXXXXXXXXPPPPPPPPXXXXXXXXXXX	HIVK(1)EFK(1)R	4	2	-0.98855		10937;10938;10939;10940;10941;10942;10943	10943	1554700	1650800	1605600	1450000	1419600	1586200
P38647	291	P38647	P38647	sp|P38647|GRP75_MOUSE Stress-70 protein, mitochondrial OS=Mus musculus OX=10090 GN=Hspa9 PE=1 SV=3	1	0.0253578	37.11	2	K	EDFDQALLRHIVKEFKRETGVDLTKDNMALQ	X;X;X;X;X;X;X;X;X;X;X;X;Acetyl (K);X;X;Acetyl (K);X;X;X;X;X;X;X;X;Acetyl (K);X;X;X;X;X;X	XXXXXXXXXPPPPPPPPXXXXXXXXXXXXXX	HIVK(1)EFK(1)R	7	2	-0.98855		10943	10943	16518	0	0	0	0	0
P38647	345	P38647	P38647	sp|P38647|GRP75_MOUSE Stress-70 protein, mitochondrial OS=Mus musculus OX=10090 GN=Hspa9 PE=1 SV=3	1	8.25136e-07	105.72	1	K	PYLTMDASGPKHLNMKLTRAQFEGIVTDLIK	X;X;X;X;X;X;X;X;X;X;X;X;X;X;X;Acetyl (K);X;X;X;X;X;X;X;X;X;X;X;X;X;X;Acetyl (K)	XXXXXXXXXXXPPPPPPPPXXXXXXXXXXXX	HLNMK(1)LTR	5	2	-0.1305		11227;11228;11229;11230;11231;11232	11232	425640	346910	381340	227460	378490	416580
P38647	617	P38647	P38647	sp|P38647|GRP75_MOUSE Stress-70 protein, mitochondrial OS=Mus musculus OX=10090 GN=Hspa9 PE=1 SV=3	1	0.00993315	54.705	1	K	QLPADECNKLKEEISKMRALLAGKDSETGEN	X;X;X;X;X;X;X;X;Acetyl (K);X;X;X;X;X;X;Acetyl (K);X;X;X;X;X;X;X;X;X;X;X;X;X;X;X	XXXXXXXXXPPPPPPPPPXXXXXXXXXXXXX	LKEEISK(1)MR	7	2	0.20335		17220;17221;17222;17223	17220	38276	0	26711	0	28153	25564
P38647	600	P38647	P38647	sp|P38647|GRP75_MOUSE Stress-70 protein, mitochondrial OS=Mus musculus OX=10090 GN=Hspa9 PE=1 SV=3	1	4.22139e-42	249.65	1	K	AEGIIHDTETKMEEFKDQLPADECNKLKEEI	X;X;X;X;X;X;X;X;X;X;X;Oxidation (M);X;X;X;Acetyl (K);X;X;X;X;X;X;X;X;X;Acetyl (K);X;X;X;X;X	XXXXXXXXXXXPPPPPPPPPPPPPPPXXXXX	MEEFK(1)DQLPADECNK	5	2	-1.4759		19615;19616;19617;19618;19619;19620;19622	19622	542860	482080	791900	493680	525410	536170
P38647	567	P38647	P38647	sp|P38647|GRP75_MOUSE Stress-70 protein, mitochondrial OS=Mus musculus OX=10090 GN=Hspa9 PE=1 SV=3	1	5.2631e-06	91.343	1	K	GLSKDDIENMVKNAEKYAEEDRRKKERVEAV	X;X;X;X;X;X;X;X;X;X;X;X;X;X;X;Acetyl (K);X;X;X;X;X;X;X;X;X;X;X;X;X;X;X	XXXXXXXXXXXXPPPPPPPPPPPXXXXXXXX	NAEK(1)YAEEDRR	4	2	-1.7512		20671;20672;20673;20674;20675;20676;20677;20678	20678	41809	21513	18111	10598	24462	17587
P38647	121	P38647	P38647	sp|P38647|GRP75_MOUSE Stress-70 protein, mitochondrial OS=Mus musculus OX=10090 GN=Hspa9 PE=1 SV=3	1	1.50793e-08	142.89	1	K	KRQAVTNPNNTFYATKRLIGRRYDDPEVQKD	X;X;X;X;X;X;X;X;X;X;X;X;X;X;X;Acetyl (K);X;X;X;X;X;X;X;X;X;X;X;X;X;Acetyl (K);X	XXPPPPPPPPPPPPPPPXXXXXXXXXXXXXX	QAVTNPNNTFYATK(1)R	14	2	-1.3507		23147;23148;23149;23150;23151;23152	23152	30568	19771	13007	5105.5	11243	7131.1
P38647	135	P38647	P38647	sp|P38647|GRP75_MOUSE Stress-70 protein, mitochondrial OS=Mus musculus OX=10090 GN=Hspa9 PE=1 SV=3	1	1.33185e-22	209.8	1	K	TKRLIGRRYDDPEVQKDTKNVPFKIVRASNG	X;Acetyl (K);X;X;X;X;X;X;X;X;X;X;X;X;X;Acetyl (K);X;X;X;X;X;X;X;X;X;X;X;X;X;X;X	XXXXXXXPPPPPPPPPPPPXXXXXXXXXXXX	YDDPEVQK(1)DTK	8	2	-0.32117		24250;24251;24252;24253;24254;24255;38890;38891;38892;38893;38894	38894	236080	227050	259930	177700	175020	280940
P38647	234	P38647	P38647	sp|P38647|GRP75_MOUSE Stress-70 protein, mitochondrial OS=Mus musculus OX=10090 GN=Hspa9 PE=1 SV=3	1	2.72434e-25	131.13	1	K	VINEPTAAALAYGLDKSEDKVIAVYDLGGGT	X;X;X;X;X;X;X;X;X;X;X;X;X;X;X;Acetyl (K);X;X;X;X;X;X;X;X;X;X;X;X;X;X;X	PPPPPPPPPPPPPPPPPPPPXXXXXXXXXXX	VINEPTAAALAYGLDK(1)SEDK	16	2	-2.7441		36559;36560;36561;36562;36563;36564	36564	25150	42187	64330	9445.2	24226	20530
P39054	299	P39054	P39054	sp|P39054|DYN2_MOUSE Dynamin-2 OS=Mus musculus OX=10090 GN=Dnm2 PE=1 SV=2	1	0.000336451	88.473	1	K	QLTNHIRESLPTLRSKLQSQLLSLEKEVEEY	X;X;X;X;X;X;X;X;X;X;X;X;X;X;X;Acetyl (K);X;X;X;X;X;X;X;X;X;X;X;X;X;X;X	XXXXXXXXXXXXXXPPPPPPPPPPPPXXXXX	SK(1)LQSQLLSLEK	2	2	-2.0899		25861;25862;25863;25864	25864	7656.1	0	0	5031.5	6914.4	5445
P40124	80	P40124	P40124	sp|P40124|CAP1_MOUSE Adenylyl cyclase-associated protein 1 OS=Mus musculus OX=10090 GN=Cap1 PE=1 SV=4	1	0.00525422	49.446	1	K	GGDVQKHAEMVHTGLKLERALLATASQCQQP	X;X;X;X;X;X;X;X;X;X;X;X;X;X;X;Acetyl (K);X;X;X;X;X;X;X;X;X;X;X;X;X;X;X	XXXXXXPPPPPPPPPPPPPXXXXXXXXXXXX	HAEMVHTGLK(1)LER	10	2	-0.69779		10006	10006	6071.8	0	0	0	0	0
P40124	375	P40124	P40124	sp|P40124|CAP1_MOUSE Adenylyl cyclase-associated protein 1 OS=Mus musculus OX=10090 GN=Cap1 PE=1 SV=4	1	0.00644186	57.657	1	K	LQIKGKINSITVDNCKKLGLVFDDVVGIVEI	X;X;X;X;X;X;X;X;X;X;X;X;X;X;X;Acetyl (K);X;X;X;X;X;X;X;X;X;X;X;X;X;X;X	XXXXXXPPPPPPPPPPPXXXXXXXXXXXXXX	INSITVDNCK(1)K	10	2	0.18402		13896	13896	11153	0	0	0	0	0
P40142	232	P40142	P40142	sp|P40142|TKT_MOUSE Transketolase OS=Mus musculus OX=10090 GN=Tkt PE=1 SV=1	1	1.53762e-08	160.07	1	K	DGHSVEELCKAFGQAKHQPTAIIAKTFKGRG	X;X;X;X;X;X;X;X;X;X;X;X;X;X;X;Acetyl (K);X;X;X;X;X;X;X;X;X;X;X;X;X;X;X	XXXXXXXXXXPPPPPPPPPPPPPPPXXXXXX	AFGQAK(1)HQPTAIIAK	6	2	-0.66081		766	766	0	0	0	15005	0	0
P40936	219	P40936	P40936	sp|P40936|INMT_MOUSE Indolethylamine N-methyltransferase OS=Mus musculus OX=10090 GN=Inmt PE=1 SV=1	1	0.000349091	97.407	1	K	HYMVGPKKFSGVYLEKEVVEKAIQDAGCQVL	X;X;X;X;X;X;X;X;X;X;X;X;X;X;X;Acetyl (K);X;X;X;X;X;X;X;X;X;X;X;X;X;X;X	XXXXXXXXPPPPPPPPPPPPPXXXXXXXXXX	FSGVYLEK(1)EVVEK	8	2	-2.2463		6993	6993	0	0	89236	0	0	0
P41216	203	P41216	P41216	sp|P41216|ACSL1_MOUSE Long-chain-fatty-acid--CoA ligase 1 OS=Mus musculus OX=10090 GN=Acsl1 PE=1 SV=2	1	0.000221937	108.81	1	K	TYIVNKAELSVIFADKPEKAKLLLEGVENKL	X;X;X;X;X;X;X;X;X;X;X;X;X;X;X;Acetyl (K);X;X;X;X;Acetyl (K);X;X;X;X;X;X;X;X;X;X	XXXXXXPPPPPPPPPPPPPXXXXXXXXXXXX	AELSVIFADK(1)PEK	10	2	-1.2069		602;603;604	604	147770	0	253960	135890	0	0
P41216	206	P41216	P41216	sp|P41216|ACSL1_MOUSE Long-chain-fatty-acid--CoA ligase 1 OS=Mus musculus OX=10090 GN=Acsl1 PE=1 SV=2	0.998371	5.46056e-08	128.47	1	K	VNKAELSVIFADKPEKAKLLLEGVENKLTPC	X;X;X;X;X;X;X;X;X;X;X;X;X;X;X;Acetyl (K);X;Acetyl (K);X;X;X;X;X;X;X;X;X;X;X;X;X	XXXPPPPPPPPPPPPPPPXXXXXXXXXXXXX	AELSVIFADK(0.002)PEK(0.998)AK	13	2	-1.4311		605;606;607;608;609;610	608	312080	295640	347820	295550	302310	275040
P41216	208	P41216	P41216	sp|P41216|ACSL1_MOUSE Long-chain-fatty-acid--CoA ligase 1 OS=Mus musculus OX=10090 GN=Acsl1 PE=1 SV=2	1	3.46006e-05	99.791	1	K	KAELSVIFADKPEKAKLLLEGVENKLTPCLK	X;X;X;X;X;X;X;X;X;X;Acetyl (K);X;X;X;X;Acetyl (K);X;X;X;X;X;X;X;X;X;X;X;X;X;X;X	XXXXXXXXXXXXXXPPPPPPPPPPPXXXXXX	AK(1)LLLEGVENK	2	2	-1.3271		1400;1401;1402;1403;1404;1405	1405	122900	125650	104390	91847	97885	74805
P41216	641	P41216	P41216	sp|P41216|ACSL1_MOUSE Long-chain-fatty-acid--CoA ligase 1 OS=Mus musculus OX=10090 GN=Acsl1 PE=1 SV=2	1	0.00161546	61.462	1	K	CRNKDINKAILDDLLKLGKEAGLKPFEQVKG	X;X;X;X;X;X;X;X;X;X;X;X;X;X;X;Acetyl (K);X;X;X;X;X;X;X;Acetyl (K);X;X;X;X;X;X;X	XXXXXXXXPPPPPPPPPPPXXXXXXXXXXXX	AILDDLLK(1)LGK	8	2	2.1953		1293	1293	0	0	0	0	27729	0
P41216	649	P41216	P41216	sp|P41216|ACSL1_MOUSE Long-chain-fatty-acid--CoA ligase 1 OS=Mus musculus OX=10090 GN=Acsl1 PE=1 SV=2	1	0.0181536	42.514	1	K	AILDDLLKLGKEAGLKPFEQVKGIAVHPELF	X;X;X;X;X;X;X;Acetyl (K);X;X;X;X;X;X;X;Acetyl (K);X;X;X;X;X;X;X;X;X;X;X;X;X;X;X	XXXXXXXXXXXPPPPPPPPPPPXXXXXXXXX	EAGLK(1)PFEQVK	5	2	-1.4569		4330	4330	0	0	0	0	91173	0
P41216	562	P41216	P41216	sp|P41216|ACSL1_MOUSE Long-chain-fatty-acid--CoA ligase 1 OS=Mus musculus OX=10090 GN=Acsl1 PE=1 SV=2	1	3.60101e-07	111.42	1	K	PNGTLKIIDRKKHIFKLAQGEYIAPEKIENI	X;X;X;X;X;Acetyl (K);X;X;X;X;X;X;X;X;X;Acetyl (K);X;X;X;X;X;X;X;X;X;X;Acetyl (K);X;X;X;X	XXXXXXXXXXXXPPPPPPPPPPPPPPPXXXX	HIFK(1)LAQGEYIAPEK	4	2	-3.8396		10816;10817;10818;10819;10820	10820	273270	214870	106670	0	78819	31060
P41216	573	P41216	P41216	sp|P41216|ACSL1_MOUSE Long-chain-fatty-acid--CoA ligase 1 OS=Mus musculus OX=10090 GN=Acsl1 PE=1 SV=2	1	0.000617554	70.314	1	K	KHIFKLAQGEYIAPEKIENIYLRSEAVAQVF	X;X;X;X;X;X;X;X;X;X;X;X;X;X;X;Acetyl (K);X;X;X;X;X;X;X;X;X;X;X;X;X;X;X	XXXXXPPPPPPPPPPPPPPPPPPXXXXXXXX	LAQGEYIAPEK(1)IENIYLR	11	2	-0.55606		15477;15478;15479;15480	15480	11998	21253	20278	0	9532.8	0
P41216	420	P41216	P41216	sp|P41216|ACSL1_MOUSE Long-chain-fatty-acid--CoA ligase 1 OS=Mus musculus OX=10090 GN=Acsl1 PE=1 SV=2	1	0.000310579	64.11	1	K	GIVRNNSLWDKLIFHKIQSSLGGKVRLMITG	X;X;X;X;X;X;X;X;X;X;X;X;X;X;X;Acetyl (K);X;X;X;X;X;X;X;X;X;X;X;Oxidation (M);X;X;X	XXXXXXXXXXXPPPPPPPPPPPPPXXXXXXX	LIFHK(1)IQSSLGGK	5	2	1.4019		16807;16808;16809;16810;16811;16812	16812	118460	86989	102020	50156	147880	78144
P41216	415	P41216	P41216	sp|P41216|ACSL1_MOUSE Long-chain-fatty-acid--CoA ligase 1 OS=Mus musculus OX=10090 GN=Acsl1 PE=1 SV=2	1	8.70378e-07	176.26	1	K	AELRSGIVRNNSLWDKLIFHKIQSSLGGKVR	X;X;X;X;X;X;X;X;X;X;X;X;X;X;X;Acetyl (K);X;X;X;X;Acetyl (K);X;X;X;X;X;X;X;X;X;X	XXXXXXXXXPPPPPPPPPPPPXXXXXXXXXX	NNSLWDK(1)LIFHK	7	2	-0.93079		21423;21424;21425;21426;21427;21428	21428	62564	46567	85513	14975	91950	22254
P41216	533	P41216	P41216	sp|P41216|ACSL1_MOUSE Long-chain-fatty-acid--CoA ligase 1 OS=Mus musculus OX=10090 GN=Acsl1 PE=1 SV=2	1	5.20612e-19	120.33	1	K	KGYLKDPARTAEALDKDGWLHTGDIGKWLPN	X;X;X;X;X;X;X;X;X;X;X;X;X;X;X;Acetyl (K);X;X;X;X;X;X;X;X;X;X;X;X;X;X;X	XXXXXXXXXPPPPPPPPPPPPPPPPPPXXXX	TAEALDK(1)DGWLHTGDIGK	7	2	0.63435		27964;27965;27966;27967	27967	73298	64420	45532	0	27493	0
P41216	396	P41216	P41216	sp|P41216|ACSL1_MOUSE Long-chain-fatty-acid--CoA ligase 1 OS=Mus musculus OX=10090 GN=Acsl1 PE=1 SV=2	1	0.0164542	44.127	1	K	QANTSLKRWLLDFASKRKEAELRSGIVRNNS	X;X;X;X;X;X;X;X;X;X;X;X;X;X;X;Acetyl (K);X;X;X;X;X;X;X;X;X;X;X;X;X;X;X	XXXXXXXXPPPPPPPPPXXXXXXXXXXXXXX	WLLDFASK(1)R	8	2	0.47658		38522;38523;38524;38525	38525	0	28193	18593	4889.3	24417	0
P41216	552	P41216	P41216	sp|P41216|ACSL1_MOUSE Long-chain-fatty-acid--CoA ligase 1 OS=Mus musculus OX=10090 GN=Acsl1 PE=1 SV=2	1	0.00519521	49.81	1	K	LHTGDIGKWLPNGTLKIIDRKKHIFKLAQGE	X;X;X;X;X;X;X;X;X;X;X;X;X;X;X;Acetyl (K);X;X;X;X;X;X;X;X;X;Acetyl (K);X;X;X;X;X	XXXXXXXXPPPPPPPPPPPPXXXXXXXXXXX	WLPNGTLK(1)IIDR	8	2	-0.23163		38558;38559;38560	38560	31103	41919	36020	0	0	0
P42125	255	P42125	P42125	sp|P42125|ECI1_MOUSE Enoyl-CoA delta isomerase 1, mitochondrial OS=Mus musculus OX=10090 GN=Eci1 PE=1 SV=2	1	2.89446e-13	158	1	K	LTKNMMRKATADNLIKQREADIQNFTSFISK	X;X;X;X;X;X;X;X;X;X;X;X;X;X;X;Acetyl (K);X;X;X;X;X;X;X;X;X;X;X;X;X;X;X	XXXXXXXPPPPPPPPPPPXXXXXXXXXXXXX	ATADNLIK(1)QR	8	2	1.0364		2447;2448;2449;2450;2451;2452;14779	2452	710810	526110	594480	534700	593430	688070
P42125	76	P42125	P42125	sp|P42125|ECI1_MOUSE Enoyl-CoA delta isomerase 1, mitochondrial OS=Mus musculus OX=10090 GN=Eci1 PE=1 SV=2	1	0.000159415	47.175	1	K	CLTEFTISLEKLENDKSIRGVILTSECPGIF	X;X;X;X;X;X;X;X;X;X;X;X;X;X;X;Acetyl (K);X;X;X;X;X;X;X;X;X;X;X;X;X;X;X	XXXXXXXXXXXPPPPPPPPXXXXXXXXXXXX	LENDK(1)SIR	5	2	-1.4324		15973;15974;15975;15976;15977;15978	15978	4707600	4037400	4125200	3869800	3893400	4317400
P42125	283	P42125	P42125	sp|P42125|ECI1_MOUSE Enoyl-CoA delta isomerase 1, mitochondrial OS=Mus musculus OX=10090 GN=Eci1 PE=1 SV=2	1	0.000406489	82.472	1	K	ISKDSIQKSLHMYLEKLKQKKG_________	X;X;X;X;X;X;X;X;X;X;X;Oxidation (M);X;X;X;Acetyl (K);X;X;X;X;X;X;X;X;X;X;X;X;X;X;X	XXXXXXXXPPPPPPPPPPXXXXXXXXXXXXX	SLHMYLEK(1)LK	8	2	-0.95002		26100;26101;26102;26103;26104;26105	26105	159520	106840	92595	35305	103870	62193
P42125	229	P42125	P42125	sp|P42125|ECI1_MOUSE Enoyl-CoA delta isomerase 1, mitochondrial OS=Mus musculus OX=10090 GN=Eci1 PE=1 SV=2	1	7.71003e-23	159.4	1	K	VPEDQVHSKARSVMTKWLAIPDHSRQLTKNM	X;X;X;X;X;X;X;X;Acetyl (K);X;X;X;X;Oxidation (M);X;Acetyl (K);X;X;X;X;X;X;X;X;X;X;X;X;X;X;X	XXXXXXXXXXXPPPPPPPPPPPPPPXXXXXX	SVMTK(1)WLAIPDHSR	5	2	-2.2448		27503;27504;27505;27506;27507;27508;27509	27509	359570	300850	570380	104420	300110	306610
P42125	222	P42125	P42125	sp|P42125|ECI1_MOUSE Enoyl-CoA delta isomerase 1, mitochondrial OS=Mus musculus OX=10090 GN=Eci1 PE=1 SV=2	1	1.34842e-23	184.69	1	K	VGVVDEVVPEDQVHSKARSVMTKWLAIPDHS	X;X;X;X;X;X;X;X;X;X;X;X;X;X;X;Acetyl (K);X;X;X;X;Oxidation (M);X;Acetyl (K);X;X;X;X;X;X;X;X	PPPPPPPPPPPPPPPPPPXXXXXXXXXXXXX	VGVVDEVVPEDQVHSK(1)AR	16	2	0.71145		36283;36284;36285;36286;36287;36288;36289;36290;36291;36292;36293;36294	36294	341670	368190	204960	332300	471720	426380
P42125	48	P42125	P42125	sp|P42125|ECI1_MOUSE Enoyl-CoA delta isomerase 1, mitochondrial OS=Mus musculus OX=10090 GN=Eci1 PE=1 SV=2	1	1.87395e-08	92.812	1	K	RVLVETEGPAGVAVMKLRNPPVNSLSLECLT	X;X;X;X;X;X;X;X;X;X;X;X;X;X;Oxidation (M);Acetyl (K);X;X;X;X;X;X;X;X;X;X;X;X;X;X;X	XPPPPPPPPPPPPPPPPPXXXXXXXXXXXXX	VLVETEGPAGVAVMK(1)LR	15	2	-6.8643		37077	37077	0	0	0	0	0	37338
P42669	272	P42669	P42669	sp|P42669|PURA_MOUSE Transcriptional activator protein Pur-alpha OS=Mus musculus OX=10090 GN=Pura PE=1 SV=1	1	0.000507063	85.012	1	K	TVPYKVWAKFGHTFCKYSEEMKKIQEKQREK	X;X;X;X;X;X;X;X;X;X;X;X;X;X;X;Acetyl (K);X;X;X;X;X;X;X;X;X;X;X;X;X;X;X	XXXXXXXXXPPPPPPPPPPPPPXXXXXXXXX	FGHTFCK(1)YSEEMK	7	2	0.29681		6147	6147	0	0	0	0	0	6441.9
P42932	318	P42932	P42932	sp|P42932|TCPQ_MOUSE T-complex protein 1 subunit theta OS=Mus musculus OX=10090 GN=Cct8 PE=1 SV=3	1	0.0330489	46.046	1	K	HYANKYNIMLVRLNSKWDLRRLCKTVGATAL	X;X;X;X;X;X;X;X;X;X;X;X;X;X;X;Acetyl (K);X;X;X;X;X;X;X;X;X;X;X;X;X;X;X	XXXXXXXXXXXXPPPPPPPPXXXXXXXXXXX	LNSK(1)WDLR	4	2	0.35527		18134	18134	0	0	42171	0	0	0
P43274	17	P43274	P43274	sp|P43274|H14_MOUSE Histone H1.4 OS=Mus musculus OX=10090 GN=H1-4 PE=1 SV=2	1	2.15701e-30	167.24	1	K	SETAPAAPAAPAPAEKTPVKKKARKAAGGAK	X;X;X;X;X;X;X;X;X;X;X;X;X;X;X;Acetyl (K);X;X;X;X;X;X;X;X;X;X;X;X;X;X;X	PPPPPPPPPPPPPPPPPPPPXXXXXXXXXXX	SETAPAAPAAPAPAEK(1)TPVK	16	2	2.4339		24982;24983;24984;24985;24986;24987;24988;24989;24990;24991	24991	867310	948790	1092700	889470	1045600	956210
P43277	17	P43277	P43277	sp|P43277|H13_MOUSE Histone H1.3 OS=Mus musculus OX=10090 GN=H1-3 PE=1 SV=2	1	3.69539e-06	63.844	1	K	SETAPAAPAAPAPVEKTPVKKKAKKTGAAAG	X;X;X;X;X;X;X;X;X;X;X;X;X;X;X;Acetyl (K);X;X;X;X;X;X;X;X;X;X;X;X;X;X;X	PPPPPPPPPPPPPPPPPPPPXXXXXXXXXXX	SETAPAAPAAPAPVEK(1)TPVK	16	2	-0.84229		24992;24993;24994	24994	11629	24631	19795	0	0	0
P45376	62	P45376	P45376	sp|P45376|ALDR_MOUSE Aldo-keto reductase family 1 member B1 OS=Mus musculus OX=10090 GN=Akr1b1 PE=1 SV=3	1	0.00184575	77.28	1	K	QVYQNEKEVGVALQEKLKEQVVKRQDLFIVS	X;X;X;X;X;X;X;X;X;X;X;X;X;X;X;Acetyl (K);X;X;X;X;X;X;X;X;X;X;X;X;X;X;X	XXXXXXXPPPPPPPPPPPXXXXXXXXXXXXX	EVGVALQEK(1)LK	9	2	-2.0132		5486;5487	5487	21179	13826	0	0	0	0
P45376;Q8VC28	177;183	P45376	P45376	sp|P45376|ALDR_MOUSE Aldo-keto reductase family 1 member B1 OS=Mus musculus OX=10090 GN=Akr1b1 PE=1 SV=3;sp|Q8VC28|AK1CD_MOUSE Aldo-keto reductase family 1 member C13 OS=Mus musculus OX=10090 GN=Akr1c13 PE=1 SV=2	0.999997	0.00679931	58.109	1	K	FNPLQIERILNKPGLKYKPAVNQIECHPYLT	X;X;X;X;X;X;X;X;X;X;X;X;X;X;X;Acetyl (K);X;X;X;X;X;X;X;X;X;X;X;X;X;X;X	XXXXXXXXPPPPPPPPPPXXXXXXXXXXXXX	ILNKPGLK(1)YK	8	2	-1.1237		13670;13671;13672;13673	13671	53312	44668	0	16511	24074	0
P45376	86	P45376	P45376	sp|P45376|ALDR_MOUSE Aldo-keto reductase family 1 member B1 OS=Mus musculus OX=10090 GN=Akr1b1 PE=1 SV=3	1	7.96773e-05	126.8	1	K	QDLFIVSKLWCTFHDKSMVKGAFQKTLSDLQ	X;X;X;X;X;X;X;X;X;X;X;X;X;X;X;Acetyl (K);X;X;X;X;X;X;X;X;X;X;X;X;X;X;X	XXXXXXXXPPPPPPPPPPPPXXXXXXXXXXX	LWCTFHDK(1)SMVK	8	2	-3.3896		19265;19266;19267	19267	10999	10043	0	0	5310.9	0
P45481	13	P45481	P45481	sp|P45481|CBP_MOUSE Histone lysine acetyltransferase CREBBP OS=Mus musculus OX=10090 GN=Crebbp PE=1 SV=3	1	8.68897e-05	105.33	1	K	___MAENLLDGPPNPKRAKLSSPGFSANDNT	X;X;X;X;X;X;X;X;X;X;X;X;X;X;X;Acetyl (K);X;X;X;X;X;X;X;X;X;X;X;X;X;X;X	XXXXPPPPPPPPPPPPPXXXXXXXXXXXXXX	AENLLDGPPNPK(1)R	12	2	-1.6705		629;630;631	631	66429	55650	0	19509	0	0
P45481	1584	P45481	P45481	sp|P45481|CBP_MOUSE Histone lysine acetyltransferase CREBBP OS=Mus musculus OX=10090 GN=Crebbp PE=1 SV=3	1	9.61957e-61	186.24	1;2	K	STAASETPEGSQGDSKNAKKKNNKKTNKNKS	X;X;X;X;X;X;X;X;X;X;X;X;X;X;X;Acetyl (K);X;X;Acetyl (K);X;X;X;X;X;X;X;X;Acetyl (K);X;Acetyl (K);X	PPPPPPPPPPPPPPPPPPPPXXXXXXXXXXX	EESTAASETPEGSQGDSK(1)NAK(1)K	18	2	-1.813		4618;4619;4620;4621;4622;4623;4624;4625;4626;4627;4628;4629	4629	110420	133580	142300	235090	151050	156980
P45481	1587	P45481	P45481	sp|P45481|CBP_MOUSE Histone lysine acetyltransferase CREBBP OS=Mus musculus OX=10090 GN=Crebbp PE=1 SV=3	1	1.61633e-23	116.9	2	K	ASETPEGSQGDSKNAKKKNNKKTNKNKSSIS	X;X;X;X;X;X;X;X;X;X;X;X;Acetyl (K);X;X;Acetyl (K);X;X;X;X;X;X;X;X;Acetyl (K);X;Acetyl (K);X;X;X;X	PPPPPPPPPPPPPPPPPXXXXXXXXXXXXXX	EESTAASETPEGSQGDSK(1)NAK(1)K	21	2	-1.813		4624;4625;4626;4627;4628;4629	4629	44761	55476	53865	90650	57863	62560
P45481	1745	P45481	P45481	sp|P45481|CBP_MOUSE Histone lysine acetyltransferase CREBBP OS=Mus musculus OX=10090 GN=Crebbp PE=1 SV=3	1	3.84393e-23	100.86	1	K	CINCYNTKSHTHKMVKWGLGLDDEGSSQGEP	X;X;X;X;X;X;X;X;X;X;X;X;X;X;X;Acetyl (K);X;X;X;X;X;X;X;X;X;X;X;X;X;X;X	XXXXXXXXXXXXXPPPPPPPPPPPPPPPPPP	MVK(1)WGLGLDDEGSSQGEPQSK	3	2	-1.1169		20504;20505;20506;20507;20508;20509	20509	121840	146410	212980	166870	152660	128390
P45481	1015	P45481	P45481	sp|P45481|CBP_MOUSE Histone lysine acetyltransferase CREBBP OS=Mus musculus OX=10090 GN=Crebbp PE=1 SV=3	1	0.000838984	68.983	1	K	TEVQTDDAEPEPTESKGEPRSEMMEEDLQGS	X;X;X;X;X;X;X;X;X;X;X;X;X;X;X;Acetyl (K);X;X;X;X;X;X;X;X;X;X;X;X;X;X;X	PPPPPPPPPPPPPPPPPPPPXXXXXXXXXXX	TEVQTDDAEPEPTESK(1)GEPR	16	2	-3.6947		29163;29164	29164	0	5761.6	0	2069.1	0	0
P45481	1596	P45481	P45481	sp|P45481|CBP_MOUSE Histone lysine acetyltransferase CREBBP OS=Mus musculus OX=10090 GN=Crebbp PE=1 SV=3	1	0.00424372	75.829	2	K	GDSKNAKKKNNKKTNKNKSSISRANKKKPSM	X;X;X;Acetyl (K);X;X;Acetyl (K);X;X;X;X;X;X;X;X;Acetyl (K);X;Acetyl (K);X;X;X;X;X;X;X;X;X;X;X;X;X	XXXXXXXXXXXXXPPPPPPPPPPXXXXXXXX	TNK(1)NK(1)SSISR	3	2	-0.44658		32313;32314;32315;32316	32316	0	0	8239.8	10611	10021	8444.8
P45481	1598	P45481	P45481	sp|P45481|CBP_MOUSE Histone lysine acetyltransferase CREBBP OS=Mus musculus OX=10090 GN=Crebbp PE=1 SV=3	1	0.00424372	75.829	2	K	SKNAKKKNNKKTNKNKSSISRANKKKPSMPN	X;Acetyl (K);X;X;Acetyl (K);X;X;X;X;X;X;X;X;Acetyl (K);X;Acetyl (K);X;X;X;X;X;X;X;X;X;X;X;X;X;X;X	XXXXXXXXXXXPPPPPPPPPPXXXXXXXXXX	TNK(1)NK(1)SSISR	5	2	-0.44658		32313;32314;32315;32316	32316	0	0	8239.8	10611	10021	8444.8
P45952	178	P45952	P45952	sp|P45952|ACADM_MOUSE Medium-chain specific acyl-CoA dehydrogenase, mitochondrial OS=Mus musculus OX=10090 GN=Acadm PE=1 SV=1	0.998471	1.78382e-07	151.27	1	K	PSAGSDVAAIKTKAEKKGDEYVINGQKMWIT	X;X;X;X;X;X;X;X;X;X;X;X;X;X;X;Acetyl (K);X;X;X;X;X;X;X;X;X;X;X;Oxidation (M);X;X;X	XXXXXXXXXXXXXPPPPPPPPPPPPPPXXXX	AEK(0.998)K(0.002)GDEYVINGQK	3	2	-0.43291		580;581;582;583;584;585	581	11836	9574	5624.2	9839.5	18213	5668
P45952	235	P45952	P45952	sp|P45952|ACADM_MOUSE Medium-chain specific acyl-CoA dehydrogenase, mitochondrial OS=Mus musculus OX=10090 GN=Acadm PE=1 SV=1	1	2.5973e-29	153.42	1	K	TGFIVEADTPGIHIGKKELNMGQRCSDTRGI	X;X;X;X;X;X;X;X;X;X;X;X;X;X;X;Acetyl (K);X;X;X;X;X;X;X;X;X;X;X;X;X;X;X	PPPPPPPPPPPPPPPPPXXXXXXXXXXXXXX	AFTGFIVEADTPGIHIGK(1)K	18	2	-3.8572		814;815;816;817;818;819	819	30929	60572	130010	47181	83248	82519
P45952	301	P45952	P45952	sp|P45952|ACADM_MOUSE Medium-chain specific acyl-CoA dehydrogenase, mitochondrial OS=Mus musculus OX=10090 GN=Acadm PE=1 SV=1	1	1.18629e-30	161.72	1	K	AGAVGLAQRALDEATKYALDRKTFGKLLVEH	X;X;X;X;X;X;X;X;X;X;X;X;X;X;X;Acetyl (K);X;X;X;X;X;X;X;X;X;X;X;X;X;X;X	XXXXXXXXXPPPPPPPPPPPPXXXXXXXXXX	ALDEATK(1)YALDR	7	2	1.4649		1482;1483;1484;1485;1486;1487	1487	339800	338840	411820	362300	415420	395980
P45952	69	P45952	P45952	sp|P45952|ACADM_MOUSE Medium-chain specific acyl-CoA dehydrogenase, mitochondrial OS=Mus musculus OX=10090 GN=Acadm PE=1 SV=1	1	1.22375e-12	101.63	1	K	KFAREEIIPVAPEYDKSGEYPFPLIKRAWEL	X;X;X;X;X;X;X;X;X;X;X;X;X;X;X;Acetyl (K);X;X;X;X;X;X;X;X;X;Acetyl (K);X;X;X;X;X	XXXXPPPPPPPPPPPPPPPPPPPPPPXXXXX	EEIIPVAPEYDK(1)SGEYPFPLIK	12	2	-1.2079		4572;4573;4574;4575	4575	0	0	17844	18510	23258	14985
P45952	79	P45952	P45952	sp|P45952|ACADM_MOUSE Medium-chain specific acyl-CoA dehydrogenase, mitochondrial OS=Mus musculus OX=10090 GN=Acadm PE=1 SV=1	1	4.53368e-10	98.776	1	K	APEYDKSGEYPFPLIKRAWELGLINAHIPES	X;X;X;X;X;X;X;X;X;X;X;X;X;X;X;Acetyl (K);X;X;X;X;X;X;X;X;X;X;X;X;X;X;X	XXXXXXPPPPPPPPPPPXXXXXXXXXXXXXX	SGEYPFPLIK(1)R	10	2	-1.0374		25361;25362;25363;25364;25365;25366	25366	688220	585780	759120	599940	700960	650070
P45952	418	P45952	P45952	sp|P45952|ACADM_MOUSE Medium-chain specific acyl-CoA dehydrogenase, mitochondrial OS=Mus musculus OX=10090 GN=Acadm PE=1 SV=1	1	1.23623e-05	89.185	1	K	TAQIQRLIIAREHIEKYKN____________	X;X;X;X;X;X;X;X;X;X;X;X;X;X;X;Acetyl (K);X;X;X;X;X;X;X;X;X;X;X;X;X;X;X	XXXXXXXXXXXPPPPPPPXXXXXXXXXXXXX	EHIEK(1)YK	5	2	-1.383		4813;4814;4815	4815	56430	0	0	9544.1	0	28816
P45952	271	P45952	P45952	sp|P45952|ACADM_MOUSE Medium-chain specific acyl-CoA dehydrogenase, mitochondrial OS=Mus musculus OX=10090 GN=Acadm PE=1 SV=1	1	4.12683e-10	74.38	1	K	RVPKENVLIGEGAGFKIAMGAFDRTRPTVAA	X;X;X;X;X;X;X;X;X;X;X;X;X;X;X;Acetyl (K);X;X;Oxidation (M);X;X;X;X;X;X;X;X;X;X;X;X	XXXXPPPPPPPPPPPPPPPPPPPPXXXXXXX	ENVLIGEGAGFK(1)IAMGAFDR	12	2	-1.1887		5217	5217	0	0	19461	0	0	0
P45952	212	P45952	P45952	sp|P45952|ACADM_MOUSE Medium-chain specific acyl-CoA dehydrogenase, mitochondrial OS=Mus musculus OX=10090 GN=Acadm PE=1 SV=1	1	0.00251058	88.608	1	K	KANWYFLLARSNPDPKVPASKAFTGFIVEAD	X;X;X;X;X;X;X;X;X;X;X;X;X;X;X;Acetyl (K);X;X;X;X;X;X;X;X;X;X;X;X;X;X;X	XXXXXXXXXXPPPPPPPPPPPXXXXXXXXXX	SNPDPK(1)VPASK	6	2	0.42561		26541;26542;26543;26544	26544	0	628230	554700	608550	559990	0
P62492;P46638	61;61	P62492	P62492	sp|P62492|RB11A_MOUSE Ras-related protein Rab-11A OS=Mus musculus OX=10090 GN=Rab11a PE=1 SV=3;sp|P46638|RB11B_MOUSE Ras-related protein Rab-11B OS=Mus musculus OX=10090 GN=Rab11b PE=1 SV=3	1	1.07744e-05	85.318	1	K	VEFATRSIQVDGKTIKAQIWDTAGQERYRAI	X;X;X;X;X;X;X;X;X;X;X;X;X;X;X;Acetyl (K);X;X;X;X;X;X;X;X;X;X;X;X;X;X;X	XXXXXXXXXXXXXPPPPPPPPPPPPPPXXXX	TIK(1)AQIWDTAGQER	3	2	-2.1663		30871	30871	7854.5	0	0	0	0	0
P47199	186	P47199	P47199	sp|P47199|QOR_MOUSE Quinone oxidoreductase OS=Mus musculus OX=10090 GN=Cryz PE=1 SV=1	1	0.00387168	56.066	1	K	AHGLKVLGTAGSEEGKKLVLQNGAHEVFNHK	X;X;X;X;X;X;X;X;X;X;X;X;X;X;X;Acetyl (K);X;X;X;X;X;X;X;X;X;X;X;X;X;X;X	XXXXXPPPPPPPPPPPPXXXXXXXXXXXXXX	VLGTAGSEEGK(1)K	11	2	-1.4303		36837;36838;36839	36839	0	13680	11689	12275	0	0
P47738	443	P47738	P47738	sp|P47738|ALDH2_MOUSE Aldehyde dehydrogenase, mitochondrial OS=Mus musculus OX=10090 GN=Aldh2 PE=1 SV=1	1	2.20882e-08	146.32	1	K	KFKTIEEVVGRANDSKYGLAAAVFTKDLDKA	X;X;X;X;X;X;X;X;X;X;X;X;X;X;X;Acetyl (K);X;X;X;X;X;X;X;X;X;X;X;X;X;X;X	XXXXXXXXXXXPPPPPPPPPPPPPPPXXXXX	ANDSK(1)YGLAAAVFTK	5	2	-0.1167		1967;1968;1969;1970;1971;1972	1972	30452	43251	48236	9993.2	30810	24441
P47738	385	P47738	P47738	sp|P47738|ALDH2_MOUSE Aldehyde dehydrogenase, mitochondrial OS=Mus musculus OX=10090 GN=Aldh2 PE=1 SV=1	1	1.78931e-53	211.1	1	K	KKILGYIKSGQQEGAKLLCGGGAAADRGYFI	Acetyl (K);X;X;X;X;X;X;X;X;X;X;X;X;X;X;Acetyl (K);X;X;X;X;X;X;X;X;X;X;X;X;X;X;X	XXXXXXXXPPPPPPPPPPPPPPPPPPPXXXX	SGQQEGAK(1)LLCGGGAAADR	8	2	-0.79199		25487;25488;25489;25490;25491;25492	25492	49307	67663	55230	60160	64429	57380
P47738	370	P47738	P47738	sp|P47738|ALDH2_MOUSE Aldehyde dehydrogenase, mitochondrial OS=Mus musculus OX=10090 GN=Aldh2 PE=1 SV=1	1	1.24781e-68	294.63	1	K	DSRTEQGPQVDETQFKKILGYIKSGQQEGAK	X;X;X;X;X;X;X;X;X;X;X;X;X;X;X;Acetyl (K);X;X;X;X;X;X;X;X;X;X;X;X;X;X;Acetyl (K)	XXXPPPPPPPPPPPPPPXXXXXXXXXXXXXX	TEQGPQVDETQFK(1)K	13	2	-4.2199		29095;29096;29097;29098;29099;29100	29100	383580	412200	374040	356680	354480	338210
P47738	80	P47738	P47738	sp|P47738|ALDH2_MOUSE Aldehyde dehydrogenase, mitochondrial OS=Mus musculus OX=10090 GN=Aldh2 PE=1 SV=1	0.845912	1.2012e-09	52.428	1	K	EVICQVAEGNKEDVDKAVKAARAAFQLGSPW	X;X;X;X;X;X;X;X;X;X;X;X;X;X;X;Acetyl (K);X;X;X;X;X;X;X;X;X;X;X;X;X;X;X	PPPPPPPPPPPPPPPPPPPXXXXXXXXXXXX	TFPTVNPSTGEVICQVAEGNK(0.154)EDVDK(0.846)AVK	26	3	0.16179		29544;29545;29546;29547	29547	60616	55561	0	62773	0	53380
P47738	513	P47738	P47738	sp|P47738|ALDH2_MOUSE Aldehyde dehydrogenase, mitochondrial OS=Mus musculus OX=10090 GN=Aldh2 PE=1 SV=1	1	0.0133606	20.39	1	K	EYGLQAYTEVKTVTVKVPQKNS_________	X;X;X;X;X;X;X;X;X;X;X;X;X;X;X;Acetyl (K);X;X;X;X;X;X;X;X;X;X;X;X;X;X;X	XXXXXXXXXXXPPPPPPPPPXXXXXXXXXXX	TVTVK(1)VPQK	5	2	0.43386		34547;34548	34548	0	0	37661	35961	0	0
P47738	157	P47738	P47738	sp|P47738|ALDH2_MOUSE Aldehyde dehydrogenase, mitochondrial OS=Mus musculus OX=10090 GN=Aldh2 PE=1 SV=1	1	0.000397381	111.53	1	K	DMVLKCLRYYAGWADKYHGKTIPIDGDFFSY	X;X;X;X;X;X;X;X;X;X;X;X;X;X;X;Acetyl (K);X;X;X;X;X;X;X;X;X;X;X;X;X;X;X	XXXXXXXXPPPPPPPPPPPPXXXXXXXXXXX	YYAGWADK(1)YHGK	8	2	0.77897		40071;40072;40073	40073	13907	15484	0	0	4026	0
P47802	38	P47802	P47802	sp|P47802|MTX1_MOUSE Metaxin-1 OS=Mus musculus OX=10090 GN=Mtx1 PE=1 SV=1	1	0.00706518	75.977	1	K	SLAVLTYTRFTGAPLKIHKTSNPWQSPSGTL	X;X;X;X;X;X;X;X;X;X;X;X;X;X;X;Acetyl (K);X;X;X;X;X;X;X;X;X;X;X;X;X;X;X	XXXXXXXXXPPPPPPPPPPXXXXXXXXXXXX	FTGAPLK(1)IHK	7	2	-1.2105		7127;7128;7129;7130;7131	7131	26720	20042	25055	23495	0	25552
P47857	727	P47857	P47857	sp|P47857|PFKAM_MOUSE ATP-dependent 6-phosphofructokinase, muscle type OS=Mus musculus OX=10090 GN=Pfkm PE=1 SV=3	1	1.02739e-10	66.853	1	K	GMRKRALVFQPVTELKDQTDFEHRIPKEQWW	X;X;X;X;X;X;X;X;X;X;X;X;X;X;X;Acetyl (K);X;X;X;X;X;X;X;X;X;X;X;X;X;X;X	XXXXXPPPPPPPPPPPPPPPPPPPXXXXXXX	ALVFQPVTELK(1)DQTDFEHR	11	3	-1.6959		1752;1753;1754;1755;1756;1757	1757	6135.6	8669.7	17896	8179.7	15484	4507.2
P47857	615	P47857	P47857	sp|P47857|PFKAM_MOUSE ATP-dependent 6-phosphofructokinase, muscle type OS=Mus musculus OX=10090 GN=Pfkm PE=1 SV=3	1	0.0010123	57.638	1	K	FTIRDLQVNVEHLVQKMKTTVKRGLVLRNEK	X;X;X;X;X;X;X;X;X;X;X;X;X;X;X;Acetyl (K);X;X;X;X;X;X;X;X;X;X;X;X;X;X;X	XXXXPPPPPPPPPPPPPPXXXXXXXXXXXXX	DLQVNVEHLVQK(1)MK	12	2	0.88224		3894;3895;3896	3896	7442.3	7144.6	9438.1	0	0	0
P47857	372	P47857	P47857	sp|P47857|PFKAM_MOUSE ATP-dependent 6-phosphofructokinase, muscle type OS=Mus musculus OX=10090 GN=Pfkm PE=1 SV=3	1	0.000175031	84.382	1	K	DVTKAMDEKRFDEAIKLRGRSFMNNWEVYKL	X;X;X;X;X;X;X;X;X;X;X;X;X;X;X;Acetyl (K);X;X;X;X;X;X;Oxidation (M);X;X;X;X;X;X;X;X	XXXXXXXXXPPPPPPPPPXXXXXXXXXXXXX	RFDEAIK(1)LR	7	2	-1.1215		5821;5822;5823;5824;5825;24177	24177	31662	0	20557	18228	23210	14365
P47934	268	P47934	P47934	sp|P47934|CACP_MOUSE Carnitine O-acetyltransferase OS=Mus musculus OX=10090 GN=Crat PE=1 SV=3	1	0.000213527	104.2	1;2	K	SNHRNTWAKAYNNLIKDKVNRESVNSIQKSI	X;X;X;X;X;X;X;X;Acetyl (K);X;X;X;X;X;X;Acetyl (K);X;Acetyl (K);X;X;X;X;X;X;X;X;X;X;X;X;X	XXXXPPPPPPPPPPPPPPPPPXXXXXXXXXX	NTWAK(1)AYNNLIK(1)DK	12	2	-4.0382		2975;2976;2977;2978;2979;2980;2981;2982;2983;2984;2985;2986;21701	21701	441190	510030	421980	323330	471120	477470
P47934	270	P47934	P47934	sp|P47934|CACP_MOUSE Carnitine O-acetyltransferase OS=Mus musculus OX=10090 GN=Crat PE=1 SV=3	1	0.000397855	113.05	2	K	HRNTWAKAYNNLIKDKVNRESVNSIQKSIFT	X;X;X;X;X;X;Acetyl (K);X;X;X;X;X;X;Acetyl (K);X;Acetyl (K);X;X;X;X;X;X;X;X;X;X;X;X;X;X;X	XXXXXXXPPPPPPPPPPPPXXXXXXXXXXXX	AYNNLIK(1)DK(1)VNR	9	2	0.96297		2981;2982;2983;2984;2985;2986	2986	25088	28191	28715	11704	26396	28128
P47934	390	P47934	P47934	sp|P47934|CACP_MOUSE Carnitine O-acetyltransferase OS=Mus musculus OX=10090 GN=Crat PE=1 SV=3	1	0.000167413	107.21	1	K	LPMPKKLRFNITPEIKNDIEKAKQNLSIMIQ	X;X;X;X;X;X;X;X;X;X;X;X;X;X;X;Acetyl (K);X;X;X;X;X;X;X;X;X;X;X;X;X;X;X	XXXXXXXXPPPPPPPPPPPPPXXXXXXXXXX	FNITPEIK(1)NDIEK	8	2	-1.3456		6847;6848;6849;6850;6851;6852	6852	119150	175160	147140	135600	136190	119720
P47934	492	P47934	P47934	sp|P47934|CACP_MOUSE Carnitine O-acetyltransferase OS=Mus musculus OX=10090 GN=Crat PE=1 SV=3	1	1.06904e-08	70.513	1	K	AFVKGMGDSTVPEQQKVELLRKAVQAHRAYT	X;X;X;X;X;Oxidation (M);X;X;X;X;X;X;X;X;X;Acetyl (K);X;X;X;X;X;X;X;X;X;X;X;X;X;X;X	XXXXPPPPPPPPPPPPPPPPPXXXXXXXXXX	GMGDSTVPEQQK(1)VELLR	12	2	-0.83102		8887;8888;8889;8890	8890	0	18744	11383	16651	12332	0
P47934	609	P47934	P47934	sp|P47934|CACP_MOUSE Carnitine O-acetyltransferase OS=Mus musculus OX=10090 GN=Crat PE=1 SV=3	1	2.64045e-06	134.78	1	K	SCAETNAARMAHYLEKALLDMRTLLQNHPRA	X;X;X;X;X;X;X;X;X;Oxidation (M);X;X;X;X;X;Acetyl (K);X;X;X;X;Oxidation (M);X;X;X;X;X;X;X;X;X;X	XXXXXXXXXPPPPPPPPPPPPPXXXXXXXXX	MAHYLEK(1)ALLDMR	7	2	1.3739		19429;19430;19431;19432;19433;19434;19435;19436;19437;19438;19439;19440;19441;19442;19443;19444;19445;19446;19447;19448;19449;19450;19451;19452;19453;19454;19455;19456;19457;19458;19459;19460;19461;19462;19463;19464;19465;19466;19467;19468;19469;19470;19471;19472;19473;19474;19475;19476;19477;19478	19478	500810	821340	737710	246930	379880	351350
P47934	315	P47934	P47934	sp|P47934|CACP_MOUSE Carnitine O-acetyltransferase OS=Mus musculus OX=10090 GN=Crat PE=1 SV=3	1	5.16213e-55	259.71	1	K	YRNHVAGQMLHGGGSKFNSGNRWFDKTLQFI	X;X;X;X;X;X;X;X;Oxidation (M);X;X;X;X;X;X;Acetyl (K);X;X;X;X;X;X;X;X;X;X;X;X;X;X;X	XXPPPPPPPPPPPPPPPPPPPPXXXXXXXXX	NHVAGQMLHGGGSK(1)FNSGNR	14	3	-1.6586		20978;20979;20980;20981;20982;20983;20984;20985;20986;20987;20988;20989;20990;20991	20991	337370	336290	401740	180620	270400	341200
P47934	261	P47934	P47934	sp|P47934|CACP_MOUSE Carnitine O-acetyltransferase OS=Mus musculus OX=10090 GN=Crat PE=1 SV=3	1	1.16058e-41	222.41	1;2	K	EPVGILTSNHRNTWAKAYNNLIKDKVNRESV	X;X;X;X;X;X;X;X;X;X;X;X;X;X;X;Acetyl (K);X;X;X;X;X;X;Acetyl (K);X;Acetyl (K);X;X;X;X;X;X	XXXXXXXXXXXPPPPPPPPPPPPPPXXXXXX	NTWAK(1)AYNNLIK(1)DK	5	2	-4.0382		21695;21696;21697;21698;21699;21700;21701	21701	871650	938800	842370	725680	1058500	1115800
P47934	195	P47934	P47934	sp|P47934|CACP_MOUSE Carnitine O-acetyltransferase OS=Mus musculus OX=10090 GN=Crat PE=1 SV=3	1	1.74196e-15	175.29	1	K	CRVPGPKQDSVVNFLKSKRPPTHITVVHNYQ	X;X;X;X;X;X;X;X;X;X;X;X;X;X;X;Acetyl (K);X;X;X;X;X;X;X;X;X;X;X;X;X;X;X	XXXXXXXPPPPPPPPPPPXXXXXXXXXXXXX	QDSVVNFLK(1)SK	9	2	-3.644		23225;23226;23227;23228	23228	201160	0	0	96030	187570	197050
P47934	290	P47934	P47934	sp|P47934|CACP_MOUSE Carnitine O-acetyltransferase OS=Mus musculus OX=10090 GN=Crat PE=1 SV=3	1	8.52263e-22	160.92	1	K	SVNSIQKSIFTVCLDKQVPRVSDDVYRNHVA	X;X;X;X;X;X;X;X;X;X;X;X;X;X;X;Acetyl (K);X;X;X;X;X;X;X;X;X;X;X;X;X;X;X	XXXXXXXPPPPPPPPPPPPPXXXXXXXXXXX	SIFTVCLDK(1)QVPR	9	2	-1.7101		25683;25684;25685;25686;25687;25688;25689;25690	25690	109730	157060	261470	126500	208310	183470
P47968	260	P47968	P47968	sp|P47968|RPIA_MOUSE Ribose-5-phosphate isomerase OS=Mus musculus OX=10090 GN=Rpia PE=1 SV=2	1	0.000408106	96.872	1	K	DNGNFILDWKFDRVHKWSEVNTAIKMTPGVV	X;X;X;X;X;X;X;X;X;X;X;X;X;X;X;Acetyl (K);X;X;X;X;X;X;X;X;X;X;X;X;X;X;X	XXXXXXXXXXXXXPPPPPPPPPPPPXXXXXX	VHK(1)WSEVNTAIK	3	2	-0.61041		36332;36333;36334;36335;36336;36337	36337	22415	22160	22065	16057	17998	20485
P48036	74	P48036	P48036	sp|P48036|ANXA5_MOUSE Annexin A5 OS=Mus musculus OX=10090 GN=Anxa5 PE=1 SV=1	1	0.030646	19.663	1	K	FGRDLVDDLKSELTGKFEKLIVAMMKPSRLY	X;X;X;X;X;X;X;X;X;X;X;X;X;X;X;Acetyl (K);X;X;X;X;X;X;X;X;X;X;X;X;X;X;X	XXXXXXXXXXPPPPPPPPPXXXXXXXXXXXX	SELTGK(1)FEK	6	2	0.23226		24949;24950	24950	85166	0	0	0	50204	0
P48678	270	P48678	P48678	sp|P48678|LMNA_MOUSE Prelamin-A/C OS=Mus musculus OX=10090 GN=Lmna PE=1 SV=2	1	0.00234259	43.447	1	K	QVEQYKKELEKTYSAKLDNARQSAERNSNLV	X;X;X;X;X;X;X;X;X;X;X;X;X;X;X;Acetyl (K);X;X;X;X;X;X;X;X;X;X;X;X;X;X;X	XXXXXXXXXXXPPPPPPPPPPXXXXXXXXXX	TYSAK(1)LDNAR	5	2	0.27306		35029;35030;35031;35032	35032	31710	21627	0	13689	0	14906
P48758	49	P48758	P48758	sp|P48758|CBR1_MOUSE Carbonyl reductase [NADPH] 1 OS=Mus musculus OX=10090 GN=Cbr1 PE=1 SV=3	1	1.78725e-44	210.94	1	K	VLAARDEERGQTAVQKLQAEGLSPRFHQLDI	X;X;X;X;X;X;X;X;X;X;X;X;X;X;X;Acetyl (K);X;X;X;X;X;X;X;X;X;X;X;X;X;X;X	XXXXXXXXXPPPPPPPPPPPPPPPPXXXXXX	GQTAVQK(1)LQAEGLSPR	7	2	-1.3348		9153;9154;9155;9156;9157;9158	9158	99828	93552	102620	72011	85616	82821
P48758	28	P48758	P48758	sp|P48758|CBR1_MOUSE Carbonyl reductase [NADPH] 1 OS=Mus musculus OX=10090 GN=Cbr1 PE=1 SV=3	1	0.00184902	52.42	1	K	ANKGIGFAITRDLCRKFSGDVVLAARDEERG	X;X;X;X;X;X;X;X;X;X;X;X;X;X;X;Acetyl (K);X;X;X;X;X;X;X;X;X;X;X;X;X;X;X	XXXXXXXXXXXXXXXPPPPPPPPPPPXXXXX	K(1)FSGDVVLAAR	1	2	-0.38686		14928;14929;14930;14931;14932	14932	0	14085	11499	8846.4	10238	9043.1
P48758	157	P48758	P48758	sp|P48758|CBR1_MOUSE Carbonyl reductase [NADPH] 1 OS=Mus musculus OX=10090 GN=Cbr1 PE=1 SV=3	1	0.000175031	51.361	1	K	VSLRALKNCRLELQQKFRSETITEEELVGLM	X;X;X;X;X;X;X;X;X;X;X;X;X;X;X;Acetyl (K);X;X;X;X;X;X;X;X;X;X;X;X;X;X;X	XXXXXXXXXXPPPPPPPPXXXXXXXXXXXXX	LELQQK(1)FR	6	2	1.7963		15966;15967;15968;15969;15970;15971	15971	48497	34636	42177	26061	38047	34284
P48771	33	P48771	P48771	sp|P48771|CX7A2_MOUSE Cytochrome c oxidase subunit 7A2, mitochondrial OS=Mus musculus OX=10090 GN=Cox7a2 PE=1 SV=2	1	1.33035e-42	160.96	1	K	TTSRRHFENKVPEKQKLFQEDNGMPVHLKGG	X;X;X;X;X;X;X;X;X;X;X;X;X;X;X;Acetyl (K);X;X;X;X;X;X;X;Oxidation (M);X;X;X;X;X;X;X	XXXXXXXXXXXXXXPPPPPPPPPPPPPPPXX	QK(1)LFQEDNGMPVHLK	2	2	-0.070548		23623;23624;23625;23626;23627;23628;23629;23630;23631;23632;23633;23634	23634	179370	155210	42017	68423	99600	94341
P48774	97	P48774	P48774	sp|P48774|GSTM5_MOUSE Glutathione S-transferase Mu 5 OS=Mus musculus OX=10090 GN=Gstm5 PE=1 SV=1	1	0.00608286	49.48	1	K	YIARKHNMCGDTEEEKIRVDIMENQIMDFRM	X;X;X;X;X;X;X;X;X;X;X;X;X;X;X;Acetyl (K);X;X;X;X;X;X;X;X;X;X;X;X;X;X;X	XXXXXPPPPPPPPPPPPPXXXXXXXXXXXXX	HNMCGDTEEEK(1)IR	11	2	1.1579		11489	11489	4008.3	0	0	0	0	0
P48787	184	P48787	P48787	sp|P48787|TNNI3_MOUSE Troponin I, cardiac muscle OS=Mus musculus OX=10090 GN=Tnni3 PE=1 SV=2	0.999997	0.0197017	41.544	1	K	DLRAHLKQVKKEDIEKENREVGDWRKNIDAL	X;X;X;X;X;X;X;X;X;X;X;X;X;X;X;Acetyl (K);X;X;X;X;X;X;X;X;X;X;X;X;X;X;X	XXXXXXXXXXPPPPPPPPPXXXXXXXXXXXX	KEDIEK(1)ENR	6	2	-0.32833		14817	14817	12034	0	0	0	0	0
P48787	118	P48787	P48787	sp|P48787|TNNI3_MOUSE Troponin I, cardiac muscle OS=Mus musculus OX=10090 GN=Tnni3 PE=1 SV=2	1	0.0160589	28.501	1	K	ARVDKVDEERYDVEAKVTKNITEIADLTQKI	X;X;X;X;X;X;X;X;X;X;X;X;X;X;X;Acetyl (K);X;X;X;X;X;X;X;X;X;X;X;X;X;X;X	XXXXXXXXXXPPPPPPPPPXXXXXXXXXXXX	YDVEAK(1)VTK	6	2	-0.5152		38951	38951	14446	0	0	0	0	0
P48962	272	P48962	P48962	sp|P48962|ADT1_MOUSE ADP/ATP translocase 1 OS=Mus musculus OX=10090 GN=Slc25a4 PE=1 SV=4	1	2.25606e-24	165.37	1	K	CWRKIAKDEGANAFFKGAWSNVLRGMGGAFV	X;X;X;X;X;X;X;X;X;X;X;X;X;X;X;Acetyl (K);X;X;X;X;X;X;X;X;X;Oxidation (M);X;X;X;X;X	XXXXXXXPPPPPPPPPPPPPPPPPXXXXXXX	DEGANAFFK(1)GAWSNVLR	9	2	-1.3016		3468;3469;3470;3471;3472	3472	0	12257	59658	10627	16721	13773
P48962	23	P48962	P48962	sp|P48962|ADT1_MOUSE ADP/ATP translocase 1 OS=Mus musculus OX=10090 GN=Slc25a4 PE=1 SV=4	1	6.11445e-101	20.656	1	K	FLKDFLAGGIAAAVSKTAVAPIERVKLLLQV	X;X;X;X;X;X;X;X;X;X;X;X;X;X;X;Acetyl (K);X;X;X;X;X;X;X;X;X;Acetyl (K);X;X;X;X;X	XXXPPPPPPPPPPPPPPPPPPPPPXXXXXXX	DFLAGGIAAAVSK(1)TAVAPIER	13	2	-0.60969		3532;3533;3534;3535;3536;3537;3538;3539;3540;3541;3542;3543;3544;3545;3546	3546	1087800	3450100	4631800	3167600	3482500	3207900
P48962	163	P48962	P48962	sp|P48962|ADT1_MOUSE ADP/ATP translocase 1 OS=Mus musculus OX=10090 GN=Slc25a4 PE=1 SV=4	1	1.32477e-31	161.35	1	K	GSSQREFNGLGDCLTKIFKSDGLKGLYQGFS	X;X;X;X;X;X;X;X;X;X;X;X;X;X;X;Acetyl (K);X;X;Acetyl (K);X;X;X;X;X;X;X;X;X;X;X;X	XXXXXPPPPPPPPPPPPPPXXXXXXXXXXXX	EFNGLGDCLTK(1)IFK	11	2	-1.4877		4671;4672;4673;4674;4675;4676	4676	44805	70200	122920	49580	83112	80644
P48962	166	P48962	P48962	sp|P48962|ADT1_MOUSE ADP/ATP translocase 1 OS=Mus musculus OX=10090 GN=Slc25a4 PE=1 SV=4	1	0.0248415	42.318	1	K	QREFNGLGDCLTKIFKSDGLKGLYQGFSVSV	X;X;X;X;X;X;X;X;X;X;X;X;X;X;X;Acetyl (K);X;X;X;X;X;X;X;X;X;X;X;X;X;X;X	XXXXXXXXXXXXXPPPPPPPPXXXXXXXXXX	IFK(1)SDGLK	3	2	-1.8688		12900;12901;12902;12903;12904	12904	7891.3	8790.6	0	0	257230	255790
P48962	43	P48962	P48962	sp|P48962|ADT1_MOUSE ADP/ATP translocase 1 OS=Mus musculus OX=10090 GN=Slc25a4 PE=1 SV=4	1	2.42493e-14	25.986	1	K	PIERVKLLLQVQHASKQISAEKQYKGIIDCV	X;X;X;X;X;X;X;X;X;X;X;X;X;X;X;Acetyl (K);X;X;X;X;X;X;X;X;X;X;X;X;X;X;X	XXXXXXPPPPPPPPPPPPPPPPXXXXXXXXX	LLLQVQHASK(1)QISAEK	10	2	-0.38372		17695;17696;17697;17698	17698	81191	96350	61213	0	56931	0
P48962;P51881	33;33	P48962;P51881	P48962	sp|P48962|ADT1_MOUSE ADP/ATP translocase 1 OS=Mus musculus OX=10090 GN=Slc25a4 PE=1 SV=4;sp|P51881|ADT2_MOUSE ADP/ATP translocase 2 OS=Mus musculus OX=10090 GN=Slc25a5 PE=1 SV=3	1	6.80319e-22	188.2	1	K	AAAISKTAVAPIERVKLLLQVQHASKQITAD;AAAVSKTAVAPIERVKLLLQVQHASKQISAE	X;X;X;X;X;Acetyl (K);X;X;X;X;X;X;X;X;X;Acetyl (K);X;X;X;X;X;X;X;X;X;Acetyl (K);X;X;X;X;X	XXXXXXXXXXXXXXPPPPPPPPPPPPXXXXX	VK(1)LLLQVQHASK	2	2	1.2921		36686;36687;36688;36689;36690;36691	36691	783770	600990	634990	174020	698360	301920
P48962;P51881;Q3V132	92;92;105	P48962;P51881;Q3V132	P48962	sp|P48962|ADT1_MOUSE ADP/ATP translocase 1 OS=Mus musculus OX=10090 GN=Slc25a4 PE=1 SV=4;sp|P51881|ADT2_MOUSE ADP/ATP translocase 2 OS=Mus musculus OX=10090 GN=Slc25a5 PE=1 SV=3;sp|Q3V132|ADT4_MOUSE ADP/ATP translocase 4 OS=Mus musculus OX=10090 GN=Slc25a3	1	1.43151e-41	226.02	1	K	NVIRYFPTQALNFAFKDKYKELFMSGVNKEK;NVIRYFPTQALNFAFKDKYKQIFLGGVDKRT;NVIRYFPTQALNFAFKDKYKQIFLGGVDRHK	X;X;X;X;X;X;X;X;X;X;X;X;X;X;X;Acetyl (K);X;X;X;X;X;X;X;X;X;X;X;X;Acetyl (K);X;X	XXXXPPPPPPPPPPPPPPPPXXXXXXXXXXX	YFPTQALNFAFK(1)DK	12	2	-0.45502		39170;39171;39172;39173;39174;39175;39176;39177;39178;39179;39180;39181;39182;39183;39184	39182	4386300	6914500	8211700	4017000	8210700	6719700
P49312	298	P49312	P49312	sp|P49312|ROA1_MOUSE Heterogeneous nuclear ribonucleoprotein A1 OS=Mus musculus OX=10090 GN=Hnrnpa1 PE=1 SV=2	1	3.01253e-11	124.18	1	K	GRSSGPYGGGGQYFAKPRNQGGYGGSSSSSS	X;X;X;X;X;X;X;X;X;X;X;X;X;X;X;Acetyl (K);X;X;X;X;X;X;X;X;X;X;X;X;X;X;X	XXPPPPPPPPPPPPPPPPXXXXXXXXXXXXX	SSGPYGGGGQYFAK(1)PR	14	2	-1.0541		26961;26962;26963;26964;26965	26965	9246	13836	20752	0	13662	16490
P49615	56	P49615	P49615	sp|P49615|CDK5_MOUSE Cyclin-dependent-like kinase 5 OS=Mus musculus OX=10090 GN=Cdk5 PE=1 SV=1	1	0.000505792	63.228	1	K	DEGVPSSALREICLLKELKHKNIVRLHDVLH	X;X;X;X;X;X;X;X;X;X;X;X;X;X;X;Acetyl (K);X;X;X;X;X;X;X;X;X;X;X;X;X;X;X	XXXXXXXXXXPPPPPPPPPXXXXXXXXXXXX	EICLLK(1)ELK	6	2	-1.1686		4846;4847;4848	4848	34072	0	0	16420	21460	0
P49817	5	P49817	P49817	sp|P49817|CAV1_MOUSE Caveolin-1 OS=Mus musculus OX=10090 GN=Cav1 PE=1 SV=1	1	0.00163557	44.81	1	K	___________MSGGKYVDSEGHLYTVPIRE	X;X;X;X;X;X;X;X;X;X;X;X;X;X;X;Acetyl (K);X;X;X;X;X;X;X;X;X;X;X;X;X;X;X	XXXXXXXXXXXXPPPPPPPPPPPPPPPPPPX	SGGK(1)YVDSEGHLYTVPIR	4	2	-2.8493		25394	25394	0	0	34642	0	0	0
P50136	353	P50136	P50136	sp|P50136|ODBA_MOUSE 2-oxoisovalerate dehydrogenase subunit alpha, mitochondrial OS=Mus musculus OX=10090 GN=Bckdha PE=1 SV=1	1	0.00250397	47.22	1	K	DSSAYRSVDEVNYWDKQDHPISRLRQYLLNQ	X;X;X;X;X;X;X;X;X;X;X;X;X;X;X;Acetyl (K);X;X;X;X;X;X;X;X;X;X;X;X;X;X;X	XXXXXXPPPPPPPPPPPPPPPPPXXXXXXXX	SVDEVNYWDK(1)QDHPISR	10	2	-1.1242		27421;27422	27422	0	54977	22597	0	0	0
P50136	308	P50136	P50136	sp|P50136|ODBA_MOUSE 2-oxoisovalerate dehydrogenase subunit alpha, mitochondrial OS=Mus musculus OX=10090 GN=Bckdha PE=1 SV=1	1	1.40176e-08	122.05	1	K	IRVDGNDVFAVYNATKEARRRAVAENQPFLI	X;X;X;X;X;X;X;X;X;X;X;X;X;X;X;Acetyl (K);X;X;X;X;X;X;X;X;X;X;X;X;X;X;X	XXPPPPPPPPPPPPPPPPPXXXXXXXXXXXX	VDGNDVFAVYNATK(1)EAR	14	2	1.0977		35642;35643	35643	0	0	13057	0	0	4883.2
P50171	66	P50171	P50171	sp|P50171|DHB8_MOUSE (3R)-3-hydroxyacyl-CoA dehydrogenase OS=Mus musculus OX=10090 GN=Hsd17b8 PE=1 SV=2	1	3.26364e-09	92.096	1	K	RLLGSPGSEDGAPRGKHAAFQADVSQGPAAR	X;X;X;X;X;X;X;X;X;X;X;X;X;X;X;Acetyl (K);X;X;X;X;X;X;X;X;X;X;X;X;X;X;X	XXXXXXXXXXXXXXPPPPPPPPPPPPPPPPP	GK(1)HAAFQADVSQGPAAR	2	2	-2.2155		8524;8525;8526;8527;8528;8529;8530;8531;8532	8532	18589	37721	32288	27205	28118	22847
P50462	109	P50462	P50462	sp|P50462|CSRP3_MOUSE Cysteine and glycine-rich protein 3 OS=Mus musculus OX=10090 GN=Csrp3 PE=1 SV=1	1	2.12109e-13	114.78	1;2	K	QSPKPARAATTSNPSKFSAKFGESEKCPRCG	X;X;X;X;X;X;X;X;X;X;X;X;X;X;X;Acetyl (K);X;X;X;Acetyl (K);X;X;X;X;X;Acetyl (K);X;X;X;X;X	XXXXXXXPPPPPPPPPPPPPPPPPPPXXXXX	AATTSNPSK(1)FSAK(1)FGESEK	9	2	-3.3337		270;271;272;273;274;275;276;277;278	278	417000	310310	170080	44456	110530	70067
P50462	113	P50462	P50462	sp|P50462|CSRP3_MOUSE Cysteine and glycine-rich protein 3 OS=Mus musculus OX=10090 GN=Csrp3 PE=1 SV=1	1	2.12109e-13	123.62	1;2	K	PARAATTSNPSKFSAKFGESEKCPRCGKSVY	X;X;X;X;X;X;X;X;X;X;X;Acetyl (K);X;X;X;Acetyl (K);X;X;X;X;X;Acetyl (K);X;X;X;X;X;X;X;X;X	XXXPPPPPPPPPPPPPPPPPPPXXXXXXXXX	FSAK(1)FGESEK	4	2	5.5053		276;277;278;6982;6983;6984	6984	1128200	751520	14973	0	459520	0
P50462	119	P50462	P50462	sp|P50462|CSRP3_MOUSE Cysteine and glycine-rich protein 3 OS=Mus musculus OX=10090 GN=Csrp3 PE=1 SV=1	1	2.04469e-06	116.79	1	K	TSNPSKFSAKFGESEKCPRCGKSVYAAEKVM	X;X;X;X;X;Acetyl (K);X;X;X;X;X;X;X;X;X;Acetyl (K);X;X;X;X;X;X;X;X;X;X;X;X;Acetyl (K);X;X	XXXXXXXXXXPPPPPPPPPXXXXXXXXXXXX	FGESEK(1)CPR	6	2	-1.1519		6123;6124;6125;6126;6127;6128	6128	172860	159980	95289	71879	91577	75121
P50462	192	P50462	P50462	sp|P50462|CSRP3_MOUSE Cysteine and glycine-rich protein 3 OS=Mus musculus OX=10090 GN=Csrp3 PE=1 SV=1	1	4.05105e-25	159.82	1	K	GPTGIGFGGLTQQVEKKE_____________	X;X;X;X;X;X;X;X;X;X;X;X;X;X;X;Acetyl (K);X;X;X;X;X;X;X;X;X;X;X;X;X;X;X	PPPPPPPPPPPPPPPPPXXXXXXXXXXXXXX	NFGPTGIGFGGLTQQVEK(1)K	18	2	-3.0816		20869;20870;20871;20872;20873;20874	20874	194130	169230	120830	48869	121700	60532
P50462	162	P50462	P50462	sp|P50462|CSRP3_MOUSE Cysteine and glycine-rich protein 3 OS=Mus musculus OX=10090 GN=Csrp3 PE=1 SV=1	1	4.4343e-105	265.19	1	K	CAICGKSLESTNVTDKDGELYCKVCYAKNFG	X;X;X;X;X;X;X;X;X;X;X;X;X;X;X;Acetyl (K);X;X;X;X;X;X;X;X;X;X;X;X;X;X;X	XXXXXXPPPPPPPPPPPPPPPPPXXXXXXXX	SLESTNVTDK(1)DGELYCK	10	2	0.23289		25992;25993;25994;25995;25996;25997	25997	171260	130610	143340	99975	135960	84150
P50462	132	P50462	P50462	sp|P50462|CSRP3_MOUSE Cysteine and glycine-rich protein 3 OS=Mus musculus OX=10090 GN=Csrp3 PE=1 SV=1	1	1.04771e-09	134.71	1	K	SEKCPRCGKSVYAAEKVMGGGKPWHKTCFRC	X;X;Acetyl (K);X;X;X;X;X;X;X;X;X;X;X;X;Acetyl (K);X;X;X;X;X;X;X;X;X;X;X;X;X;X;X	XXXXXXXXXPPPPPPPPPPPPPPPPPXXXXX	SVYAAEK(1)VMGGGK	7	2	0.35229		27608;27609;27610;27611;27612;27613;27614;27615;27616;27617	27613	267150	189370	157190	106740	114050	112860
P50544	52	P50544	P50544	sp|P50544|ACADV_MOUSE Very long-chain specific acyl-CoA dehydrogenase, mitochondrial OS=Mus musculus OX=10090 GN=Acadvl PE=1 SV=3	1	2.49978e-79	221.35	1	K	AQRLYAREATQAVLDKPETLSSDASTREKPA	X;X;X;X;X;X;X;X;X;X;X;X;X;X;X;Acetyl (K);X;X;X;X;X;X;X;X;X;X;X;X;X;X;X	XXXXXXXPPPPPPPPPPPPPPPPPPPPXXXX	EATQAVLDK(1)PETLSSDASTR	9	2	-0.95252		4387;4388;4389;4390;4391;4392;4393;4394;4395;4396;4397;4398;4399;4400;4401;4402;4403;4404;4405;4406;4407;4408;4409;4410;4411	4411	238440	155440	220650	91097	105550	126390
P50544	122	P50544	P50544	sp|P50544|ACADV_MOUSE Very long-chain specific acyl-CoA dehydrogenase, mitochondrial OS=Mus musculus OX=10090 GN=Acadvl PE=1 SV=3	1	2.37808e-10	125.68	1	K	VGPVARFFEEVNDPAKNDALEKVEDDTLQGL	X;X;X;X;X;X;X;X;X;X;X;X;X;X;X;Acetyl (K);X;X;X;X;X;Acetyl (K);X;X;X;X;X;X;X;X;X	XXXXXXPPPPPPPPPPPPPPPPXXXXXXXXX	FFEEVNDPAK(1)NDALEK	10	2	-0.96582		5962;5963;5964;5965;5966;5967	5967	24853	35260	22575	35206	28734	34651
P50544	128	P50544	P50544	sp|P50544|ACADV_MOUSE Very long-chain specific acyl-CoA dehydrogenase, mitochondrial OS=Mus musculus OX=10090 GN=Acadvl PE=1 SV=3	1	1.03447e-84	255.66	1	K	FFEEVNDPAKNDALEKVEDDTLQGLKELGAF	X;X;X;X;X;X;X;X;X;X;X;X;X;X;X;Acetyl (K);X;X;X;X;X;X;X;X;X;X;X;X;X;X;X	XXXXXXXXXXPPPPPPPPPPPPPPPPXXXXX	NDALEK(1)VEDDTLQGLK	6	2	-0.86887		20782;20783;20784;20785;20786;20787	20787	250400	381440	394930	329850	421690	331620
P50544	196	P50544	P50544	sp|P50544|ACADV_MOUSE Very long-chain specific acyl-CoA dehydrogenase, mitochondrial OS=Mus musculus OX=10090 GN=Acadvl PE=1 SV=3	1	0.000786528	75.181	1	K	AHQSIGFKGILLYGTKAQREKYLPRVASGQA	X;X;X;X;X;X;X;X;X;X;X;X;X;X;X;Acetyl (K);X;X;X;X;X;X;X;X;X;X;X;X;X;X;X	XXXXXXXXPPPPPPPPPPPXXXXXXXXXXXX	GILLYGTK(1)AQR	8	2	-2.395		8378;8379;8380;8381	8381	144080	154420	84881	102350	0	0
P50544	383	P50544	P50544	sp|P50544|ACADV_MOUSE Very long-chain specific acyl-CoA dehydrogenase, mitochondrial OS=Mus musculus OX=10090 GN=Acadvl PE=1 SV=3	1	0.000476321	97.265	1	K	TQFGDKIHNFGVIQEKLARMAILQYVTESMA	X;X;X;X;X;X;X;X;X;X;X;X;X;X;X;Acetyl (K);X;X;X;X;X;X;X;X;X;X;X;X;X;X;X	XXXXXXPPPPPPPPPPPPPXXXXXXXXXXXX	IHNFGVIQEK(1)LAR	10	2	-1.9784		13226;13227;13228;13229;13230;13231;13232;13233;13234;13235;13236	13236	160500	139850	95912	29033	56299	51957
P50544	481	P50544	P50544	sp|P50544|ACADV_MOUSE Very long-chain specific acyl-CoA dehydrogenase, mitochondrial OS=Mus musculus OX=10090 GN=Acadvl PE=1 SV=3	1	0.00703706	43.556	1	K	NDILRLFVALQGCMDKGKELTGLGNALKNPF	X;X;X;X;X;X;X;X;X;X;X;X;X;Oxidation (M);X;Acetyl (K);X;X;X;X;X;X;X;X;X;X;X;X;X;X;X	XXXXXPPPPPPPPPPPPPXXXXXXXXXXXXX	LFVALQGCMDK(1)GK	11	2	0.66659		16213	16213	0	0	10470	0	0	0
P50544	299	P50544	P50544	sp|P50544|ACADV_MOUSE Very long-chain specific acyl-CoA dehydrogenase, mitochondrial OS=Mus musculus OX=10090 GN=Acadvl PE=1 SV=3	1	3.53222e-30	164.25	1	K	VVERSFGGVTHGLPEKKMGIKASNTSEVYFD	X;X;X;X;X;X;X;X;X;X;X;X;X;X;X;Acetyl (K);X;X;X;X;X;X;X;X;X;X;X;X;X;X;X	XXXXPPPPPPPPPPPPPXXXXXXXXXXXXXX	SFGGVTHGLPEK(1)K	12	2	-0.72212		25120;25121;25122;25123;25124;25125;25126;25127;25128;25129;25130;25131	25131	572940	482860	342410	264290	372910	355270
P50544	359	P50544	P50544	sp|P50544|ACADV_MOUSE Very long-chain specific acyl-CoA dehydrogenase, mitochondrial OS=Mus musculus OX=10090 GN=Acadvl PE=1 SV=3	1	2.90475e-05	110.7	1	K	GMAATLAGTMKSLIAKAVDHATNRTQFGDKI	X;X;X;X;X;X;X;X;X;Oxidation (M);X;X;X;X;X;Acetyl (K);X;X;X;X;X;X;X;X;X;X;X;X;X;Acetyl (K);X	XXXXXXXXXXXPPPPPPPPPPPPPXXXXXXX	SLIAK(1)AVDHATNR	5	2	1.6575		26132;26133;26134;26135;26136;26137	26137	79512	73242	61676	48487	65857	65998
P50544	240	P50544	P50544	sp|P50544|ACADV_MOUSE Very long-chain specific acyl-CoA dehydrogenase, mitochondrial OS=Mus musculus OX=10090 GN=Acadvl PE=1 SV=3	1	1.64586e-06	92.681	1	K	DVASIRSSAIPSPCGKYYTLNGSKIWISNGG	X;X;X;X;X;X;X;X;X;X;X;X;X;X;X;Acetyl (K);X;X;X;X;X;X;X;X;X;X;X;X;X;X;X	XXXXXXPPPPPPPPPPPPPPPPPPXXXXXXX	SSAIPSPCGK(1)YYTLNGSK	10	2	-1.0395		26889;26890;26891;26892;26893;26894	26894	90947	71521	84956	33503	71066	56168
P50544	373	P50544	P50544	sp|P50544|ACADV_MOUSE Very long-chain specific acyl-CoA dehydrogenase, mitochondrial OS=Mus musculus OX=10090 GN=Acadvl PE=1 SV=3	1	6.82498e-34	165.34	1	K	AKAVDHATNRTQFGDKIHNFGVIQEKLARMA	X;Acetyl (K);X;X;X;X;X;X;X;X;X;X;X;X;X;Acetyl (K);X;X;X;X;X;X;X;X;X;Acetyl (K);X;X;X;X;X	XXXXXXXXXXPPPPPPPPPPPPPPPPXXXXX	TQFGDK(1)IHNFGVIQEK	6	2	-2.0635		32794;32795;32796;32797;32798;32799;32800;32801;32802;32803;32804;32805	32805	45334	35424	23013	22467	45537	55490
P50752	266	P50752	P50752	sp|P50752|TNNT2_MOUSE Troponin T, cardiac muscle OS=Mus musculus OX=10090 GN=Tnnt2 PE=1 SV=2	1	0.0029944	55.115	1	K	QSIHNLEAEKFDLQEKFKQQKYEINVLRNRI	X;X;X;X;X;X;X;X;X;X;X;X;X;X;X;Acetyl (K);X;X;X;X;Acetyl (K);X;X;X;X;X;X;X;X;X;X	XXXXXXXXXXPPPPPPPPXXXXXXXXXXXXX	FDLQEK(1)FK	6	2	0.11222		5841	5841	32677	0	0	0	0	0
P50752	271	P50752	P50752	sp|P50752|TNNT2_MOUSE Troponin T, cardiac muscle OS=Mus musculus OX=10090 GN=Tnnt2 PE=1 SV=2	1	0.00206589	61.885	1	K	LEAEKFDLQEKFKQQKYEINVLRNRINDNQK	X;X;X;X;X;X;X;X;X;X;Acetyl (K);X;X;X;X;Acetyl (K);X;X;X;X;X;X;X;X;X;X;X;X;X;X;X	XXXXXXXXXXXXXPPPPPPPPPPXXXXXXXX	QQK(1)YEINVLR	3	2	-1.501		23849;23850;23851;23852	23852	94328	30269	0	11344	24972	0
P51125	173	P51125	P51125	sp|P51125|ICAL_MOUSE Calpastatin OS=Mus musculus OX=10090 GN=Cast PE=1 SV=2	1	5.44182e-16	177.19	1	K	KEKALSRSNEQMVSEKPSESKTKFQDVPSAG	X;X;X;X;X;X;X;X;X;X;X;X;X;X;X;Acetyl (K);X;X;X;X;X;X;X;X;X;X;X;X;X;X;X	XXXXXXXPPPPPPPPPPPPPPXXXXXXXXXX	SNEQMVSEK(1)PSESK	9	2	1.3669		26497;26498;26499	26499	0	7572.2	10969	0	5909.5	0
P51174	322	P51174	P51174	sp|P51174|ACADL_MOUSE Long-chain specific acyl-CoA dehydrogenase, mitochondrial OS=Mus musculus OX=10090 GN=Acadl PE=1 SV=2	1	4.63085e-07	154.69	1	K	FEETRNYVKQRKAFGKTVAHIQTVQHKLAEL	X;X;X;X;X;X;X;X;X;X;X;X;X;X;X;Acetyl (K);X;X;X;X;X;X;X;X;X;X;Acetyl (K);X;X;X;X	XXXXXXXXXXXXPPPPPPPPPPPPPPPXXXX	AFGK(1)TVAHIQTVQHK	4	2	-1.4653		754;755;756;757;758;759;760;761;762;763;764;765	765	103560	112090	86157	110360	106010	106460
P51174	333	P51174	P51174	sp|P51174|ACADL_MOUSE Long-chain specific acyl-CoA dehydrogenase, mitochondrial OS=Mus musculus OX=10090 GN=Acadl PE=1 SV=2	1	4.11275e-10	98.933	1	K	KAFGKTVAHIQTVQHKLAELKTHICVTRAFV	X;X;X;X;X;X;X;X;X;X;X;X;X;X;X;Acetyl (K);X;X;X;X;Acetyl (K);X;X;X;X;X;X;X;X;X;X	XXXXXPPPPPPPPPPPPPPPPXXXXXXXXXX	TVAHIQTVQHK(1)LAELK	11	2	1.1919		33965;33966;33967;33968;33969;33970	33970	64816	68484	93128	41906	58493	46278
P51174	358	P51174	P51174	sp|P51174|ACADL_MOUSE Long-chain specific acyl-CoA dehydrogenase, mitochondrial OS=Mus musculus OX=10090 GN=Acadl PE=1 SV=2	1	5.63267e-16	179.48	1	K	VTRAFVDSCLQLHETKRLDSGSASMAKYWAS	X;X;X;X;X;X;X;X;X;X;X;X;X;X;X;Acetyl (K);X;X;X;X;X;X;X;X;X;X;X;X;X;X;X	XXXPPPPPPPPPPPPPPXXXXXXXXXXXXXX	AFVDSCLQLHETK(1)R	13	2	0.6717		828;829;830;831;832;833	833	490730	583890	640110	398790	481560	517080
P51174	95	P51174	P51174	sp|P51174|ACADL_MOUSE Long-chain specific acyl-CoA dehydrogenase, mitochondrial OS=Mus musculus OX=10090 GN=Acadl PE=1 SV=2	1	0.00182874	88.233	1	K	EKAGEVSREVWEKAGKQGLLGINIAEKHGGI	X;Acetyl (K);X;X;X;X;X;X;X;X;X;X;X;X;X;Acetyl (K);X;X;X;X;X;X;X;X;X;X;X;X;X;X;X	XXXXXXXXXXXXXPPPPPPPPPPPPPPXXXX	AGK(1)QGLLGINIAEK	3	2	-0.96849		960;961	961	0	17323	0	0	0	9084.9
P51174	156	P51174	P51174	sp|P51174|ACADL_MOUSE Long-chain specific acyl-CoA dehydrogenase, mitochondrial OS=Mus musculus OX=10090 GN=Acadl PE=1 SV=2	1	3.43615e-11	135.01	1	K	VMPYIANYGTKEQIEKFIPQMTAGKCIGAIA	X;X;X;X;X;X;X;X;X;X;X;X;X;X;X;Acetyl (K);X;X;X;X;Oxidation (M);X;X;X;X;X;X;X;X;X;X	XXXXXXXXXXXPPPPPPPPPPPPPPXXXXXX	EQIEK(1)FIPQMTAGK	5	2	-3.3521		5298;5299;5300;5301;5302;5303;5304;5305;5306;5307;5308;5309;5310;5311;5312;5313	5313	1288900	1024700	1514000	859940	1098500	1065200
P51174	81	P51174	P51174	sp|P51174|ACADL_MOUSE Long-chain specific acyl-CoA dehydrogenase, mitochondrial OS=Mus musculus OX=10090 GN=Acadl PE=1 SV=2	1	7.12459e-87	264.9	1	K	KFFQEEVIPHHTEWEKAGEVSREVWEKAGKQ	X;X;X;X;X;X;X;X;X;X;X;X;X;X;X;Acetyl (K);X;X;X;X;X;X;X;X;X;X;X;X;X;Acetyl (K);X	PPPPPPPPPPPPPPPPPPPPPPXXXXXXXXX	FFQEEVIPHHTEWEK(1)AGEVSR	15	3	-0.59584		6031;6032;6033;6034;6035;6036;6037;6038;6039;6040;6041;6042;6043;6044;6045;6046;14899;14900;14901;14902;14903;14904;14905	6046	2188200	2329800	2792200	2128300	2385400	2263800
P51174	66	P51174	P51174	sp|P51174|ACADL_MOUSE Long-chain specific acyl-CoA dehydrogenase, mitochondrial OS=Mus musculus OX=10090 GN=Acadl PE=1 SV=2	1	8.21603e-20	201.06	1	K	RIFSSEHDIFRESVRKFFQEEVIPHHTEWEK	X;X;X;X;X;X;X;X;X;X;X;X;X;X;X;Acetyl (K);X;X;X;X;X;X;X;X;X;X;X;X;X;X;Acetyl (K)	XXXXXXXXXXXXXXXPPPPPPPPPPPPPPPP	K(1)FFQEEVIPHHTEWEK	1	2	0.90722		14887;14888;14889;14890;14891;14892;14893;14894;14895;14896;14897;14898	14898	249110	326580	377050	373550	386580	334670
P51174	338	P51174	P51174	sp|P51174|ACADL_MOUSE Long-chain specific acyl-CoA dehydrogenase, mitochondrial OS=Mus musculus OX=10090 GN=Acadl PE=1 SV=2	1	0.00430746	36.602	1	K	TVAHIQTVQHKLAELKTHICVTRAFVDSCLQ	X;X;X;X;X;X;X;X;X;X;X;X;X;X;X;Acetyl (K);X;X;X;X;X;X;X;X;X;X;X;X;X;X;X	XXXXXXXXXXXPPPPPPPPPPPPXXXXXXXX	LAELK(1)THICVTR	5	2	0.4271		15360	15360	0	0	3140.4	0	0	0
P51174	254	P51174	P51174	sp|P51174|ACADL_MOUSE Long-chain specific acyl-CoA dehydrogenase, mitochondrial OS=Mus musculus OX=10090 GN=Acadl PE=1 SV=2	1	2.19524e-14	99.514	1	K	MKGFIKGRKLHKMGMKAQDTAELFFEDVRLP	Oxidation (M);X;X;X;X;X;X;X;X;X;X;X;Oxidation (M);X;Oxidation (M);Acetyl (K);X;X;X;X;X;X;X;X;X;X;X;X;X;X;X	XXXXXXXXXXXXPPPPPPPPPPPPPPPPPXX	MGMK(1)AQDTAELFFEDVR	4	2	-2.8647		19870;19871;19872;19873;19874;19875;19876;19877;19878;19879;19880;19881;19882	19882	4064.7	59916	88081	29350	28389	15906
P51174	419	P51174	P51174	sp|P51174|ACADL_MOUSE Long-chain specific acyl-CoA dehydrogenase, mitochondrial OS=Mus musculus OX=10090 GN=Acadl PE=1 SV=2	1	9.19296e-05	52.732	1	K	DARVQPIYGGTNEIMKELIARQIVSDS____	X;X;X;X;X;X;X;X;X;X;X;X;X;X;Oxidation (M);Acetyl (K);X;X;X;X;X;X;X;X;X;X;X;X;X;X;X	XXXPPPPPPPPPPPPPPPPPPXXXXXXXXXX	VQPIYGGTNEIMK(1)ELIAR	13	2	-1.0966		37436	37436	0	0	14183	0	0	0
P51660	139	P51660	P51660	sp|P51660|DHB4_MOUSE Peroxisomal multifunctional enzyme type 2 OS=Mus musculus OX=10090 GN=Hsd17b4 PE=1 SV=3	1	0.041236	71.231	1	K	LRGSFQVTRAAWDHMKKQNYGRILMTSSASG	X;X;X;X;X;X;X;X;X;X;X;X;X;X;X;Acetyl (K);X;X;X;X;X;X;X;X;X;X;X;X;X;X;X	XXXXXXXXXPPPPPPPPXXXXXXXXXXXXXX	AAWDHMK(1)K	7	2	-0.54945		326;327	327	0	23305	19246	0	0	0
P51660	81	P51660	P51660	sp|P51660|DHB4_MOUSE Peroxisomal multifunctional enzyme type 2 OS=Mus musculus OX=10090 GN=Hsd17b4 PE=1 SV=3	1	1.41977e-09	129.06	1	K	GGKAVANYDSVEAGEKLVKTALDTFGRIDVV	X;X;X;X;X;X;X;X;X;X;X;X;X;X;X;Acetyl (K);X;X;X;X;X;X;X;X;X;X;X;X;X;X;X	XXXPPPPPPPPPPPPPPPPXXXXXXXXXXXX	AVANYDSVEAGEK(1)LVK	13	2	-9.1061		2605;2606;2607;2608	2608	30383	0	25387	25831	50265	0
P51660	57	P51660	P51660	sp|P51660|DHB4_MOUSE Peroxisomal multifunctional enzyme type 2 OS=Mus musculus OX=10090 GN=Hsd17b4 PE=1 SV=3	1	2.28907e-06	138.39	1	K	GGDFKGIGKGSSAADKVVAEIRRKGGKAVAN	X;X;X;X;X;X;X;X;X;X;X;X;X;X;X;Acetyl (K);X;X;X;X;X;X;X;X;X;X;X;X;X;X;X	XXXXXXXXXPPPPPPPPPPPPPXXXXXXXXX	GSSAADK(1)VVAEIR	7	2	3.1884		9308;9309;9310;9311;9312;9313	9313	95719	56883	71751	68430	81021	67775
P51667	115	P51667	P51667	sp|P51667|MLRV_MOUSE Myosin regulatory light chain 2, ventricular/cardiac muscle isoform OS=Mus musculus OX=10090 GN=Myl2 PE=1 SV=3	1	0.00259613	65.731	1	K	LNAFKVFDPEGKGSLKADYVREMLTTQAERF	X;X;X;X;X;X;X;X;X;X;X;X;X;X;X;Acetyl (K);X;X;X;X;X;X;X;X;X;X;X;X;X;X;X	XXXXXXXXXXXXPPPPPPPPPXXXXXXXXXX	GSLK(1)ADYVR	4	2	-0.24333		9267;9268;9269;9270;9271	9271	107180	60582	87977	18220	75195	0
P51667	165	P51667	P51667	sp|P51667|MLRV_MOUSE Myosin regulatory light chain 2, ventricular/cardiac muscle isoform OS=Mus musculus OX=10090 GN=Myl2 PE=1 SV=3	1	2.30576e-41	237.37	1	K	LDYKNLVHIITHGEEKD______________	X;X;X;X;X;X;X;X;X;X;X;X;X;X;X;Acetyl (K);X;X;X;X;X;X;X;X;X;X;X;X;X;X;X	XXXXPPPPPPPPPPPPPXXXXXXXXXXXXXX	NLVHIITHGEEK(1)D	12	2	-1.2247		21320;21321;21322;21323;21324;21325	21325	765110	241680	617890	139430	503330	95458
P51667	62	P51667	P51667	sp|P51667|MLRV_MOUSE Myosin regulatory light chain 2, ventricular/cardiac muscle isoform OS=Mus musculus OX=10090 GN=Myl2 PE=1 SV=3	1	4.24324e-22	150.56	1	K	NDLRDTFAALGRVNVKNEEIDEMIKEAPGPI	X;X;X;X;X;X;X;X;X;X;X;X;X;X;X;Acetyl (K);X;X;X;X;X;X;Oxidation (M);X;X;X;X;X;X;X;X	XXXXXXXXXXXXPPPPPPPPPPPPPXXXXXX	VNVK(1)NEEIDEMIK	4	2	-3.3219		37299;37300;37301;37302;37303;37304;37305	37305	301500	148110	182780	82279	161790	40331
P51881	272	P51881	P51881	sp|P51881|ADT2_MOUSE ADP/ATP translocase 2 OS=Mus musculus OX=10090 GN=Slc25a5 PE=1 SV=3	1	0.000116093	143.99	1	K	CWRKIARDEGSKAFFKGAWSNVLRGMGGAFV	X;X;X;X;X;X;X;X;X;X;X;X;X;X;X;Acetyl (K);X;X;X;X;X;X;X;X;X;Oxidation (M);X;X;X;X;X	XXXXXXXXXXXXPPPPPPPPPPPPXXXXXXX	AFFK(1)GAWSNVLR	4	2	-1.9907		741;742;743;744;745;746	746	181170	195370	169790	124340	242340	197950
P51881	163	P51881	P51881	sp|P51881|ADT2_MOUSE ADP/ATP translocase 2 OS=Mus musculus OX=10090 GN=Slc25a5 PE=1 SV=3	1	0.00013115	131.13	1	K	AGAEREFKGLGDCLVKIYKSDGIKGLYQGFN	X;X;X;X;X;X;X;X;X;X;X;X;X;X;X;Acetyl (K);X;X;Acetyl (K);X;X;X;X;X;X;X;X;X;X;X;X	XXXXXXXXPPPPPPPPPPPXXXXXXXXXXXX	GLGDCLVK(1)IYK	8	2	-1.5897		8701;8702;8703;8704;8705;8706	8706	618300	411060	535950	435710	518810	485220
P51881	166	P51881	P51881	sp|P51881|ADT2_MOUSE ADP/ATP translocase 2 OS=Mus musculus OX=10090 GN=Slc25a5 PE=1 SV=3	1	0.0248415	7.0971	1	K	EREFKGLGDCLVKIYKSDGIKGLYQGFNVSV	X;X;X;X;X;X;X;X;X;X;X;X;X;X;X;Acetyl (K);X;X;X;X;X;X;X;X;X;X;X;X;X;X;X	XXXXXXXXXXXXXPPPPPPPPXXXXXXXXXX	IYK(1)SDGIK	3	2	-3.413		14741	14741	0	0	0	0	10533	0
P51881	147	P51881	P51881	sp|P51881|ADT2_MOUSE ADP/ATP translocase 2 OS=Mus musculus OX=10090 GN=Slc25a5 PE=1 SV=3	1	0.000526088	91.934	1	K	YPLDFARTRLAADVGKAGAEREFKGLGDCLV	X;X;X;X;X;X;X;X;X;X;X;X;X;X;X;Acetyl (K);X;X;X;X;X;X;X;X;X;X;X;X;X;X;X	XXXXXXXXXPPPPPPPPPPPPXXXXXXXXXX	LAADVGK(1)AGAER	7	2	-0.72752		15312;15313;15314;15315;15316	15316	39782	33205	0	24197	31258	16980
P51881	43	P51881	P51881	sp|P51881|ADT2_MOUSE ADP/ATP translocase 2 OS=Mus musculus OX=10090 GN=Slc25a5 PE=1 SV=3	1	1.46792e-09	25.221	1	K	PIERVKLLLQVQHASKQITADKQYKGIIDCV	X;X;X;X;X;X;X;X;X;X;X;X;X;X;X;Acetyl (K);X;X;X;X;X;X;X;X;X;X;X;X;X;X;X	XXXXXXPPPPPPPPPPPPPPPPXXXXXXXXX	LLLQVQHASK(1)QITADK	10	2	-1.8144		17699;17700;17701;17702	17702	12462	13304	8613.9	0	5045.5	0
P51881	105	P51881	P51881	sp|P51881|ADT2_MOUSE ADP/ATP translocase 2 OS=Mus musculus OX=10090 GN=Slc25a5 PE=1 SV=3	1	1.52012e-24	156.92	1	K	AFKDKYKQIFLGGVDKRTQFWRYFAGNLASG	X;X;Acetyl (K);X;X;X;X;X;X;X;X;X;X;X;X;Acetyl (K);X;X;X;X;X;X;X;X;X;X;X;X;X;X;X	XXXXXXXPPPPPPPPPPXXXXXXXXXXXXXX	QIFLGGVDK(1)R	9	2	0.71948		23512;23513;23514;23515;23516;23517	23517	530540	303370	566980	323890	516400	307630
P52196	14	P52196	P52196	sp|P52196|THTR_MOUSE Thiosulfate sulfurtransferase OS=Mus musculus OX=10090 GN=Tst PE=1 SV=3	1	1.60127e-30	186.81	1	K	__MVHQVLYRALVSTKWLAESIRSGRLGPSL	X;X;X;X;X;X;X;X;X;X;X;X;X;X;X;Acetyl (K);X;X;X;X;X;X;X;X;X;X;X;X;X;X;X	XXXXXXXXXXPPPPPPPPPPPPPXXXXXXXX	ALVSTK(1)WLAESIR	6	2	-3.1789		1765;1766;1767;1768;1769;1770	1770	313210	398870	459130	268750	457070	449150
P52480	188	P52480	P52480	sp|P52480|KPYM_MOUSE Pyruvate kinase PKM OS=Mus musculus OX=10090 GN=Pkm PE=1 SV=4	1	7.56348e-22	120.88	1	K	KIYVDDGLISLQVKEKGADFLVTEVENGGSL	X;X;X;X;X;X;X;X;X;X;X;X;X;X;X;Acetyl (K);X;X;X;X;X;X;X;X;X;X;X;X;X;X;X	XXXXXXXXXXXXXXPPPPPPPPPPPPPPPPP	EK(1)GADFLVTEVENGGSLGSK	2	2	-0.29538		4917;4918;4919;4920;4921;4922	4922	12002	29787	32392	14092	20021	7841
P52480	206	P52480	P52480	sp|P52480|KPYM_MOUSE Pyruvate kinase PKM OS=Mus musculus OX=10090 GN=Pkm PE=1 SV=4	1	1.53479e-24	142.6	1	K	DFLVTEVENGGSLGSKKGVNLPGAAVDLPAV	X;X;X;X;X;X;X;X;X;X;X;X;X;X;X;Acetyl (K);X;X;X;X;X;X;X;X;X;X;X;X;X;X;X	PPPPPPPPPPPPPPPPPXXXXXXXXXXXXXX	GADFLVTEVENGGSLGSK(1)K	18	2	-1.465		7421;7422;7423;7424;7425;7426	7426	37726	58834	36569	35283	38030	29024
P52480;P53657	305;348	P52480	P52480	sp|P52480|KPYM_MOUSE Pyruvate kinase PKM OS=Mus musculus OX=10090 GN=Pkm PE=1 SV=4;sp|P53657|KPYR_MOUSE Pyruvate kinase PKLR OS=Mus musculus OX=10090 GN=Pklr PE=1 SV=1	1	3.16141e-06	123.45	1	K	IMVARGDLGIEIPAEKVFLAQKMMIGRCNRA	X;X;X;X;X;X;X;X;X;X;X;X;X;X;X;Acetyl (K);X;X;X;X;X;X;X;X;X;X;X;X;X;X;X	XXXXXPPPPPPPPPPPPPPPPPXXXXXXXXX	GDLGIEIPAEK(1)VFLAQK	11	2	-2.4535		7662;7663;7664	7664	9476	14906	20557	0	0	0
P52480	135	P52480	P52480	sp|P52480|KPYM_MOUSE Pyruvate kinase PKM OS=Mus musculus OX=10090 GN=Pkm PE=1 SV=4	1	3.85364e-06	121.39	1	K	RTGLIKGSGTAEVELKKGATLKITLDNAYME	X;X;X;X;X;X;X;X;X;X;X;X;X;X;X;Acetyl (K);X;X;X;X;X;X;X;X;X;X;X;X;X;X;X	XXXXXXPPPPPPPPPPPXXXXXXXXXXXXXX	GSGTAEVELK(1)K	10	2	0.73309		9235;9236;9237;9238;9239;9240	9240	152430	115260	121540	93660	100220	79335
P52480	89	P52480	P52480	sp|P52480|KPYM_MOUSE Pyruvate kinase PKM OS=Mus musculus OX=10090 GN=Pkm PE=1 SV=4	1	0.000679079	37.49	1	K	LNFSHGTHEYHAETIKNVREATESFASDPIL	X;X;X;X;X;X;X;X;X;X;X;X;X;X;X;Acetyl (K);X;X;X;X;X;X;X;X;X;X;X;X;X;X;X	PPPPPPPPPPPPPPPPPPPXXXXXXXXXXXX	LNFSHGTHEYHAETIK(1)NVR	16	3	-2.054		18019;18020;18021	18021	0	31820	30063	0	0	15233
P52480	62	P52480	P52480	sp|P52480|KPYM_MOUSE Pyruvate kinase PKM OS=Mus musculus OX=10090 GN=Pkm PE=1 SV=4	1	0.02986	40.62	1	K	IICTIGPASRSVEMLKEMIKSGMNVARLNFS	X;X;X;X;X;X;X;X;X;X;X;X;X;X;X;Acetyl (K);X;X;X;X;X;X;X;X;X;X;X;X;X;X;X	XXXXXXXXXXPPPPPPPPPPXXXXXXXXXXX	SVEMLK(1)EMIK	6	2	-2.4164		27434;27435	27435	0	51517	0	0	23367	0
P52503	41	P52503	P52503	sp|P52503|NDUS6_MOUSE NADH dehydrogenase [ubiquinone] iron-sulfur protein 6, mitochondrial OS=Mus musculus OX=10090 GN=Ndufs6 PE=1 SV=2	1	8.27878e-23	148.05	1	K	PSGEKITHTGQVYDEKDYRRVRFVDRQKEVN	X;X;X;X;X;X;X;X;X;X;X;X;X;X;X;Acetyl (K);X;X;X;X;X;X;X;X;X;X;X;X;X;X;X	XXXXXPPPPPPPPPPPPPPXXXXXXXXXXXX	ITHTGQVYDEK(1)DYR	11	2	-0.99362		14332;14333;14334;14335;14336;14337;14338;14339;14340;14341;14342;14343	14343	71666	37320	46239	34976	51120	37720
P52503	112	P52503	P52503	sp|P52503|NDUS6_MOUSE NADH dehydrogenase [ubiquinone] iron-sulfur protein 6, mitochondrial OS=Mus musculus OX=10090 GN=Ndufs6 PE=1 SV=2	1	4.57425e-21	226.03	1	K	KETKTGTCGYCGLQFKQHHH___________	Acetyl (K);X;X;X;X;X;X;X;X;X;X;X;X;X;X;Acetyl (K);X;X;X;X;X;X;X;X;X;X;X;X;X;X;X	XXXXPPPPPPPPPPPPPPPPXXXXXXXXXXX	TGTCGYCGLQFK(1)QHHH	12	2	-1.0191		30132;30133;30134;30135;30136;30137;30138;30139;30140;30141;30142;30143	30143	185770	145620	214240	123990	207790	175480
P52503	97	P52503	P52503	sp|P52503|NDUS6_MOUSE NADH dehydrogenase [ubiquinone] iron-sulfur protein 6, mitochondrial OS=Mus musculus OX=10090 GN=Ndufs6 PE=1 SV=2	1	0.000487638	81.696	1	K	GGGALGHPKVYINLDKETKTGTCGYCGLQFK	X;X;X;X;X;X;X;X;X;X;X;X;X;X;X;Acetyl (K);X;X;X;X;X;X;X;X;X;X;X;X;X;X;Acetyl (K)	XXXXXXXXXPPPPPPPPPPXXXXXXXXXXXX	VYINLDK(1)ETK	7	2	0.85723		38220;38221;38222;38223;38224;38225	38225	112590	80415	68810	46116	73331	55130
P52825	414	P52825	P52825	sp|P52825|CPT2_MOUSE Carnitine O-palmitoyltransferase 2, mitochondrial OS=Mus musculus OX=10090 GN=Cpt2 PE=1 SV=2	1	3.42269e-40	131.71	1	K	PQSQPAATDSSVSVQKLSFKLSSALKAGVTA	X;X;X;X;X;X;X;X;X;X;X;X;X;X;X;Acetyl (K);X;X;X;Acetyl (K);X;X;X;X;X;Acetyl (K);X;X;X;X;X	PPPPPPPPPPPPPPPPPPPPXXXXXXXXXXX	DSTQTPAIAPQSQPAATDSSVSVQK(1)LSFK	25	3	-1.9339		4106;4107;4108;4109;4110;4111;4112	4112	57999	144870	206630	27344	54272	47504
P52825	418	P52825	P52825	sp|P52825|CPT2_MOUSE Carnitine O-palmitoyltransferase 2, mitochondrial OS=Mus musculus OX=10090 GN=Cpt2 PE=1 SV=2	1	0.00131366	85.697	1	K	PAATDSSVSVQKLSFKLSSALKAGVTAAKEK	X;X;X;X;X;X;X;X;X;X;X;X;X;X;X;Acetyl (K);X;X;X;X;X;Acetyl (K);X;X;X;X;X;X;X;X;X	XXXXXXXXXXXXPPPPPPPPPPXXXXXXXXX	LSFK(1)LSSALK	4	2	-2.8671		18499;18500;18501;18502;18503;18504	18504	241120	246690	382880	190860	326920	301880
P52825	104	P52825	P52825	sp|P52825|CPT2_MOUSE Carnitine O-palmitoyltransferase 2, mitochondrial OS=Mus musculus OX=10090 GN=Cpt2 PE=1 SV=2	1	8.67956e-12	123.13	1	K	NGIGKELHAHLLAQDKQNKHTSYISGPWFDM	X;X;X;X;X;X;X;X;X;X;X;X;X;X;X;Acetyl (K);X;X;X;X;X;X;X;X;X;X;X;X;X;X;X	XXXXXPPPPPPPPPPPPPPXXXXXXXXXXXX	ELHAHLLAQDK(1)QNK	11	2	-0.053805		5074;5075;5076;5077	5077	10341	9266.2	0	0	0	0
P52825	62	P52825	P52825	sp|P52825|CPT2_MOUSE Carnitine O-palmitoyltransferase 2, mitochondrial OS=Mus musculus OX=10090 GN=Cpt2 PE=1 SV=2	1	0.00496308	45.841	1	K	DSLPRLPIPKLEDTMKRYLSAQKPLLNDSQF	X;X;X;X;X;X;X;X;X;X;X;X;X;X;X;Acetyl (K);X;X;X;X;X;X;Acetyl (K);X;X;X;X;X;X;X;X	XXXXXXXXXXPPPPPPPXXXXXXXXXXXXXX	LEDTMK(1)R	6	2	-1.4117		15843;15844;15845	15845	73869	0	0	0	39548	30411
P52825	56	P52825	P52825	sp|P52825|CPT2_MOUSE Carnitine O-palmitoyltransferase 2, mitochondrial OS=Mus musculus OX=10090 GN=Cpt2 PE=1 SV=2	1	0.00529015	55.244	1	K	PTMHYQDSLPRLPIPKLEDTMKRYLSAQKPL	X;X;X;X;X;X;X;X;X;X;X;X;X;X;X;Acetyl (K);X;X;X;X;X;Acetyl (K);X;X;X;X;X;X;Acetyl (K);X;X	XXXXXXXXXXXPPPPPPPPPPPXXXXXXXXX	LPIPK(1)LEDTMK	5	2	-0.57068		18220;18221;18222;18223	18223	165840	0	0	63661	113650	97417
P52825	424	P52825	P52825	sp|P52825|CPT2_MOUSE Carnitine O-palmitoyltransferase 2, mitochondrial OS=Mus musculus OX=10090 GN=Cpt2 PE=1 SV=2	1	5.91245e-11	115.57	1	K	SVSVQKLSFKLSSALKAGVTAAKEKFDATMK	X;X;X;X;X;Acetyl (K);X;X;X;X;X;X;X;X;X;Acetyl (K);X;X;X;X;X;X;X;X;X;X;X;X;X;X;X	XXXXXXXXXXPPPPPPPPPPPPPXXXXXXXX	LSSALK(1)AGVTAAK	6	2	0.39531		18642;18643;18644;18645;18646;18647;18648;18649	18649	2448200	2402900	2527400	1951200	2723000	2710200
P52825	510	P52825	P52825	sp|P52825|CPT2_MOUSE Carnitine O-palmitoyltransferase 2, mitochondrial OS=Mus musculus OX=10090 GN=Cpt2 PE=1 SV=2	1	2.76853e-10	124.66	1	K	KHGRTETIRPASIFTKRCSEAFVREPSKHSV	X;X;X;X;X;X;X;X;X;X;X;X;X;X;X;Acetyl (K);X;X;X;X;X;X;X;X;X;X;X;X;X;X;X	XXXXXXXXXPPPPPPPPXXXXXXXXXXXXXX	PASIFTK(1)R	7	2	-0.77913		21956;21957;21958;21959;21960;21961	21961	187710	194340	136670	101050	148900	144630
P52825	305	P52825	P52825	sp|P52825|CPT2_MOUSE Carnitine O-palmitoyltransferase 2, mitochondrial OS=Mus musculus OX=10090 GN=Cpt2 PE=1 SV=2	1	1.72859e-41	227.26	1	K	YLTSENRDVWAELRQKLIHGGNEETLRKVDS	X;X;X;X;X;X;X;X;X;X;X;X;X;X;X;Acetyl (K);X;X;X;X;X;X;X;X;X;X;X;X;X;X;X	XXXXXXXXXXXXXXPPPPPPPPPPPPPXXXX	QK(1)LIHGGNEETLR	2	2	0.62697		23635;23636;23637;23638;23639;23640;23641;23642;23643;23644;23645;23646	23646	238640	262190	372670	377500	466450	415300
P52825	189	P52825	P52825	sp|P52825|CPT2_MOUSE Carnitine O-palmitoyltransferase 2, mitochondrial OS=Mus musculus OX=10090 GN=Cpt2 PE=1 SV=2	1	0.0258919	85.913	1	K	EVFHLNPARSDTDAFKRLIRFVPSSLSWYGA	X;X;X;X;X;X;X;X;X;X;X;X;X;X;X;Acetyl (K);X;X;X;X;X;X;X;X;X;X;X;X;X;X;X	XXXXXXXXXPPPPPPPPXXXXXXXXXXXXXX	SDTDAFK(1)R	7	2	-1.8446		24759	24759	5083.7	0	0	0	0	0
P52825	85	P52825	P52825	sp|P52825|CPT2_MOUSE Carnitine O-palmitoyltransferase 2, mitochondrial OS=Mus musculus OX=10090 GN=Cpt2 PE=1 SV=2	1	0.0122515	71.754	1	K	PLLNDSQFRKTEVLCKDFENGIGKELHAHLL	X;X;X;X;X;X;X;X;X;X;X;X;X;X;X;Acetyl (K);X;X;X;X;X;X;X;X;X;X;X;X;X;X;X	XXXXXXXXXXPPPPPPPPPPPPPPXXXXXXX	TEVLCK(1)DFENGIGK	6	2	1.1481		29147	29147	0	0	0	0	0	5057.7
P52825	544	P52825	P52825	sp|P52825|CPT2_MOUSE Carnitine O-palmitoyltransferase 2, mitochondrial OS=Mus musculus OX=10090 GN=Cpt2 PE=1 SV=2	1	2.50612e-05	81.187	1	K	QHMMAECSKYHGQLTKEAAMGQGFDRHLFAL	X;X;X;X;X;X;X;X;X;X;X;X;X;X;X;Acetyl (K);X;X;X;X;X;X;X;X;X;X;X;X;X;X;X	XXXXXXXXXPPPPPPPPPPPPPPPPPXXXXX	YHGQLTK(1)EAAMGQGFDR	7	2	-1.4803		39349;39350	39350	0	13533	0	0	3751.8	0
P52825	69	P52825	P52825	sp|P52825|CPT2_MOUSE Carnitine O-palmitoyltransferase 2, mitochondrial OS=Mus musculus OX=10090 GN=Cpt2 PE=1 SV=2	1	1.75467e-23	202.12	1	K	IPKLEDTMKRYLSAQKPLLNDSQFRKTEVLC	X;X;Acetyl (K);X;X;X;X;X;Acetyl (K);X;X;X;X;X;X;Acetyl (K);X;X;X;X;X;X;X;X;X;X;X;X;X;X;X	XXXXXXXXXXPPPPPPPPPPPPPPPXXXXXX	YLSAQK(1)PLLNDSQFR	6	2	0.53362		39590;39591;39592;39593;39594;39595	39595	229730	281060	261270	264280	293000	312450
P52840	102	P52840	P52840	sp|P52840|ST1A1_MOUSE Sulfotransferase 1A1 OS=Mus musculus OX=10090 GN=Sult1a1 PE=1 SV=1	1	1.52074e-25	150.28	1	K	PGLETLKETPAPRIIKTHLPLSLLPQSLLDQ	X;X;X;X;X;X;X;X;X;X;X;X;X;X;X;Acetyl (K);X;X;X;X;X;X;X;X;X;X;X;X;X;X;X	XXXXXXXXXXXXXPPPPPPPPPPPPPPPPPP	IIK(1)THLPLSLLPQSLLDQK	3	2	0.22478		13390;13391;13392;13393;13394;13395;13396;13397;13398	13398	160830	10390	369160	0	689460	84348
P53395	440	P53395	P53395	sp|P53395|ODB2_MOUSE Lipoamide acyltransferase component of branched-chain alpha-keto acid dehydrogenase complex, mitochondrial OS=Mus musculus OX=10090 GN=Dbt PE=1 SV=2	1	4.4699e-09	92.586	1	K	AIKALPRFDQKGDVYKAQIMNVSWSADHRVI	X;X;X;X;X;X;X;X;X;X;X;X;X;X;X;Acetyl (K);X;X;X;X;X;X;X;X;X;X;X;X;X;X;X	XXXXXXXXXXXPPPPPPPPPPPPPPPPPPXX	GDVYK(1)AQIMNVSWSADHR	5	2	-1.4665		7705;7706;7707;7708;7709;7710	7710	28389	37300	71020	30645	49456	50132
P53395	243	P53395	P53395	sp|P53395|ODB2_MOUSE Lipoamide acyltransferase component of branched-chain alpha-keto acid dehydrogenase complex, mitochondrial OS=Mus musculus OX=10090 GN=Dbt PE=1 SV=2	1	2.5572e-06	96.783	1	K	PPPQPKDRTFPTPIAKPPVFTGKDRTEPVTG	X;X;X;X;X;X;X;X;X;X;X;X;X;X;X;Acetyl (K);X;X;X;X;X;X;X;X;X;X;X;X;X;X;X	XXXXXXXXPPPPPPPPPPPPPPPXXXXXXXX	TFPTPIAK(1)PPVFTGK	8	2	-0.69536		29529;29530;29531	29531	0	79458	0	48665	79510	0
P53702	171	P53702	P53702	sp|P53702|CCHL_MOUSE Holocytochrome c-type synthase OS=Mus musculus OX=10090 GN=Hccs PE=1 SV=2	1	3.96552e-13	76.8	1	K	RIHNQNNEQAWKEILKWEALHAHECPCGPSL	X;X;X;X;X;X;X;X;X;X;X;X;X;X;X;Acetyl (K);X;X;X;X;X;X;X;X;X;X;X;X;X;X;X	XXXXXXXXXXXXPPPPPPPPPPPPPPPPPPP	EILK(1)WEALHAHECPCGPSLVR	4	3	-0.25024		4877;4878;4879	4879	16483	0	38449	0	35680	0
P53986	235	P53986	P53986	sp|P53986|MOT1_MOUSE Monocarboxylate transporter 1 OS=Mus musculus OX=10090 GN=Slc16a1 PE=1 SV=1	1	0.000555112	75.836	1	K	SDANTDLIGGSPKGEKLSVFQTINKFLDLSL	X;X;X;X;X;X;X;X;X;X;X;X;X;X;X;Acetyl (K);X;X;X;X;X;X;X;X;X;X;X;X;X;X;X	XXXXXXXXXXXXXPPPPPPPPPPPPXXXXXX	GEK(1)LSVFQTINK	3	2	-2.6729		7768;7769;7770	7770	0	44836	28984	0	29913	0
P53986	204	P53986	P53986	sp|P53986|MOT1_MOUSE Monocarboxylate transporter 1 OS=Mus musculus OX=10090 GN=Slc16a1 PE=1 SV=1	1	0.00786223	39.571	1	K	CVAGSLMRPIGPEQVKLEKLKSKESLQEAGK	X;X;X;X;X;X;X;X;X;X;X;X;X;X;X;Acetyl (K);X;X;X;X;X;X;X;X;X;X;X;X;X;X;X	XXXXXXXXPPPPPPPPPPPXXXXXXXXXXXX	PIGPEQVK(1)LEK	8	2	-0.77662		22305	22305	14753	0	0	0	0	0
P54071	193	P54071	P54071	sp|P54071|IDHP_MOUSE Isocitrate dehydrogenase [NADP], mitochondrial OS=Mus musculus OX=10090 GN=Idh2 PE=1 SV=3	1	6.09671e-05	131.91	1	K	QYKATDFVVDRAGTFKLVFTPKDGSSAKEWE	X;X;Acetyl (K);X;X;X;X;X;X;X;X;X;X;X;X;Acetyl (K);X;X;X;X;X;Acetyl (K);X;X;X;X;X;X;X;X;X	XXXXXXXXXXXPPPPPPPPPPPXXXXXXXXX	AGTFK(1)LVFTPK	5	2	1.3428		1055;1056;1057;1058;1059;1060	1060	2759200	2581200	2433600	1219400	3184800	2766200
P54071	199	P54071	P54071	sp|P54071|IDHP_MOUSE Isocitrate dehydrogenase [NADP], mitochondrial OS=Mus musculus OX=10090 GN=Idh2 PE=1 SV=3	1	0.000427476	86.477	1	K	FVVDRAGTFKLVFTPKDGSSAKEWEVYNFPA	X;X;X;X;X;X;X;X;X;X;X;X;X;X;X;Acetyl (K);X;X;X;X;X;X;X;X;X;X;X;X;X;X;X	XXXXXXXXXXPPPPPPPPPPPPXXXXXXXXX	LVFTPK(1)DGSSAK	6	2	-0.22448		19004;19005;19006;19007;19008;19009;19010;19011;19012	19012	172790	196170	159500	176010	214820	217260
P54071	272	P54071	P54071	sp|P54071|IDHP_MOUSE Isocitrate dehydrogenase [NADP], mitochondrial OS=Mus musculus OX=10090 GN=Idh2 PE=1 SV=3	1	1.10489e-30	154.03	1;2	K	AYDGRFKDIFQEIFDKHYKTDFDKNKIWYEH	X;X;X;X;X;X;Acetyl (K);X;X;X;X;X;X;X;X;Acetyl (K);X;X;Acetyl (K);X;X;X;X;Acetyl (K);X;Acetyl (K);X;X;X;X;X	XXXXXPPPPPPPPPPPPPPXXXXXXXXXXXX	FK(1)DIFQEIFDK(1)HYK	11	2	-0.70788		3707;3708;3709;3710;3711;3712;6418;6419;6420;6421	6421	1471800	1961200	3084700	957480	1941700	1651200
P54071	275	P54071	P54071	sp|P54071|IDHP_MOUSE Isocitrate dehydrogenase [NADP], mitochondrial OS=Mus musculus OX=10090 GN=Idh2 PE=1 SV=3	1	7.20943e-05	109.38	1;2	K	GRFKDIFQEIFDKHYKTDFDKNKIWYEHRLI	X;X;X;Acetyl (K);X;X;X;X;X;X;X;X;X;X;X;Acetyl (K);X;X;X;X;Acetyl (K);X;Acetyl (K);X;X;X;X;X;X;X;X	XXXXXXXXXXXXXPPPPPPPPPPXXXXXXXX	HYK(1)TDFDK(1)NK	3	2	1.9916		12400;12401;12402;12403;12404;12405;12406;12407;12408;12409;12410;12411;12412	12412	3879500	3796600	3806900	3620100	3988400	3541400
P54071	106	P54071	P54071	sp|P54071|IDHP_MOUSE Isocitrate dehydrogenase [NADP], mitochondrial OS=Mus musculus OX=10090 GN=Idh2 PE=1 SV=3	1	5.12702e-184	375.95	1	K	QTNDQVTIDSALATQKYSVAVKCATITPDEA	X;X;X;X;X;X;X;X;X;X;X;X;X;X;X;Acetyl (K);X;X;X;X;X;X;X;X;X;X;X;X;X;X;X	PPPPPPPPPPPPPPPPPPPPPPXXXXXXXXX	DQTNDQVTIDSALATQK(1)YSVAVK	17	2	-2.1199		4052;4053;4054;4055;4056;4057;4058;4059;4060;4061;4062;4063;4064;4065;4066;4067	4067	115720	514360	2239300	503440	952720	831020
P54071	69	P54071	P54071	sp|P54071|IDHP_MOUSE Isocitrate dehydrogenase [NADP], mitochondrial OS=Mus musculus OX=10090 GN=Idh2 PE=1 SV=3	1	6.69536e-31	186.82	1	K	DGDEMTRIIWQFIKEKLILPHVDVQLKYFDL	X;X;X;X;Oxidation (M);X;X;X;X;X;X;X;X;X;X;Acetyl (K);X;X;X;X;X;X;X;X;X;X;Acetyl (K);X;X;X;X	XXXXXXXXXXXXXXPPPPPPPPPPPPPXXXX	EK(1)LILPHVDVQLK	2	2	-0.13026		4961;4962;4963;4964;4965;4966;4967	4967	823720	1296100	1386800	813710	1173100	1049800
P54071	80	P54071	P54071	sp|P54071|IDHP_MOUSE Isocitrate dehydrogenase [NADP], mitochondrial OS=Mus musculus OX=10090 GN=Idh2 PE=1 SV=3	1	1.38903e-15	158.95	1	K	FIKEKLILPHVDVQLKYFDLGLPNRDQTNDQ	X;X;Acetyl (K);X;X;X;X;X;X;X;X;X;X;X;X;Acetyl (K);X;X;X;X;X;X;X;X;X;X;X;X;X;X;X	XXXXXPPPPPPPPPPPPPPPPPPPPXXXXXX	LILPHVDVQLK(1)YFDLGLPNR	11	3	-1.4897		16922;16923;16924;16925;16926;16927;16928	16928	13656	73563	33682	58925	56450	61593
P54071	155	P54071	P54071	sp|P54071|IDHP_MOUSE Isocitrate dehydrogenase [NADP], mitochondrial OS=Mus musculus OX=10090 GN=Idh2 PE=1 SV=3	1	6.50464e-25	175.79	1	K	RNILGGTVFREPIICKNIPRLVPGWTKPITI	X;X;X;X;X;X;X;X;X;X;X;X;X;X;X;Acetyl (K);X;X;X;X;X;X;X;X;X;X;Acetyl (K);X;X;X;X	XXXXXXXXXXPPPPPPPPPPXXXXXXXXXXX	EPIICK(1)NIPR	6	2	2.9647		5249;5250;5251;5252;5253;5254	5254	5609700	5454600	6414600	4786200	6184000	6372900
P54071	400	P54071	P54071	sp|P54071|IDHP_MOUSE Isocitrate dehydrogenase [NADP], mitochondrial OS=Mus musculus OX=10090 GN=Idh2 PE=1 SV=3	1	4.67827e-94	255.69	1	K	LDGNQDLIRFAQTLEKVCVQTVESGAMTKDL	X;X;X;X;X;X;X;X;X;X;X;X;X;X;X;Acetyl (K);X;X;X;X;X;X;X;X;X;X;Oxidation (M);X;X;X;X	XXXXXXXXXPPPPPPPPPPPPPPPPPPPPXX	FAQTLEK(1)VCVQTVESGAMTK	7	2	-2.946		5657;5658;5659;5660;5661;5662;5663;5664;5665;5666;5667;5668;5669;5670;5671;5672;5673;5674;5675;5676;5677;5678;5679;5680;5681;5682;5683	5683	6269400	8068700	10569000	6938500	8152900	7456800
P54071	263	P54071	P54071	sp|P54071|IDHP_MOUSE Isocitrate dehydrogenase [NADP], mitochondrial OS=Mus musculus OX=10090 GN=Idh2 PE=1 SV=3	1	8.75832e-05	74.953	1;2	K	LSTKNTILKAYDGRFKDIFQEIFDKHYKTDF	X;X;X;X;X;X;X;X;Acetyl (K);X;X;X;X;X;X;Acetyl (K);X;X;X;X;X;X;X;X;Acetyl (K);X;X;Acetyl (K);X;X;X	XXXXXXXXXXXXXXPPPPPPPPPPPPPPXXX	FK(1)DIFQEIFDK(1)HYK	2	2	-0.70788		6413;6414;6415;6416;6417;6418;6419;6420;6421	6421	2019.2	14485	30787	0	17029	9702.7
P54071	384	P54071	P54071	sp|P54071|IDHP_MOUSE Isocitrate dehydrogenase [NADP], mitochondrial OS=Mus musculus OX=10090 GN=Idh2 PE=1 SV=3	1	8.01235e-24	163.86	1	K	IASIFAWTRGLEHRGKLDGNQDLIRFAQTLE	X;X;X;X;X;X;X;X;X;X;X;X;X;X;X;Acetyl (K);X;X;X;X;X;X;X;X;X;X;X;X;X;X;X	XXXXXXXXXXXXXXPPPPPPPPPPPXXXXXX	GK(1)LDGNQDLIR	2	2	1.2355		8539;8540;8541;8542;8543;8544;8545;8546;8547;8548;8549;8550;8551;8552;8553;8554;8555;8556;8557;8558;8559	8559	6304700	6016500	6844200	7867500	7253000	7124700
P54071	180	P54071	P54071	sp|P54071|IDHP_MOUSE Isocitrate dehydrogenase [NADP], mitochondrial OS=Mus musculus OX=10090 GN=Idh2 PE=1 SV=3	1	1.79915e-26	207.6	1	K	TKPITIGRHAHGDQYKATDFVVDRAGTFKLV	X;Acetyl (K);X;X;X;X;X;X;X;X;X;X;X;X;X;Acetyl (K);X;X;X;X;X;X;X;X;X;X;X;X;Acetyl (K);X;X	XXXXXXXXPPPPPPPPPPPPPPPPXXXXXXX	HAHGDQYK(1)ATDFVVDR	8	3	-1.6773		10022;10023;10024;10025;10026;10027;10028;10029;10030;10031;10032;10033;10034;10035;10036;10037	10037	14358000	15092000	14774000	14233000	14731000	14389000
P54071	280	P54071	P54071	sp|P54071|IDHP_MOUSE Isocitrate dehydrogenase [NADP], mitochondrial OS=Mus musculus OX=10090 GN=Idh2 PE=1 SV=3	1	7.20943e-05	120.11	1;2	K	IFQEIFDKHYKTDFDKNKIWYEHRLIDDMVA	X;X;X;X;X;X;X;Acetyl (K);X;X;Acetyl (K);X;X;X;X;Acetyl (K);X;Acetyl (K);X;X;X;X;X;X;X;X;X;X;Oxidation (M);X;X	XXXXXXXXPPPPPPPPPPPPPPPPXXXXXXX	TDFDK(1)NK(1)IWYEHR	5	2	0.69547		12407;12408;12409;12410;12411;12412;28641;28642;28643;28644;28645;28646;28647;28648;28649;28650;28651	28651	49332	614310	689940	812400	898800	714600
P54071	282	P54071	P54071	sp|P54071|IDHP_MOUSE Isocitrate dehydrogenase [NADP], mitochondrial OS=Mus musculus OX=10090 GN=Idh2 PE=1 SV=3	1	6.03693e-16	118.47	1;2	K	QEIFDKHYKTDFDKNKIWYEHRLIDDMVAQV	X;X;X;X;X;Acetyl (K);X;X;Acetyl (K);X;X;X;X;Acetyl (K);X;Acetyl (K);X;X;X;X;X;X;X;X;X;X;Oxidation (M);X;X;X;X	XXXXXXXXXPPPPPPPPPPPPPXXXXXXXXX	TDFDK(1)NK(1)IWYEHR	7	2	0.69547		21159;21160;21161;21162;21163;21164;28646;28647;28648;28649;28650;28651	28651	1227100	1658900	1320500	1499500	1642900	1614200
P54071	45	P54071	P54071	sp|P54071|IDHP_MOUSE Isocitrate dehydrogenase [NADP], mitochondrial OS=Mus musculus OX=10090 GN=Idh2 PE=1 SV=3	1	1.12794e-07	102.8	2	K	SWPEQPRRHYAEKRIKVEKPVVEMDGDEMTR	X;X;X;X;X;X;X;X;X;X;X;X;X;X;X;Acetyl (K);X;X;Acetyl (K);X;X;X;X;Oxidation (M);X;X;X;X;Oxidation (M);X;X	XXXXXXXXXXXXXXPPPPPPPPPPPPPPPPP	IK(1)VEK(1)PVVEMDGDEMTR	2	2	-1.1661		13519;13520;13521;13522;13523;13524	13524	59249	61615	81441	54743	70586	64830
P54071	48	P54071	P54071	sp|P54071|IDHP_MOUSE Isocitrate dehydrogenase [NADP], mitochondrial OS=Mus musculus OX=10090 GN=Idh2 PE=1 SV=3	1	3.77334e-23	180.21	1;2	K	EQPRRHYAEKRIKVEKPVVEMDGDEMTRIIW	X;X;X;X;X;X;X;X;X;X;X;X;Acetyl (K);X;X;Acetyl (K);X;X;X;X;Oxidation (M);X;X;X;X;Oxidation (M);X;X;X;X;X	XXXXXXXXXXXPPPPPPPPPPPPPPPPPXXX	VEK(1)PVVEMDGDEMTR	3	2	0.26724		13507;13508;13509;13510;13511;13512;13513;13514;13515;13516;13517;13518;13519;13520;13521;13522;13523;13524;35814;35815;35816;35817;35818;35819;35820;35821;35822;35823;35824;35825;35826;35827;35828;35829;35830;35831;35832;35833;35834;35835;35836;35837;35838;35839;35840;35841;35842;35843;35844;35845	35845	186180	213620	397180	145810	191770	150580
P54071	166	P54071	P54071	sp|P54071|IDHP_MOUSE Isocitrate dehydrogenase [NADP], mitochondrial OS=Mus musculus OX=10090 GN=Idh2 PE=1 SV=3	1	0.000225777	118.33	1	K	PIICKNIPRLVPGWTKPITIGRHAHGDQYKA	X;X;X;X;Acetyl (K);X;X;X;X;X;X;X;X;X;X;Acetyl (K);X;X;X;X;X;X;X;X;X;X;X;X;X;Acetyl (K);X	XXXXXXXXXPPPPPPPPPPPPPXXXXXXXXX	LVPGWTK(1)PITIGR	7	2	0.52902		19154;19155;19156;19157;19158;19159	19159	2243900	3092800	2286100	2938200	3150300	3174200
P54071	133	P54071	P54071	sp|P54071|IDHP_MOUSE Isocitrate dehydrogenase [NADP], mitochondrial OS=Mus musculus OX=10090 GN=Idh2 PE=1 SV=3	1	3.12876e-06	110.82	1	K	PDEARVEEFKLKKMWKSPNGTIRNILGGTVF	X;X;X;X;X;X;X;X;X;X;X;X;X;Oxidation (M);X;Acetyl (K);X;X;X;X;X;X;X;X;X;X;X;X;X;X;X	XXXXXXXXXXXXXPPPPPPPPPPXXXXXXXX	MWK(1)SPNGTIR	3	2	0.24242		20607;20608;20609;20610;20611;20612;20613;20614;20615;20616	20616	2847000	3056600	2638400	3094300	3301500	3496700
P54071	256	P54071	P54071	sp|P54071|IDHP_MOUSE Isocitrate dehydrogenase [NADP], mitochondrial OS=Mus musculus OX=10090 GN=Idh2 PE=1 SV=3	1	7.7173e-18	110.04	1	K	QKKWPLYLSTKNTILKAYDGRFKDIFQEIFD	X;X;X;X;X;X;X;X;X;X;X;X;X;X;X;Acetyl (K);X;X;X;X;X;X;Acetyl (K);X;X;X;X;X;X;X;X	XXXXXXXXXXXPPPPPPPPPPXXXXXXXXXX	NTILK(1)AYDGR	5	2	-0.16562		21624;21625;21626;21627;21628;21629;21630;21631;21632;21633	21633	3352100	3726500	3596800	3624200	4135500	4256300
P54822	284	P54822	P54822	sp|P54822|PUR8_MOUSE Adenylosuccinate lyase OS=Mus musculus OX=10090 GN=Adsl PE=1 SV=2	1	2.7133e-10	102.42	1	K	IRLLANLKEMEEPFEKQQIGSSAMPYKRNPM	X;X;X;X;X;X;X;X;X;X;X;X;X;X;X;Acetyl (K);X;X;X;X;X;X;X;X;X;X;X;X;X;X;X	XXXXXXXXPPPPPPPPPPPPPPPPPPPXXXX	EMEEPFEK(1)QQIGSSAMPYK	8	2	2.6449		5173;5174;5175;5176;5177	5177	9443.5	11117	17826	7497	11439	0
P56135	8	P56135	P56135	sp|P56135|ATPK_MOUSE ATP synthase subunit f, mitochondrial OS=Mus musculus OX=10090 GN=Atp5mf PE=1 SV=3	1	0.00225169	63.694	1	K	________MASLVPLKEKKLMEVKLGELPSW	X;X;X;X;X;X;X;X;X;X;X;X;X;X;X;Acetyl (K);X;X;X;X;Oxidation (M);X;X;Acetyl (K);X;X;X;X;X;X;X	XXXXXXXXXPPPPPPPPPXXXXXXXXXXXXX	ASLVPLK(1)EK	7	2	-0.53053		2383;2384;2385;2386;2387	2387	36047	40571	15557	0	15844	7677
P56135	16	P56135	P56135	sp|P56135|ATPK_MOUSE ATP synthase subunit f, mitochondrial OS=Mus musculus OX=10090 GN=Atp5mf PE=1 SV=3	1	7.00925e-06	75.107	1	K	MASLVPLKEKKLMEVKLGELPSWIMMRDFTP	X;X;X;X;X;X;X;Acetyl (K);X;X;X;X;Oxidation (M);X;X;Acetyl (K);X;X;X;X;X;X;X;X;Oxidation (M);Oxidation (M);X;X;X;X;X	XXXXXXXXXXXPPPPPPPPPPPPPPPPXXXX	LMEVK(1)LGELPSWIMMR	5	2	1.4211		17923;17924;17925;17926;17927;17928	17928	0	9299.1	36260	4697.9	13379	15206
P56135	48	P56135	P56135	sp|P56135|ATPK_MOUSE ATP synthase subunit f, mitochondrial OS=Mus musculus OX=10090 GN=Atp5mf PE=1 SV=3	1	3.24373e-06	101.78	1	K	GIAGAFRRGYDRYYNKYINVRKGSISGISMV	X;X;X;X;X;X;X;X;X;X;X;X;X;X;X;Acetyl (K);X;X;X;X;X;X;X;X;X;X;X;X;X;X;X	XXXXXXXXXXXXPPPPPPPPPXXXXXXXXXX	YYNK(1)YINVR	4	2	-0.75045		40111;40112;40113;40114;40115	40115	71231	70943	66201	0	35384	29286
P56212;P60840	58;63	P56212;P60840	P60840	sp|P56212|ARP19_MOUSE cAMP-regulated phosphoprotein 19 OS=Mus musculus OX=10090 GN=Arpp19 PE=1 SV=2;sp|P60840|ENSA_MOUSE Alpha-endosulfine OS=Mus musculus OX=10090 GN=Ensa PE=1 SV=1	1	8.36666e-06	103.96	1	K	PGGSDFLMKRLQKGQKYFDSGDYNMAKAKMK;PGGSDFLRKRLQKGQKYFDSGDYNMAKAKMK	X;X;X;X;X;X;X;X;X;X;X;X;X;X;X;Acetyl (K);X;X;X;X;X;X;X;X;X;X;X;X;X;X;X	XXXXXXXXXXXXXPPPPPPPPPPPPPPXXXX	GQK(1)YFDSGDYNMAK	3	2	2.4872		9122;9123;9124;9125;9126	9126	22262	17461	14250	0	8810	2414.8
P56375	92	P56375	P56375	sp|P56375|ACYP2_MOUSE Acylphosphatase-2 OS=Mus musculus OX=10090 GN=Acyp2 PE=1 SV=2	1	0.0280569	55.962	1	K	GSPSSRIDRADFSNEKTISKLEYSDFSIRY_	X;X;X;X;X;X;X;X;X;X;X;X;X;X;X;Acetyl (K);X;X;X;Acetyl (K);X;X;X;X;X;X;X;X;X;X;X	XXXXXXXXXPPPPPPPPPPPXXXXXXXXXXX	ADFSNEK(1)TISK	7	2	-2.404		446;447	447	24848	15639	0	0	0	0
P56375	96	P56375	P56375	sp|P56375|ACYP2_MOUSE Acylphosphatase-2 OS=Mus musculus OX=10090 GN=Acyp2 PE=1 SV=2	1	3.47981e-06	102.77	1	K	SRIDRADFSNEKTISKLEYSDFSIRY_____	X;X;X;X;X;X;X;X;X;X;X;X;X;X;X;Acetyl (K);X;X;X;X;X;X;X;X;X;X;X;X;X;X;X	XXXXXXXXXXXXPPPPPPPPPPPPPXXXXXX	TISK(1)LEYSDFSIR	4	2	-1.1017		30997;30998;30999;31000;31001	31001	44745	37805	0	32154	32954	27693
P56375	65	P56375	P56375	sp|P56375|ACYP2_MOUSE Acylphosphatase-2 OS=Mus musculus OX=10090 GN=Acyp2 PE=1 SV=2	1	1.69218e-23	143.36	1	K	TSKGTVTGQVQGPEEKVDAMKSWLSKVGSPS	X;X;X;X;X;X;X;X;X;X;X;X;X;X;X;Acetyl (K);X;X;X;X;X;X;X;X;X;Acetyl (K);X;X;X;X;X	XXXPPPPPPPPPPPPPPPPPPXXXXXXXXXX	GTVTGQVQGPEEK(1)VDAMK	13	2	-0.40673		9549;9550;9551;9552;9553;9554	9554	106320	71542	67927	63197	75139	88974
P56375	75	P56375	P56375	sp|P56375|ACYP2_MOUSE Acylphosphatase-2 OS=Mus musculus OX=10090 GN=Acyp2 PE=1 SV=2	1	0.000655184	62.706	1	K	QGPEEKVDAMKSWLSKVGSPSSRIDRADFSN	X;X;X;X;X;Acetyl (K);X;X;X;X;X;X;X;X;X;Acetyl (K);X;X;X;X;X;X;X;X;X;X;X;X;X;X;X	XXXXXXXXXXXPPPPPPPPPPPPXXXXXXXX	SWLSK(1)VGSPSSR	5	2	-1.7611		27653;27654;27655;27656;27657	27657	32883	34871	12877	0	22782	11180
P56379	8	P56379	P56379	sp|P56379|ATP68_MOUSE ATP synthase subunit ATP5MJ, mitochondrial OS=Mus musculus OX=10090 GN=Atp5mj PE=1 SV=1	1	1.13207e-07	120.19	1	K	________MFQTLIQKVWVPMKPYYTQVYQE	X;X;X;X;X;X;X;X;Oxidation (M);X;X;X;X;X;X;Acetyl (K);X;X;X;X;X;X;X;X;X;X;X;X;X;X;X	XXXXXXXXPPPPPPPPPPPPPPXXXXXXXXX	MFQTLIQK(1)VWVPMK	8	2	-4.3571		19770;19771;19772	19772	0	3543.6	0	0	0	9128.8
P56382	37	P56382	P56382	sp|P56382|ATP5E_MOUSE ATP synthase subunit epsilon, mitochondrial OS=Mus musculus OX=10090 GN=Atp5f1e PE=1 SV=2	1	7.75429e-16	165.28	1	K	AVRDALKTEFKANAEKTSGSSIKIVKVSKKE	X;X;X;X;X;X;X;X;X;X;X;X;X;X;X;Acetyl (K);X;X;X;X;X;X;Acetyl (K);X;X;X;X;X;X;X;X	XXXXXXXXXXXPPPPPPPPPPPPXXXXXXXX	ANAEK(1)TSGSSIK	5	2	-1.489		1933;1934;1935;1936;1937;1938	1938	2068100	1758100	1887600	1731700	1696500	1735400
P56382	44	P56382	P56382	sp|P56382|ATP5E_MOUSE ATP synthase subunit epsilon, mitochondrial OS=Mus musculus OX=10090 GN=Atp5f1e PE=1 SV=2	1	0.0316144	40.397	1	K	TEFKANAEKTSGSSIKIVKVSKKE_______	X;X;X;Acetyl (K);X;X;X;X;X;X;X;X;X;X;X;Acetyl (K);X;X;X;X;X;X;X;X;X;X;X;X;X;X;X	XXXXXXXXXPPPPPPPPPPXXXXXXXXXXXX	TSGSSIK(1)IVK	7	2	-0.042872		33355	33355	91034	0	0	0	0	0
P56382	21	P56382	P56382	sp|P56382|ATP5E_MOUSE ATP synthase subunit epsilon, mitochondrial OS=Mus musculus OX=10090 GN=Atp5f1e PE=1 SV=2	1	1.62566e-06	145.7	1	K	RQAGLSYIRFSQICAKAVRDALKTEFKANAE	X;X;X;X;X;X;X;X;X;X;X;X;X;X;X;Acetyl (K);X;X;X;X;X;X;X;X;X;X;Acetyl (K);X;X;X;X	XXXXXXXXXPPPPPPPPPPXXXXXXXXXXXX	FSQICAK(1)AVR	7	2	-0.43013		7055;7056;7057;7058;7059;7060	7060	2301000	2264600	2526200	1897300	2374200	2495400
P56382	32	P56382	P56382	sp|P56382|ATP5E_MOUSE ATP synthase subunit epsilon, mitochondrial OS=Mus musculus OX=10090 GN=Atp5f1e PE=1 SV=2	1	1.12235e-06	74.178	1	K	QICAKAVRDALKTEFKANAEKTSGSSIKIVK	X;X;X;X;Acetyl (K);X;X;X;X;X;X;X;X;X;X;Acetyl (K);X;X;X;X;Acetyl (K);X;X;X;X;X;X;Acetyl (K);X;X;X	XXXXXXXXXXXXPPPPPPPPPXXXXXXXXXX	TEFK(1)ANAEK	4	2	-1.0304		28952;28953;28954;28955;28956;28957	28957	97368	111690	111410	99573	108070	99167
P56391	42	P56391	P56391	sp|P56391|CX6B1_MOUSE Cytochrome c oxidase subunit 6B1 OS=Mus musculus OX=10090 GN=Cox6b1 PE=1 SV=2	1	7.463e-05	104.09	1	K	TKNCWQNYLDFHRCEKAMTAKGGDVSVCEWY	X;X;X;X;X;X;X;X;X;X;X;X;X;X;X;Acetyl (K);X;X;X;X;X;X;X;X;X;X;X;X;X;X;X	XXXXXXXXXXXXXPPPPPPPPXXXXXXXXXX	CEK(1)AMTAK	3	2	-1.0862		3062;3063;3064;3065;3066	3066	73518	72849	38193	17588	0	22441
P56391	13	P56391	P56391	sp|P56391|CX6B1_MOUSE Cytochrome c oxidase subunit 6B1 OS=Mus musculus OX=10090 GN=Cox6b1 PE=1 SV=2	1	0.000491793	108.97	1	K	___MAEDIKTKIKNYKTAPFDSRFPNQNQTK	X;X;X;X;X;X;X;X;X;X;X;X;X;X;X;Acetyl (K);X;X;X;X;X;X;X;X;X;X;X;X;X;X;X	XXXXXXXXXXXXXPPPPPPPPPPXXXXXXXX	NYK(1)TAPFDSR	3	2	-0.99602		21858;21859;21860;21861;21862;21863	21863	2455600	1522500	966400	533920	1372500	622870
P56391	62	P56391	P56391	sp|P56391|CX6B1_MOUSE Cytochrome c oxidase subunit 6B1 OS=Mus musculus OX=10090 GN=Cox6b1 PE=1 SV=2	1	4.83026e-07	75.204	1	K	KGGDVSVCEWYRRVYKSLCPVSWVSAWDDRI	X;X;X;X;X;X;X;X;X;X;X;X;X;X;X;Acetyl (K);X;X;X;X;X;X;X;X;X;X;X;X;X;X;X	XXXXXXXXXXXXXPPPPPPPPPPPPPPPPPX	VYK(1)SLCPVSWVSAWDDR	3	2	-0.99032		38227;38228	38228	0	14264	3638	0	0	0
P56392	31	P56392	P56392	sp|P56392|CX7A1_MOUSE Cytochrome c oxidase subunit 7A1, mitochondrial OS=Mus musculus OX=10090 GN=Cox7a1 PE=1 SV=1	1	1.15774e-119	237.03	1	K	SSTRSHLENRVAEKQKLFQADNDLPVHLKGG	X;X;X;X;X;X;X;X;X;X;X;X;X;X;X;Acetyl (K);X;X;X;X;X;X;X;X;X;X;X;X;X;X;X	XXXXXXXXXXXXXXPPPPPPPPPPPPPPPXX	QK(1)LFQADNDLPVHLK	2	2	1.2967		23613;23614;23615;23616;23617;23618;23619;23620;23621;23622	23622	1382000	1155100	1184600	859990	1226400	1136300
P56394	40	P56394	P56394	sp|P56394|COX17_MOUSE Cytochrome c oxidase copper chaperone OS=Mus musculus OX=10090 GN=Cox17 PE=1 SV=2	1	1.22449e-07	72.494	1	K	ACPETKKARDACIIEKGEEHCGHLIEAHKEC	X;X;X;X;X;X;X;X;X;X;X;X;X;X;X;Acetyl (K);X;X;X;X;X;X;X;X;X;X;X;X;X;X;X	XXXXXXXXXPPPPPPPPPPPPPPPPPPPPXX	DACIIEK(1)GEEHCGHLIEAHK	7	3	-0.59064		3304;3305;3306;3307;3308	3308	28476	21754	14428	17789	0	11871
P56395	19	P56395	P56395	sp|P56395|CYB5_MOUSE Cytochrome b5 OS=Mus musculus OX=10090 GN=Cyb5a PE=1 SV=2	1	1.45439e-22	166.02	1	K	QSDKDVKYYTLEEIQKHKDSKSTWVILHHKV	X;X;X;X;X;X;X;X;X;X;X;X;X;X;X;Acetyl (K);X;X;X;X;X;X;X;X;X;X;X;X;X;X;X	XXXXXXXPPPPPPPPPPPXXXXXXXXXXXXX	YYTLEEIQK(1)HK	9	2	0.45914		40120;40121;40122;40123;40124	40124	47096	0	40558	22539	53821	16677
P56480	522	P56480	P56480	sp|P56480|ATPB_MOUSE ATP synthase subunit beta, mitochondrial OS=Mus musculus OX=10090 GN=Atp5f1b PE=1 SV=2	1	0.00064649	120.79	1	K	FYMVGPIEEAVAKADKLAEEHGS________	X;X;X;X;X;X;X;X;X;X;X;X;X;X;X;Acetyl (K);X;X;X;X;X;X;X;X;X;X;X;X;X;X;X	XXXXXXXXXXXXXPPPPPPPPPPXXXXXXXX	ADK(1)LAEEHGS	3	2	-0.040771		462;463;464;465;466;467;468;469;470;471;472;473	473	6309500	5810100	6543700	5549200	6357500	5921000
P56480	259	P56480	P56480	sp|P56480|ATPB_MOUSE ATP synthase subunit beta, mitochondrial OS=Mus musculus OX=10090 GN=Atp5f1b PE=1 SV=2	1	6.89831e-109	313.96	1	K	NDLYHEMIESGVINLKDATSKVALVYGQMNE	X;X;X;X;X;X;Oxidation (M);X;X;X;X;X;X;X;X;Acetyl (K);X;X;X;X;X;X;X;X;X;X;X;X;Oxidation (M);X;X	PPPPPPPPPPPPPPPPPPPPPXXXXXXXXXX	EGNDLYHEMIESGVINLK(1)DATSK	18	3	-0.65185		4735;4736;4737;4738;4739;4740;4741;4742;4743;4744;4745;4746	4746	13534	109660	105650	105410	129270	160660
P56480	201	P56480	P56480	sp|P56480|ATPB_MOUSE ATP synthase subunit beta, mitochondrial OS=Mus musculus OX=10090 GN=Atp5f1b PE=1 SV=2	1	7.23205e-06	84.829	1	K	GIKVVDLLAPYAKGGKIGLFGGAGVGKTVLI	X;X;X;X;X;X;X;X;X;X;X;X;X;X;X;Acetyl (K);X;X;X;X;X;X;X;X;X;X;X;X;X;X;X	XXXXXXXXXXXXXPPPPPPPPPPPPPPXXXX	GGK(1)IGLFGGAGVGK	3	2	-0.72458		8055;8056;8057;8058;8059;8060	8060	655260	399740	496130	102150	777490	127110
P56480	124	P56480	P56480	sp|P56480|ATPB_MOUSE ATP synthase subunit beta, mitochondrial OS=Mus musculus OX=10090 GN=Atp5f1b PE=1 SV=2	1	3.66678e-12	122.25	1;2	K	RTIAMDGTEGLVRGQKVLDSGAPIKIPVGPE	X;X;X;X;Oxidation (M);X;X;X;X;X;X;X;X;X;X;Acetyl (K);X;X;X;X;X;X;X;X;Acetyl (K);X;X;X;X;X;X	XXXXXXXXXXXXXPPPPPPPPPPPPPPPPPP	GQK(1)VLDSGAPIK(1)IPVGPETLGR	3	2	-1.6603		9111;9112;9113;9114;9115;9116;9117;9118;9119;9120;9121	9121	2373200	2977700	2822800	3104100	2851600	2608500
P56480	133	P56480	P56480	sp|P56480|ATPB_MOUSE ATP synthase subunit beta, mitochondrial OS=Mus musculus OX=10090 GN=Atp5f1b PE=1 SV=2	1	2.37949e-29	174.57	1;2	K	GLVRGQKVLDSGAPIKIPVGPETLGRIMNVI	X;X;X;X;X;X;Acetyl (K);X;X;X;X;X;X;X;X;Acetyl (K);X;X;X;X;X;X;X;X;X;X;X;Oxidation (M);X;X;X	XXXXPPPPPPPPPPPPPPPPPPPPPPXXXXX	VLDSGAPIK(1)IPVGPETLGR	9	2	-2.1351		9118;9119;9120;9121;36745;36746;36747;36748;36749;36750;36751;36752;36753;36754;36755;36756;36757;36758;36759	36759	18016000	17740000	17958000	17075000	17702000	16996000
P56480	426	P56480	P56480	sp|P56480|ATPB_MOUSE ATP synthase subunit beta, mitochondrial OS=Mus musculus OX=10090 GN=Atp5f1b PE=1 SV=2	1	2.31386e-08	102.76	1	K	NIVGNEHYDVARGVQKILQDYKSLQDIIAIL	X;X;X;X;X;X;X;X;X;X;X;X;X;X;X;Acetyl (K);X;X;X;X;X;X;X;X;X;X;X;X;X;X;X	XXXXXXXXXXXXPPPPPPPPPPXXXXXXXXX	GVQK(1)ILQDYK	4	2	0.7254		9693;9694;9695;9696;9697;9698	9698	282530	320980	225380	223110	265980	241250
P56480	198	P56480	P56480	sp|P56480|ATPB_MOUSE ATP synthase subunit beta, mitochondrial OS=Mus musculus OX=10090 GN=Atp5f1b PE=1 SV=2	1	0.0212535	53.342	1	K	LVTGIKVVDLLAPYAKGGKIGLFGGAGVGKT	X;X;X;X;X;X;X;X;X;X;X;X;X;X;X;Acetyl (K);X;X;Acetyl (K);X;X;X;X;X;X;X;X;X;X;X;X	XXXXXXPPPPPPPPPPPPPXXXXXXXXXXXX	VVDLLAPYAK(1)GGK	10	2	0.49432		37857;37858;37859	37859	49880	60178	0	0	51290	0
P57780;Q7TPR4;Q9JI91;O88990	51;31;38;44	P57780;Q7TPR4;Q9JI91	Q9JI91	sp|P57780|ACTN4_MOUSE Alpha-actinin-4 OS=Mus musculus OX=10090 GN=Actn4 PE=1 SV=1;sp|Q7TPR4|ACTN1_MOUSE Alpha-actinin-1 OS=Mus musculus OX=10090 GN=Actn1 PE=1 SV=1;sp|Q9JI91|ACTN2_MOUSE Alpha-actinin-2 OS=Mus musculus OX=10090 GN=Actn2 PE=1 SV=2;sp|O88990|	1	0.000480205	69.483	1	K	EDDWDRDLLLDPAWEKQQRKTFTAWCNSHLR;EEDWDRDLLLDPAWEKQQRKTFTAWCNSHLR;EEEWDRDLLLDPAWEKQQRKTFTAWCNSHLR	X;X;X;X;X;X;X;X;X;X;X;X;X;X;X;Acetyl (K);X;X;X;X;X;X;X;X;X;X;X;X;X;X;X	XXXXXXPPPPPPPPPPPPPXXXXXXXXXXXX	DLLLDPAWEK(1)QQR	10	2	-0.94632		3865;3866;3867	3867	19395	15642	8753.9	0	0	0
P58252	445	P58252	P58252	sp|P58252|EF2_MOUSE Elongation factor 2 OS=Mus musculus OX=10090 GN=Eef2 PE=1 SV=2	1	0.00259659	52.996	1	K	MGPNYTPGKKEDLYLKPIQRTILMMGRYVEP	X;X;X;X;X;X;X;X;X;X;X;X;X;X;X;Acetyl (K);X;X;X;X;X;X;X;X;X;X;X;X;X;X;X	XXXXXXXXXPPPPPPPPPPPXXXXXXXXXXX	EDLYLK(1)PIQR	6	2	-1.7647		4477;4478;14822;14823	4478	46967	46331	0	0	0	0
P58252	337	P58252	P58252	sp|P58252|EF2_MOUSE Elongation factor 2 OS=Mus musculus OX=10090 GN=Eef2 PE=1 SV=2	1	0.00178709	49.299	1	K	KLDSEDKDKEGKPLLKAVMRRWLPAGDALLQ	X;X;X;X;X;X;X;X;X;X;X;X;X;X;X;Acetyl (K);X;X;X;X;X;X;X;X;X;X;X;X;X;X;X	XXXXXXXXXXXXPPPPPPPPXXXXXXXXXXX	PLLK(1)AVMR	4	2	0.40925		22396;22397;22398;22399;22400	22400	172880	170460	47906	0	62186	32325
P58252	42	P58252	P58252	sp|P58252|EF2_MOUSE Elongation factor 2 OS=Mus musculus OX=10090 GN=Eef2 PE=1 SV=2	1	1.81046e-13	101.71	1	K	HVDHGKSTLTDSLVCKAGIIASARAGETRFT	X;X;X;X;X;X;X;X;X;X;X;X;X;X;X;Acetyl (K);X;X;X;X;X;X;X;X;X;X;X;X;X;X;X	XXXXXXPPPPPPPPPPPPPPPPPPXXXXXXX	STLTDSLVCK(1)AGIIASAR	10	2	-2.7651		27221;27222	27222	0	0	7857	0	4762.9	0
P58281	579	P58281	P58281	sp|P58281|OPA1_MOUSE Dynamin-like 120 kDa protein, mitochondrial OS=Mus musculus OX=10090 GN=Opa1 PE=1 SV=1	1	0.000464428	97.661	1	K	ADSFKATRFNLETEWKNNYPRLRELDRNELF	X;X;X;X;X;X;X;X;X;X;X;X;X;X;X;Acetyl (K);X;X;X;X;X;X;X;X;X;X;X;X;X;X;X	XXXXXXXXPPPPPPPPPPPPPXXXXXXXXXX	FNLETEWK(1)NNYPR	8	2	-0.13773		6865	6865	0	0	5921.8	0	0	0
P58281	713	P58281	P58281	sp|P58281|OPA1_MOUSE Dynamin-like 120 kDa protein, mitochondrial OS=Mus musculus OX=10090 GN=Opa1 PE=1 SV=1	1	0.024448	51.787	1	K	DKLKEAVKEESIKRHKWNDFAEDSLRVIQHN	X;X;X;X;X;X;X;X;X;X;X;X;X;X;X;Acetyl (K);X;X;X;X;X;X;X;X;X;X;X;X;X;X;X	XXXXXXXXXXXXXXPPPPPPPPPPPPXXXXX	HK(1)WNDFAEDSLR	2	2	-1.0423		10999	10999	3501	0	0	0	0	0
P58281	663	P58281	P58281	sp|P58281|OPA1_MOUSE Dynamin-like 120 kDa protein, mitochondrial OS=Mus musculus OX=10090 GN=Opa1 PE=1 SV=1	1	3.87451e-25	167.55	1	K	TFNTTVDIKLKQWTDKQLPNKAVEVAWETLQ	X;X;X;X;X;X;X;X;X;X;X;X;X;X;X;Acetyl (K);X;X;X;X;X;X;X;X;X;X;X;X;X;X;X	XXXXXXXXXXXPPPPPPPPPPXXXXXXXXXX	QWTDK(1)QLPNK	5	2	-1.2317		24078;24079;24080;24081;24082;24083	24083	34791	25330	23526	29777	36708	23935
P58281	474	P58281	P58281	sp|P58281|OPA1_MOUSE Dynamin-like 120 kDa protein, mitochondrial OS=Mus musculus OX=10090 GN=Opa1 PE=1 SV=1	1	0.000231533	80.683	1	K	GRRTIFVLTKVDLAEKNVASPSRIQQIIEGK	X;X;X;X;X;X;X;X;X;X;X;X;X;X;X;Acetyl (K);X;X;X;X;X;X;X;X;X;X;X;X;X;X;X	XXXXXXXXXXPPPPPPPPPPPPPXXXXXXXX	VDLAEK(1)NVASPSR	6	2	-0.7449		35657	35657	16473	0	0	0	0	0
P58771	48	P58771	P58771	sp|P58771|TPM1_MOUSE Tropomyosin alpha-1 chain OS=Mus musculus OX=10090 GN=Tpm1 PE=1 SV=1	1	0.00065819	125.39	1	K	EDRSKQLEDELVSLQKKLKGTEDELDKYSEA	X;X;X;X;X;X;X;X;X;X;X;X;X;X;X;Acetyl (K);X;X;X;X;X;X;X;X;X;X;X;X;X;X;X	XXXXXPPPPPPPPPPPPXXXXXXXXXXXXXX	QLEDELVSLQK(1)K	11	2	-2.1479		23665;23666;23667	23667	94818	19268	0	0	28073	0
P60710;P63260;P62737;P63268;P68033;P68134	61;61;63;62;63;63	P60710;P62737;P68033	P60710	sp|P60710|ACTB_MOUSE Actin, cytoplasmic 1 OS=Mus musculus OX=10090 GN=Actb PE=1 SV=1;sp|P63260|ACTG_MOUSE Actin, cytoplasmic 2 OS=Mus musculus OX=10090 GN=Actg1 PE=1 SV=1;sp|P62737|ACTA_MOUSE Actin, aortic smooth muscle OS=Mus musculus OX=10090 GN=Acta2 PE	1	0.00012965	141.75	1	K	GMGQKDSYVGDEAQSKRGILTLKYPIEHGII;GMGQKDSYVGDEAQSKRGILTLKYPIEHGIV	X;Oxidation (M);X;X;X;X;X;X;X;X;X;X;X;X;X;Acetyl (K);X;X;X;X;X;X;X;X;X;X;X;X;X;X;X	XXXXXPPPPPPPPPPPPXXXXXXXXXXXXXX	DSYVGDEAQSK(1)R	11	2	-1.4957		4116;4117;4118;4119;4120;4121	4121	74798	36546	33338	9816.5	20098	12799
P60840	114	P60840	P60840	sp|P60840|ENSA_MOUSE Alpha-endosulfine OS=Mus musculus OX=10090 GN=Ensa PE=1 SV=1	1	0.00154587	78.649	1	K	TPQDLPQRKSSLVTSKLAGGQVE________	X;X;X;X;X;X;X;X;X;X;X;X;X;X;X;Acetyl (K);X;X;X;X;X;X;X;X;X;X;X;X;X;X;X	XXXXXXXXXPPPPPPPPPPPPPPXXXXXXXX	SSLVTSK(1)LAGGQVE	7	2	-2.5752		27032;27033	27033	7065.5	0	0	4899.3	0	0
P60867	8	P60867	P60867	sp|P60867|RS20_MOUSE 40S ribosomal protein S20 OS=Mus musculus OX=10090 GN=Rps20 PE=1 SV=1	1	0.00243403	43.824	1	K	________MAFKDTGKTPVEPEVAIHRIRIT	X;X;X;X;X;X;X;X;X;X;X;X;X;X;X;Acetyl (K);X;X;X;X;X;X;X;X;X;X;X;X;X;X;X	XXXXXXXXXXXXPPPPPPPPPPPPPPPXXXX	DTGK(1)TPVEPEVAIHR	4	2	-3.2494		4130	4130	2072.9	0	0	0	0	0
P61014	3	P61014	P61014	sp|P61014|PPLA_MOUSE Cardiac phospholamban OS=Mus musculus OX=10090 GN=Pln PE=1 SV=1	1	6.80171e-05	77.925	1	K	_____________MEKVQYLTRSAIRRASTI	X;X;X;X;X;X;X;X;X;X;X;X;X;Oxidation (M);X;Acetyl (K);X;X;X;X;X;X;X;X;X;X;X;X;X;X;X	XXXXXXXXXXXXXPPPPPPPPPXXXXXXXXX	MEK(1)VQYLTR	3	2	-0.57846		19632;19633;19634;19635;19636;19637;19638;19639;19640;19641	19641	431350	446460	687840	0	446900	104460
P61027	102	P61027	P61027	sp|P61027|RAB10_MOUSE Ras-related protein Rab-10 OS=Mus musculus OX=10090 GN=Rab10 PE=1 SV=1	1	9.42643e-06	93.306	1	K	LVYDITNGKSFENISKWLRNIDEHANEDVER	X;X;X;X;X;X;X;X;X;X;X;X;X;X;X;Acetyl (K);X;X;X;X;X;X;X;X;X;X;X;X;X;X;X	XXXXXXXXXPPPPPPPPPPXXXXXXXXXXXX	SFENISK(1)WLR	7	2	-5.6592		25069;25070;25071;25072;25073	25073	15202	14534	15917	0	21343	11664
P61089	92	P61089	P61089	sp|P61089|UBE2N_MOUSE Ubiquitin-conjugating enzyme E2 N OS=Mus musculus OX=10090 GN=Ube2n PE=1 SV=1	1	0.00685267	42.856	1	K	HPNVDKLGRICLDILKDKWSPALQIRTVLLS	X;X;X;X;X;Acetyl (K);X;X;X;X;X;X;X;X;X;Acetyl (K);X;X;X;X;X;X;X;X;X;X;X;X;X;X;X	XXXXXXXXXPPPPPPPPPXXXXXXXXXXXXX	ICLDILK(1)DK	7	2	-0.50186		12664;12665;12666;12667;12668;12669	12669	27086	24041	31180	21721	31828	17684
P61089	82	P61089	P61089	sp|P61089|UBE2N_MOUSE Ubiquitin-conjugating enzyme E2 N OS=Mus musculus OX=10090 GN=Ube2n PE=1 SV=1	1	0.01208	44.966	1	K	PKVRFMTKIYHPNVDKLGRICLDILKDKWSP	X;X;X;X;X;X;X;X;X;X;X;X;X;X;X;Acetyl (K);X;X;X;X;X;X;X;X;X;Acetyl (K);X;X;X;X;X	XXXXXXXXPPPPPPPPPPPXXXXXXXXXXXX	IYHPNVDK(1)LGR	8	2	-2.2266		14731	14731	0	0	0	0	0	26080
P61222	431	P61222	P61222	sp|P61222|ABCE1_MOUSE ATP-binding cassette sub-family E member 1 OS=Mus musculus OX=10090 GN=Abce1 PE=1 SV=1	1	0.000139965	50.592	1	K	ISPKSTGSVRQLLHEKIRDAYTHPQFVTDVM	X;X;X;X;X;X;X;X;X;X;X;X;X;X;X;Acetyl (K);X;X;X;X;X;X;X;X;X;X;X;X;X;X;X	XXXXXXXXXXPPPPPPPPXXXXXXXXXXXXX	QLLHEK(1)IR	6	2	-0.84491		23713;23714;23715;23716;23717	23717	0	33377	39093	37852	43678	39932
P61957;Q9Z172	42;41	P61957;Q9Z172	P61957	sp|P61957|SUMO2_MOUSE Small ubiquitin-related modifier 2 OS=Mus musculus OX=10090 GN=Sumo2 PE=1 SV=1;sp|Q9Z172|SUMO3_MOUSE Small ubiquitin-related modifier 3 OS=Mus musculus OX=10090 GN=Sumo3 PE=1 SV=1	1	0.0231246	28.466	1	K	GSVVQFKIKRHTPLSKLMKAYCERQGLSMRQ	X;X;X;X;X;X;X;X;X;X;X;X;X;X;X;Acetyl (K);X;X;X;X;X;X;X;X;X;X;X;X;X;X;X	XXXXXXXXXXPPPPPPPPPXXXXXXXXXXXX	HTPLSK(1)LMK	6	2	-1.9355		11947;11948	11948	74732	0	0	0	0	54039
P61979	163	P61979	P61979	sp|P61979|HNRPK_MOUSE Heterogeneous nuclear ribonucleoprotein K OS=Mus musculus OX=10090 GN=Hnrnpk PE=1 SV=1	1	0.00913892	44.496	1	K	RLLIHQSLAGGIIGVKGAKIKELRENTQTTI	X;X;X;X;X;X;X;X;X;X;X;X;X;X;X;Acetyl (K);X;X;X;X;X;X;X;X;X;X;X;X;X;X;X	XPPPPPPPPPPPPPPPPPPXXXXXXXXXXXX	LLIHQSLAGGIIGVK(1)GAK	15	2	-0.46046		17591	17591	3646.3	0	0	0	0	0
P61982	152	P61982	P61982	sp|P61982|1433G_MOUSE 14-3-3 protein gamma OS=Mus musculus OX=10090 GN=Ywhag PE=1 SV=2	1	1.80452e-10	119.12	1	K	VATGEKRATVVESSEKAYSEAHEISKEHMQP	X;X;X;X;X;X;X;X;X;X;X;X;X;X;X;Acetyl (K);X;X;X;X;X;X;X;X;X;X;X;X;X;X;X	XXXXXXXPPPPPPPPPPPPPPPPPPPXXXXX	ATVVESSEK(1)AYSEAHEISK	9	2	-1.3421		2593;2594;2595	2595	24763	19844	10282	0	0	0
P61982	69	P61982	P61982	sp|P61982|1433G_MOUSE 14-3-3 protein gamma OS=Mus musculus OX=10090 GN=Ywhag PE=1 SV=2	1	4.59156e-19	162.67	1	K	GARRSSWRVISSIEQKTSADGNEKKIEMVRA	X;X;X;X;X;X;X;X;X;X;X;X;X;X;X;Acetyl (K);X;X;X;X;X;X;X;X;X;X;X;X;X;X;X	XXXXXXXXPPPPPPPPPPPPPPPPXXXXXXX	VISSIEQK(1)TSADGNEK	8	2	-1.1625		36641;36642;36643	36643	10889	8303.9	5213.7	0	0	0
P62073	57	P62073	P62073	sp|P62073|TIM10_MOUSE Mitochondrial import inner membrane translocase subunit Tim10 OS=Mus musculus OX=10090 GN=Timm10 PE=1 SV=1	1	0.000164379	88.218	1	K	ELSKGESVCLDRCVSKYLDIHERMGKKLTEL	X;X;X;X;X;X;X;X;X;X;X;X;X;X;X;Acetyl (K);X;X;X;X;X;X;X;X;X;X;X;X;X;X;X	XXXXXXXXXXXXPPPPPPPPPPPXXXXXXXX	CVSK(1)YLDIHER	4	2	-1.2326		3290;3291	3291	11414	9987.3	0	0	0	0
P62141;P62137;P63087	140;141;141	P62141	P62141	sp|P62141|PP1B_MOUSE Serine/threonine-protein phosphatase PP1-beta catalytic subunit OS=Mus musculus OX=10090 GN=Ppp1cb PE=1 SV=3;sp|P62137|PP1A_MOUSE Serine/threonine-protein phosphatase PP1-alpha catalytic subunit OS=Mus musculus OX=10090 GN=Ppp1ca PE=1	1	0.0259139	49.488	1	K	ECASINRIYGFYDECKRRFNIKLWKTFTDCF	X;X;X;X;X;X;X;X;X;X;X;X;X;X;X;Acetyl (K);X;X;X;X;X;X;X;X;X;X;X;X;X;X;X	XXXXXXXPPPPPPPPPPXXXXXXXXXXXXXX	IYGFYDECK(1)R	9	2	0.69635		14714;14715	14715	0	5664.8	4919.7	0	0	0
P62242	128	P62242	P62242	sp|P62242|RS8_MOUSE 40S ribosomal protein S8 OS=Mus musculus OX=10090 GN=Rps8 PE=1 SV=2	1	0.0376116	44.937	1	K	YESHYALPLGRKKGAKLTPEEEEILNKKRSK	X;X;X;X;X;X;X;X;X;X;X;X;X;X;X;Acetyl (K);X;X;X;X;X;X;X;X;X;X;X;X;X;X;X	XXXXXXXXXXXXXPPPPPPPPPPPPPPXXXX	GAK(1)LTPEEEEILNK	3	2	-2.7352		7487	7487	12230	0	0	0	0	0
P62259	28	P62259	P62259	sp|P62259|1433E_MOUSE 14-3-3 protein epsilon OS=Mus musculus OX=10090 GN=Ywhae PE=1 SV=1	1	0.0206279	56.088	1	K	LAEQAERYDEMVESMKKVAGMDVELTVEERN	X;X;X;X;X;X;X;X;X;X;X;X;X;X;X;Acetyl (K);X;X;X;X;X;X;X;X;X;X;X;X;X;X;X	XXXXXXXPPPPPPPPPPXXXXXXXXXXXXXX	YDEMVESMK(1)K	9	2	0.99898		38901	38901	5530.2	0	0	0	0	0
P62281	45	P62281	P62281	sp|P62281|RS11_MOUSE 40S ribosomal protein S11 OS=Mus musculus OX=10090 GN=Rps11 PE=1 SV=3	1	0.0181484	29.528	1	K	KEKLPRYYKNIGLGFKTPKEAIEGTYIDKKC	X;X;X;X;X;X;X;X;X;X;X;X;X;X;X;Acetyl (K);X;X;X;X;X;X;X;X;X;X;X;X;X;X;X	XXXXXXXXXPPPPPPPPPPXXXXXXXXXXXX	NIGLGFK(1)TPK	7	2	-1.931		21030;21031	21031	0	33395	48661	0	0	0
P62631	244	P62631	P62631	sp|P62631|EF1A2_MOUSE Elongation factor 1-alpha 2 OS=Mus musculus OX=10090 GN=Eef1a2 PE=1 SV=1	1	0.000103523	47.641	1	K	LEALDTILPPTRPTDKPLRLPLQDVYKIGGI	X;X;X;X;X;X;X;X;X;X;X;X;X;X;X;Acetyl (K);X;X;X;X;X;X;X;X;X;X;X;X;X;X;X	PPPPPPPPPPPPPPPPPPPXXXXXXXXXXXX	EGNASGVSLLEALDTILPPTRPTDK(1)PLR	25	3	-0.22766		4721	4721	0	0	0	0	7428.9	0
P62631	392	P62631	P62631	sp|P62631|EF1A2_MOUSE Elongation factor 1-alpha 2 OS=Mus musculus OX=10090 GN=Eef1a2 PE=1 SV=1	1	0.00184581	65.434	1	K	EKIDRRSGKKLEDNPKSLKSGDAAIVEMVPG	X;X;X;X;X;X;X;X;X;X;X;X;X;X;X;Acetyl (K);X;X;Acetyl (K);X;X;X;X;X;X;X;X;X;X;X;X	XXXXXXXXXPPPPPPPPPPXXXXXXXXXXXX	LEDNPK(1)SLK	6	2	0.18716		15105;15106;15834;15835	15835	24834	30179	0	0	0	0
P62631	395	P62631	P62631	sp|P62631|EF1A2_MOUSE Elongation factor 1-alpha 2 OS=Mus musculus OX=10090 GN=Eef1a2 PE=1 SV=1	1	4.44393e-14	108.66	1	K	DRRSGKKLEDNPKSLKSGDAAIVEMVPGKPM	X;X;X;X;X;X;X;X;X;X;X;X;X;X;X;Acetyl (K);X;X;X;X;X;X;X;X;X;X;X;X;X;X;X	XXXXXXXXXXXXXPPPPPPPPPPPPPPPPXX	SLK(1)SGDAAIVEMVPGK	3	2	-1.4449		26142;26143;26144;26145;26146;26147	26147	21424	29005	19469	18545	20549	13613
P62631	165	P62631	P62631	sp|P62631|EF1A2_MOUSE Elongation factor 1-alpha 2 OS=Mus musculus OX=10090 GN=Eef1a2 PE=1 SV=1	1	1.69997e-09	159.45	1	K	VGVNKMDSTEPAYSEKRYDEIVKEVSAYIKK	X;X;X;X;X;X;X;X;X;X;X;X;X;X;X;Acetyl (K);X;X;X;X;X;X;X;X;X;X;X;X;X;X;X	XXXXXPPPPPPPPPPPPXXXXXXXXXXXXXX	MDSTEPAYSEK(1)R	11	2	-1.5636		19605;19606;19607;19608;19609;19610	19610	169900	126190	127970	94249	109230	96375
P62806	9	P62806	P62806	sp|P62806|H4_MOUSE Histone H4 OS=Mus musculus OX=10090 GN=H4c1 PE=1 SV=2	1	0.0297037	37.907	2	K	_______MSGRGKGGKGLGKGGAKRHRKVLR	X;X;X;X;X;X;X;X;X;X;X;X;Acetyl (K);X;X;Acetyl (K);X;X;X;Acetyl (K);X;X;X;Acetyl (K);X;X;X;X;X;X;X	XXXXXXXXXXXPPPPPPPPPPPPPXXXXXXX	GK(1)GGK(1)GLGK	5	2	-0.63762		8054;8522	8522	0	0	0	0	126010	0
P62806	13	P62806	P62806	sp|P62806|H4_MOUSE Histone H4 OS=Mus musculus OX=10090 GN=H4c1 PE=1 SV=2	1	0.0250401	60.286	2	K	___MSGRGKGGKGLGKGGAKRHRKVLRDNIQ	X;X;X;X;X;X;X;X;X;X;X;Acetyl (K);X;X;X;Acetyl (K);X;X;X;Acetyl (K);X;X;X;X;X;X;X;X;X;X;X	XXXXXXXXXPPPPPPPPPPPPXXXXXXXXXX	GLGK(1)GGAK(1)R	4	2	-2.8511		8054;8709;8710	8710	0	0	7705200	0	7232200	0
P62806	17	P62806	P62806	sp|P62806|H4_MOUSE Histone H4 OS=Mus musculus OX=10090 GN=H4c1 PE=1 SV=2	1	0.0250401	60.286	2	K	SGRGKGGKGLGKGGAKRHRKVLRDNIQGITK	X;X;X;X;Acetyl (K);X;X;Acetyl (K);X;X;X;Acetyl (K);X;X;X;Acetyl (K);X;X;X;X;X;X;X;X;X;X;X;X;X;X;X	XXXXXXXXPPPPPPPPPXXXXXXXXXXXXXX	GLGK(1)GGAK(1)R	8	2	-2.8511		8709;8710	8710	0	0	7705200	0	7232200	0
P62806	92	P62806	P62806	sp|P62806|H4_MOUSE Histone H4 OS=Mus musculus OX=10090 GN=H4c1 PE=1 SV=2	1	6.07123e-06	115.81	1	K	AKRKTVTAMDVVYALKRQGRTLYGFGG____	X;X;X;X;X;X;X;X;Oxidation (M);X;X;X;X;X;X;Acetyl (K);X;X;X;X;X;X;X;X;X;X;X;X;X;X;X	XXXXPPPPPPPPPPPPPXXXXXXXXXXXXXX	TVTAMDVVYALK(1)R	12	2	1.1741		34521	34521	7608.1	0	0	0	0	0
P62821	187	P62821	P62821	sp|P62821|RAB1A_MOUSE Ras-related protein Rab-1A OS=Mus musculus OX=10090 GN=Rab1A PE=1 SV=3	1	8.03791e-06	93.571	1	K	IKKRMGPGATAGGAEKSNVKIQSTPVKQSGG	X;X;X;X;X;X;X;X;X;X;X;X;X;X;X;Acetyl (K);X;X;X;Acetyl (K);X;X;X;X;X;X;X;X;X;X;X	XXXXPPPPPPPPPPPPPPPPXXXXXXXXXXX	MGPGATAGGAEK(1)SNVK	12	2	-0.48143		19890	19890	28086	0	0	0	0	0
P62821	191	P62821	P62821	sp|P62821|RAB1A_MOUSE Ras-related protein Rab-1A OS=Mus musculus OX=10090 GN=Rab1A PE=1 SV=3	1	0.00536433	47.142	1	K	MGPGATAGGAEKSNVKIQSTPVKQSGGGCC_	X;X;X;X;X;X;X;X;X;X;X;X;X;X;X;Acetyl (K);X;X;X;X;X;X;X;X;X;X;X;X;X;X;X	XXXXXXXXXXXXPPPPPPPPPPPXXXXXXXX	SNVK(1)IQSTPVK	4	2	-0.15302		26576	26576	12749	0	0	0	0	0
P62821;Q9D1G1	61;58	P62821;Q9D1G1	P62821	sp|P62821|RAB1A_MOUSE Ras-related protein Rab-1A OS=Mus musculus OX=10090 GN=Rab1A PE=1 SV=3;sp|Q9D1G1|RAB1B_MOUSE Ras-related protein Rab-1B OS=Mus musculus OX=10090 GN=Rab1b PE=1 SV=1	1	5.72578e-16	134.11	1	K	VDFKIRTIELDGKTIKLQIWDTAGQERFRTI	X;X;X;X;X;X;X;X;X;X;X;X;X;X;X;Acetyl (K);X;X;X;X;X;X;X;X;X;X;X;X;X;X;X	XXXXXXXXXXXXXPPPPPPPPPPPPPPXXXX	TIK(1)LQIWDTAGQER	3	2	-1.973		30872;30873;30874;30875;30876;30877	30877	23406	24594	54004	20484	24702	21198
P62827;Q61820	71;71	P62827	P62827	sp|P62827|RAN_MOUSE GTP-binding nuclear protein Ran OS=Mus musculus OX=10090 GN=Ran PE=1 SV=3;sp|Q61820|RANT_MOUSE GTP-binding nuclear protein Ran, testis-specific isoform OS=Mus musculus OX=10090 GN=Rasl2-9 PE=2 SV=1	1	0.000142809	58.111	1	K	RGPIKFNVWDTAGQEKFGGLRDGYYIQAQCA	X;X;X;X;X;X;X;X;X;X;X;X;X;X;X;Acetyl (K);X;X;X;X;X;X;X;X;X;X;X;X;X;X;X	XXXXXPPPPPPPPPPPPPPPPXXXXXXXXXX	FNVWDTAGQEK(1)FGGLR	11	2	-0.82862		6906	6906	0	2007.6	0	0	0	0
P62827	99	P62827	P62827	sp|P62827|RAN_MOUSE GTP-binding nuclear protein Ran OS=Mus musculus OX=10090 GN=Ran PE=1 SV=3	1	0.000472862	96.841	1	K	QCAIIMFDVTSRVTYKNVPNWHRDLVRVCEN	X;X;X;X;X;X;X;X;X;X;X;X;X;X;X;Acetyl (K);X;X;X;X;X;X;X;X;X;X;X;X;X;X;X	XXXXXXXXXXXXPPPPPPPPPPPXXXXXXXX	VTYK(1)NVPNWHR	4	2	-0.085735		37791;37792;37793;37794;37795;37796	37796	51264	52492	38002	42066	40584	36823
P62862	51	P62862	P62862	sp|P62862|RS30_MOUSE 40S ribosomal protein S30 OS=Mus musculus OX=10090 GN=Fau PE=1 SV=1	1	0.00179226	65.282	1	K	MQYNRRFVNVVPTFGKKKGPNANS_______	X;X;X;X;X;X;X;X;X;X;X;X;X;X;X;Acetyl (K);X;X;X;X;X;X;X;X;X;X;X;X;X;X;X	XXXXXXPPPPPPPPPPPXXXXXXXXXXXXXX	FVNVVPTFGK(1)K	10	2	-3.8003		7236;7237;7238;7239;7240;7241	7241	86998	64542	84873	77591	84639	151130
P62897	73	P62897	P62897	sp|P62897|CYC_MOUSE Cytochrome c, somatic OS=Mus musculus OX=10090 GN=Cycs PE=1 SV=2	1	7.62368e-48	164.19	1	K	ITWGEDTLMEYLENPKKYIPGTKMIFAGIKK	X;X;X;X;X;X;X;X;Oxidation (M);X;X;X;X;X;X;Acetyl (K);X;X;X;X;X;X;X;Oxidation (M);X;X;X;X;X;Acetyl (K);X	PPPPPPPPPPPPPPPPPXXXXXXXXXXXXXX	GITWGEDTLMEYLENPK(1)K	17	2	-3.2801		8441;8442;8443;8444;8445;8446;8447;8448	8448	0	19307	57951	14990	15846	13533
P62897;CON__P62894;P00015	87;87;87	P62897	P62897	sp|P62897|CYC_MOUSE Cytochrome c, somatic OS=Mus musculus OX=10090 GN=Cycs PE=1 SV=2;sp|P00015|CYC2_MOUSE Cytochrome c, testis-specific OS=Mus musculus OX=10090 GN=Cyct PE=1 SV=3	1	0.0164617	60.286	1	K	PKKYIPGTKMIFAGIKKKGERADLIAYLKKA	X;Acetyl (K);X;X;X;X;X;X;X;Oxidation (M);X;X;X;X;X;Acetyl (K);X;X;X;X;X;X;X;X;X;X;X;X;X;X;X	XXXXXXXXXPPPPPPPPXXXXXXXXXXXXXX	MIFAGIK(1)K	7	2	-1.3724		19973;19974;19975;19976;19977	19977	57287	0	177980	41949	50261	0
P62962	126	P62962	P62962	sp|P62962|PROF1_MOUSE Profilin-1 OS=Mus musculus OX=10090 GN=Pfn1 PE=1 SV=2	1	0.00597655	58.912	1	K	VLLMGKEGVHGGLINKKCYEMASHLRRSQY_	X;X;X;X;X;X;X;X;X;X;X;X;X;X;X;Acetyl (K);X;X;X;X;X;X;X;X;X;X;X;X;X;X;X	XXXXXXPPPPPPPPPPPXXXXXXXXXXXXXX	EGVHGGLINK(1)K	10	2	-1.7298		4779	4779	0	19322	0	0	0	0
P62984;P0CG50;P0CG49;P62983	6;6;6;6	P62984	P62984	sp|P62984|RL40_MOUSE Ubiquitin-60S ribosomal protein L40 OS=Mus musculus OX=10090 GN=Uba52 PE=1 SV=2;sp|P0CG50|UBC_MOUSE Polyubiquitin-C OS=Mus musculus OX=10090 GN=Ubc PE=1 SV=2;sp|P0CG49|UBB_MOUSE Polyubiquitin-B OS=Mus musculus OX=10090 GN=Ubb PE=2 SV=1	1	0.00423338	51.852	1	K	__________MQIFVKTLTGKTITLEVEPSD	X;X;X;X;X;X;X;X;X;X;X;X;X;X;X;Acetyl (K);X;X;X;X;X;X;X;X;X;X;X;X;X;X;X	XXXXXXXXXXPPPPPPPPPPPXXXXXXXXXX	MQIFVK(1)TLTGK	6	2	-0.96256		20303;20304	20304	108830	0	132940	0	0	0
P63017	319	P63017	P63017	sp|P63017|HSP7C_MOUSE Heat shock cognate 71 kDa protein OS=Mus musculus OX=10090 GN=Hspa8 PE=1 SV=1	1	0.0166381	51.065	1	K	ELNADLFRGTLDPVEKALRDAKLDKSQIHDI	X;X;X;X;X;X;X;X;X;X;X;X;X;X;X;Acetyl (K);X;X;X;X;X;X;X;X;Acetyl (K);X;X;X;X;X;X	XXXXXXXXPPPPPPPPPPPXXXXXXXXXXXX	GTLDPVEK(1)ALR	8	2	-1.4381		9488;9489;9490	9490	133240	0	0	67569	0	69587
P63017;P17156	187;188	P63017	P63017	sp|P63017|HSP7C_MOUSE Heat shock cognate 71 kDa protein OS=Mus musculus OX=10090 GN=Hspa8 PE=1 SV=1;sp|P17156|HSP72_MOUSE Heat shock-related 70 kDa protein 2 OS=Mus musculus OX=10090 GN=Hspa2 PE=1 SV=2	1	7.11228e-14	102.48	1	K	IINEPTAAAIAYGLDKKVGAERNVLIFDLGG	X;X;X;X;X;X;X;X;X;X;X;X;X;X;X;Acetyl (K);X;X;X;X;X;X;X;X;X;X;X;X;X;X;X	PPPPPPPPPPPPPPPPPXXXXXXXXXXXXXX	IINEPTAAAIAYGLDK(1)K	16	2	-1.7846		13416;13417;13418;13419;13420;13421	13421	61476	21401	50231	18267	41320	16239
P63017;P17156	348;351	P63017	P63017	sp|P63017|HSP7C_MOUSE Heat shock cognate 71 kDa protein OS=Mus musculus OX=10090 GN=Hspa8 PE=1 SV=1;sp|P17156|HSP72_MOUSE Heat shock-related 70 kDa protein 2 OS=Mus musculus OX=10090 GN=Hspa2 PE=1 SV=2	1	4.01508e-06	115.18	1	K	DIVLVGGSTRIPKIQKLLQDFFNGKELNKSI	X;X;X;X;X;X;X;X;X;X;X;X;X;X;X;Acetyl (K);X;X;X;X;X;X;X;X;X;X;X;X;X;X;X	XXXXXXXXXXXXXPPPPPPPPPPPPXXXXXX	IQK(1)LLQDFFNGK	3	2	-0.67898		14073;14074;14075;14076;14077	14077	56943	62308	60421	13848	39656	0
P63017	328	P63017	P63017	sp|P63017|HSP7C_MOUSE Heat shock cognate 71 kDa protein OS=Mus musculus OX=10090 GN=Hspa8 PE=1 SV=1	1	2.90968e-13	77.359	1	K	TLDPVEKALRDAKLDKSQIHDIVLVGGSTRI	X;X;X;X;X;X;Acetyl (K);X;X;X;X;X;X;X;X;Acetyl (K);X;X;X;X;X;X;X;X;X;X;X;X;X;X;X	XXXXXXXXXXXXXPPPPPPPPPPPPPPPPPX	LDK(1)SQIHDIVLVGGSTR	3	2	0.51079		15717;15718;15719;15720	15720	25672	0	17768	0	10856	6741.7
P63017	246	P63017	P63017	sp|P63017|HSP7C_MOUSE Heat shock cognate 71 kDa protein OS=Mus musculus OX=10090 GN=Hspa8 PE=1 SV=1	1	0.00185952	64.106	1	K	EDFDNRMVNHFIAEFKRKHKKDISENKRAVR	X;X;X;X;X;X;X;X;X;X;X;X;X;X;X;Acetyl (K);X;X;X;X;X;X;X;X;X;X;X;X;X;X;X	XXXXXXPPPPPPPPPPPXXXXXXXXXXXXXX	MVNHFIAEFK(1)R	10	2	1.6054		20551;20552;20553	20553	20108	0	24765	0	10089	0
P63017	589	P63017	P63017	sp|P63017|HSP7C_MOUSE Heat shock cognate 71 kDa protein OS=Mus musculus OX=10090 GN=Hspa8 PE=1 SV=1	1	1.68906e-23	173.14	1	K	CNEIISWLDKNQTAEKEEFEHQQKELEKVCN	X;X;X;X;X;X;X;X;X;X;X;X;X;X;X;Acetyl (K);X;X;X;X;X;X;X;X;X;X;X;X;X;X;X	XXXXXXXXXXPPPPPPPPPPPPPPXXXXXXX	NQTAEK(1)EEFEHQQK	6	2	-2.8853		21513;21514;21515;21516;21517;21518	21518	32712	21207	74377	20098	19288	17381
P63017	71	P63017	P63017	sp|P63017|HSP7C_MOUSE Heat shock cognate 71 kDa protein OS=Mus musculus OX=10090 GN=Hspa8 PE=1 SV=1	1	3.56895e-09	117.23	1	K	KNQVAMNPTNTVFDAKRLIGRRFDDAVVQSD	X;X;X;X;X;Oxidation (M);X;X;X;X;X;X;X;X;X;Acetyl (K);X;X;X;X;X;X;X;X;X;X;X;X;X;X;X	XPPPPPPPPPPPPPPPPXXXXXXXXXXXXXX	NQVAMNPTNTVFDAK(1)R	15	2	-3.6313		21531;21532;21533;21534	21534	46139	0	0	12487	10667	10053
P63024;P63044	70;83	P63024	P63024	sp|P63024|VAMP3_MOUSE Vesicle-associated membrane protein 3 OS=Mus musculus OX=10090 GN=Vamp3 PE=1 SV=1;sp|P63044|VAMP2_MOUSE Vesicle-associated membrane protein 2 OS=Mus musculus OX=10090 GN=Vamp2 PE=1 SV=2	1	9.75231e-30	196.56	1	K	DALQAGASQFETSAAKLKRKYWWKNCKMWAI	X;X;X;X;X;X;X;X;X;X;X;X;X;X;X;Acetyl (K);X;X;X;X;X;X;X;X;X;X;X;X;X;X;X	PPPPPPPPPPPPPPPPPPXXXXXXXXXXXXX	ADALQAGASQFETSAAK(1)LK	17	2	0.3398		428;429;430	430	34293	26446	2418.2	0	0	0
P63030	72	P63030	P63030	sp|P63030|MPC1_MOUSE Mitochondrial pyruvate carrier 1 OS=Mus musculus OX=10090 GN=Mpc1 PE=1 SV=1	1	0.00442654	73.05	1	K	FALCCYSLTFMRFAYKVQPRNWLLFACHVTN	X;X;X;X;X;X;X;X;X;X;X;X;X;X;X;Acetyl (K);X;X;X;X;X;X;X;X;X;X;X;X;X;X;X	XXXXXXXXXXXXPPPPPPPPXXXXXXXXXXX	FAYK(1)VQPR	4	2	-0.24398		5713;5714;5715;5716;5717;5718;5719;5720	5720	360380	334750	328420	0	308860	263940
P63038	473	P63038	P63038	sp|P63038|CH60_MOUSE 60 kDa heat shock protein, mitochondrial OS=Mus musculus OX=10090 GN=Hspd1 PE=1 SV=1	1	0.00536433	67.759	1	K	NEDQKIGIEIIKRALKIPAMTIAKNAGVEGS	X;X;X;X;Acetyl (K);X;X;X;X;X;X;Acetyl (K);X;X;X;Acetyl (K);X;X;X;Oxidation (M);X;X;X;X;X;X;X;X;X;X;X	XXXXXXXXXXXXXPPPPPPPPPPPXXXXXXX	ALK(1)IPAMTIAK	3	2	-0.51906		1594;1595;1596;1597;1598;1599;1600	1600	3543200	2766800	1760800	1310700	2431600	2263100
P63038	249	P63038	P63038	sp|P63038|CH60_MOUSE 60 kDa heat shock protein, mitochondrial OS=Mus musculus OX=10090 GN=Hspd1 PE=1 SV=1	1	1.8624e-05	108.69	1	K	GQKCEFQDAYVLLSEKKISSVQSIVPALEIA	X;X;X;X;X;X;X;X;X;X;X;X;X;X;X;Acetyl (K);X;X;X;X;X;X;X;X;X;X;X;X;X;X;X	XXXPPPPPPPPPPPPPPXXXXXXXXXXXXXX	CEFQDAYVLLSEK(1)K	13	2	1.8416		3061	3061	0	51295	0	0	0	0
P63038	455	P63038	P63038	sp|P63038|CH60_MOUSE 60 kDa heat shock protein, mitochondrial OS=Mus musculus OX=10090 GN=Hspd1 PE=1 SV=1	1	4.06617e-05	78.13	1	K	GGCALLRCIPALDSLKPANEDQKIGIEIIKR	X;X;X;X;X;X;X;X;X;X;X;X;X;X;X;Acetyl (K);X;X;X;X;X;X;Acetyl (K);X;X;X;X;X;X;Acetyl (K);X	XXXXXXXPPPPPPPPPPPPPPPPXXXXXXXX	CIPALDSLK(1)PANEDQK	9	2	-1.2122		3129;3130	3130	0	0	14832	0	16570	0
P63038	462	P63038	P63038	sp|P63038|CH60_MOUSE 60 kDa heat shock protein, mitochondrial OS=Mus musculus OX=10090 GN=Hspd1 PE=1 SV=1	1	5.37936e-08	134.42	1	K	CIPALDSLKPANEDQKIGIEIIKRALKIPAM	X;X;X;X;X;X;X;X;X;X;X;X;X;X;X;Acetyl (K);X;X;X;X;X;X;Acetyl (K);X;X;X;Acetyl (K);X;X;X;Oxidation (M)	PPPPPPPPPPPPPPPPPPPPPPPXXXXXXXX	PANEDQK(1)IGIEIIK	7	2	-2.8367		3131;3132;3133;21942;21943;21944;21945;21946	21946	58636	56105	0	61342	65531	71396
P63038	469	P63038	P63038	sp|P63038|CH60_MOUSE 60 kDa heat shock protein, mitochondrial OS=Mus musculus OX=10090 GN=Hspd1 PE=1 SV=1	1	0.000621369	49.924	1	K	LKPANEDQKIGIEIIKRALKIPAMTIAKNAG	X;Acetyl (K);X;X;X;X;X;X;X;X;X;X;X;X;X;Acetyl (K);X;X;X;Acetyl (K);X;X;X;Oxidation (M);X;X;X;X;X;X;X	XXXXXXXXXPPPPPPPPXXXXXXXXXXXXXX	IGIEIIK(1)R	7	2	-1.2221		13071;13072;13073;13074;13075;13076	13076	219320	203000	186820	188640	223180	195650
P63038	191	P63038	P63038	sp|P63038|CH60_MOUSE 60 kDa heat shock protein, mitochondrial OS=Mus musculus OX=10090 GN=Hspd1 PE=1 SV=1	1	1.10877e-14	77.325	1	K	ANGDKDIGNIISDAMKKVGRKGVITVKDGKT	X;X;X;X;X;X;X;X;X;X;X;X;X;X;Oxidation (M);Acetyl (K);X;X;X;X;X;X;X;X;X;X;Acetyl (K);X;X;X;X	XXXXXPPPPPPPPPPPPXXXXXXXXXXXXXX	DIGNIISDAMK(1)K	11	2	0.2963		3718;3719;3720;3721;3722;3723;3724;3725;3726	3726	234920	249120	293900	163060	213670	151680
P63038	364	P63038	P63038	sp|P63038|CH60_MOUSE 60 kDa heat shock protein, mitochondrial OS=Mus musculus OX=10090 GN=Hspd1 PE=1 SV=1	1	0.0142776	36.317	1	K	IVTKDDAMLLKGKGDKAHIEKRIQEITEQLD	X;X;X;X;X;X;X;X;X;X;X;X;X;X;X;Acetyl (K);X;X;X;X;X;X;X;X;X;X;X;X;X;X;X	XXXXXXXXXXXXXPPPPPPPPXXXXXXXXXX	GDK(1)AHIEK	3	2	-1.4311		7649;7650;7651;7652;7653	7653	122810	91374	79952	89134	0	77492
P63038	202	P63038	P63038	sp|P63038|CH60_MOUSE 60 kDa heat shock protein, mitochondrial OS=Mus musculus OX=10090 GN=Hspd1 PE=1 SV=1	1	0.00238333	78.857	1	K	SDAMKKVGRKGVITVKDGKTLNDELEIIEGM	X;X;X;Oxidation (M);Acetyl (K);X;X;X;X;X;X;X;X;X;X;Acetyl (K);X;X;X;X;X;X;X;X;X;X;X;X;X;X;Oxidation (M)	XXXXXXXXXPPPPPPPPPPXXXXXXXXXXXX	KGVITVK(1)DGK	7	2	-0.37615		15026;15027;15028;15029;15030;15031	15026	135610	99067	85489	92160	111410	90329
P63038	396	P63038	P63038	sp|P63038|CH60_MOUSE 60 kDa heat shock protein, mitochondrial OS=Mus musculus OX=10090 GN=Hspd1 PE=1 SV=1	1	3.40471e-06	94.997	1	K	TTSEYEKEKLNERLAKLSDGVAVLKVGGTSD	X;X;X;X;X;X;X;X;X;X;X;X;X;X;X;Acetyl (K);X;X;X;X;X;X;X;X;X;X;X;X;X;X;X	XXXXXXXXXXXXXPPPPPPPPPPPPXXXXXX	LAK(1)LSDGVAVLK	3	2	-1.7537		15410;15411;15412;15413;15414;15415;15416;15417;15418;15419;15420	15420	278900	130870	180250	102770	172240	160370
P63038	417	P63038	P63038	sp|P63038|CH60_MOUSE 60 kDa heat shock protein, mitochondrial OS=Mus musculus OX=10090 GN=Hspd1 PE=1 SV=1	1	7.08614e-15	157.49	1	K	AVLKVGGTSDVEVNEKKDRVTDALNATRAAV	X;X;X;X;X;X;X;X;X;X;X;X;X;X;X;Acetyl (K);X;X;X;X;X;X;X;X;X;X;X;X;X;X;X	XXXXPPPPPPPPPPPPPXXXXXXXXXXXXXX	VGGTSDVEVNEK(1)K	12	2	-2.8957		36179;36180;36181;36182;36183;36184	36184	147630	98981	43193	22496	59060	27877
P63038	301	P63038	P63038	sp|P63038|CH60_MOUSE 60 kDa heat shock protein, mitochondrial OS=Mus musculus OX=10090 GN=Hspd1 PE=1 SV=1	1	1.34061e-17	159.74	1	K	LVLNRLKVGLQVVAVKAPGFGDNRKNQLKDM	X;X;X;X;X;X;X;X;X;X;X;X;X;X;X;Acetyl (K);X;X;X;X;X;X;X;X;X;X;X;X;X;X;X	XXXXXXXPPPPPPPPPPPPPPPPPXXXXXXX	VGLQVVAVK(1)APGFGDNR	9	2	-0.90972		36224;36225;36226;36227;36228;36229	36229	172060	203480	141240	143990	175980	177800
P63073	162	P63073	P63073	sp|P63073|IF4E_MOUSE Eukaryotic translation initiation factor 4E OS=Mus musculus OX=10090 GN=Eif4e PE=1 SV=1	1	6.14862e-06	104.39	1	K	DDVCGAVVNVRAKGDKIAIWTTECENRDAVT	X;X;X;X;X;X;X;X;X;X;X;X;X;X;X;Acetyl (K);X;X;X;X;X;X;X;X;X;X;X;X;X;X;X	XXXXXXXXXXXXXPPPPPPPPPPPPPPXXXX	GDK(1)IAIWTTECENR	3	2	-2.2959		7654;7655	7655	6853.4	5934.9	0	0	0	0
P63101;O70456	11;11	P63101	P63101	sp|P63101|1433Z_MOUSE 14-3-3 protein zeta/delta OS=Mus musculus OX=10090 GN=Ywhaz PE=1 SV=1;sp|O70456|1433S_MOUSE 14-3-3 protein sigma OS=Mus musculus OX=10090 GN=Sfn PE=1 SV=2	1	0.00772812	47.926	1	K	_____MDKNELVQKAKLAEQAERYDDMAACM	X;X;X;X;X;X;X;X;X;X;X;X;X;X;X;Acetyl (K);X;X;X;X;X;X;X;X;X;X;X;X;X;X;X	XXXXXXXXXXXXXXPPPPPPPPPXXXXXXXX	AK(1)LAEQAER	2	2	-1.337		1394;1395;1396;1397	1397	25559	23916	18871	0	20140	0
P63101	9	P63101	P63101	sp|P63101|1433Z_MOUSE 14-3-3 protein zeta/delta OS=Mus musculus OX=10090 GN=Ywhaz PE=1 SV=1	1	1.45601e-05	110.16	1	K	_______MDKNELVQKAKLAEQAERYDDMAA	X;X;X;X;X;X;X;X;X;X;X;X;X;X;X;Acetyl (K);X;Acetyl (K);X;X;X;X;X;X;X;X;X;X;X;X;X	XXXXXXXPPPPPPPPPPPXXXXXXXXXXXXX	MDKNELVQK(1)AK	9	2	-1.6854		19584;19585;19586	19584	9882.8	0	11676	0	6222.6	0
P63101	138	P63101	P63101	sp|P63101|1433Z_MOUSE 14-3-3 protein zeta/delta OS=Mus musculus OX=10090 GN=Ywhaz PE=1 SV=1	1	0.00891689	67.341	1	K	GDYYRYLAEVAAGDDKKGIVDQSQQAYQEAF	X;X;X;X;X;X;X;X;X;X;X;X;X;X;X;Acetyl (K);X;X;X;X;X;X;X;X;X;X;X;X;X;X;X	XXXXXPPPPPPPPPPPPXXXXXXXXXXXXXX	YLAEVAAGDDK(1)K	11	2	-0.65602		39510;39511	39511	13574	0	10483	0	0	0
P63242;Q8BGY2	47;47	P63242	P63242	sp|P63242|IF5A1_MOUSE Eukaryotic translation initiation factor 5A-1 OS=Mus musculus OX=10090 GN=Eif5a PE=1 SV=2;sp|Q8BGY2|IF5A2_MOUSE Eukaryotic translation initiation factor 5A-2 OS=Mus musculus OX=10090 GN=Eif5a2 PE=1 SV=3	1	0.000422204	93.347	1	K	VLKGRPCKIVEMSTSKTGKHGHAKVHLVGID	X;X;X;X;X;X;X;X;X;X;X;X;X;X;X;Acetyl (K);X;X;X;X;X;X;X;X;X;X;X;X;X;X;X	XXXXXXXXPPPPPPPPPPPXXXXXXXXXXXX	IVEMSTSK(1)TGK	8	2	-0.7285		14496;14497;14498;14499;14500;14501	14501	178850	193680	196550	269920	219870	217880
P63254	22	P63254	P63254	sp|P63254|CRIP1_MOUSE Cysteine-rich protein 1 OS=Mus musculus OX=10090 GN=Crip1 PE=1 SV=2	1	0.00707378	70.815	1	K	CDKEVYFAERVTSLGKDWHRPCLKCEKCGKT	X;X;X;X;X;X;X;X;X;X;X;X;X;X;X;Acetyl (K);X;X;X;X;X;X;X;X;X;X;X;X;X;X;X	XXXXXXXXXXPPPPPPPPPPXXXXXXXXXXX	VTSLGK(1)DWHR	6	2	0.97739		37743;37744;37745;37746;37747;37748	37748	20678	27121	15593	21183	18254	18578
P67778	186	P67778	P67778	sp|P67778|PHB_MOUSE Prohibitin OS=Mus musculus OX=10090 GN=Phb PE=1 SV=1	1	7.49553e-24	179.65	1	K	THLTFGKEFTEAVEAKQVAQQEAERARFVVE	X;X;X;X;X;X;X;X;X;X;X;X;X;X;X;Acetyl (K);X;X;X;X;X;X;X;X;X;X;X;X;X;X;X	XXXXXXXPPPPPPPPPPPPPPPPPPXXXXXX	EFTEAVEAK(1)QVAQQEAER	9	2	-0.53558		4689;4690;4691;4692	4692	3753.1	4655.8	6962.9	0	3718.2	0
P67778	202	P67778	P67778	sp|P67778|PHB_MOUSE Prohibitin OS=Mus musculus OX=10090 GN=Phb PE=1 SV=1	1	2.55788e-08	142.85	1	K	QVAQQEAERARFVVEKAEQQKKAAIISAEGD	X;X;X;X;X;X;X;X;X;X;X;X;X;X;X;Acetyl (K);X;X;X;X;X;X;X;X;X;X;X;X;X;X;X	XXXXXXXXXXXPPPPPPPPPPXXXXXXXXXX	FVVEK(1)AEQQK	5	2	-2.0397		7263;7264;7265;7266;7267;7268	7268	350230	249230	276640	243390	260710	255800
P67778	128	P67778	P67778	sp|P67778|PHB_MOUSE Prohibitin OS=Mus musculus OX=10090 GN=Phb PE=1 SV=1	1	2.21699e-05	96.721	1	K	DYDERVLPSITTEILKSVVARFDAGELITQR	X;X;X;X;X;X;X;X;X;X;X;X;X;X;X;Acetyl (K);X;X;X;X;X;X;X;X;X;X;X;X;X;X;X	XXXXXPPPPPPPPPPPPPPPPXXXXXXXXXX	VLPSITTEILK(1)SVVAR	11	2	-0.54608		36939;36940;36941	36941	5243.9	5785.5	23316	0	0	0
P68254;Q9CQV8	11;13	P68254;Q9CQV8		sp|P68254|1433T_MOUSE 14-3-3 protein theta OS=Mus musculus OX=10090 GN=Ywhaq PE=1 SV=1;sp|Q9CQV8|1433B_MOUSE 14-3-3 protein beta/alpha OS=Mus musculus OX=10090 GN=Ywhab PE=1 SV=3	1	0.00772812	47.926	1	K	_____MEKTELIQKAKLAEQAERYDDMATCM;___MTMDKSELVQKAKLAEQAERYDDMAAAM	X;X;X;X;X;X;X;X;X;X;X;X;X;X;X;Acetyl (K);X;X;X;X;X;X;X;X;X;X;X;X;X;X;X	XXXXXXXXXXXXXXPPPPPPPPPXXXXXXXX	AK(1)LAEQAER	2	2	-1.337		1394;1395;1396;1397	1397	25559	23916	18871	0	20140	0
P68368	336	P68368	P68368	sp|P68368|TBA4A_MOUSE Tubulin alpha-4A chain OS=Mus musculus OX=10090 GN=Tuba4a PE=1 SV=1	1	0.0049001	52.523	1	K	GDVVPKDVNAAIAAIKTKRSIQFVDWCPTGF	X;X;X;X;X;X;X;X;X;X;X;X;X;X;X;Acetyl (K);X;X;X;X;X;X;X;X;X;X;X;X;X;X;X	XXXXXXPPPPPPPPPPPPXXXXXXXXXXXXX	DVNAAIAAIK(1)TK	10	2	-0.81701		4193;4194;4195	4195	26991	0	15157	0	16305	0
P68372	58	P68372	P68372	sp|P68372|TBB4B_MOUSE Tubulin beta-4B chain OS=Mus musculus OX=10090 GN=Tubb4b PE=1 SV=1	1	3.98195e-34	196.18	1	K	QLERINVYYNEATGGKYVPRAVLVDLEPGTM	X;X;X;X;X;X;X;X;X;X;X;X;X;X;X;Acetyl (K);X;X;X;X;X;X;X;X;X;X;X;X;X;X;X	XXXXPPPPPPPPPPPPPPPPXXXXXXXXXXX	INVYYNEATGGK(1)YVPR	12	2	-1.7744		13917;13918;13919;13920;13921;13922	13922	58386	53710	48262	44840	44026	41437
P68433;P84244;P84228	19;19;19	P68433	P68433	sp|P68433|H31_MOUSE Histone H3.1 OS=Mus musculus OX=10090 GN=H3c1 PE=1 SV=2;sp|P84244|H33_MOUSE Histone H3.3 OS=Mus musculus OX=10090 GN=H3-3a PE=1 SV=2;sp|P84228|H32_MOUSE Histone H3.2 OS=Mus musculus OX=10090 GN=H3c2 PE=1 SV=2	1	2.00909e-14	136.39	2	K	TKQTARKSTGGKAPRKQLATKAARKSAPATG	X;X;X;X;X;X;Acetyl (K);X;X;X;X;Acetyl (K);X;X;X;Acetyl (K);X;X;X;X;Acetyl (K);X;X;X;X;X;X;X;X;X;X	XXXXXXXXXXXXXXXPPPPPPPPPXXXXXXX	K(1)QLATK(1)AAR	1	2	-0.20127		15189;15190;15191;15192;15193;15194	15194	2706700	1891200	2700200	1881900	1981200	1889800
P68433;P84244;P84228	24;24;24	P68433	P68433	sp|P68433|H31_MOUSE Histone H3.1 OS=Mus musculus OX=10090 GN=H3c1 PE=1 SV=2;sp|P84244|H33_MOUSE Histone H3.3 OS=Mus musculus OX=10090 GN=H3-3a PE=1 SV=2;sp|P84228|H32_MOUSE Histone H3.2 OS=Mus musculus OX=10090 GN=H3c2 PE=1 SV=2	1	5.87719e-21	136.39	1;2	K	RKSTGGKAPRKQLATKAARKSAPATGGVKKP	X;Acetyl (K);X;X;X;X;Acetyl (K);X;X;X;Acetyl (K);X;X;X;X;Acetyl (K);X;X;X;X;X;X;X;X;X;X;X;X;X;X;X	XXXXXXXXXXPPPPPPPPPXXXXXXXXXXXX	QLATK(1)AAR	5	2	-0.18027		15189;15190;15191;15192;15193;15194;15195;15196;15197;23653;23654;23655;23656;23657;23658	23658	7702400	5304000	7363400	5693100	5627200	5383400
P68433;P84244;P84228;P02301	10;10;10;10	P68433	P68433	sp|P68433|H31_MOUSE Histone H3.1 OS=Mus musculus OX=10090 GN=H3c1 PE=1 SV=2;sp|P84244|H33_MOUSE Histone H3.3 OS=Mus musculus OX=10090 GN=H3-3a PE=1 SV=2;sp|P84228|H32_MOUSE Histone H3.2 OS=Mus musculus OX=10090 GN=H3c2 PE=1 SV=2;sp|P02301|H3C_MOUSE Histone	1	4.5317e-05	105.86	2	K	______MARTKQTARKSTGGKAPRKQLATKA	X;X;X;X;X;X;X;X;X;X;X;X;X;X;X;Acetyl (K);X;X;X;X;Acetyl (K);X;X;X;Acetyl (K);X;X;X;X;Acetyl (K);X	XXXXXXXXXXXXXXXPPPPPPPPPXXXXXXX	K(1)STGGK(1)APR	1	2	-1.4975		15212;15213;15214;15215;15216;15217	15217	1033400	533730	869800	658140	673470	494600
P68433;P84244;P84228;P02301	15;15;15;15	P68433	P68433	sp|P68433|H31_MOUSE Histone H3.1 OS=Mus musculus OX=10090 GN=H3c1 PE=1 SV=2;sp|P84244|H33_MOUSE Histone H3.3 OS=Mus musculus OX=10090 GN=H3-3a PE=1 SV=2;sp|P84228|H32_MOUSE Histone H3.2 OS=Mus musculus OX=10090 GN=H3c2 PE=1 SV=2;sp|P02301|H3C_MOUSE Histone	1	4.5317e-05	105.86	2	K	_MARTKQTARKSTGGKAPRKQLATKAARKSA	X;X;X;X;X;X;X;X;X;X;Acetyl (K);X;X;X;X;Acetyl (K);X;X;X;Acetyl (K);X;X;X;X;Acetyl (K);X;X;X;X;X;X	XXXXXXXXXXPPPPPPPPPXXXXXXXXXXXX	K(1)STGGK(1)APR	6	2	-1.4975		15212;15213;15214;15215;15216;15217	15217	1033400	533730	869800	658140	673470	494600
P70349	21	P70349	P70349	sp|P70349|HINT1_MOUSE Adenosine 5'-monophosphoramidase HINT1 OS=Mus musculus OX=10090 GN=Hint1 PE=1 SV=3	1	1.74826e-16	134.23	1	K	AKAQVAQPGGDTIFGKIIRKEIPAKIIFEDD	X;X;X;X;X;X;X;X;X;X;X;X;X;X;X;Acetyl (K);X;X;X;X;X;X;X;X;X;X;X;X;X;X;X	XXPPPPPPPPPPPPPPPPPXXXXXXXXXXXX	AQVAQPGGDTIFGK(1)IIR	14	2	0.53007		2189;2190;2191	2191	22178	18763	5516	0	0	0
P70349	91	P70349	P70349	sp|P70349|HINT1_MOUSE Adenosine 5'-monophosphoramidase HINT1 OS=Mus musculus OX=10090 GN=Hint1 PE=1 SV=3	1	0.0358395	27.07	1	K	HLMIVGKKCAADLGLKRGYRMVVNEGADGGQ	X;X;X;X;X;X;X;X;X;X;X;X;X;X;X;Acetyl (K);X;X;X;X;X;X;X;X;X;X;X;X;X;X;X	XXXXXXXXPPPPPPPPPXXXXXXXXXXXXXX	CAADLGLK(1)R	8	2	0.36944		2999	2999	27523	0	0	0	0	0
P70404	226	P70404	P70404	sp|P70404|IDHG1_MOUSE Isocitrate dehydrogenase [NAD] subunit gamma 1, mitochondrial OS=Mus musculus OX=10090 GN=Idh3g PE=1 SV=1	1	8.60648e-26	154.09	1	K	SGRKKVTAVHKANIMKLGDGLFLQCCREVAA	X;X;X;X;X;X;X;X;X;X;X;X;X;X;X;Acetyl (K);X;X;X;X;X;X;X;X;X;X;X;X;X;X;X	XXXXXXXXXXXPPPPPPPPPPPPPPPPXXXX	ANIMK(1)LGDGLFLQCCR	5	2	-0.11016		1975;1976;1977;1978;1979	1979	68316	67196	0	6963.7	39361	26491
P70404	206	P70404	P70404	sp|P70404|IDHG1_MOUSE Isocitrate dehydrogenase [NAD] subunit gamma 1, mitochondrial OS=Mus musculus OX=10090 GN=Idh3g PE=1 SV=1	1	0.01828	53.524	1	K	IITKAKSLRIAEYAFKLAQESGRKKVTAVHK	X;X;X;X;X;X;X;X;X;X;X;X;X;X;X;Acetyl (K);X;X;X;X;X;X;X;X;X;X;X;X;X;X;Acetyl (K)	XXXXXXXXXPPPPPPPPPPPPPPXXXXXXXX	IAEYAFK(1)LAQESGR	7	2	-1.7053		12534	12534	0	0	9515.9	0	0	0
P70404	221	P70404	P70404	sp|P70404|IDHG1_MOUSE Isocitrate dehydrogenase [NAD] subunit gamma 1, mitochondrial OS=Mus musculus OX=10090 GN=Idh3g PE=1 SV=1	1	0.00457168	48.308	1	K	KLAQESGRKKVTAVHKANIMKLGDGLFLQCC	Acetyl (K);X;X;X;X;X;X;X;X;X;X;X;X;X;X;Acetyl (K);X;X;X;X;Acetyl (K);X;X;X;X;X;X;X;X;X;X	XXXXXXXXXXPPPPPPPPPPPXXXXXXXXXX	VTAVHK(1)ANIMK	6	2	-3.3832		37601;37602;37603	37603	9905.6	0	9514.4	0	1644.9	0
P70665	251	P70665	P70665	sp|P70665|SIAE_MOUSE Sialate O-acetylesterase OS=Mus musculus OX=10090 GN=Siae PE=1 SV=3	1	0.0181484	38.427	1	K	GVPNTRDERVGQPEIKPMRNECNSEESSCPF	X;X;X;X;X;X;X;X;X;X;X;X;X;X;X;Acetyl (K);X;X;X;X;X;X;X;X;X;X;X;X;X;X;X	XXXXXXXXXPPPPPPPPPPXXXXXXXXXXXX	VGQPEIK(1)PMR	7	2	-1.2071		36246	36246	0	0	0	0	44836	0
P70670;Q60817	2114;142	P70670	P70670	sp|P70670|NACAM_MOUSE Nascent polypeptide-associated complex subunit alpha, muscle-specific form OS=Mus musculus OX=10090 GN=Naca PE=1 SV=2;sp|Q60817|NACA_MOUSE Nascent polypeptide-associated complex subunit alpha OS=Mus musculus OX=10090 GN=Naca PE=1 SV=1	1	5.64279e-19	154.53	1	K	KIEDLSQQAQLAAAEKFKVQGEAVSNIQENT	X;X;X;X;X;X;X;X;X;X;X;X;X;X;X;Acetyl (K);X;X;X;X;X;X;X;X;X;X;X;X;X;X;X	XPPPPPPPPPPPPPPPPPXXXXXXXXXXXXX	IEDLSQQAQLAAAEK(1)FK	15	2	-2.1813		12776;12777;12778;12779;12780;12781	12781	18047	15664	16620	8358.5	3842.1	5953.7
P80314	272	P80314	P80314	sp|P80314|TCPB_MOUSE T-complex protein 1 subunit beta OS=Mus musculus OX=10090 GN=Cct2 PE=1 SV=4	1	0.000335503	74.902	1	K	RVDSTAKVAEIEHAEKEKMKEKVERILKHGI	X;X;X;X;X;X;X;X;X;X;X;X;X;X;X;Acetyl (K);X;X;X;X;X;X;X;X;X;X;X;X;X;X;X	XXXXXXXPPPPPPPPPPPXXXXXXXXXXXXX	VAEIEHAEK(1)EK	9	2	-0.72654		35206;35207;35208;35209	35209	13658	4663.7	5802.5	0	6452.3	0
P80317	365	P80317	P80317	sp|P80317|TCPZ_MOUSE T-complex protein 1 subunit zeta OS=Mus musculus OX=10090 GN=Cct6a PE=1 SV=3	1	1.37946e-05	138.04	1	K	VYEYTLGEEKFTFIEKCNNPRSVTLLVKGPN	X;X;X;X;X;X;X;X;X;X;X;X;X;X;X;Acetyl (K);X;X;X;X;X;X;X;X;X;X;X;Acetyl (K);X;X;X	XXXXXXXXXXPPPPPPPPPPPXXXXXXXXXX	FTFIEK(1)CNNPR	6	2	2.6827		7121;7122;7123;7124;7125;7126	7126	11245	5236.4	10414	8071.5	9294.4	6711
P80317;Q61390	377;377	P80317	P80317	sp|P80317|TCPZ_MOUSE T-complex protein 1 subunit zeta OS=Mus musculus OX=10090 GN=Cct6a PE=1 SV=3;sp|Q61390|TCPW_MOUSE T-complex protein 1 subunit zeta-2 OS=Mus musculus OX=10090 GN=Cct6b PE=1 SV=4	1	0.000452296	98.25	1	K	FIEKCNNPRSVTLLVKGPNKHTLTQIKDAIR	X;X;X;Acetyl (K);X;X;X;X;X;X;X;X;X;X;X;Acetyl (K);X;X;X;X;X;X;X;X;X;X;X;X;X;X;X	XXXXXXXXXPPPPPPPPPPPXXXXXXXXXXX	SVTLLVK(1)GPNK	7	2	2.1021		27567;27568;27569;27570;27571	27571	27666	0	0	12559	20077	12512
P83870	3	P83870	P83870	sp|P83870|PHF5A_MOUSE PHD finger-like domain-containing protein 5A OS=Mus musculus OX=10090 GN=Phf5a PE=1 SV=1	1	0.00114994	53.728	1	K	_____________MAKHHPDLIFCRKQAGVA	X;X;X;X;X;X;X;X;X;X;X;X;X;X;X;Acetyl (K);X;X;X;X;X;X;X;X;X;X;X;X;X;X;X	XXXXXXXXXXXXXXPPPPPPPPPPPXXXXXX	AK(1)HHPDLIFCR	2	2	-0.95873		1381;1382;1383;1384;1385;1386	1386	14090	16126	17569	24515	10550	11234
P84099	80	P84099	P84099	sp|P84099|RL19_MOUSE 60S ribosomal protein L19 OS=Mus musculus OX=10090 GN=Rpl19 PE=1 SV=1	1	0.00267909	89.821	1	K	KNTLARRKGRHMGIGKRKGTANARMPEKVTW	X;X;X;X;X;X;X;X;X;X;X;X;X;X;X;Acetyl (K);X;X;X;X;X;X;X;X;X;X;X;X;X;X;X	XXXXXXXXXXPPPPPPPXXXXXXXXXXXXXX	HMGIGK(1)R	6	2	-2.906		11358;11359;11360;11361;11362	11362	64890	0	60880	50603	48771	78729
P85094	178	P85094	P85094	sp|P85094|ISC2A_MOUSE Isochorismatase domain-containing protein 2A OS=Mus musculus OX=10090 GN=Isoc2a PE=1 SV=1	1	0.00211232	60.896	1	K	SLILQLVRDASHPQFKEIQKIIKEPVPDSGL	X;X;X;X;X;X;X;X;X;X;X;X;X;X;X;Acetyl (K);X;X;X;X;X;X;X;X;X;X;X;X;X;X;X	XXXXXXXXPPPPPPPPPPPPXXXXXXXXXXX	DASHPQFK(1)EIQK	8	2	-1.4947		3367;3368;3369	3369	197220	0	161250	0	148520	0
P97315	84	P97315	P97315	sp|P97315|CSRP1_MOUSE Cysteine and glycine-rich protein 1 OS=Mus musculus OX=10090 GN=Csrp1 PE=1 SV=3	1	5.16562e-09	92.189	1	K	KGYGYGQGAGTLSTDKGESLGIKHEEAPGHR	X;X;X;X;X;X;X;X;X;X;X;X;X;X;X;Acetyl (K);X;X;X;X;X;X;X;X;X;X;X;X;X;X;X	XPPPPPPPPPPPPPPPPPPPPPPXXXXXXXX	GYGYGQGAGTLSTDK(1)GESLGIK	15	2	-2.9297		9875	9875	0	0	9397.1	0	0	0
P97443	330	P97443	P97443	sp|P97443|SMYD1_MOUSE Histone-lysine N-methyltransferase Smyd1 OS=Mus musculus OX=10090 GN=Smyd1 PE=1 SV=3	1	0.000220337	97.569	1	K	KIDKARSEGLYHEVVKLCRECLEKQEPVFAD	X;X;X;X;X;X;X;X;X;X;X;X;X;X;X;Acetyl (K);X;X;X;X;X;X;X;X;X;X;X;X;X;X;X	XXXXXXPPPPPPPPPPPPPXXXXXXXXXXXX	SEGLYHEVVK(1)LCR	10	2	0.81387		24870;24871;24872;24873;24874;24875	24875	26069	21455	29053	13093	24866	14581
P97447	4	P97447	P97447	sp|P97447|FHL1_MOUSE Four and a half LIM domains protein 1 OS=Mus musculus OX=10090 GN=Fhl1 PE=1 SV=3	1	0.00239779	76.4	1	K	____________MSEKFDCHYCRDPLQGKKY	X;X;X;X;X;X;X;X;X;X;X;X;X;X;X;Acetyl (K);X;X;X;X;X;X;X;X;X;X;X;X;X;X;X	XXXXXXXXXXXXXPPPPPPPPPPXXXXXXXX	SEK(1)FDCHYCR	3	2	-2.2974		24932;24933;24934	24934	8724.8	6489.4	6621.2	0	0	0
P97450	41	P97450	P97450	sp|P97450|ATP5J_MOUSE ATP synthase-coupling factor 6, mitochondrial OS=Mus musculus OX=10090 GN=Atp5pf PE=1 SV=1	1	2.47793e-31	151.71	1	K	GVTAVAFNKELDPVQKLFVDKIREYKSKRQA	X;X;X;X;X;X;X;X;X;X;X;X;X;X;X;Acetyl (K);X;X;X;X;Acetyl (K);X;X;X;X;X;X;X;X;X;X	XXXXXXXXXPPPPPPPPPPPPXXXXXXXXXX	ELDPVQK(1)LFVDK	7	2	1.4617		5024;5025;5026;5027;5028;5029	5029	3565200	3417200	3762100	2595200	3314200	3361000
P97450	46	P97450	P97450	sp|P97450|ATP5J_MOUSE ATP synthase-coupling factor 6, mitochondrial OS=Mus musculus OX=10090 GN=Atp5pf PE=1 SV=1	1	1.74097e-05	53.85	1	K	AFNKELDPVQKLFVDKIREYKSKRQASGGPV	X;X;X;X;X;X;X;X;X;X;X;X;X;X;X;Acetyl (K);X;X;X;X;X;X;X;X;X;X;X;X;X;X;X	XXXXXXXXXXXPPPPPPPXXXXXXXXXXXXX	LFVDK(1)IR	5	2	-2.364		16214;16215;16216;16217;16218;16219	16219	2624400	2708900	2602900	2517900	2936700	2870800
P97450	99	P97450	P97450	sp|P97450|ATP5J_MOUSE ATP synthase-coupling factor 6, mitochondrial OS=Mus musculus OX=10090 GN=Atp5pf PE=1 SV=1	1	1.04714e-22	195.54	1	K	KGEMDTFPTFKFDDPKFEVIDKPQS______	X;X;X;Oxidation (M);X;X;X;X;X;X;X;X;X;X;X;Acetyl (K);X;X;X;X;X;Acetyl (K);X;X;X;X;X;X;X;X;X	XXXXXXXXXXXPPPPPPPPPPPPPPXXXXXX	FDDPK(1)FEVIDK	5	2	-3.131		5804;5805;5806;5807;5808;5809;5810;5811;5812;5813;5814;5815;5816;5817;5818;5819;5820	5809	144670	117260	102480	166600	156170	144660
P97450	105	P97450	P97450	sp|P97450|ATP5J_MOUSE ATP synthase-coupling factor 6, mitochondrial OS=Mus musculus OX=10090 GN=Atp5pf PE=1 SV=1	1	0.000277233	111.28	1	K	FPTFKFDDPKFEVIDKPQS____________	X;X;X;X;Acetyl (K);X;X;X;X;X;X;X;X;X;X;Acetyl (K);X;X;X;X;X;X;X;X;X;X;X;X;X;X;X	XXXXXXXXXXPPPPPPPPPXXXXXXXXXXXX	FEVIDK(1)PQS	6	2	0.17725		5940;5941;5942;5943;5944;5945	5945	701770	0	463910	495440	0	552660
P97450	94	P97450	P97450	sp|P97450|ATP5J_MOUSE ATP synthase-coupling factor 6, mitochondrial OS=Mus musculus OX=10090 GN=Atp5pf PE=1 SV=1	1	1.67984e-54	238.12	1	K	KQMYGKGEMDTFPTFKFDDPKFEVIDKPQS_	X;X;X;X;X;X;X;X;Oxidation (M);X;X;X;X;X;X;Acetyl (K);X;X;X;X;Acetyl (K);X;X;X;X;X;Acetyl (K);X;X;X;X	XXXXXXPPPPPPPPPPPPPPPXXXXXXXXXX	GEMDTFPTFK(1)FDDPK	10	2	-1.403		7791;7792;7793;7794;7795;7796;7797;7798;7799;7800;7801;7802	7802	1378800	1225100	1083600	861870	1212100	1122200
P97478	91	P97478	P97478	sp|P97478|COQ7_MOUSE 5-demethoxyubiquinone hydroxylase, mitochondrial OS=Mus musculus OX=10090 GN=Coq7 PE=1 SV=3	1	2.88501e-08	107.25	1	K	RTSVGPVIQKMWDQEKNHLKKFNELMIAFRV	X;X;X;X;X;X;X;X;X;X;X;X;X;X;X;Acetyl (K);X;X;X;X;X;X;X;X;X;X;X;X;X;X;X	XXXXXXXXXXPPPPPPPPPPXXXXXXXXXXX	MWDQEK(1)NHLK	6	2	-0.12118		20592;20593;20594;20595;20596;20597	20597	204360	200600	181340	168040	174090	183810
P97478	85	P97478	P97478	sp|P97478|COQ7_MOUSE 5-demethoxyubiquinone hydroxylase, mitochondrial OS=Mus musculus OX=10090 GN=Coq7 PE=1 SV=3	1	3.08738e-06	69.345	1	K	QMAVLGRTSVGPVIQKMWDQEKNHLKKFNEL	X;X;X;X;X;X;X;X;X;X;X;X;X;X;X;Acetyl (K);X;X;X;X;X;Acetyl (K);X;X;X;X;X;X;X;X;X	XXXXXXXPPPPPPPPPPPPPPPXXXXXXXXX	TSVGPVIQK(1)MWDQEK	9	2	0.6909		33630	33630	10381	0	0	0	0	0
P97807	169	P97807	P97807	sp|P97807|FUMH_MOUSE Fumarate hydratase, mitochondrial OS=Mus musculus OX=10090 GN=Fh PE=1 SV=3	1	6.73725e-53	182.95	1	K	ISNRAIEMLGGELGSKKPVHPNDHVNKSQSS	X;X;X;X;X;X;X;Oxidation (M);X;X;X;X;X;X;X;Acetyl (K);X;X;X;X;X;X;X;X;X;X;Acetyl (K);X;X;X;X	XXXXPPPPPPPPPPPPPPPPPPPPPPPXXXX	AIEMLGGELGSK(1)K	12	2	-0.86228		1218;1219;1220;1221;1222;1223;1224;1225;1226;1227;1228;1229;1230;1231;1232;1233;1234;1235;1236;1237;1238;1239;1240	1231	1680000	1813300	1350100	1705800	1718100	1797500
P97807	170	P97807	P97807	sp|P97807|FUMH_MOUSE Fumarate hydratase, mitochondrial OS=Mus musculus OX=10090 GN=Fh PE=1 SV=3	0.5	0.00064673	42.994	1	K	SNRAIEMLGGELGSKKPVHPNDHVNKSQSSN	X;X;X;X;X;X;X;X;X;X;X;X;X;X;X;X;X;X;X;X;X;X;X;X;X;X;X;X;X;X;X	XXXXXXXXXXXXXXXXXXXXXXXXXXXXXXX	AIEMLGGELGSK(0.5)K(0.5)PVHPNDHVNK	13	3	-1.8647		1239;1240	1240	0	0	20682	16806	0	0
P97807	180	P97807	P97807	sp|P97807|FUMH_MOUSE Fumarate hydratase, mitochondrial OS=Mus musculus OX=10090 GN=Fh PE=1 SV=3	0.999637	2.40209e-12	73.419	1	K	ELGSKKPVHPNDHVNKSQSSNDTFPTAMHIA	X;X;X;X;Acetyl (K);X;X;X;X;X;X;X;X;X;X;Acetyl (K);X;X;X;X;X;X;X;X;X;X;X;X;X;X;X	XXXXXPPPPPPPPPPPPPPPPPPPPPPPPPP	KPVHPNDHVNK(1)SQSSNDTFPTAMHIAAAVEVHK	11	4	-0.31309		15187;15188	15187	0	0	90210	0	0	32889
P97807	227	P97807	P97807	sp|P97807|FUMH_MOUSE Fumarate hydratase, mitochondrial OS=Mus musculus OX=10090 GN=Fh PE=1 SV=3	1	7.57082e-09	96.184	1	K	HDALSAKSKEFAQVIKIGRTHTQDAVPLTLG	X;X;X;X;X;X;Acetyl (K);X;X;X;X;X;X;X;X;Acetyl (K);X;X;X;X;X;X;X;X;X;X;X;X;X;X;X	XXXXXXXXXPPPPPPPPPPXXXXXXXXXXXX	EFAQVIK(1)IGR	7	2	-1.727		4639;4640;4641	4641	0	51196	0	0	15537	7531
P97807	119	P97807	P97807	sp|P97807|FUMH_MOUSE Fumarate hydratase, mitochondrial OS=Mus musculus OX=10090 GN=Fh PE=1 SV=3	1	2.23693e-56	250.51	1	K	NQEYGLDPKIASAIMKAADEVAEGKLNDHFP	X;X;X;X;X;X;X;X;X;X;X;X;X;X;Oxidation (M);Acetyl (K);X;X;X;X;X;X;X;X;X;X;X;X;X;X;X	XXXXXXXXXPPPPPPPPPPPPPPPPXXXXXX	IASAIMK(1)AADEVAEGK	7	2	-1.5108		12591;12592;12593;12594;12595;12596;12597;12598;12599;12600;12601;12602;12603;12604	12604	4717200	5841800	6645800	4636700	5397000	4555300
P97807	289	P97807	P97807	sp|P97807|FUMH_MOUSE Fumarate hydratase, mitochondrial OS=Mus musculus OX=10090 GN=Fh PE=1 SV=3	1	0.00288165	57.057	1	K	TAVGTGLNTRIGFAEKVAAKVAALTGLPFVT	X;X;X;X;X;X;X;X;X;X;X;X;X;X;X;Acetyl (K);X;X;X;Acetyl (K);X;X;X;X;X;X;X;X;X;X;X	XXXXXXXXXXPPPPPPPPPPXXXXXXXXXXX	IGFAEK(1)VAAK	6	2	-1.196		13017;13018;13019;13020;13021	13021	8152000	7234000	6622000	7425100	0	8024400
P97807	293	P97807	P97807	sp|P97807|FUMH_MOUSE Fumarate hydratase, mitochondrial OS=Mus musculus OX=10090 GN=Fh PE=1 SV=3	1	4.50691e-25	133.16	1	K	TGLNTRIGFAEKVAAKVAALTGLPFVTAPNK	X;X;X;X;X;X;X;X;X;X;X;X;X;X;X;Acetyl (K);X;X;X;X;X;X;X;X;X;X;X;X;X;X;X	XXXXXXXXXXXXPPPPPPPPPPPPPPPPPPP	VAAK(1)VAALTGLPFVTAPNK	4	2	-0.33303		35133;35134;35135;35136;35137;35138;35139;35140;35141;35142	35142	46300	81345	54189	37553	77168	83126
P97807	218	P97807	P97807	sp|P97807|FUMH_MOUSE Fumarate hydratase, mitochondrial OS=Mus musculus OX=10090 GN=Fh PE=1 SV=3	1	0.000279109	116.47	1	K	VLLPGLQKLHDALSAKSKEFAQVIKIGRTHT	X;X;X;X;X;X;X;X;X;X;X;X;X;X;X;Acetyl (K);X;X;X;X;X;X;X;X;Acetyl (K);X;X;X;X;X;X	XXXXXXXXPPPPPPPPPPXXXXXXXXXXXXX	LHDALSAK(1)SK	8	2	-1.0618		16579;16580;16581;16582;16583;16584	16584	119620	97182	65470	68143	85673	76306
P97807	77	P97807	P97807	sp|P97807|FUMH_MOUSE Fumarate hydratase, mitochondrial OS=Mus musculus OX=10090 GN=Fh PE=1 SV=3	1	9.91032e-22	185.84	1	K	DKYYGAQTVRSTMNFKIGGATERMPIPVIQA	X;Acetyl (K);X;X;X;X;X;X;X;X;X;X;Oxidation (M);X;X;Acetyl (K);X;X;X;X;X;X;X;X;X;X;X;X;X;X;X	XXXXXXXXXXPPPPPPPPPPPPPXXXXXXXX	STMNFK(1)IGGATER	6	2	-1.6741		27233;27234;27235;27236;27237;27238;27239;27240;27241;27242;27243;27244;27245;27246;27247;27248	27248	4064400	3614200	6440300	2957400	4258500	4183400
P97807	58	P97807	P97807	sp|P97807|FUMH_MOUSE Fumarate hydratase, mitochondrial OS=Mus musculus OX=10090 GN=Fh PE=1 SV=3	1	6.46564e-32	142.07	1	K	SQNSFRVEFDTFGELKVPTDKYYGAQTVRST	X;X;X;X;X;X;X;X;X;X;X;X;X;X;X;Acetyl (K);X;X;X;X;Acetyl (K);X;X;X;X;X;X;X;X;X;X	XXXXXXPPPPPPPPPPPPPPPXXXXXXXXXX	VEFDTFGELK(1)VPTDK	10	2	-1.4453		35780;35781;35782;35783;35784;35785	35785	59194	114190	243990	92374	116850	102920
P97807	63	P97807	P97807	sp|P97807|FUMH_MOUSE Fumarate hydratase, mitochondrial OS=Mus musculus OX=10090 GN=Fh PE=1 SV=3	1	5.24572e-23	179.48	1	K	RVEFDTFGELKVPTDKYYGAQTVRSTMNFKI	X;X;X;X;X;X;X;X;X;X;X;X;X;X;X;Acetyl (K);X;X;X;X;X;X;X;X;X;X;Oxidation (M);X;X;Acetyl (K);X	XXXXXXXXXXXPPPPPPPPPPPPPXXXXXXX	VPTDK(1)YYGAQTVR	5	2	-0.48112		37359;37360;37361;37362;37363;37364	37364	943050	576780	1138400	239910	785050	677020
P97807	210	P97807	P97807	sp|P97807|FUMH_MOUSE Fumarate hydratase, mitochondrial OS=Mus musculus OX=10090 GN=Fh PE=1 SV=3	1	5.82619e-19	168.66	1	K	AAAVEVHKVLLPGLQKLHDALSAKSKEFAQV	X;X;X;X;X;X;X;X;X;X;X;X;X;X;X;Acetyl (K);X;X;X;X;X;X;X;Acetyl (K);X;X;X;X;X;X;X	XXXXXXXXPPPPPPPPPPPPPPPPXXXXXXX	VLLPGLQK(1)LHDALSAK	8	2	-3.2536		36903;36904;36905;36906;36907;36908;36909;36910;36911;36912	36912	1267800	1708100	1930300	1432500	2023300	1847000
P97823	105	P97823	P97823	sp|P97823|LYPA1_MOUSE Acyl-protein thioesterase 1 OS=Mus musculus OX=10090 GN=Lypla1 PE=1 SV=1	1	8.99838e-09	145.33	1	K	KQAAETVKALIDQEVKNGIPSNRIILGGFSQ	X;X;X;X;X;X;X;X;X;X;X;X;X;X;X;Acetyl (K);X;X;X;X;X;X;X;X;X;X;X;X;X;X;X	XXXXXXXXPPPPPPPPPPPPPPPXXXXXXXX	ALIDQEVK(1)NGIPSNR	8	2	1.0403		1565;1566;1567;1568;1569	1569	0	14791	14960	11836	6169	0
P97823	224	P97823	P97823	sp|P97823|LYPA1_MOUSE Acyl-protein thioesterase 1 OS=Mus musculus OX=10090 GN=Lypla1 PE=1 SV=1	1	0.00115081	56.099	1	K	SSCQQEMMDVKHFIDKLLPPID_________	X;X;X;X;X;X;X;X;X;X;X;X;X;X;X;Acetyl (K);X;X;X;X;X;X;X;X;X;X;X;X;X;X;X	XXXXXXXXXXXPPPPPPPPPPPXXXXXXXXX	HFIDK(1)LLPPID	5	2	-0.90127		10288;10289;10290;10291;10292	10292	1213400	1272500	1612300	1361700	0	1415900
P97823	97	P97823	P97823	sp|P97823|LYPA1_MOUSE Acyl-protein thioesterase 1 OS=Mus musculus OX=10090 GN=Lypla1 PE=1 SV=1	1	0.00183193	66.846	1	K	SQEDESGIKQAAETVKALIDQEVKNGIPSNR	X;X;X;X;X;X;X;X;X;X;X;X;X;X;X;Acetyl (K);X;X;X;X;X;X;X;Acetyl (K);X;X;X;X;X;X;X	XXXXXXXXXPPPPPPPPPPPPPPPXXXXXXX	QAAETVK(1)ALIDQEVK	7	2	-3.4153		23017	23017	0	0	0	6654.5	0	0
P99028	83	P99028	P99028	sp|P99028|QCR6_MOUSE Cytochrome b-c1 complex subunit 6, mitochondrial OS=Mus musculus OX=10090 GN=Uqcrh PE=1 SV=2	1	0.0228187	52.134	1	K	ELFDFLHARDHCVAHKLFKNLK_________	X;X;X;X;X;X;X;X;X;X;X;X;X;X;X;Acetyl (K);X;X;X;X;X;X;X;X;X;X;X;X;X;X;X	XXXXXXXXXPPPPPPPPPPXXXXXXXXXXXX	DHCVAHK(1)LFK	7	2	-0.55912		3670	3670	0	0	6517	0	0	0
P99028	40	P99028	P99028	sp|P99028|QCR6_MOUSE Cytochrome b-c1 complex subunit 6, mitochondrial OS=Mus musculus OX=10090 GN=Uqcrh PE=1 SV=2	1	1.43898e-32	193.59	1	K	VDPLTTVREHCEQLEKCVKARERLELCDNRV	X;X;X;X;X;X;X;X;X;X;X;X;X;X;X;Acetyl (K);X;X;X;X;X;X;X;X;X;X;X;X;X;X;X	XXXXXXXXPPPPPPPPPPPXXXXXXXXXXXX	EHCEQLEK(1)CVK	8	2	-1.1593		4796;4797;4798;4799;4800;4801	4801	1588600	1459100	1695400	989840	1089000	1133400
P99029	79	P99029	P99029	sp|P99029|PRDX5_MOUSE Peroxiredoxin-5, mitochondrial OS=Mus musculus OX=10090 GN=Prdx5 PE=1 SV=2	1	3.18443e-08	130.85	1	K	FEGEPGKKVNLAELFKGKKGVLFGVPGAFTP	X;X;X;X;X;X;Acetyl (K);X;X;X;X;X;X;X;X;Acetyl (K);X;X;X;X;X;X;X;X;X;X;X;X;X;X;X	XXXXXXXPPPPPPPPPPPXXXXXXXXXXXXX	VNLAELFK(1)GK	8	2	-2.582		15235;15236;15237;15238;15239;15240;37217;37218;37219;37220;37221;37222	37222	207570	186650	222870	148830	209050	194440
P99029	112	P99029	P99029	sp|P99029|PRDX5_MOUSE Peroxiredoxin-5, mitochondrial OS=Mus musculus OX=10090 GN=Prdx5 PE=1 SV=2	1	6.0203e-19	157.84	1	K	SKTHLPGFVEQAGALKAKGAQVVACLSVNDV	X;X;X;X;X;X;X;X;X;X;X;X;X;X;X;Acetyl (K);X;X;X;X;X;X;X;X;X;X;X;X;X;X;X	XXPPPPPPPPPPPPPPPPXXXXXXXXXXXXX	THLPGFVEQAGALK(1)AK	14	2	-0.0127		30417;30418;30419;30420;30421;30422;30423;30424;30425;30426;30427;30428;30429;30430;30431;30432;30433	30433	42148	44202	48645	14161	24033	19708
P99029	70	P99029	P99029	sp|P99029|PRDX5_MOUSE Peroxiredoxin-5, mitochondrial OS=Mus musculus OX=10090 GN=Prdx5 PE=1 SV=2	1	1.39359e-23	143.81	1	K	GDAIPSVEVFEGEPGKKVNLAELFKGKKGVL	X;X;X;X;X;X;X;X;X;X;X;X;X;X;X;Acetyl (K);X;X;X;X;X;X;X;X;Acetyl (K);X;X;X;X;X;X	PPPPPPPPPPPPPPPPPXXXXXXXXXXXXXX	VGDAIPSVEVFEGEPGK(1)K	17	2	0.35029		36141;36142;36143;36144;36145;36146	36146	1958000	2033000	1659100	1961300	2049600	1991400
Q00623	205	Q00623	Q00623	sp|Q00623|APOA1_MOUSE Apolipoprotein A-I OS=Mus musculus OX=10090 GN=Apoa1 PE=1 SV=2	1	7.86623e-10	130.41	1	K	SEQMRESLAQRLAELKSNPTLNEYHTRAKTH	X;X;X;Oxidation (M);X;X;X;X;X;X;X;X;X;X;X;Acetyl (K);X;X;X;X;X;X;X;X;X;X;X;X;X;X;X	XXXXXXXXXXXPPPPPPPPPPPPPPPPXXXX	LAELK(1)SNPTLNEYHTR	5	2	-2.1917		15351;15352;15353;15354;15355;15356;15357;15358;15359	15359	84116	68348	83056	18934	77116	35477
Q00623	156	Q00623	Q00623	sp|Q00623|APOA1_MOUSE Apolipoprotein A-I OS=Mus musculus OX=10090 GN=Apoa1 PE=1 SV=2	1	9.03299e-38	113.84	1	K	KVAPLGAELQESARQKLQELQGRLSPVAEEF	X;X;X;X;X;X;X;X;X;X;X;X;X;X;X;Acetyl (K);X;X;X;X;X;X;X;X;X;X;X;X;X;X;X	XXXXXXXXXXXXXXPPPPPPPPPXXXXXXXX	QK(1)LQELQGR	2	2	-0.90019		23647;23648;23649;23650;23651	23651	195160	73567	234260	0	204640	53484
Q00623	222	Q00623	Q00623	sp|Q00623|APOA1_MOUSE Apolipoprotein A-I OS=Mus musculus OX=10090 GN=Apoa1 PE=1 SV=2	1	0.0020363	45.439	1	K	NPTLNEYHTRAKTHLKTLGEKARPALEDLRH	X;X;X;X;X;X;X;X;X;X;X;X;X;X;X;Acetyl (K);X;X;X;X;X;X;X;X;X;X;X;X;X;X;X	XXXXXXXXXXXXPPPPPPPPPXXXXXXXXXX	THLK(1)TLGEK	4	2	0.42481		30401;30402;30403;30404	30404	46025	29703	22746	0	23302	0
Q00623	256	Q00623	Q00623	sp|Q00623|APOA1_MOUSE Apolipoprotein A-I OS=Mus musculus OX=10090 GN=Apoa1 PE=1 SV=2	1	2.13972e-13	113.12	1	K	PMLETLKTQVQSVIDKASETLTAQ_______	X;X;X;X;X;X;X;X;X;X;X;X;X;X;X;Acetyl (K);X;X;X;X;X;X;X;X;X;X;X;X;X;X;X	XXXXXXXPPPPPPPPPPPPPPPPPXXXXXXX	TQVQSVIDK(1)ASETLTAQ	9	2	1.7117		33080;33081	33081	0	0	11566	0	3853	0
Q01768	49	Q01768	Q01768	sp|Q01768|NDKB_MOUSE Nucleoside diphosphate kinase B OS=Mus musculus OX=10090 GN=Nme2 PE=1 SV=1	1	1.03401e-06	78.613	1	K	RLVAMKFLRASEEHLKQHYIDLKDRPFFPGL	X;X;X;X;X;X;X;X;X;X;X;X;X;X;X;Acetyl (K);X;X;X;X;X;X;X;X;X;X;X;X;X;X;X	XXXXXXXXXPPPPPPPPPPPPPPXXXXXXXX	ASEEHLK(1)QHYIDLK	7	2	-0.57887		2276;2277;2278;2279;2280;2281;2282;2283	2283	27404	18673	13699	0	13960	0
Q01853	18	Q01853	Q01853	sp|Q01853|TERA_MOUSE Transitional endoplasmic reticulum ATPase OS=Mus musculus OX=10090 GN=Vcp PE=1 SV=4	1	0.000635923	84.681	1	K	SGADSKGDDLSTAILKQKNRPNRLIVDEAIN	X;X;X;X;X;X;X;X;X;X;X;X;X;X;X;Acetyl (K);X;X;X;X;X;X;X;X;X;X;X;X;X;X;X	XXXXXXPPPPPPPPPPPPXXXXXXXXXXXXX	GDDLSTAILK(1)QK	10	2	-1.7945		7601	7601	8491.9	0	0	0	0	0
Q02053	671	Q02053	Q02053	sp|Q02053|UBA1_MOUSE Ubiquitin-like modifier-activating enzyme 1 OS=Mus musculus OX=10090 GN=Uba1 PE=1 SV=1	1	0.00918432	32.162	1	K	FKQPAENVNQYLTDSKFVERTLRLAGTQPLE	X;X;X;X;X;X;X;X;X;X;X;X;X;X;X;Acetyl (K);X;X;X;X;X;X;X;X;X;X;X;X;X;X;X	XXPPPPPPPPPPPPPPPPPPXXXXXXXXXXX	QPAENVNQYLTDSK(1)FVER	14	2	-1.7191		23832	23832	0	0	0	9158.8	0	0
Q02566;Q91Z83	83;83	Q02566	Q02566	sp|Q02566|MYH6_MOUSE Myosin-6 OS=Mus musculus OX=10090 GN=Myh6 PE=1 SV=2;sp|Q91Z83|MYH7_MOUSE Myosin-7 OS=Mus musculus OX=10090 GN=Myh7 PE=2 SV=1	1	2.92392e-42	201.4	1	K	TVTIKEDQVMQQNPPKFDKIEDMAMLTFLHE	X;X;X;X;X;X;X;X;X;X;X;X;X;X;X;Acetyl (K);X;X;X;X;X;X;X;X;X;X;X;X;X;X;X	XXXXXPPPPPPPPPPPPPPXXXXXXXXXXXX	EDQVMQQNPPK(1)FDK	11	2	-0.24078		4494;4495;4496	4496	208440	0	164500	0	213720	0
Q02566;Q91Z83	1833;1831	Q02566	Q02566	sp|Q02566|MYH6_MOUSE Myosin-6 OS=Mus musculus OX=10090 GN=Myh6 PE=1 SV=2;sp|Q91Z83|MYH7_MOUSE Myosin-7 OS=Mus musculus OX=10090 GN=Myh7 PE=2 SV=1	1	0.000418433	125.97	1	K	EARVRELENELEAEQKRNAESVKGMRKSERR	X;X;X;X;X;X;X;X;X;X;X;X;X;X;X;Acetyl (K);X;X;X;X;X;X;X;X;X;X;X;X;X;X;X	XXXXXPPPPPPPPPPPPXXXXXXXXXXXXXX	ELENELEAEQK(1)R	11	2	-3.4868		5038	5038	8354.5	0	0	0	0	0
Q02566;Q91Z83	746;744	Q02566	Q02566	sp|Q02566|MYH6_MOUSE Myosin-6 OS=Mus musculus OX=10090 GN=Myh6 PE=1 SV=2;sp|Q91Z83|MYH7_MOUSE Myosin-7 OS=Mus musculus OX=10090 GN=Myh7 PE=2 SV=1	1	5.40009e-05	81.555	1	K	AIPEGQFIDSRKGAEKLLGSLDIDHNQYKFG	X;X;X;X;X;X;X;X;X;X;X;X;X;X;X;Acetyl (K);X;X;X;X;X;X;X;X;X;X;X;X;X;X;X	XXXXXXXXXXXXPPPPPPPPPPPPPPPPPXX	GAEK(1)LLGSLDIDHNQYK	4	2	-1.4843		7454	7454	17018	0	0	0	0	0
Q02566	1643	Q02566	Q02566	sp|Q02566|MYH6_MOUSE Myosin-6 OS=Mus musculus OX=10090 GN=Myh6 PE=1 SV=2	1	0.0137254	47.111	1	K	EIQLSQANRIASEAQKHLKNSQAHLKDTQLQ	X;X;X;X;X;X;X;X;X;X;X;X;X;X;X;Acetyl (K);X;X;X;X;X;X;X;X;X;X;X;X;X;X;X	XXXXXXXXXPPPPPPPPPPXXXXXXXXXXXX	IASEAQK(1)HLK	7	2	-0.47086		12605;12606	12606	11730	0	2947	0	0	0
Q02566;Q91Z83	1872;1870	Q02566	Q02566	sp|Q02566|MYH6_MOUSE Myosin-6 OS=Mus musculus OX=10090 GN=Myh6 PE=1 SV=2;sp|Q91Z83|MYH7_MOUSE Myosin-7 OS=Mus musculus OX=10090 GN=Myh7 PE=2 SV=1	1	0.0010836	25.597	1	K	EEDKKNLMRLQDLVDKLQLKVKAYKRQAEEA	X;X;X;X;X;X;X;X;X;X;X;X;X;X;X;Acetyl (K);X;X;X;X;X;X;X;X;X;X;X;X;X;X;X	XXXXXXXXXPPPPPPPPPPPXXXXXXXXXXX	LQDLVDK(1)LQLK	7	2	-1.0495		18265	18265	22093	0	0	0	0	0
Q02566	1530	Q02566	Q02566	sp|Q02566|MYH6_MOUSE Myosin-6 OS=Mus musculus OX=10090 GN=Myh6 PE=1 SV=2	1	0.00936947	60.948	1	K	TEQLGEGGKNVHELEKIRKQLEVEKLELQSA	X;X;X;X;X;X;X;X;X;X;X;X;X;X;X;Acetyl (K);X;X;X;X;X;X;X;X;X;X;X;X;X;X;X	XXXXXXXXXPPPPPPPPPXXXXXXXXXXXXX	NVHELEK(1)IR	7	2	-0.95974		21716;21717;21718	21718	96627	0	0	26497	54812	0
Q02566;Q91Z83	1897;1895	Q02566	Q02566	sp|Q02566|MYH6_MOUSE Myosin-6 OS=Mus musculus OX=10090 GN=Myh6 PE=1 SV=2;sp|Q91Z83|MYH7_MOUSE Myosin-7 OS=Mus musculus OX=10090 GN=Myh7 PE=2 SV=1	1	0.000598473	95.751	1	K	RQAEEAEEQANTNLSKFRKVQHELDEAEERA	X;X;X;X;X;X;X;X;X;X;X;X;X;X;X;Acetyl (K);X;X;X;X;X;X;X;X;X;X;X;X;X;X;X	XPPPPPPPPPPPPPPPPPXXXXXXXXXXXXX	QAEEAEEQANTNLSK(1)FR	15	2	-1.2068		23041	23041	7817	0	0	0	0	0
Q02566;Q91Z83	1446;1444	Q02566	Q02566	sp|Q02566|MYH6_MOUSE Myosin-6 OS=Mus musculus OX=10090 GN=Myh6 PE=1 SV=2;sp|Q91Z83|MYH7_MOUSE Myosin-7 OS=Mus musculus OX=10090 GN=Myh7 PE=2 SV=1	1	0.00384684	52.489	1	K	MVDVERSNAAAAALDKKQRNFDKILAEWKQK	X;X;X;X;X;X;X;X;X;X;X;X;X;X;X;Acetyl (K);X;X;X;X;X;X;X;X;X;X;X;X;X;X;X	XXXXXXPPPPPPPPPPPXXXXXXXXXXXXXX	SNAAAAALDK(1)K	10	2	0.62146		26495	26495	48243	0	0	0	0	0
Q02566	43	Q02566	Q02566	sp|Q02566|MYH6_MOUSE Myosin-6 OS=Mus musculus OX=10090 GN=Myh6 PE=1 SV=2	1	0.00292582	60.926	1	K	TRPFDIRTECFVPDDKEEYVKAKVVSREGGK	X;X;X;X;X;X;X;X;X;X;X;X;X;X;X;Acetyl (K);X;X;X;X;X;X;X;X;X;X;X;X;X;X;X	XXXXXXXPPPPPPPPPPPPPPXXXXXXXXXX	TECFVPDDK(1)EEYVK	9	2	-3.3116		28919	28919	14497	0	0	0	0	0
Q02780	299	Q02780	Q02780	sp|Q02780|NFIA_MOUSE Nuclear factor 1 A-type OS=Mus musculus OX=10090 GN=Nfia PE=1 SV=1	1	0.0103721	57.134	1	K	AMRRSLPSTSSTSSTKRLKSVEDEMDSPGEE	X;X;X;X;X;X;X;X;X;X;X;X;X;X;X;Acetyl (K);X;X;X;X;X;X;X;X;X;X;X;X;X;X;X	XXXXPPPPPPPPPPPPPXXXXXXXXXXXXXX	SLPSTSSTSSTK(1)R	12	2	-0.26726		26238;26239;26240	26240	0	29807	0	31208	22651	0
Q03265	427	Q03265	Q03265	sp|Q03265|ATPA_MOUSE ATP synthase subunit alpha, mitochondrial OS=Mus musculus OX=10090 GN=Atp5f1a PE=1 SV=1	1	1.58424e-06	113.62	1	K	LSVSRVGSAAQTRAMKQVAGTMKLELAQYRE	X;X;X;X;X;X;X;X;X;X;X;X;X;X;Oxidation (M);Acetyl (K);X;X;X;X;X;Oxidation (M);Acetyl (K);X;X;X;X;X;X;X;X	XXXXXXXXXXXXXPPPPPPPPPPXXXXXXXX	AMK(1)QVAGTMK	3	2	-1.3249		1869;1870;1871;1872;1873;1874;1875;1876;1877;1878;1879;1880	1880	1215200	993190	727210	932030	1134200	1066800
Q03265	434	Q03265	Q03265	sp|Q03265|ATPA_MOUSE ATP synthase subunit alpha, mitochondrial OS=Mus musculus OX=10090 GN=Atp5f1a PE=1 SV=1	1	1.73496e-42	252.4	1	K	SAAQTRAMKQVAGTMKLELAQYREVAAFAQF	X;X;X;X;X;X;X;X;X;X;X;X;X;X;Oxidation (M);Acetyl (K);X;X;X;X;X;X;X;X;X;X;X;X;X;X;X	XXXXXXXXXPPPPPPPPPPPPPPXXXXXXXX	QVAGTMK(1)LELAQYR	7	2	-0.12213		23963;23964;23965;23966;23967;23968;23969;23970;23971;23972;23973	23973	316180	219630	288750	133350	255220	141380
Q03265	239	Q03265	Q03265	sp|Q03265|ATPA_MOUSE ATP synthase subunit alpha, mitochondrial OS=Mus musculus OX=10090 GN=Atp5f1a PE=1 SV=1	1	1.74349e-24	194.96	1;2	K	DTIINQKRFNDGTDEKKKLYCIYVAIGQKRS	X;X;X;X;X;X;Acetyl (K);X;X;X;X;X;X;X;X;Acetyl (K);Acetyl (K);X;X;X;X;X;X;X;X;X;X;X;X;X;X	XXXXXXXPPPPPPPPPPPXXXXXXXXXXXXX	RFNDGTDEK(1)K	9	2	-1.7981		6791;6792;6793;6794;6795;6796;6797;6798;6799;6800;6801;6802;6803;6805;6806;6807;6809;6810;6811;6812;6813;24180;24181;24182;24183;24184	24184	3619300	2781300	2980200	3515300	3896900	4039700
Q03265	240	Q03265	Q03265	sp|Q03265|ATPA_MOUSE ATP synthase subunit alpha, mitochondrial OS=Mus musculus OX=10090 GN=Atp5f1a PE=1 SV=1	1	6.47934e-08	117.86	1;2	K	TIINQKRFNDGTDEKKKLYCIYVAIGQKRST	X;X;X;X;X;Acetyl (K);X;X;X;X;X;X;X;X;Acetyl (K);Acetyl (K);X;X;X;X;X;X;X;X;X;X;X;X;X;X;X	XXXXXXXPPPPPPPPPPXXXXXXXXXXXXXX	FNDGTDEK(1)K(1)K	9	2	-1.4462		6802;6804;6808;6809;6810;6811;6812;6813	6813	1338200	12747	1058000	13604	16304	33345
Q03265	498	Q03265	Q03265	sp|Q03265|ATPA_MOUSE ATP synthase subunit alpha, mitochondrial OS=Mus musculus OX=10090 GN=Atp5f1a PE=1 SV=1	1	5.02397e-12	128.02	1	K	EQVAVIYAGVRGYLDKLEPSKITKFENAFLS	X;X;X;X;X;X;X;X;X;X;X;X;X;X;X;Acetyl (K);X;X;X;X;Acetyl (K);X;X;X;X;X;X;X;X;X;X	XXXXXXXXXXXPPPPPPPPPPXXXXXXXXXX	GYLDK(1)LEPSK	5	2	0.013906		9890;9891;9892;9893;9894	9894	1026800	0	803170	890400	1020300	824480
Q03265	316	Q03265	Q03265	sp|Q03265|ATPA_MOUSE ATP synthase subunit alpha, mitochondrial OS=Mus musculus OX=10090 GN=Atp5f1a PE=1 SV=1	1	1.23907e-15	56.661	1	K	RDNGKHALIIYDDLSKQAVAYRQMSLLLRRP	X;X;X;X;X;X;X;X;X;X;X;X;X;X;X;Acetyl (K);X;X;X;X;X;X;X;Oxidation (M);X;X;X;X;X;X;X	XXXXXPPPPPPPPPPPPPPPPPXXXXXXXXX	HALIIYDDLSK(1)QAVAYR	11	2	-0.027178		10053;10054;10055;10056	10056	21891	36344	27159	0	17467	0
Q03265	539	Q03265	Q03265	sp|Q03265|ATPA_MOUSE ATP synthase subunit alpha, mitochondrial OS=Mus musculus OX=10090 GN=Atp5f1a PE=1 SV=1	1	7.2304e-31	205.97	1;2	K	GNIRSDGKISEQSDAKLKEIVTNFLAGFEP_	X;X;X;X;X;X;X;Acetyl (K);X;X;X;X;X;X;X;Acetyl (K);X;X;X;X;X;X;X;X;X;X;X;X;X;X;X	XXXXPPPPPPPPPPPPPPXXXXXXXXXXXXX	SDGK(1)ISEQSDAK(1)LK	12	2	-0.80692		14146;14147;14148;14149;14150;14151;14152;14153;14154;24696;24697;24698;24699;24700;24701	24701	8365300	5989700	7816600	8271300	8671700	9386700
Q03265	531	Q03265	Q03265	sp|Q03265|ATPA_MOUSE ATP synthase subunit alpha, mitochondrial OS=Mus musculus OX=10090 GN=Atp5f1a PE=1 SV=1	1	7.2304e-31	205.97	1;2	K	ISQHQSLLGNIRSDGKISEQSDAKLKEIVTN	X;X;X;X;X;X;X;X;X;X;X;X;X;X;X;Acetyl (K);X;X;X;X;X;X;X;Acetyl (K);X;X;X;X;X;X;X	XXXXXXXXXXXXPPPPPPPPPPPPPPXXXXX	SDGK(1)ISEQSDAK(1)LK	4	2	-0.80692		24690;24691;24692;24693;24694;24695;24696;24697;24698;24699;24700;24701	24701	425160	374780	383440	513950	509830	529300
Q03265	261	Q03265	Q03265	sp|Q03265|ATPA_MOUSE ATP synthase subunit alpha, mitochondrial OS=Mus musculus OX=10090 GN=Atp5f1a PE=1 SV=1	1	3.62858e-16	138.81	1	K	YVAIGQKRSTVAQLVKRLTDADAMKYTIVVS	X;X;X;X;X;X;X;X;X;X;X;X;X;X;X;Acetyl (K);X;X;X;X;X;X;X;X;X;X;X;X;X;X;X	XXXXXXXXPPPPPPPPPXXXXXXXXXXXXXX	STVAQLVK(1)R	8	2	0.034327		27316;27317;27318;27319;27320;27321	27321	2910100	2099200	1980700	1479700	2307800	2257600
Q03265	230	Q03265	Q03265	sp|Q03265|ATPA_MOUSE ATP synthase subunit alpha, mitochondrial OS=Mus musculus OX=10090 GN=Atp5f1a PE=1 SV=1	1	2.51885e-68	253.58	1	K	QTGKTSIAIDTIINQKRFNDGTDEKKKLYCI	X;X;X;X;X;X;X;X;X;X;X;X;X;X;X;Acetyl (K);X;X;X;X;X;X;X;X;Acetyl (K);Acetyl (K);X;X;X;X;X	XXXXPPPPPPPPPPPPPXXXXXXXXXXXXXX	TSIAIDTIINQK(1)R	12	2	-0.89469		33384;33385;33386;33387;33388;33389	33389	630270	428090	485910	358320	506000	448720
Q03265	175	Q03265	Q03265	sp|Q03265|ATPA_MOUSE ATP synthase subunit alpha, mitochondrial OS=Mus musculus OX=10090 GN=Atp5f1a PE=1 SV=1	1	0.000727204	95.844	1	K	GKGPIGSKTRRRVGLKAPGIIPRISVREPMQ	X;Acetyl (K);X;X;X;X;X;X;X;X;X;X;X;X;X;Acetyl (K);X;X;X;X;X;X;X;X;X;X;X;X;X;X;X	XXXXXXXXXXXXPPPPPPPPPPPXXXXXXXX	VGLK(1)APGIIPR	4	2	-1.5519		36216;36217	36217	305000	0	0	0	0	231940
Q03265	161	Q03265	Q03265	sp|Q03265|ATPA_MOUSE ATP synthase subunit alpha, mitochondrial OS=Mus musculus OX=10090 GN=Atp5f1a PE=1 SV=1	1	1.4903e-23	199.06	1	K	LLGRVVDALGNAIDGKGPIGSKTRRRVGLKA	X;X;X;X;X;X;X;X;X;X;X;X;X;X;X;Acetyl (K);X;X;X;X;X;X;X;X;X;X;X;X;X;Acetyl (K);X	XXXXPPPPPPPPPPPPPPPPPPXXXXXXXXX	VVDALGNAIDGK(1)GPIGSK	12	2	-3.4819		37819;37820;37821;37822;37823;37824	37824	55201	68528	46777	80637	92253	83785
Q04447	307	Q04447	Q04447	sp|Q04447|KCRB_MOUSE Creatine kinase B-type OS=Mus musculus OX=10090 GN=Ckb PE=1 SV=1	1	0.000236319	102.33	1	K	RAGVHIKLPHLGKHEKFSEVLKRLRLQKRGT	X;X;X;X;X;X;X;X;X;X;X;X;X;X;X;Acetyl (K);X;X;X;X;X;X;X;X;X;X;X;X;X;X;X	XXXXXXXXXXXXXPPPPPPPPPXXXXXXXXX	HEK(1)FSEVLK	3	2	-1.0919		10114;10115;10116;10117;10118;10119	10119	37654	27155	23570	14215	20020	15710
Q05920	992	Q05920	Q05920	sp|Q05920|PYC_MOUSE Pyruvate carboxylase, mitochondrial OS=Mus musculus OX=10090 GN=Pc PE=1 SV=1	1	0.0206033	25.148	1	K	RPGASLPPLNLKELEKDLIDRHGEEVTPEDV	X;X;X;X;X;X;X;X;X;X;X;X;X;X;X;Acetyl (K);X;X;X;X;X;X;X;X;X;X;X;X;X;X;X	XXXXXXXXXXXXPPPPPPPPPXXXXXXXXXX	ELEK(1)DLIDR	4	2	0.97712		5032	5032	19700	0	0	0	0	0
Q05920	316	Q05920	Q05920	sp|Q05920|PYC_MOUSE Pyruvate carboxylase, mitochondrial OS=Mus musculus OX=10090 GN=Pc PE=1 SV=1	1	3.51856e-25	139.17	1	K	QVGYENAGTVEFLVDKHGKHYFIEVNSRLQV	X;X;X;X;X;X;X;X;X;X;X;X;X;X;X;Acetyl (K);X;X;X;X;X;X;X;X;X;X;X;X;X;X;X	PPPPPPPPPPPPPPPPPPPXXXXXXXXXXXX	QVGYENAGTVEFLVDK(1)HGK	16	2	-2.6718		23990;23991;23992;23993;23994	23994	0	70340	128490	100770	87884	62645
Q06185	34	Q06185	Q06185	sp|Q06185|ATP5I_MOUSE ATP synthase subunit e, mitochondrial OS=Mus musculus OX=10090 GN=Atp5me PE=1 SV=2	1	0.00848732	72.632	1	K	LIIGMAYGAKRYSYLKPRAEEERRIAAEEKK	X;X;X;X;Oxidation (M);X;X;X;X;Acetyl (K);X;X;X;X;X;Acetyl (K);X;X;X;X;X;X;X;X;X;X;X;X;X;X;X	XXXXXXXXXXXPPPPPPPXXXXXXXXXXXXX	YSYLK(1)PR	5	2	0.38092		39877;39878;39879;39880;39881;39882;39883	39883	157680	103130	200020	19760	66185	54945
Q07417	51	Q07417	Q07417	sp|Q07417|ACADS_MOUSE Short-chain specific acyl-CoA dehydrogenase, mitochondrial OS=Mus musculus OX=10090 GN=Acads PE=1 SV=2	1	1.37103e-09	118.62	1	K	ETHQMLRQTCRDFAEKELVPIAAQLDREHLF	X;X;X;X;X;X;X;X;X;X;X;X;X;X;X;Acetyl (K);X;X;X;X;X;X;X;X;X;X;X;X;X;X;X	XXXXXXXXXXXPPPPPPPPPPPPPPPPXXXX	DFAEK(1)ELVPIAAQLDR	5	2	-2.6497		3500;3501;3502	3502	205200	246480	0	195710	0	0
Q07417	72	Q07417	Q07417	sp|Q07417|ACADS_MOUSE Short-chain specific acyl-CoA dehydrogenase, mitochondrial OS=Mus musculus OX=10090 GN=Acads PE=1 SV=2	1	3.07952e-06	126.36	1	K	AAQLDREHLFPTAQVKKMGELGLLAMDVPEE	X;X;X;X;X;X;X;X;X;X;X;X;X;X;X;Acetyl (K);X;X;X;X;X;X;X;X;X;X;X;X;X;X;X	XXXXXXPPPPPPPPPPPXXXXXXXXXXXXXX	EHLFPTAQVK(1)K	10	2	-1.4226		4816;4817;4818;4819;4820;4821	4821	169940	177810	187510	120200	159570	182340
Q07417	306	Q07417	Q07417	sp|Q07417|ACADS_MOUSE Short-chain specific acyl-CoA dehydrogenase, mitochondrial OS=Mus musculus OX=10090 GN=Acads PE=1 SV=2	1	2.02657e-120	305.66	1	K	VKYAENRNAFGAPLTKLQNIQFKLADMALAL	X;X;X;X;X;X;X;X;X;X;X;X;X;X;X;Acetyl (K);X;X;X;X;X;X;X;X;X;X;X;X;X;X;X	XXXXXXXPPPPPPPPPPPPPPPPXXXXXXXX	NAFGAPLTK(1)LQNIQFK	9	2	-0.78483		20689;20690;20691;20692;20693;20694	20694	590250	743270	669330	562450	839170	733310
Q08857	431	Q08857	Q08857	sp|Q08857|CD36_MOUSE Platelet glycoprotein 4 OS=Mus musculus OX=10090 GN=Cd36 PE=1 SV=2	1	0.000275235	96.051	1	K	LNETGTIGDEKAEMFKTQVTGKIKLLGMVEM	X;X;X;X;X;X;X;X;X;X;X;X;X;X;X;Acetyl (K);X;X;X;X;X;Acetyl (K);X;X;X;X;X;X;X;X;X	XXXXXXXXXXXPPPPPPPPPPPXXXXXXXXX	AEMFK(1)TQVTGK	5	2	-0.15894		614;615;616;617	617	39871	21619	32204	0	32547	0
Q08857	437	Q08857	Q08857	sp|Q08857|CD36_MOUSE Platelet glycoprotein 4 OS=Mus musculus OX=10090 GN=Cd36 PE=1 SV=2	1	0.0334639	38.643	1	K	IGDEKAEMFKTQVTGKIKLLGMVEMALLGIG	X;X;X;X;X;X;X;X;X;X;X;X;X;X;X;Acetyl (K);X;X;X;X;X;X;X;X;X;X;X;X;X;X;X	XXXXXXXXXXPPPPPPPPXXXXXXXXXXXXX	TQVTGK(1)IK	6	2	-1.5529		33082;33083;33084;33085	33085	60136	0	72595	0	74391	9222.9
Q08857	56	Q08857	Q08857	sp|Q08857|CD36_MOUSE Platelet glycoprotein 4 OS=Mus musculus OX=10090 GN=Cd36 PE=1 SV=2	1	3.31484e-11	128.59	1	K	EVVLEEGTTAFKNWVKTGTTVYRQFWIFDVQ	X;X;X;X;X;X;X;X;X;X;X;X;X;X;X;Acetyl (K);X;X;X;X;X;X;X;X;X;X;X;X;X;X;X	XXXXXXXXXXXXPPPPPPPPPPPXXXXXXXX	NWVK(1)TGTTVYR	4	2	-3.2587		21820;21821;21822;21823;21824;21825	21825	143370	126160	77613	21459	47005	24293
Q1XH17	178	Q1XH17	Q1XH17	sp|Q1XH17|TRI72_MOUSE Tripartite motif-containing protein 72 OS=Mus musculus OX=10090 GN=Trim72 PE=1 SV=1	1	0.010551	65.022	1	K	ETVRQFRGAVGEQLGKMRMFLAALESSLDRE	X;X;X;X;X;X;X;X;X;X;X;X;X;X;X;Acetyl (K);X;X;X;X;X;X;X;X;X;X;X;X;X;X;X	XXXXXXXPPPPPPPPPPPXXXXXXXXXXXXX	GAVGEQLGK(1)MR	9	2	-2.1767		7548	7548	0	17167	0	0	0	0
Q1XH17	317	Q1XH17	Q1XH17	sp|Q1XH17|TRI72_MOUSE Tripartite motif-containing protein 72 OS=Mus musculus OX=10090 GN=Trim72 PE=1 SV=1	1	6.37464e-11	130.32	1	K	LVVSSSGRRVECSDQKAPPAGEDTRQFDKAV	X;X;X;X;X;X;X;X;X;X;X;X;X;X;X;Acetyl (K);X;X;X;X;X;X;X;X;X;X;X;X;X;X;X	XXXXXXXXXPPPPPPPPPPPPPPPPXXXXXX	VECSDQK(1)APPAGEDTR	7	2	-1.1834		35761;35762	35762	16890	0	5509.8	0	0	0
Q1XH17	232	Q1XH17	Q1XH17	sp|Q1XH17|TRI72_MOUSE Tripartite motif-containing protein 72 OS=Mus musculus OX=10090 GN=Trim72 PE=1 SV=1	1	2.90463e-14	123.18	1	K	EQLRQMEKVLEEVADKPQTEFLMKFCLVTSR	X;X;X;X;X;X;X;X;X;X;X;X;X;X;X;Acetyl (K);X;X;X;X;X;X;X;X;X;X;X;X;X;X;X	XXXXXXXXPPPPPPPPPPPPPPPPXXXXXXX	VLEEVADK(1)PQTEFLMK	8	2	-3.3603		36779;36780;36781;36782;36783	36783	14297	11055	17032	0	10127	1846.4
Q2TPA8	87	Q2TPA8	Q2TPA8	sp|Q2TPA8|HSDL2_MOUSE Hydroxysteroid dehydrogenase-like protein 2 OS=Mus musculus OX=10090 GN=Hsdl2 PE=1 SV=1	1	2.96121e-162	314.89	1	K	VVDVRDEQQINSAVEKAVEKFGGIDILVNNA	X;X;X;X;X;X;X;X;X;X;X;X;X;X;X;Acetyl (K);X;X;X;X;X;X;X;X;X;X;X;X;X;X;X	XXXXXPPPPPPPPPPPPPPPXXXXXXXXXXX	DEQQINSAVEK(1)AVEK	11	2	-1.3418		3492;3493;3494;3495;3496;3497	3497	423130	422420	452180	391180	412890	390410
Q2TPA8	42	Q2TPA8	Q2TPA8	sp|Q2TPA8|HSDL2_MOUSE Hydroxysteroid dehydrogenase-like protein 2 OS=Mus musculus OX=10090 GN=Hsdl2 PE=1 SV=1	1	0.00028271	71.921	1	K	ALKAAKDGANIVIAAKTTQKHPKLLGTIYTA	X;X;X;X;X;X;X;X;X;X;X;X;X;X;X;Acetyl (K);X;X;X;X;X;X;X;X;X;X;X;X;X;X;X	XXXXXXPPPPPPPPPPPPPPXXXXXXXXXXX	DGANIVIAAK(1)TTQK	10	2	0.77737		3592;3593;3594;3595;3596;3597	3597	23745	21895	4280.2	14135	18256	26967
Q2TPA8	298	Q2TPA8	Q2TPA8	sp|Q2TPA8|HSDL2_MOUSE Hydroxysteroid dehydrogenase-like protein 2 OS=Mus musculus OX=10090 GN=Hsdl2 PE=1 SV=1	1	4.03267e-11	111.47	1	K	EEKESNDSVPEVKEEKLQLQEESQLQKQPQL	X;X;X;X;X;X;X;X;X;X;X;X;X;X;X;Acetyl (K);X;X;X;X;X;X;X;X;X;X;X;X;X;X;X	XXXXXXXXXXXXXPPPPPPPPPPPPPPXXXX	EEK(1)LQLQEESQLQK	3	2	-8.367		4578;4579	4579	22226	25578	0	0	0	0
Q2TPA8	340	Q2TPA8	Q2TPA8	sp|Q2TPA8|HSDL2_MOUSE Hydroxysteroid dehydrogenase-like protein 2 OS=Mus musculus OX=10090 GN=Hsdl2 PE=1 SV=1	1	5.74907e-10	70.14	1	K	LQEKPQLQEQPQLQEKPQLQEQPQQREQPQL	X;X;X;X;X;X;X;X;X;X;X;X;X;X;X;Acetyl (K);X;X;X;X;X;X;X;X;X;X;X;X;X;X;X	XXXXPPPPPPPPPPPPPPPPPPPPPPXXXXX	PQLQEQPQLQEK(1)PQLQEQPQQR	12	3	0.64775		22651;22652	22652	0	0	6080.9	0	0	11225
Q2VPQ9	69	Q2VPQ9	Q2VPQ9	sp|Q2VPQ9|EAF6_MOUSE Chromatin modification-related protein MEAF6 OS=Mus musculus OX=10090 GN=Meaf6 PE=1 SV=1	1	2.81323e-10	123.48	2	K	YGNIIRGWDRYLTNQKNSNSKNDRRNRKFKE	X;X;X;X;X;X;X;X;X;X;X;X;X;X;X;Acetyl (K);X;X;X;X;Acetyl (K);X;X;X;X;X;X;X;X;X;X	XXXXXXXXXXPPPPPPPPPPPPPPXXXXXXX	YLTNQK(1)NSNSK(1)NDR	6	2	0.38233		39612;39613;39614;39615;39616	39616	12652	7017.7	10863	7773.7	0	5766.2
Q2VPQ9	74	Q2VPQ9	Q2VPQ9	sp|Q2VPQ9|EAF6_MOUSE Chromatin modification-related protein MEAF6 OS=Mus musculus OX=10090 GN=Meaf6 PE=1 SV=1	1	2.81323e-10	123.48	2	K	RGWDRYLTNQKNSNSKNDRRNRKFKEAERLF	X;X;X;X;X;X;X;X;X;X;Acetyl (K);X;X;X;X;Acetyl (K);X;X;X;X;X;X;X;X;X;X;X;X;X;X;X	XXXXXPPPPPPPPPPPPPPXXXXXXXXXXXX	YLTNQK(1)NSNSK(1)NDR	11	2	0.38233		39612;39613;39614;39615;39616	39616	12652	7017.7	10863	7773.7	0	5766.2
Q3TC72	202	Q3TC72	Q3TC72	sp|Q3TC72|FAHD2_MOUSE Fumarylacetoacetate hydrolase domain-containing protein 2A OS=Mus musculus OX=10090 GN=Fahd2 PE=1 SV=1	1	0.0211329	32.305	1	K	VAHDVSARDWQMRNGKQWLLGKTFDTFCPLG	X;X;X;X;X;X;X;X;X;X;X;X;X;X;X;Acetyl (K);X;X;X;X;X;X;X;X;X;X;X;X;X;X;X	XXXXXXXXXXXXXPPPPPPPPPXXXXXXXXX	NGK(1)QWLLGK	3	2	3.7912		20937;20938;20939	20939	13720	20831	0	0	0	23085
Q3THK3	407	Q3THK3	Q3THK3	sp|Q3THK3|T2FA_MOUSE General transcription factor IIF subunit 1 OS=Mus musculus OX=10090 GN=Gtf2f1 PE=1 SV=2	1	0.00929324	76.846	1	K	AEAASTSSTLRAAASKLEQGKRTSETPAAKR	X;X;X;X;X;X;X;X;X;X;X;X;X;X;X;Acetyl (K);X;X;X;X;X;X;X;X;X;X;X;X;X;X;X	XXXXXXXXXXXPPPPPPPPPPXXXXXXXXXX	AAASK(1)LEQGK	5	2	-1.0499		29;30;31;32	32	12972	0	20617	0	9034.5	6950.4
Q3TL44	934	Q3TL44	Q3TL44	sp|Q3TL44|NLRX1_MOUSE NLR family member X1 OS=Mus musculus OX=10090 GN=Nlrx1 PE=1 SV=1	1	2.08905e-05	43.02	1	K	RNVHSWDPLRVQRHLKLLLRDLEDSRGATLN	X;X;X;X;X;X;X;X;X;X;X;X;X;X;X;Acetyl (K);X;X;X;X;X;X;X;X;X;X;X;X;X;X;X	XXXXXXXXXXXXXPPPPPPPXXXXXXXXXXX	HLK(1)LLLR	3	2	0.65711		11165;11166;11167;11168;11169	11169	40612	28352	28301	0	36580	37026
Q3TL44	659	Q3TL44	Q3TL44	sp|Q3TL44|NLRX1_MOUSE NLR family member X1 OS=Mus musculus OX=10090 GN=Nlrx1 PE=1 SV=1	1	1.4141e-14	172.19	1	K	CPIKNLDALENAQAIKKKLGKLGRQVLPPSE	X;X;X;X;X;X;X;X;X;X;X;X;X;X;X;Acetyl (K);X;X;X;X;X;X;X;X;X;X;X;X;X;X;X	XXXXPPPPPPPPPPPPPXXXXXXXXXXXXXX	NLDALENAQAIK(1)K	12	2	2.8323		21188;21189	21189	28255	0	0	0	0	35107
Q3TXS7	310	Q3TXS7	Q3TXS7	sp|Q3TXS7|PSMD1_MOUSE 26S proteasome non-ATPase regulatory subunit 1 OS=Mus musculus OX=10090 GN=Psmd1 PE=1 SV=1	1	4.19523e-13	89.648	1	K	DPMETEEKTASAVAGKTPDASPEPKDQTLKM	X;X;X;X;X;X;X;X;X;X;X;X;X;X;X;Acetyl (K);X;X;X;X;X;X;X;X;X;X;X;X;X;X;X	XXXXXXXXPPPPPPPPPPPPPPPPPXXXXXX	TASAVAGK(1)TPDASPEPK	8	2	-0.48034		28232;28233;28234;28235	28235	0	3579.8	4347.1	5954.7	0	6167
Q3TXS7	720	Q3TXS7	Q3TXS7	sp|Q3TXS7|PSMD1_MOUSE 26S proteasome non-ATPase regulatory subunit 1 OS=Mus musculus OX=10090 GN=Psmd1 PE=1 SV=1	1	0.000615761	80.457	1	K	KVNQFRQLYSKVINDKHDDVMAKFGAILAQG	X;X;X;X;X;X;X;X;X;X;X;X;X;X;X;Acetyl (K);X;X;X;X;X;X;X;X;X;X;X;X;X;X;X	XXXXXXXXXXXPPPPPPPPPPPPXXXXXXXX	VINDK(1)HDDVMAK	5	2	-0.040759		36551;36552;36553;36554;36555;36556	36556	13482	13788	13712	16466	12710	10272
Q3U319	20	Q3U319	Q3U319	sp|Q3U319|BRE1B_MOUSE E3 ubiquitin-protein ligase BRE1B OS=Mus musculus OX=10090 GN=Rnf40 PE=1 SV=2	1	8.0027e-10	152.36	1	K	SNKRAAGDGGSGPPEKKMNREEKTTTTLIEP	X;X;X;X;X;X;X;X;X;X;X;X;X;X;X;Acetyl (K);X;X;X;X;X;X;X;X;X;X;X;X;X;X;X	XXXXPPPPPPPPPPPPPXXXXXXXXXXXXXX	AAGDGGSGPPEK(1)K	12	2	-1.0519		121;122;123;124;125;126	126	40105	33253	41543	34780	35254	38961
Q3UBX0	215	Q3UBX0	Q3UBX0	sp|Q3UBX0|TM109_MOUSE Transmembrane protein 109 OS=Mus musculus OX=10090 GN=Tmem109 PE=1 SV=2	1	0.00122091	49.118	1	K	SRLTGSRSSGSHLEAKVRGLERQIEELRGRQ	X;X;X;X;X;X;X;X;X;X;X;X;X;X;X;Acetyl (K);X;X;X;X;X;X;X;X;X;X;X;X;X;X;X	XXXXXXXPPPPPPPPPPPXXXXXXXXXXXXX	SSGSHLEAK(1)VR	9	2	-1.9693		26966;26967;26968;26969;26970	26970	31407	22389	21923	0	19378	6401.1
Q3UGR5	50	Q3UGR5	Q3UGR5	sp|Q3UGR5|HDHD2_MOUSE Haloacid dehalogenase-like hydrolase domain-containing protein 2 OS=Mus musculus OX=10090 GN=Hdhd2 PE=1 SV=2	1	5.6989e-12	149.7	1	K	LRATSVMVRFVTNTTKESKKDLLERLKKLEF	X;X;X;X;X;X;X;X;X;X;X;X;X;X;X;Acetyl (K);X;X;X;X;X;X;X;X;X;X;X;X;X;X;X	XXXXXXXXXPPPPPPPPPPXXXXXXXXXXXX	FVTNTTK(1)ESK	7	2	0.43732		7251;7252;7253;7254;7255;7256	7256	297980	334270	298080	243450	241160	239780
Q3UGR5	86	Q3UGR5	Q3UGR5	sp|Q3UGR5|HDHD2_MOUSE Haloacid dehalogenase-like hydrolase domain-containing protein 2 OS=Mus musculus OX=10090 GN=Hdhd2 PE=1 SV=2	1	0.00314914	60.969	1	K	EIFTSLTAARNLIEQKQVRPMLLVDDRALPE	X;X;X;X;X;X;X;X;X;X;X;X;X;X;X;Acetyl (K);X;X;X;X;X;X;X;X;X;X;X;X;X;X;X	XXXXXXXXXXPPPPPPPPPXXXXXXXXXXXX	NLIEQK(1)QVR	6	2	-2.0626		21224;21225;21226;21227;21228	21228	0	15657	20920	21454	25032	24326
Q3UHB1	285	Q3UHB1	Q3UHB1	sp|Q3UHB1|NT5D3_MOUSE 5'-nucleotidase domain-containing protein 3 OS=Mus musculus OX=10090 GN=Nt5dc3 PE=1 SV=1	1	0.0105736	39.66	1	K	EKYICYADQTRAVLAKLAAHGKKMFLITNSP	X;X;X;X;X;X;X;X;X;X;X;X;X;X;X;Acetyl (K);X;X;X;X;X;X;X;X;X;X;X;X;X;X;X	XXXXXXXXXXXPPPPPPPPPPPXXXXXXXXX	AVLAK(1)LAAHGK	5	2	0.69722		2724	2724	45872	0	0	0	0	0
Q3UHB1	364	Q3UHB1	Q3UHB1	sp|Q3UHB1|NT5D3_MOUSE 5'-nucleotidase domain-containing protein 3 OS=Mus musculus OX=10090 GN=Nt5dc3 PE=1 SV=1	1	6.61876e-06	90.819	1	K	LLWDKIHKLQKGQIYKQGNLYEFLKLTGWRG	X;X;X;X;X;X;X;X;X;X;X;X;X;X;X;Acetyl (K);X;X;X;X;X;X;X;X;X;X;X;X;X;X;X	XXXXXXXXXXXPPPPPPPPPPPPPPXXXXXX	GQIYK(1)QGNLYEFLK	5	2	-3.925		9105;9106;9107;9108;9109;9110	9110	9790.4	10259	10950	6342.9	10811	10083
Q3UHB1	306	Q3UHB1	Q3UHB1	sp|Q3UHB1|NT5D3_MOUSE 5'-nucleotidase domain-containing protein 3 OS=Mus musculus OX=10090 GN=Nt5dc3 PE=1 SV=1	1	9.27367e-38	132.2	1	K	KKMFLITNSPSSFVDKGMRYIVGKDWRDLFD	X;X;X;X;X;X;X;X;X;X;X;X;X;X;X;Acetyl (K);X;X;X;X;X;X;X;Acetyl (K);X;X;X;X;X;X;X	XXPPPPPPPPPPPPPPPPPXXXXXXXXXXXX	MFLITNSPSSFVDK(1)GMR	14	2	-0.83136		19750;19751;19752;19753;19754	19754	10114	19718	27009	0	13653	10092
Q3UHB1	246	Q3UHB1	Q3UHB1	sp|Q3UHB1|NT5D3_MOUSE 5'-nucleotidase domain-containing protein 3 OS=Mus musculus OX=10090 GN=Nt5dc3 PE=1 SV=1	1	1.83842e-11	102.7	1	K	HFLKNNIDYEPVHLYKDVKDSIRDVHIKGIM	X;X;X;X;X;X;X;X;X;X;X;X;X;X;X;Acetyl (K);X;X;X;X;X;X;X;X;X;X;X;X;X;X;X	XXXXPPPPPPPPPPPPPPPXXXXXXXXXXXX	NNIDYEPVHLYK(1)DVK	12	2	-2.2398		21391;21392;21393;21394;21395;21396	21396	108730	121710	105100	86493	94888	84988
Q3UIU2	58	Q3UIU2	Q3UIU2	sp|Q3UIU2|NDUB6_MOUSE NADH dehydrogenase [ubiquinone] 1 beta subcomplex subunit 6 OS=Mus musculus OX=10090 GN=Ndufb6 PE=1 SV=3	1	0.013296	50.15	1	K	LERFWDNFLRDGAVWKNMVFKAYRSSLFAVS	X;X;X;X;X;X;X;X;X;X;X;X;X;X;X;Acetyl (K);X;X;X;X;X;X;X;X;X;X;X;X;X;X;X	XXXXXXXXXXPPPPPPPPPPPXXXXXXXXXX	DGAVWK(1)NMVFK	6	2	-3.5921		3599;3600	3600	0	8906.7	7489	0	0	0
Q3UIU2	101	Q3UIU2	Q3UIU2	sp|Q3UIU2|NDUB6_MOUSE NADH dehydrogenase [ubiquinone] 1 beta subcomplex subunit 6 OS=Mus musculus OX=10090 GN=Ndufb6 PE=1 SV=3	1	1.14934e-06	101.1	1	K	VKYHMATKPYTIVSSKPRIFPGDTILETGEV	X;X;X;X;X;X;X;X;X;X;X;X;X;X;X;Acetyl (K);X;X;X;X;X;X;X;X;X;X;X;X;X;X;X	XXXXXXXXPPPPPPPPPPXXXXXXXXXXXXX	PYTIVSSK(1)PR	8	2	-0.34472		22990;22991;22992;22993;22994;22995	22995	35421	28038	37016	11329	14602	14380
Q3UIU2	9	Q3UIU2	Q3UIU2	sp|Q3UIU2|NDUB6_MOUSE NADH dehydrogenase [ubiquinone] 1 beta subcomplex subunit 6 OS=Mus musculus OX=10090 GN=Ndufb6 PE=1 SV=3	1	2.95635e-09	119.61	1	K	_______MSGYTPDEKLRLQQLRELRRRWLK	X;X;X;X;X;X;X;X;X;X;X;X;X;X;X;Acetyl (K);X;X;X;X;X;X;X;X;X;X;X;X;X;X;Acetyl (K)	XXXXXXXXPPPPPPPPPPXXXXXXXXXXXXX	SGYTPDEK(1)LR	8	2	1.3951		25566;25567;25568;25569;25570;25571	25571	1365600	1184000	1364000	1286700	1395200	1367400
Q3UIU2	24	Q3UIU2	Q3UIU2	sp|Q3UIU2|NDUB6_MOUSE NADH dehydrogenase [ubiquinone] 1 beta subcomplex subunit 6 OS=Mus musculus OX=10090 GN=Ndufb6 PE=1 SV=3	1	4.45315e-12	154.96	1	K	KLRLQQLRELRRRWLKDQELSPREPVLPPRR	Acetyl (K);X;X;X;X;X;X;X;X;X;X;X;X;X;X;Acetyl (K);X;X;X;X;X;X;X;X;X;X;X;X;X;X;X	XXXXXXXXXXXXXPPPPPPPPPPXXXXXXXX	WLK(1)DQELSPR	3	2	1.1571		38512;38513;38514;38515;38516;38517	38517	92762	127670	98273	135930	124390	98899
Q3ULD5	70	Q3ULD5	Q3ULD5	sp|Q3ULD5|MCCB_MOUSE Methylcrotonoyl-CoA carboxylase beta chain, mitochondrial OS=Mus musculus OX=10090 GN=Mccc2 PE=1 SV=1	1	0.028398	39.759	1	K	QLHERAQYVRLGGSEKARARHTSRGKLLPRD	X;X;X;X;X;X;X;X;X;X;X;X;X;X;X;Acetyl (K);X;X;X;X;X;X;X;X;X;X;X;X;X;X;X	XXXXXXXXXXPPPPPPPPXXXXXXXXXXXXX	LGGSEK(1)AR	6	2	-0.11578		16358;16359	16359	37733	0	0	12954	0	0
Q3ULD5	433	Q3ULD5	Q3ULD5	sp|Q3ULD5|MCCB_MOUSE Methylcrotonoyl-CoA carboxylase beta chain, mitochondrial OS=Mus musculus OX=10090 GN=Mccc2 PE=1 SV=1	1	0.00555644	60.47	1	K	IAKDGAKMVAAVACAKVPKITVIIGGSYGAG	X;X;X;X;X;X;X;X;X;X;X;X;X;X;X;Acetyl (K);X;X;X;X;X;X;X;X;X;X;X;X;X;X;X	XXXXXXXPPPPPPPPPPPPXXXXXXXXXXXX	MVAAVACAK(1)VPK	9	2	0.86234		20474;20475;20476;20477;20478	20478	24427	31002	43883	16758	22342	0
Q3UMR5	331	Q3UMR5	Q3UMR5	sp|Q3UMR5|MCU_MOUSE Calcium uniporter protein, mitochondrial OS=Mus musculus OX=10090 GN=Mcu PE=1 SV=2	1	0.000621332	88.872	1	K	YNQLKDAIAQAEMDLKRLRDPLQVHLPLRQI	X;X;X;X;X;X;X;X;X;X;X;X;X;X;X;Acetyl (K);X;X;X;X;X;X;X;X;X;X;X;X;X;X;X	XXXXXPPPPPPPPPPPPXXXXXXXXXXXXXX	DAIAQAEMDLK(1)R	11	2	-1.0543		3347;3348;3349;3350;3351	3351	55257	0	88292	29224	55803	49953
Q3UMR5	315	Q3UMR5	Q3UMR5	sp|Q3UMR5|MCU_MOUSE Calcium uniporter protein, mitochondrial OS=Mus musculus OX=10090 GN=Mcu PE=1 SV=2	1	0.0265819	54.15	1	K	LFFHKGAKKSRFDLEKYNQLKDAIAQAEMDL	X;X;X;X;X;X;X;X;X;X;X;X;X;X;X;Acetyl (K);X;X;X;X;X;X;X;X;X;X;X;X;X;X;X	XXXXXXXXXXXPPPPPPPPPPXXXXXXXXXX	FDLEK(1)YNQLK	5	2	2.7332		5836	5836	0	0	26002	0	0	0
Q3UMR5	218	Q3UMR5	Q3UMR5	sp|Q3UMR5|MCU_MOUSE Calcium uniporter protein, mitochondrial OS=Mus musculus OX=10090 GN=Mcu PE=1 SV=2	1	0.00590624	79.807	1	K	VERLEDLKQQLAPLEKVRIEISRKAEKRTTL	X;X;X;X;X;X;X;X;X;X;X;X;X;X;X;Acetyl (K);X;X;X;X;X;X;X;X;X;X;X;X;X;X;X	XXXXXXXXPPPPPPPPPPXXXXXXXXXXXXX	QQLAPLEK(1)VR	8	2	1.1339		23853;23854;23855;23856;23857;23858;23859	23859	92229	89729	90987	19987	19414	28574
Q3UQ84	384	Q3UQ84	Q3UQ84	sp|Q3UQ84|SYTM_MOUSE Threonine--tRNA ligase, mitochondrial OS=Mus musculus OX=10090 GN=Tars2 PE=1 SV=1	1	1.57278e-06	58.996	1	K	QSGHWEHYRADMFSLKPPGTDGVDNSQSGHP	X;X;X;X;X;X;X;X;X;X;X;X;X;X;X;Acetyl (K);X;X;X;X;X;X;X;X;X;X;X;X;X;X;X	XXXXXXXXXPPPPPPPPPPPPPPPPPPPPPP	ADMFSLK(1)PPGTDGVDNSQSGHPAR	7	3	-1.4087		492;493;494	494	26065	0	36058	0	11709	0
Q3URD3	782	Q3URD3	Q3URD3	sp|Q3URD3|SLMAP_MOUSE Sarcolemmal membrane-associated protein OS=Mus musculus OX=10090 GN=Slmap PE=1 SV=2	1	0.000396361	60.746	1	K	VQKEYEKTQTVLSELKLKFEMTEQEKQSITD	X;X;X;X;X;X;X;X;X;X;X;X;X;X;X;Acetyl (K);X;X;X;X;X;X;X;X;X;X;X;X;X;X;X	XXXXXXXPPPPPPPPPPPXXXXXXXXXXXXX	TQTVLSELK(1)LK	9	2	-2.5234		33046	33046	9574.9	0	0	0	0	0
Q3URE1	181	Q3URE1	Q3URE1	sp|Q3URE1|ACSF3_MOUSE Malonate--CoA ligase ACSF3, mitochondrial OS=Mus musculus OX=10090 GN=Acsf3 PE=1 SV=2	1	3.62941e-08	40.833	1	K	PLLPLTPAVYHGATEKPTEQPVEESGWRDRG	X;X;X;X;X;X;X;X;X;X;X;X;X;X;X;Acetyl (K);X;X;X;X;X;X;X;X;X;X;X;X;X;X;X	PPPPPPPPPPPPPPPPPPPPPPPPPPPPXXX	LGVPLLPLTPAVYHGATEK(1)PTEQPVEESGWR	19	3	-0.017957		16522	16522	0	0	0	0	150470	0
Q3URE1	419	Q3URE1	Q3URE1	sp|Q3URE1|ACSF3_MOUSE Malonate--CoA ligase ACSF3, mitochondrial OS=Mus musculus OX=10090 GN=Acsf3 PE=1 SV=2	1	2.37737e-06	96.334	1	K	EGNERGTKVTPGFEEKEGELLVRGPSVFREY	X;X;X;X;X;X;X;X;X;X;X;X;X;X;X;Acetyl (K);X;X;X;X;X;X;X;X;X;X;X;X;X;X;X	XXXXXXXXPPPPPPPPPPPPPPPXXXXXXXX	VTPGFEEK(1)EGELLVR	8	2	-1.7377		37711;37712;37713;37714;37715;37716	37716	43026	48089	64577	40910	48523	48920
Q3URS9	159	Q3URS9	Q3URS9	sp|Q3URS9|MITOK_MOUSE Mitochondrial potassium channel OS=Mus musculus OX=10090 GN=Ccdc51 PE=1 SV=1	1	0.00177852	16.248	1	K	YLELATLEHRMLQEEKRLRIAYLRAEDSERE	X;X;X;X;X;X;X;X;X;X;X;X;X;X;X;Acetyl (K);X;X;X;X;X;X;X;X;X;X;X;X;X;X;X	XXXXXXXXXXPPPPPPPXXXXXXXXXXXXXX	MLQEEK(1)R	6	2	-1.2735		20121;20122;20123;20124	20124	76967	0	68513	54512	63828	0
Q3UV17	351	Q3UV17	Q3UV17	sp|Q3UV17|K22O_MOUSE Keratin, type II cytoskeletal 2 oral OS=Mus musculus OX=10090 GN=Krt76 PE=1 SV=1	1	0.000489956	83.756	1	K	SIIAEVKAQYEDIAQKSKAEAEALYQTKLGE	X;X;X;X;X;X;X;X;X;X;X;X;X;X;X;Acetyl (K);X;X;X;X;X;X;X;X;X;X;X;X;X;X;X	XXXXXXXPPPPPPPPPPPXXXXXXXXXXXXX	AQYEDIAQK(1)SK	9	2	0.96512		2210;2211;2212;2213;2214;2215	2215	17797	24141	21872	13799	20888	11406
Q3V0B4	5	Q3V0B4	Q3V0B4	sp|Q3V0B4|CFA65_MOUSE Cilia- and flagella-associated protein 65 OS=Mus musculus OX=10090 GN=Cfap65 PE=1 SV=1	1	0.0216759	41.603	1	K	___________MLIQKNQCHITRTRENCDCT	X;X;X;X;X;X;X;X;X;X;X;X;X;X;X;Acetyl (K);X;X;X;X;X;X;X;X;X;X;X;X;X;X;X	XXXXXXXXXXXXPPPPPPPPPPPXXXXXXXX	LIQK(1)NQCHITR	4	2	0.69665		17145;17146	17146	0	0	0	1378100	1282500	0
Q499X9	383	Q499X9	Q499X9	sp|Q499X9|SYMM_MOUSE Methionine--tRNA ligase, mitochondrial OS=Mus musculus OX=10090 GN=Mars2 PE=1 SV=2	1	2.18986e-18	110.18	1	K	LRQGVPNWDCDYYDEKVVKLLDSELADALGG	X;X;X;X;X;X;X;X;X;X;X;X;X;X;X;Acetyl (K);X;X;X;X;X;X;X;X;X;X;X;X;X;X;X	XXPPPPPPPPPPPPPPPPPXXXXXXXXXXXX	QGVPNWDCDYYDEK(1)VVK	14	2	-0.33791		23434;23435;23436;23437;23438	23438	86845	0	74182	100490	127760	116400
Q4VAE3	83	Q4VAE3	Q4VAE3	sp|Q4VAE3|TMM65_MOUSE Transmembrane protein 65 OS=Mus musculus OX=10090 GN=Tmem65 PE=1 SV=1	1	0.00109184	62.141	1	K	DFIYSLHSTERSCLLKELHRFESIAIAQEKL	X;X;X;X;X;X;X;X;X;X;X;X;X;X;X;Acetyl (K);X;X;X;X;X;X;X;X;X;X;X;X;X;X;X	XXXXXXXXXXXPPPPPPPPPXXXXXXXXXXX	SCLLK(1)ELHR	5	2	-0.14737		24574;24575;24576;24577;24578	24578	20490	13081	8749	0	6515.8	3562.6
Q4VBD9	515	Q4VBD9	Q4VBD9	sp|Q4VBD9|GZF1_MOUSE GDNF-inducible zinc finger protein 1 OS=Mus musculus OX=10090 GN=Gzf1 PE=1 SV=2	1	0.0111485	9.1418	1	K	SKEYLKHHNRIHTGSKPFKCEVCLRTFAQRN	X;X;X;X;X;X;X;X;X;X;X;X;X;X;X;Acetyl (K);X;X;X;X;X;X;X;X;X;X;X;X;X;X;X	XXXXXXXXXXPPPPPPPPPXXXXXXXXXXXX	IHTGSK(1)PFK	6	2	-3.5758		13285;13286;13287	13287	417460	497060	462920	0	0	0
Q5M8N4	28	Q5M8N4	Q5M8N4	sp|Q5M8N4|D39U1_MOUSE Epimerase family protein SDR39U1 OS=Mus musculus OX=10090 GN=Sdr39u1 PE=1 SV=2	1	0.00229465	77.292	1	K	GTAVTQLLRGRGHEVKLVSRQPGPGRITWSE	X;X;X;X;X;X;X;X;X;X;X;X;X;X;X;Acetyl (K);X;X;X;X;X;X;X;X;X;X;X;X;X;X;X	XXXXXXXXXXXPPPPPPPPPXXXXXXXXXXX	GHEVK(1)LVSR	5	2	-0.4177		8152;8153;8154;8155;8156;8157	8157	81973	77935	66604	53719	80052	74420
Q60597	401	Q60597	Q60597	sp|Q60597|ODO1_MOUSE 2-oxoglutarate dehydrogenase, mitochondrial OS=Mus musculus OX=10090 GN=Ogdh PE=1 SV=3	1	1.58261e-66	243.84	1	K	GKTKAEQFYCGDTEGKKVMSILLHGDAAFAG	X;X;X;X;X;X;X;X;X;X;X;X;X;X;X;Acetyl (K);X;X;X;X;X;X;X;X;X;X;X;X;X;X;X	XXXXPPPPPPPPPPPPPXXXXXXXXXXXXXX	AEQFYCGDTEGK(1)K	12	2	-0.15401		646;647;648;649;650;651	651	389680	369290	366230	363170	386790	384380
Q60597	947	Q60597	Q60597	sp|Q60597|ODO1_MOUSE 2-oxoglutarate dehydrogenase, mitochondrial OS=Mus musculus OX=10090 GN=Ogdh PE=1 SV=3	1	1.42569e-09	107.52	1	K	QLSPFPFDLLLKEAQKYPNAELAWCQEEHKN	X;X;X;X;X;X;X;X;X;X;X;X;X;X;X;Acetyl (K);X;X;X;X;X;X;X;X;X;X;X;X;X;X;X	XXXXXXXXXXXXPPPPPPPPPPPPPPPPPPX	EAQK(1)YPNAELAWCQEEHK	4	2	-0.24113		4364;4365;4366;4367;4368;4369;4370;4371	4371	26869	21280	17267	11126	24724	20365
Q60597	251	Q60597	Q60597	sp|Q60597|ODO1_MOUSE 2-oxoglutarate dehydrogenase, mitochondrial OS=Mus musculus OX=10090 GN=Ogdh PE=1 SV=3	1	6.41997e-08	113.76	1	K	QKFETPGIMQFTNEEKRTLLARLVRSTRFEE	X;X;X;X;X;X;X;X;X;X;X;X;X;X;X;Acetyl (K);X;X;X;X;X;X;X;X;X;X;X;X;X;X;X	XXPPPPPPPPPPPPPPPXXXXXXXXXXXXXX	FETPGIMQFTNEEK(1)R	14	2	2.4224		5931;5932;5933;5934	5934	26188	24525	28443	0	11044	0
Q60597	697	Q60597	Q60597	sp|Q60597|ODO1_MOUSE 2-oxoglutarate dehydrogenase, mitochondrial OS=Mus musculus OX=10090 GN=Ogdh PE=1 SV=3	1	4.57214e-06	92.675	1	K	TFSHRHHVLHDQNVDKRTCIPMNHLWPNQAP	X;X;X;X;X;X;X;X;X;X;X;X;X;X;X;Acetyl (K);X;X;X;X;X;X;X;X;X;X;X;X;X;X;X	XXXXXPPPPPPPPPPPPXXXXXXXXXXXXXX	HHVLHDQNVDK(1)R	11	2	0.27902		10772;10773;10774;10775;10776;10777;10778	10778	35355	26242	29727	11133	18765	0
Q60597	943	Q60597	Q60597	sp|Q60597|ODO1_MOUSE 2-oxoglutarate dehydrogenase, mitochondrial OS=Mus musculus OX=10090 GN=Ogdh PE=1 SV=3	1	0.00525665	39.924	1	K	TRIEQLSPFPFDLLLKEAQKYPNAELAWCQE	X;X;X;X;X;X;X;X;X;X;X;X;X;X;X;Acetyl (K);X;X;X;Acetyl (K);X;X;X;X;X;X;X;X;X;X;X	XXPPPPPPPPPPPPPPPPPPXXXXXXXXXXX	IEQLSPFPFDLLLK(1)EAQK	14	2	0.34147		12839	12839	0	0	14618	0	0	0
Q60597	276	Q60597	Q60597	sp|Q60597|ODO1_MOUSE 2-oxoglutarate dehydrogenase, mitochondrial OS=Mus musculus OX=10090 GN=Ogdh PE=1 SV=3	1	0.0383082	52.32	1	K	STRFEEFLQRKWSSEKRFGLEGCEVLIPALK	X;X;X;X;X;X;X;X;X;X;X;X;X;X;X;Acetyl (K);X;X;X;X;X;X;X;X;X;X;X;X;X;X;X	XXXXXXXXXXPPPPPPPXXXXXXXXXXXXXX	KWSSEK(1)R	6	2	-1.471		15273	15273	155740	0	0	0	0	0
Q60597	970	Q60597	Q60597	sp|Q60597|ODO1_MOUSE 2-oxoglutarate dehydrogenase, mitochondrial OS=Mus musculus OX=10090 GN=Ogdh PE=1 SV=3	1	1.28508e-15	189.1	1	K	WCQEEHKNQGYYDYVKPRLRTTIDRAKPVWY	X;X;X;X;X;X;X;X;X;X;X;X;X;X;X;Acetyl (K);X;X;X;X;X;X;X;X;X;X;X;X;X;X;X	XXXXXXXPPPPPPPPPPPXXXXXXXXXXXXX	NQGYYDYVK(1)PR	9	2	1.6964		21479;21480;21481;21482;21483;21484	21484	938320	926540	1005600	749950	973720	772030
Q60597	237	Q60597	Q60597	sp|Q60597|ODO1_MOUSE 2-oxoglutarate dehydrogenase, mitochondrial OS=Mus musculus OX=10090 GN=Ogdh PE=1 SV=3	1	3.36771e-20	164.17	1	K	FMFINDLEQCQWIRQKFETPGIMQFTNEEKR	X;X;X;X;X;X;X;X;X;X;X;X;X;X;X;Acetyl (K);X;X;X;X;X;X;X;X;X;X;X;X;X;Acetyl (K);X	XXXXXXXXXXXXXXPPPPPPPPPPPPPPPPX	QK(1)FETPGIMQFTNEEK	2	2	1.2808		23607;23608;23609;23610;23611;23612	23612	76839	79651	99596	33059	51286	44089
Q60597	577	Q60597	Q60597	sp|Q60597|ODO1_MOUSE 2-oxoglutarate dehydrogenase, mitochondrial OS=Mus musculus OX=10090 GN=Ogdh PE=1 SV=3	0.999954	0.00179767	74.798	1	K	YDKICEEAFTRSKDEKILHIKHWLDSPWPGF	X;X;Acetyl (K);X;X;X;X;X;X;X;X;X;X;X;X;Acetyl (K);X;X;X;X;X;X;X;X;X;X;X;X;X;X;X	XXXXXXXXXXXPPPPPPPPPPXXXXXXXXXX	SKDEK(1)ILHIK	5	2	-0.72383		25853;25854;25855	25855	0	45879	0	0	29685	31436
Q60597	74	Q60597	Q60597	sp|Q60597|ODO1_MOUSE 2-oxoglutarate dehydrogenase, mitochondrial OS=Mus musculus OX=10090 GN=Ogdh PE=1 SV=3	1	0.00515383	50.616	1	K	EEMYCAWLENPKSVHKSWDIFFRNTNAGAPP	X;X;X;X;X;X;X;X;X;X;X;X;X;X;X;Acetyl (K);X;X;X;X;X;X;X;X;X;X;X;X;X;X;X	XXXXXXXXXXXXPPPPPPPPPPPXXXXXXXX	SVHK(1)SWDIFFR	4	2	0.54556		27469;27470;27471	27471	24011	29440	0	0	20669	0
Q60597	897	Q60597	Q60597	sp|Q60597|ODO1_MOUSE 2-oxoglutarate dehydrogenase, mitochondrial OS=Mus musculus OX=10090 GN=Ogdh PE=1 SV=3	1	8.45067e-08	116.66	1	K	QRVIPENGPAAQDPHKVKRLLFCTGKVYYDL	X;X;X;X;X;X;X;X;X;X;X;X;X;X;X;Acetyl (K);X;X;X;X;X;X;X;X;X;X;X;X;X;X;X	XXPPPPPPPPPPPPPPPPXXXXXXXXXXXXX	VIPENGPAAQDPHK(1)VK	14	2	-2.2528		36593;36594;36595;36596;36597;36598	36598	67007	80596	119030	65372	54884	71678
Q60597	564	Q60597	Q60597	sp|Q60597|ODO1_MOUSE 2-oxoglutarate dehydrogenase, mitochondrial OS=Mus musculus OX=10090 GN=Ogdh PE=1 SV=3	1	4.22145e-10	152.21	1	K	VVNQPEYEEEISKYDKICEEAFTRSKDEKIL	X;X;X;X;X;X;X;X;X;X;X;X;X;X;X;Acetyl (K);X;X;X;X;X;X;X;X;X;X;X;X;Acetyl (K);X;X	XXXXXXXXXXXXXPPPPPPPPPPPXXXXXXX	YDK(1)ICEEAFTR	3	2	0.94556		38915;38916;38917;38918;38919;38920	38920	262350	313280	252540	216760	242740	208720
Q60668	197	Q60668	Q60668	sp|Q60668|HNRPD_MOUSE Heterogeneous nuclear ribonucleoprotein D0 OS=Mus musculus OX=10090 GN=Hnrnpd PE=1 SV=2	1	7.20727e-08	83.522	1	K	KKIFVGGLSPDTPEEKIREYFGGFGEVESIE	X;X;X;X;X;X;X;X;X;X;X;X;X;X;X;Acetyl (K);X;X;X;X;X;X;X;X;X;X;X;X;X;X;X	XXPPPPPPPPPPPPPPPPXXXXXXXXXXXXX	IFVGGLSPDTPEEK(1)IR	14	2	2.2159		12946;12947;12948	12948	9020.4	10031	5078.1	0	0	0
Q60714	624	Q60714	Q60714	sp|Q60714|S27A1_MOUSE Long-chain fatty acid transport protein 1 OS=Mus musculus OX=10090 GN=Slc27a1 PE=1 SV=1	1	0.00151791	93.291	1	K	FDPRQTSDRLFFLDLKQGRYVPLDERVHARI	X;X;X;X;X;X;X;X;X;X;X;X;X;X;X;Acetyl (K);X;X;X;X;X;X;X;X;X;X;X;X;X;X;X	XXXXXXXXXPPPPPPPPPPXXXXXXXXXXXX	LFFLDLK(1)QGR	7	2	0.54759		16103	16103	0	0	5123.7	0	0	0
Q60759	361	Q60759	Q60759	sp|Q60759|GCDH_MOUSE Glutaryl-CoA dehydrogenase, mitochondrial OS=Mus musculus OX=10090 GN=Gcdh PE=1 SV=2	1	0.00168894	89.789	1	K	GLHACLQLGRLKDQDKATPEMVSMLKRNNCG	X;X;X;X;X;X;X;X;X;X;X;X;X;X;X;Acetyl (K);X;X;X;X;X;X;X;X;X;X;X;X;X;X;X	XXXXXXXXXXPPPPPPPPPPPPPPPPXXXXX	DQDK(1)ATPEMVSMLK	4	2	-1.3961		4017;4018;4019;4020;17216;17217	4020	0	18343	16675	16501	17505	0
Q60766	262	Q60766	Q60766	sp|Q60766|IRGM1_MOUSE Immunity-related GTPase family M protein 1 OS=Mus musculus OX=10090 GN=Irgm1 PE=1 SV=1	1	0.0260939	52.172	1	K	TLHKDLSNIRCCEPLKTLYGTYEKIVGDKVA	X;X;X;X;X;X;X;X;X;X;X;X;X;X;X;Acetyl (K);X;X;X;X;X;X;X;X;X;X;X;X;Acetyl (K);X;X	XXXXXXXXXXPPPPPPPPPPPPPPXXXXXXX	CCEPLK(1)TLYGTYEK	6	2	-0.21208		3026	3026	0	0	0	0	0	11409
Q60766	275	Q60766	Q60766	sp|Q60766|IRGM1_MOUSE Immunity-related GTPase family M protein 1 OS=Mus musculus OX=10090 GN=Irgm1 PE=1 SV=1	1	0.0228187	49.28	1	K	PLKTLYGTYEKIVGDKVAVWKQRIANESLKN	X;X;Acetyl (K);X;X;X;X;X;X;X;X;X;X;X;X;Acetyl (K);X;X;X;X;X;X;X;X;X;X;X;X;X;X;X	XXXXXXXXXXXPPPPPPPPPPXXXXXXXXXX	IVGDK(1)VAVWK	5	2	-3.0315		14508	14508	19836	0	0	0	0	0
Q60854	177	Q60854	Q60854	sp|Q60854|SPB6_MOUSE Serpin B6 OS=Mus musculus OX=10090 GN=Serpinb6 PE=1 SV=1	1	0.0211329	56.05	1	K	SLVLVNAIYFKGNWEKQFNKEHTREMPFKVS	X;X;X;X;X;X;X;X;X;X;X;X;X;X;X;Acetyl (K);X;X;X;X;X;X;X;X;X;X;X;X;X;X;X	XXXXXXXXXXXPPPPPPPPPXXXXXXXXXXX	GNWEK(1)QFNK	5	2	-0.56497		9027;9028	9028	17555	0	13203	0	0	0
Q60864	364	Q60864	Q60864	sp|Q60864|STIP1_MOUSE Stress-induced-phosphoprotein 1 OS=Mus musculus OX=10090 GN=Stip1 PE=1 SV=1	1	1.25428e-06	121.4	1	K	QERLAYINPDLALEEKNKGNECFQKGDYPQA	X;X;X;X;X;X;X;X;X;X;X;X;X;X;X;Acetyl (K);X;X;X;X;X;X;X;X;X;X;X;X;X;X;X	XXXPPPPPPPPPPPPPPPXXXXXXXXXXXXX	LAYINPDLALEEK(1)NK	13	2	0.86403		15592;15593;15594	15594	14873	14112	0	0	0	1781.6
Q60864	8	Q60864	Q60864	sp|Q60864|STIP1_MOUSE Stress-induced-phosphoprotein 1 OS=Mus musculus OX=10090 GN=Stip1 PE=1 SV=1	1	0.0101855	57.788	1	K	________MEQVNELKEKGNKALSAGNIDDA	X;X;X;X;X;X;X;X;X;X;X;X;X;X;X;Acetyl (K);X;X;X;X;X;X;X;X;X;X;X;X;X;X;X	XXXXXXXXPPPPPPPPPPXXXXXXXXXXXXX	MEQVNELK(1)EK	8	2	1.6656		19688	19688	6014.8	0	0	0	0	0
Q60870	12	Q60870	Q60870	sp|Q60870|REEP5_MOUSE Receptor expression-enhancing protein 5 OS=Mus musculus OX=10090 GN=Reep5 PE=1 SV=1	1	0.00357274	53.462	1	K	____MRERFDRFLHEKNCMTDLLAKLEAKTG	X;X;X;X;X;X;X;X;X;X;X;X;X;X;X;Acetyl (K);X;X;X;X;X;X;X;X;Acetyl (K);X;X;X;Acetyl (K);X;X	XXXXXXXXXXXPPPPPPPPPPPPPPXXXXXX	FLHEK(1)NCMTDLLAK	5	2	-0.55273		6608	6608	16522	0	0	0	0	0
Q60870	21	Q60870	Q60870	sp|Q60870|REEP5_MOUSE Receptor expression-enhancing protein 5 OS=Mus musculus OX=10090 GN=Reep5 PE=1 SV=1	1	3.9076e-10	153.17	1	K	DRFLHEKNCMTDLLAKLEAKTGVNRSFIALG	X;X;X;X;X;X;X;X;X;X;X;X;X;X;X;Acetyl (K);X;X;X;Acetyl (K);X;X;X;X;X;X;X;X;X;X;X	XXXXXXXPPPPPPPPPPPPPXXXXXXXXXXX	NCMTDLLAK(1)LEAK	9	2	-2.7408		20773	20773	0	0	13514	0	0	0
Q60870	153	Q60870	Q60870	sp|Q60870|REEP5_MOUSE Receptor expression-enhancing protein 5 OS=Mus musculus OX=10090 GN=Reep5 PE=1 SV=1	1	0.000275651	94.192	1	K	RPIFLRHESQVDSVVKDVKDKAKETADAISK	X;X;X;X;X;X;X;X;X;X;X;X;X;X;X;Acetyl (K);X;X;X;X;X;X;X;X;X;X;X;X;X;X;X	XXXXXXPPPPPPPPPPPPPXXXXXXXXXXXX	HESQVDSVVK(1)DVK	10	2	-3.1733		10160	10160	0	5554.3	0	0	0	0
Q60870	25	Q60870	Q60870	sp|Q60870|REEP5_MOUSE Receptor expression-enhancing protein 5 OS=Mus musculus OX=10090 GN=Reep5 PE=1 SV=1	1	5.18315e-06	86.622	1	K	HEKNCMTDLLAKLEAKTGVNRSFIALGVIGL	X;X;Acetyl (K);X;X;X;X;X;X;X;X;X;X;X;X;Acetyl (K);X;X;X;X;X;X;X;X;X;X;X;X;X;X;X	XXXXXXXXXXXXPPPPPPPPPXXXXXXXXXX	LEAK(1)TGVNR	4	2	-0.57411		15800;15801;15802;15803;15804	15804	57926	0	164880	11444	122550	6101.5
Q60930	236	Q60930	Q60930	sp|Q60930|VDAC2_MOUSE Voltage-dependent anion-selective channel protein 2 OS=Mus musculus OX=10090 GN=Vdac2 PE=1 SV=2	1	8.20321e-06	60.842	1	K	AWTSGTNCTRFGIAAKYQLDPTASISAKVNN	X;X;X;X;X;X;X;X;X;X;X;X;X;X;X;Acetyl (K);X;X;X;X;X;X;X;X;X;X;X;X;X;X;X	XXXXXXXXXXPPPPPPPPPPPPPPPPPPXXX	FGIAAK(1)YQLDPTASISAK	6	2	-0.59271		6148;6149	6149	0	0	19965	0	7245.1	0
Q60930	40	Q60930	Q60930	sp|Q60930|VDAC2_MOUSE Voltage-dependent anion-selective channel protein 2 OS=Mus musculus OX=10090 GN=Vdac2 PE=1 SV=2	1	0.000234475	110.39	1	K	AARDIFNKGFGFGLVKLDVKTKSCSGVEFST	X;X;X;X;X;X;X;X;X;X;X;X;X;X;X;Acetyl (K);X;X;X;X;X;X;X;X;X;X;X;X;X;X;X	XXXXXXXXPPPPPPPPPPPPXXXXXXXXXXX	GFGFGLVK(1)LDVK	8	2	-2.0244		7870;7871;7872;7873;7874;7875;7876	7876	41465	70841	126430	61253	93766	60667
Q60930	121	Q60930	Q60930	sp|Q60930|VDAC2_MOUSE Voltage-dependent anion-selective channel protein 2 OS=Mus musculus OX=10090 GN=Vdac2 PE=1 SV=2	1	0.00891807	77.286	1	K	GLKLTFDTTFSPNTGKKSGKIKSAYKRECIN	X;X;X;X;X;X;X;X;X;X;X;X;X;X;X;Acetyl (K);X;X;X;X;X;X;X;X;X;X;X;X;X;X;X	XXXPPPPPPPPPPPPPPXXXXXXXXXXXXXX	LTFDTTFSPNTGK(1)K	13	2	-1.5482		18779;18780	18780	53865	58209	0	0	0	0
Q60930	24	Q60930	Q60930	sp|Q60930|VDAC2_MOUSE Voltage-dependent anion-selective channel protein 2 OS=Mus musculus OX=10090 GN=Vdac2 PE=1 SV=2	1	2.16374e-05	81.688	1	K	CPRPMCIPPPYADLGKAARDIFNKGFGFGLV	X;X;X;X;X;X;X;X;X;X;X;X;X;X;X;Acetyl (K);X;X;X;X;X;X;X;X;X;X;X;X;X;X;X	XXXPPPPPPPPPPPPPPPPXXXXXXXXXXXX	PMCIPPPYADLGK(1)AAR	13	2	0.33923		22490;22491;22492;22493;22494;22495;22496;22497;22498;22499;22500;22501	22501	5031.8	166160	202240	193290	202980	173700
Q60930	73	Q60930	Q60930	sp|Q60930|VDAC2_MOUSE Voltage-dependent anion-selective channel protein 2 OS=Mus musculus OX=10090 GN=Vdac2 PE=1 SV=2	1	0.000149803	124.14	1	K	SSNTDTGKVSGTLETKYKWCEYGLTFTEKWN	X;X;X;X;X;X;X;X;X;X;X;X;X;X;X;Acetyl (K);X;Acetyl (K);X;X;X;X;X;X;X;X;X;X;X;X;X	XXXXXXXXPPPPPPPPPPXXXXXXXXXXXXX	VSGTLETK(1)YK	8	2	-0.30218		37487;37488;37489;37490;37491;37492	37492	240810	200940	219750	201790	215190	165230
Q60930	75	Q60930	Q60930	sp|Q60930|VDAC2_MOUSE Voltage-dependent anion-selective channel protein 2 OS=Mus musculus OX=10090 GN=Vdac2 PE=1 SV=2	1	2.98127e-15	203	1	K	NTDTGKVSGTLETKYKWCEYGLTFTEKWNTD	X;X;X;X;X;X;X;X;X;X;X;X;X;X;X;Acetyl (K);X;X;X;X;X;X;X;X;X;X;X;X;X;X;X	XXXXXXXXXXXXXXPPPPPPPPPPPPPXXXX	YK(1)WCEYGLTFTEK	2	2	-0.48664		39493;39494;39495;39496;39497;39498	39498	419900	845290	1215100	829300	912960	608970
Q60931	61	Q60931	Q60931	sp|Q60931|VDAC3_MOUSE Voltage-dependent anion-selective channel protein 3 OS=Mus musculus OX=10090 GN=Vdac3 PE=1 SV=1	1	0.00349859	78.021	1	K	HAYTDTGKASGNLETKYKVCNYGLTFTQKWN	X;X;X;X;X;X;X;X;X;X;X;X;X;X;X;Acetyl (K);X;Acetyl (K);X;X;X;X;X;X;X;X;X;X;X;X;X	XXXXXXXXPPPPPPPPPPXXXXXXXXXXXXX	ASGNLETK(1)YK	8	2	-0.29151		2310;2311;2312;2313;2314	2314	215250	234610	0	217470	222110	193920
Q60931	63	Q60931	Q60931	sp|Q60931|VDAC3_MOUSE Voltage-dependent anion-selective channel protein 3 OS=Mus musculus OX=10090 GN=Vdac3 PE=1 SV=1	1	3.17444e-53	231.21	1	K	YTDTGKASGNLETKYKVCNYGLTFTQKWNTD	X;X;X;X;X;X;X;X;X;X;X;X;X;X;X;Acetyl (K);X;X;X;X;X;X;X;X;X;X;X;X;X;X;X	XXXXXXXXXXXXXXPPPPPPPPPPPPPXXXX	YK(1)VCNYGLTFTQK	2	2	-0.48801		39487;39488;39489;39490;39491;39492	39492	323000	407940	282250	329840	365740	290450
Q60931	12	Q60931	Q60931	sp|Q60931|VDAC3_MOUSE Voltage-dependent anion-selective channel protein 3 OS=Mus musculus OX=10090 GN=Vdac3 PE=1 SV=1	1	9.83909e-17	203.14	1	K	____MCNTPTYCDLGKAAKDVFNKGYGFGMV	X;X;X;X;X;X;X;X;X;X;X;X;X;X;X;Acetyl (K);X;X;X;X;X;X;X;X;X;X;X;X;X;X;X	XXXXXPPPPPPPPPPPPPPXXXXXXXXXXXX	CNTPTYCDLGK(1)AAK	11	2	1.5614		3187;3188;3189;3190;3191;3192;3193;3194;3195;3196;3197;3198;3199;3200	3200	9136800	9011900	9056600	5476.8	9585700	8937300
Q60931	28	Q60931	Q60931	sp|Q60931|VDAC3_MOUSE Voltage-dependent anion-selective channel protein 3 OS=Mus musculus OX=10090 GN=Vdac3 PE=1 SV=1	1	0.00101852	67.123	1	K	AAKDVFNKGYGFGMVKIDLKTKSCSGVEFST	X;X;X;X;X;X;X;X;X;X;X;X;X;X;X;Acetyl (K);X;X;X;X;X;X;X;X;X;X;X;X;X;X;X	XXXXXXXXPPPPPPPPPPPPXXXXXXXXXXX	GYGFGMVK(1)IDLK	8	2	-0.22953		9865;9866;9867;9868	9868	0	37713	69412	36794	38837	0
Q60931	109	Q60931	Q60931	sp|Q60931|VDAC3_MOUSE Voltage-dependent anion-selective channel protein 3 OS=Mus musculus OX=10090 GN=Vdac3 PE=1 SV=1	1	1.0171e-07	105.43	1	K	GLKLTLDTIFVPNTGKKSGKLKASYRRDCFS	X;X;X;X;X;X;X;X;X;X;X;X;X;X;X;Acetyl (K);X;X;X;X;X;X;X;X;X;X;X;X;X;X;X	XXXPPPPPPPPPPPPPPXXXXXXXXXXXXXX	LTLDTIFVPNTGK(1)K	13	2	-2.0386		18840;18841;18842;18843;18844;18845	18845	42263	51957	40926	45566	46020	31961
Q60931	163	Q60931	Q60931	sp|Q60931|VDAC3_MOUSE Voltage-dependent anion-selective channel protein 3 OS=Mus musculus OX=10090 GN=Vdac3 PE=1 SV=1	1	2.55167e-31	168.63	1	K	GWLAGYQMSFDTAKSKLSQNNFALGYKAADF	X;X;X;X;X;X;X;X;X;X;X;X;X;X;X;Acetyl (K);X;X;X;X;X;X;X;X;X;X;X;X;X;X;X	XXXXXXXXXXXXXXPPPPPPPPPPPPPXXXX	SK(1)LSQNNFALGYK	2	2	-0.12666		25865;25866;25867;25868;25869;25870	25870	126860	66871	114010	45426	99239	71969
Q60932	237	Q60932	Q60932	sp|Q60932|VDAC1_MOUSE Voltage-dependent anion-selective channel protein 1 OS=Mus musculus OX=10090 GN=Vdac1 PE=1 SV=3	1	2.7552e-24	162.63	1	K	AWTAGNSNTRFGIAAKYQVDPDACFSAKVNN	X;X;X;X;X;X;X;X;X;X;X;X;X;X;X;Acetyl (K);X;X;X;X;X;X;X;X;X;X;X;X;X;X;X	XXXXXXXXXXPPPPPPPPPPPPPPPPPPXXX	FGIAAK(1)YQVDPDACFSAK	6	2	-1.9576		6150;6151;6152;6153;6154;6155	6155	938600	1852300	3901600	1666700	2100500	1837400
Q60932	109	Q60932	Q60932	sp|Q60932|VDAC1_MOUSE Voltage-dependent anion-selective channel protein 1 OS=Mus musculus OX=10090 GN=Vdac1 PE=1 SV=3	1	3.07965e-12	134.79	1	K	LGTEITVEDQLARGLKLTFDSSFSPNTGKKN	X;X;X;X;X;X;X;X;X;X;X;X;X;X;X;Acetyl (K);X;X;X;X;X;X;X;X;X;X;X;X;Acetyl (K);X;X	XXXXXXXXXXXXXPPPPPPPPPPPPPPPPXX	GLK(1)LTFDSSFSPNTGK	3	2	0.49887		8750;8751	8751	0	8805.7	43216	0	0	0
Q60932	122	Q60932	Q60932	sp|Q60932|VDAC1_MOUSE Voltage-dependent anion-selective channel protein 1 OS=Mus musculus OX=10090 GN=Vdac1 PE=1 SV=3	1	6.46387e-11	131.47	1	K	GLKLTFDSSFSPNTGKKNAKIKTGYKREHIN	X;X;X;X;X;X;X;X;X;X;X;X;X;X;X;Acetyl (K);X;X;X;X;X;X;X;X;X;X;X;X;X;X;X	XXXPPPPPPPPPPPPPPXXXXXXXXXXXXXX	LTFDSSFSPNTGK(1)K	13	2	0.51512		18768;18769;18770;18771;18772;18773	18773	95026	125310	108940	91235	96137	80281
Q60932	41	Q60932	Q60932	sp|Q60932|VDAC1_MOUSE Voltage-dependent anion-selective channel protein 1 OS=Mus musculus OX=10090 GN=Vdac1 PE=1 SV=3	1	4.70711e-07	123.92	1	K	SARDVFTKGYGFGLIKLDLKTKSENGLEFTS	X;X;X;X;X;X;X;X;X;X;X;X;X;X;X;Acetyl (K);X;X;X;X;X;X;X;X;X;X;X;X;X;X;X	XXXXXXXXPPPPPPPPPPPPXXXXXXXXXXX	GYGFGLIK(1)LDLK	8	2	-2.9194		9858;9859;9860;9861;9862;9863	9863	20919	41236	81873	41282	51903	39971
Q60932	287	Q60932	Q60932	sp|Q60932|VDAC1_MOUSE Voltage-dependent anion-selective channel protein 1 OS=Mus musculus OX=10090 GN=Vdac1 PE=1 SV=3	1	0.000117796	72.44	1	K	LSALLDGKNVNAGGHKLGLGLEFQA______	X;X;X;X;X;X;X;X;X;X;X;X;X;X;X;Acetyl (K);X;X;X;X;X;X;X;X;X;X;X;X;X;X;X	XXXXXXXXPPPPPPPPPPPPPPPPPXXXXXX	NVNAGGHK(1)LGLGLEFQA	8	2	-1.9409		21750;21751;21752	21752	0	14165	0	7824.9	12688	0
Q60932	74	Q60932	Q60932	sp|Q60932|VDAC1_MOUSE Voltage-dependent anion-selective channel protein 1 OS=Mus musculus OX=10090 GN=Vdac1 PE=1 SV=3	1	1.10594e-08	149.72	1	K	SANTETTKVNGSLETKYRWTEYGLTFTEKWN	X;X;X;X;X;X;X;X;X;X;X;X;X;X;X;Acetyl (K);X;X;X;X;X;X;X;X;X;X;X;X;X;X;X	XXXXXXXXPPPPPPPPPPXXXXXXXXXXXXX	VNGSLETK(1)YR	8	2	-1.1298		37206;37207;37208;37209;37210;37211	37211	217910	218010	150770	193500	183700	175630
Q60932	265	Q60932	Q60932	sp|Q60932|VDAC1_MOUSE Voltage-dependent anion-selective channel protein 1 OS=Mus musculus OX=10090 GN=Vdac1 PE=1 SV=3	1	3.17811e-94	266.12	1	K	VNNSSLIGLGYTQTLKPGIKLTLSALLDGKN	X;X;X;X;X;X;X;X;X;X;X;X;X;X;X;Acetyl (K);X;X;X;X;X;X;X;X;X;X;X;X;X;X;X	PPPPPPPPPPPPPPPPPPPPXXXXXXXXXXX	VNNSSLIGLGYTQTLK(1)PGIK	16	2	-3.4589		37267;37268;37269;37270;37271;37272;37273;37274	37274	743950	811130	1025300	461060	1109900	884350
Q61026	640	Q61026	Q61026	sp|Q61026|NCOA2_MOUSE Nuclear receptor coactivator 2 OS=Mus musculus OX=10090 GN=Ncoa2 PE=1 SV=3	1	7.05348e-05	129.5	1	K	RAEGHSRLHDSKGQTKLLQLLTTKSDQMEPS	X;X;X;X;X;X;X;X;X;X;X;X;X;X;X;Acetyl (K);X;X;X;X;X;X;X;X;X;X;X;X;X;X;X	XXXXXXXXXXXXPPPPPPPPPPPPXXXXXXX	GQTK(1)LLQLLTTK	4	2	-1.4526		9159;9160;9161;9162	9162	11886	13291	15254	0	11677	0
Q61026	780	Q61026	Q61026	sp|Q61026|NCOA2_MOUSE Nuclear receptor coactivator 2 OS=Mus musculus OX=10090 GN=Ncoa2 PE=1 SV=3	1	7.6895e-10	165.61	1	K	KLERLDSKTDPASNTKLIAMKTVKEEVSFEP	X;X;X;X;X;X;X;X;X;X;X;X;X;X;X;Acetyl (K);X;X;X;X;X;X;X;X;X;X;X;X;X;X;X	XXXXXXXXPPPPPPPPPPPPPXXXXXXXXXX	TDPASNTK(1)LIAMK	8	2	0.9389		28786;28787;28788;28789;28790;28791;28792;28793;28794;28795;28796;28797	28797	82635	59896	85248	74486	76267	81339
Q61102	350	Q61102	Q61102	sp|Q61102|ABCB7_MOUSE Iron-sulfur clusters transporter ABCB7, mitochondrial OS=Mus musculus OX=10090 GN=Abcb7 PE=1 SV=3	1	2.14135e-15	154.9	1	K	DSLLNYETVKYFNNEKYEAQRYDGFLKTYET	X;X;X;X;X;X;X;X;X;X;X;X;X;X;X;Acetyl (K);X;X;X;X;X;X;X;X;X;X;X;X;X;X;X	XXXXXXXXXXPPPPPPPPPPPXXXXXXXXXX	YFNNEK(1)YEAQR	6	2	-1.4157		39157;39158;39159;39160;39161;39162	39162	54583	53663	47332	40305	51401	54090
Q61191	288	Q61191	Q61191	sp|Q61191|HCFC1_MOUSE Host cell factor 1 OS=Mus musculus OX=10090 GN=Hcfc1 PE=1 SV=2	1	0.00505238	64.388	1	K	WVPLVMDDVKVATHEKEWKCTNTLACLNLDT	X;X;X;X;X;X;X;X;X;X;X;X;X;X;X;Acetyl (K);X;X;X;X;X;X;X;X;X;X;X;X;X;X;X	XXXXXXXXXXPPPPPPPPPXXXXXXXXXXXX	VATHEK(1)EWK	6	2	-1.1313		35431;35432;35433;35434;35435	35435	45365	0	45505	58519	50868	47525
Q61316	272	Q61316	Q61316	sp|Q61316|HSP74_MOUSE Heat shock 70 kDa protein 4 OS=Mus musculus OX=10090 GN=Hspa4 PE=1 SV=1	1	0.0206033	50.428	1	K	KSKIRALLRLSQECEKLKKLMSANASDLPLS	X;X;X;X;X;X;X;X;X;X;X;X;X;X;X;Acetyl (K);X;X;X;X;X;X;X;X;X;X;X;X;X;X;X	XXXXXXXXXPPPPPPPPPXXXXXXXXXXXXX	LSQECEK(1)LK	7	2	0.74829		18609;18610;18611;18612;18613	18613	21821	19941	15556	11988	13180	0
Q61316	53	Q61316	Q61316	sp|Q61316|HSP74_MOUSE Heat shock 70 kDa protein 4 OS=Mus musculus OX=10090 GN=Hspa4 PE=1 SV=1	1	1.07368e-06	96.567	1	K	CVSFGPKNRSIGAAAKSQVISNAKNTVQGFK	X;X;X;X;X;X;X;X;X;X;X;X;X;X;X;Acetyl (K);X;X;X;X;X;X;X;X;X;X;X;X;X;X;X	XXXXXXXXXPPPPPPPPPPPPPPPXXXXXXX	SIGAAAK(1)SQVISNAK	7	2	-1.2006		25691	25691	3801.6	0	0	0	0	0
Q61316	477	Q61316	Q61316	sp|Q61316|HSP74_MOUSE Heat shock 70 kDa protein 4 OS=Mus musculus OX=10090 GN=Hspa4 PE=1 SV=1	1	0.0222132	55.376	1	K	FSVQKVTPQSDGSSSKVKVKVRVNVHGIFSV	X;X;X;X;X;X;X;X;X;X;X;X;X;X;X;Acetyl (K);X;X;X;X;X;X;X;X;X;X;X;X;X;X;X	XXXXXPPPPPPPPPPPPPXXXXXXXXXXXXX	VTPQSDGSSSK(1)VK	11	2	-1.4538		37717;37718;37719;37720;37721	37721	16871	19590	10503	10850	0	8882
Q61335	203	Q61335	Q61335	sp|Q61335|BAP31_MOUSE B-cell receptor-associated protein 31 OS=Mus musculus OX=10090 GN=Bcap31 PE=1 SV=4	1	0.000473192	66.282	1	K	RKLKDELASTKKKLEKAENEALAMQKQSEGL	X;X;X;X;X;X;X;X;X;X;X;X;X;X;X;Acetyl (K);X;X;X;X;X;X;X;X;X;X;X;X;X;X;X	XXXXXXXXXXXXXPPPPPPPPPPPPPXXXXX	LEK(1)AENEALAMQK	3	2	-0.96589		15930;15931;15932	15932	8121.6	0	0	4852.7	5599	0
Q61425	185	Q61425	Q61425	sp|Q61425|HCDH_MOUSE Hydroxyacyl-coenzyme A dehydrogenase, mitochondrial OS=Mus musculus OX=10090 GN=Hadh PE=1 SV=2	1	0.000232927	101.33	1	K	HFFNPVPMMKLVEVIKTPMTSQKTFESLVDF	X;X;X;X;X;X;X;Oxidation (M);Oxidation (M);X;X;X;X;X;X;Acetyl (K);X;X;Oxidation (M);X;X;X;Acetyl (K);X;X;X;X;X;X;X;X	XXXXXXXXXXPPPPPPPPPPPPPXXXXXXXX	LVEVIK(1)TPMTSQK	6	2	-0.44164		18993;18994;18995;18996;18997;18998;18999;19000;19001	19001	41808	42743	49842	42776	40295	48961
Q61425	87	Q61425	Q61425	sp|Q61425|HCDH_MOUSE Hydroxyacyl-coenzyme A dehydrogenase, mitochondrial OS=Mus musculus OX=10090 GN=Hadh PE=1 SV=2	1	0.017894	87.76	1	K	ESLKRMAKKKFTENPKAGDEFVEKTLSCLST	X;X;X;Acetyl (K);X;X;X;X;X;X;X;X;X;X;X;Acetyl (K);X;X;X;X;X;X;X;X;X;X;X;X;X;X;X	XXXXXXXXXXPPPPPPPPPPPPPPXXXXXXX	FTENPK(1)AGDEFVEK	6	2	0.16463		7114	7114	0	5563.4	0	0	0	0
Q61425	241	Q61425	Q61425	sp|Q61425|HCDH_MOUSE Hydroxyacyl-coenzyme A dehydrogenase, mitochondrial OS=Mus musculus OX=10090 GN=Hadh PE=1 SV=2	1	1.12785e-09	165.22	1	K	YLIEAVRLHERGDASKEDIDTAMKLGAGYPM	X;X;X;X;X;X;X;X;X;X;X;X;X;X;X;Acetyl (K);X;X;X;X;X;X;X;X;X;X;X;X;X;X;X	XXXXXXXXXXXPPPPPPPPPPPPPXXXXXXX	GDASK(1)EDIDTAMK	5	2	-0.5906		7592;7593;7594;7595;7596;7597	7597	37346	56023	41823	56121	41459	33405
Q61425	75	Q61425	Q61425	sp|Q61425|HCDH_MOUSE Hydroxyacyl-coenzyme A dehydrogenase, mitochondrial OS=Mus musculus OX=10090 GN=Hadh PE=1 SV=2	1	0.000292315	35.904	1	K	EDILAKSKKGIEESLKRMAKKKFTENPKAGD	X;X;X;X;X;X;X;X;X;X;X;X;X;X;X;Acetyl (K);X;X;X;X;X;Acetyl (K);X;X;X;X;X;Acetyl (K);X;X;X	XXXXXXXXPPPPPPPPPXXXXXXXXXXXXXX	GIEESLK(1)R	7	2	-1.1912		8294;8295;8296;8297;8298;14986;14987;14988;14989	8298	676820	538570	471170	296940	0	341870
Q61425	212	Q61425	Q61425	sp|Q61425|HCDH_MOUSE Hydroxyacyl-coenzyme A dehydrogenase, mitochondrial OS=Mus musculus OX=10090 GN=Hadh PE=1 SV=2	1	0.000823182	55.201	1	K	LVDFCKTLGKHPVSCKDTPGFIVNRLLVPYL	X;X;X;X;X;Acetyl (K);X;X;X;X;X;X;X;X;X;Acetyl (K);X;X;X;X;X;X;X;X;X;X;X;X;X;X;X	XXXXXXXXXXPPPPPPPPPPPPPPPXXXXXX	HPVSCK(1)DTPGFIVNR	6	2	0.54689		11612;11613;11614	11614	0	0	47999	0	27430	18847
Q61425	81	Q61425	Q61425	sp|Q61425|HCDH_MOUSE Hydroxyacyl-coenzyme A dehydrogenase, mitochondrial OS=Mus musculus OX=10090 GN=Hadh PE=1 SV=2	1	7.8448e-06	97.793	1	K	SKKGIEESLKRMAKKKFTENPKAGDEFVEKT	X;X;X;X;X;X;X;X;X;Acetyl (K);X;X;X;X;X;Acetyl (K);X;X;X;X;X;Acetyl (K);X;X;X;X;X;X;X;X;X	XXXXXXXXXXXXXXXPPPPPPPXXXXXXXXX	K(1)FTENPK	1	2	-0.56831		14933;14934;14935;14936;14937;14938	14938	1799300	1473700	1522300	1109400	1619200	1453000
Q61425	192	Q61425	Q61425	sp|Q61425|HCDH_MOUSE Hydroxyacyl-coenzyme A dehydrogenase, mitochondrial OS=Mus musculus OX=10090 GN=Hadh PE=1 SV=2	1	1.16878e-23	162.35	1	K	MMKLVEVIKTPMTSQKTFESLVDFCKTLGKH	Oxidation (M);Oxidation (M);X;X;X;X;X;X;X;X;X;X;X;X;X;Acetyl (K);X;X;X;X;X;X;X;X;X;Acetyl (K);X;X;X;Acetyl (K);X	XXXXXXXXXPPPPPPPPPPPPPPPPPXXXXX	TPMTSQK(1)TFESLVDFCK	7	2	1.3836		32586;32587;32588;32589;32590;32591;32592	32592	7145.3	10762	204790	10621	21380	18235
Q61425	202	Q61425	Q61425	sp|Q61425|HCDH_MOUSE Hydroxyacyl-coenzyme A dehydrogenase, mitochondrial OS=Mus musculus OX=10090 GN=Hadh PE=1 SV=2	1	7.96978e-23	199.75	1	K	PMTSQKTFESLVDFCKTLGKHPVSCKDTPGF	X;Oxidation (M);X;X;X;X;X;X;X;X;X;X;X;X;X;Acetyl (K);X;X;X;Acetyl (K);X;X;X;X;X;Acetyl (K);X;X;X;X;X	XXXXXXPPPPPPPPPPPPPPXXXXXXXXXXX	TFESLVDFCK(1)TLGK	10	2	-0.90964		29311;29312;29313;29314;29315;29316	29316	460550	1010300	1603400	756460	871310	863470
Q61425	206	Q61425	Q61425	sp|Q61425|HCDH_MOUSE Hydroxyacyl-coenzyme A dehydrogenase, mitochondrial OS=Mus musculus OX=10090 GN=Hadh PE=1 SV=2	1	0.000134379	98.975	1	K	QKTFESLVDFCKTLGKHPVSCKDTPGFIVNR	X;Acetyl (K);X;X;X;X;X;X;X;X;X;X;X;X;X;Acetyl (K);X;X;X;X;X;Acetyl (K);X;X;X;X;X;X;X;X;X	XXXXXXXXXXXXPPPPPPPPPPXXXXXXXXX	TLGK(1)HPVSCK	4	2	-1.2964		31350;31351	31351	0	0	171050	0	156250	0
Q61425	312	Q61425	Q61425	sp|Q61425|HCDH_MOUSE Hydroxyacyl-coenzyme A dehydrogenase, mitochondrial OS=Mus musculus OX=10090 GN=Hadh PE=1 SV=2	1	0.0273949	51.351	1	K	VAQKKLGKKTGEGFYKYK_____________	X;X;X;X;X;X;X;X;X;X;X;X;X;X;X;Acetyl (K);X;X;X;X;X;X;X;X;X;X;X;X;X;X;X	XXXXXXXXXPPPPPPPPPXXXXXXXXXXXXX	TGEGFYK(1)YK	7	2	-1.4776		29832;29833;29834;29835;29836	29836	120730	135280	0	31382	56867	38540
Q61578	290	Q61578	Q61578	sp|Q61578|ADRO_MOUSE NADPH:adrenodoxin oxidoreductase, mitochondrial OS=Mus musculus OX=10090 GN=Fdxr PE=1 SV=1	1	0.000269664	106.44	1	K	PRRRLTELLLRTATEKPGVEEAARQALASRA	X;X;X;X;X;X;X;X;X;X;X;X;X;X;X;Acetyl (K);X;X;X;X;X;X;X;X;X;X;X;X;X;X;X	XXXXXXXXXXXPPPPPPPPPPPPPXXXXXXX	TATEK(1)PGVEEAAR	5	2	-2.7572		28307;28308;28309;28310;28311;28312	28312	45343	35146	44620	36439	36628	38937
Q61598	164	Q61598	Q61598	sp|Q61598|GDIB_MOUSE Rab GDP dissociation inhibitor beta OS=Mus musculus OX=10090 GN=Gdi2 PE=1 SV=1	1	0.0079328	78.093	1	K	NFDEKDPRTFEGVDPKKTSMRDVYKKFDLGQ	X;X;X;X;X;X;X;X;X;X;X;X;X;X;X;Acetyl (K);X;X;X;X;X;X;X;X;X;X;X;X;X;X;X	XXXXXXXXPPPPPPPPPXXXXXXXXXXXXXX	TFEGVDPK(1)K	8	2	-0.19877		29283;29284;29285;29286;29287	29287	178920	184100	173470	188840	173400	0
Q61598	293	Q61598	Q61598	sp|Q61598|GDIB_MOUSE Rab GDP dissociation inhibitor beta OS=Mus musculus OX=10090 GN=Gdi2 PE=1 SV=1	1	0.00673936	51.322	1	K	KQLICDPSYVKDRVEKVGQVIRVICILSHPI	X;X;X;X;X;X;X;X;X;X;X;X;X;X;X;Acetyl (K);X;X;X;X;X;X;X;X;X;X;X;X;X;X;X	XXXXXXXXXXXXXPPPPPPPPPXXXXXXXXX	VEK(1)VGQVIR	3	2	0.19444		35867;35868	35868	9660.9	0	7405	0	0	0
Q61937	265	Q61937	Q61937	sp|Q61937|NPM_MOUSE Nucleophosmin OS=Mus musculus OX=10090 GN=Npm1 PE=1 SV=1	1	0.000583461	87.99	1	K	QASIEKGGSLPKVEAKFINYVKNCFRMTDQE	X;X;X;X;X;X;X;X;X;X;X;X;X;X;X;Acetyl (K);X;X;X;X;X;X;X;X;X;X;X;X;X;X;X	XXXXXXXXXXXXPPPPPPPPPPXXXXXXXXX	VEAK(1)FINYVK	4	2	-0.70947		35743;35744;35745;35746;35747;35748	35748	466460	395720	463250	328960	359450	402200
Q61941	117	Q61941	Q61941	sp|Q61941|NNTM_MOUSE NAD(P) transhydrogenase, mitochondrial OS=Mus musculus OX=10090 GN=Nnt PE=1 SV=2	1	9.44602e-111	229.54	1	K	PDDLYRAAGAQIQGMKEVLASDLVVKVRAPM	X;X;X;X;X;X;X;X;X;X;X;X;X;X;X;Acetyl (K);X;X;X;X;X;X;X;X;X;X;X;X;X;X;X	XXXXXXPPPPPPPPPPPPPPPPPPPPXXXXX	AAGAQIQGMK(1)EVLASDLVVK	10	2	-1.0408		115;116;117;118;119;120	120	119070	335820	285090	121030	262740	332190
Q61941	403	Q61941	Q61941	sp|Q61941|NNTM_MOUSE NAD(P) transhydrogenase, mitochondrial OS=Mus musculus OX=10090 GN=Nnt PE=1 SV=2	1	8.1179e-23	191.44	1	K	YSNNITKLLKAISPDKDNFHFEVKDDFDFGT	X;X;X;X;X;X;Acetyl (K);X;X;X;X;X;X;X;X;Acetyl (K);X;X;X;X;X;X;X;X;X;X;X;X;X;X;X	XXXXXXXXXXPPPPPPPPPPPPPPXXXXXXX	AISPDK(1)DNFHFEVK	6	2	1.2186		1335;1336;1337;1338;1339;1340;1341	1341	2633400	4448100	3136900	1714700	3239200	4435800
Q61941	70	Q61941	Q61941	sp|Q61941|NNTM_MOUSE NAD(P) transhydrogenase, mitochondrial OS=Mus musculus OX=10090 GN=Nnt PE=1 SV=2	1	1.29866e-06	98.616	1	K	KQLTVGVPKEIFQNEKRVALSPAGVQALVKQ	X;X;X;X;X;X;X;X;X;X;X;X;X;X;X;Acetyl (K);X;X;X;X;X;X;X;X;X;X;X;X;X;X;X	XXXXXXXXXPPPPPPPPXXXXXXXXXXXXXX	EIFQNEK(1)R	7	2	-0.28155		4856;4857;4858;4859;4860;4861	4861	1184700	1543500	2050200	218370	941130	1310800
Q61941	224	Q61941	Q61941	sp|Q61941|NNTM_MOUSE NAD(P) transhydrogenase, mitochondrial OS=Mus musculus OX=10090 GN=Nnt PE=1 SV=2	1	9.43342e-45	183.56	1	K	NHFGRFFTGQITAAGKVPPAKILIVGGGVAG	X;X;X;X;X;X;X;X;X;X;X;X;X;X;X;Acetyl (K);X;X;X;X;Acetyl (K);X;X;X;X;X;X;X;X;X;X	XXXXXPPPPPPPPPPPPPPPPXXXXXXXXXX	FFTGQITAAGK(1)VPPAK	11	2	-0.78822		6066;6067;6068;6069;6070;6071;6072;6073;6074;6075;6076;6077;6078;6079;6080;6081;6082;6083;6084;6085;6086;6087	6087	2078600	2812000	1658400	1004700	2179800	3691600
Q61941	229	Q61941	Q61941	sp|Q61941|NNTM_MOUSE NAD(P) transhydrogenase, mitochondrial OS=Mus musculus OX=10090 GN=Nnt PE=1 SV=2	1	7.57521e-07	64.135	1	K	FFTGQITAAGKVPPAKILIVGGGVAGLASAG	X;X;X;X;X;X;X;X;X;X;X;X;X;X;X;Acetyl (K);X;X;X;X;X;X;X;X;X;X;X;X;X;X;X	XXXXXXXXXXXPPPPPPPPPPPPPPPPPPPP	VPPAK(1)ILIVGGGVAGLASAGAAK	5	2	-0.48365		37345;37346;37347;37348;37349	37349	0	21286	19424	0	22374	39321
Q61941	397	Q61941	Q61941	sp|Q61941|NNTM_MOUSE NAD(P) transhydrogenase, mitochondrial OS=Mus musculus OX=10090 GN=Nnt PE=1 SV=2	1	1.68027e-13	106.11	1	K	TQASTLYSNNITKLLKAISPDKDNFHFEVKD	X;X;X;X;X;X;X;X;X;X;X;X;X;X;X;Acetyl (K);X;X;X;X;X;Acetyl (K);X;X;X;X;X;X;X;X;X	XXXXXXXXXXXXXPPPPPPPPPPPPPPPPPX	LLK(1)AISPDKDNFHFEVK	3	3	-0.67286		17613;17614;17615;17616;17617;17618;17619;17620;17621	17615	84275	195920	115710	54226	124920	212480
Q61941	768	Q61941	Q61941	sp|Q61941|NNTM_MOUSE NAD(P) transhydrogenase, mitochondrial OS=Mus musculus OX=10090 GN=Nnt PE=1 SV=2	1	9.40881e-12	165.94	1	K	FSGSLVAYGKLQGILKSAPLLLPGRHALNAG	X;X;X;X;X;X;X;X;X;X;X;X;X;X;X;Acetyl (K);X;X;X;X;X;X;X;X;X;X;X;X;X;X;X	XXXXXXXXXXPPPPPPPPPPPPPPPXXXXXX	LQGILK(1)SAPLLLPGR	6	2	-0.031661		18281;18282;18283;18284;18285;18286	18286	214220	342950	119010	78009	307970	451350
Q61941	394	Q61941	Q61941	sp|Q61941|NNTM_MOUSE NAD(P) transhydrogenase, mitochondrial OS=Mus musculus OX=10090 GN=Nnt PE=1 SV=2	1	2.44092e-144	317.27	1	K	RMATQASTLYSNNITKLLKAISPDKDNFHFE	X;Oxidation (M);X;X;X;X;X;X;X;X;X;X;X;X;X;Acetyl (K);X;X;Acetyl (K);X;X;X;X;X;Acetyl (K);X;X;X;X;X;X	XPPPPPPPPPPPPPPPPPPXXXXXXXXXXXX	MATQASTLYSNNITK(1)LLK	15	2	-3.5811		19512;19513;19514;19515;19516;19517;19518;19519;19520;19521;19522	19522	2617200	4573100	2563200	967040	2633900	3625500
Q61941	451	Q61941	Q61941	sp|Q61941|NNTM_MOUSE NAD(P) transhydrogenase, mitochondrial OS=Mus musculus OX=10090 GN=Nnt PE=1 SV=2	1	0.0358547	42.296	1	K	FPAPTPKNIPEEAPVKPKTVAELEAEKAGTV	X;X;X;X;X;X;X;X;X;X;X;X;X;X;X;Acetyl (K);X;X;X;X;X;X;X;X;X;X;X;X;X;X;X	XXXXXXXPPPPPPPPPPPXXXXXXXXXXXXX	NIPEEAPVK(1)PK	9	2	-2.0269		21070	21070	0	0	0	0	0	190920
Q61941	1070	Q61941	Q61941	sp|Q61941|NNTM_MOUSE NAD(P) transhydrogenase, mitochondrial OS=Mus musculus OX=10090 GN=Nnt PE=1 SV=2	1	6.59974e-06	87.053	1	K	PIFYKPNTAMLLGDAKKTCDALQAKVRESYQ	X;X;X;X;X;X;X;X;X;X;X;X;X;X;X;Acetyl (K);X;X;X;X;X;X;X;X;Acetyl (K);X;X;X;X;X;X	XXXXXPPPPPPPPPPPPXXXXXXXXXXXXXX	PNTAMLLGDAK(1)K	11	2	0.55802		22632;22633;22634;22635;22636;22637	22637	30440	51196	16380	5913	39465	54940
Q61941	100	Q61941	Q61941	sp|Q61941|NNTM_MOUSE NAD(P) transhydrogenase, mitochondrial OS=Mus musculus OX=10090 GN=Nnt PE=1 SV=2	1	1.26245e-10	104.92	1	K	QGFNVVVESGAGEASKFPDDLYRAAGAQIQG	X;X;X;X;X;X;X;X;X;X;X;X;X;X;X;Acetyl (K);X;X;X;X;X;X;X;X;X;X;X;X;X;X;X	PPPPPPPPPPPPPPPPPPPPPPPXXXXXXXX	QGFNVVVESGAGEASK(1)FPDDLYR	16	2	-1.312		23371	23371	0	0	40362	0	0	0
Q61941	1079	Q61941	Q61941	sp|Q61941|NNTM_MOUSE NAD(P) transhydrogenase, mitochondrial OS=Mus musculus OX=10090 GN=Nnt PE=1 SV=2	1	1.50786e-12	109.22	1	K	MLLGDAKKTCDALQAKVRESYQK________	X;X;X;X;X;X;Acetyl (K);X;X;X;X;X;X;X;X;Acetyl (K);X;X;X;X;X;X;X;X;X;X;X;X;X;X;X	XXXXXXXXPPPPPPPPPPXXXXXXXXXXXXX	TCDALQAK(1)VR	8	2	-0.43779		28432;28433;28434;28435;28436;28437	28437	147310	186650	105680	64109	131830	215200
Q62234	1385	Q62234	Q62234	sp|Q62234|MYOM1_MOUSE Myomesin-1 OS=Mus musculus OX=10090 GN=Myom1 PE=1 SV=2	1	1.53926e-06	107.69	1	K	HIVWYKDEREISVDEKHDFKDGICTLLITEF	X;X;X;X;X;X;X;X;X;X;X;X;X;X;X;Acetyl (K);X;X;X;X;X;X;X;X;X;X;X;X;X;X;X	XXXXXXXXXPPPPPPPPPPPXXXXXXXXXXX	EISVDEK(1)HDFK	7	2	-1.0285		4891;4892;4893;4894	4894	14349	12665	18341	0	9132.9	0
Q62234	272	Q62234	Q62234	sp|Q62234|MYOM1_MOUSE Myomesin-1 OS=Mus musculus OX=10090 GN=Myom1 PE=1 SV=2	1	0.000500129	77.483	1	K	APEFIIKPRSHTVWEKENVKLHCSVAGWPEP	X;X;X;X;X;X;X;X;X;X;X;X;X;X;X;Acetyl (K);X;X;X;X;X;X;X;X;X;X;X;X;X;X;X	XXXXXXXXXPPPPPPPPPPPXXXXXXXXXXX	SHTVWEK(1)ENVK	7	2	1.9133		25653	25653	8752.1	0	0	0	0	0
Q62234	33	Q62234	Q62234	sp|Q62234|MYOM1_MOUSE Myomesin-1 OS=Mus musculus OX=10090 GN=Myom1 PE=1 SV=2	1	0.00235426	81.682	1	K	RNKDLRTTMSHYQQEKKRSAVYTHGSTAYSS	X;X;X;X;X;X;X;X;X;X;X;X;X;X;X;Acetyl (K);X;X;X;X;X;X;X;X;X;X;X;X;X;X;X	XXXXXXPPPPPPPPPPPXXXXXXXXXXXXXX	TTMSHYQQEK(1)K	10	2	-0.32099		33860;33861	33861	6911.7	3682.8	0	0	0	0
Q62234	590	Q62234	Q62234	sp|Q62234|MYOM1_MOUSE Myomesin-1 OS=Mus musculus OX=10090 GN=Myom1 PE=1 SV=2	1	0.000882932	101.76	1	K	PSRVSEPVAALDPAEKARLKSHPSAPWTGQI	X;X;X;X;X;X;X;X;X;X;X;X;X;X;X;Acetyl (K);X;X;X;X;X;X;X;X;X;X;X;X;X;X;X	XXXPPPPPPPPPPPPPPPXXXXXXXXXXXXX	VSEPVAALDPAEK(1)AR	13	2	-0.03123		37468	37468	18145	0	0	0	0	0
Q62234	1273	Q62234	Q62234	sp|Q62234|MYOM1_MOUSE Myomesin-1 OS=Mus musculus OX=10090 GN=Myom1 PE=1 SV=2	1	0.000632461	54.603	1	K	SYIFNEKEIFEGPKYKMHIDRNTGIIEMFME	X;X;X;X;X;X;X;X;X;X;X;X;X;X;X;Acetyl (K);X;X;X;X;X;X;X;X;X;X;X;X;X;X;X	XXXXXXXXXXXXXXPPPPPPPXXXXXXXXXX	YK(1)MHIDR	2	2	1.7881		39477;39478;39479;39480;39481	39481	13268	10293	13672	7744.3	10155	0
Q62318	378	Q62318	Q62318	sp|Q62318|TIF1B_MOUSE Transcription intermediary factor 1-beta OS=Mus musculus OX=10090 GN=Trim28 PE=1 SV=3	1	1.74341e-08	67.918	1	K	LLSKKLIYFQLHRALKMIVDPVEPHGEMKFQ	X;X;X;X;X;X;X;X;X;X;X;X;X;X;X;Acetyl (K);X;X;X;X;X;X;X;X;X;X;X;X;X;X;X	XXXXXXXXXXXXXPPPPPPPPPPPPPPPPXX	ALK(1)MIVDPVEPHGEMK	3	2	-1.0342		1601;1602;1603;1604;1605;1606	1606	14392	15065	9916.1	11086	6653.1	2278
Q62418	288	Q62418	Q62418	sp|Q62418|DBNL_MOUSE Drebrin-like protein OS=Mus musculus OX=10090 GN=Dbnl PE=1 SV=2	1	2.2306e-14	166.46	1	K	ERAMSTTSVTSSQPGKLRSPFLQKQLTQPET	X;X;X;X;X;X;X;X;X;X;X;X;X;X;X;Acetyl (K);X;X;X;X;X;X;X;X;X;X;X;X;X;X;X	XXPPPPPPPPPPPPPPPPXXXXXXXXXXXXX	AMSTTSVTSSQPGK(1)LR	14	2	-2.024		1899;1900;1901	1901	7310.1	6701.3	0	2726.9	0	0
Q62425	74	Q62425	Q62425	sp|Q62425|NDUA4_MOUSE Cytochrome c oxidase subunit NDUFA4 OS=Mus musculus OX=10090 GN=Ndufa4 PE=1 SV=2	1	3.33973e-10	164.79	1	K	PNEQYKFYSVNVDYSKLKKEGPDF_______	X;X;X;X;X;X;X;X;X;X;X;X;X;X;X;Acetyl (K);X;X;X;X;X;X;X;X;X;X;X;X;X;X;X	XXXXXXPPPPPPPPPPPPXXXXXXXXXXXXX	FYSVNVDYSK(1)LK	10	2	-1.5015		7336;7337;7338;7339	7339	330730	0	268840	60771	217390	0
Q62425	64	Q62425	Q62425	sp|Q62425|NDUA4_MOUSE Cytochrome c oxidase subunit NDUFA4 OS=Mus musculus OX=10090 GN=Ndufa4 PE=1 SV=2	1	0.00440272	70.854	1	K	NNPEPWNKLGPNEQYKFYSVNVDYSKLKKEG	X;X;X;X;X;X;X;X;X;X;X;X;X;X;X;Acetyl (K);X;X;X;X;X;X;X;X;X;Acetyl (K);X;X;X;X;X	XXXXXXXXPPPPPPPPPPPPPPPPPPXXXXX	LGPNEQYK(1)FYSVNVDYSK	8	2	-0.458		16464	16464	0	0	40635	0	0	0
Q62425	56	Q62425	Q62425	sp|Q62425|NDUA4_MOUSE Cytochrome c oxidase subunit NDUFA4 OS=Mus musculus OX=10090 GN=Ndufa4 PE=1 SV=2	1	2.15865e-34	173.45	1	K	PDVSWDRKNNPEPWNKLGPNEQYKFYSVNVD	X;X;X;X;X;X;X;X;X;X;X;X;X;X;X;Acetyl (K);X;X;X;X;X;X;X;Acetyl (K);X;X;X;X;X;X;X	XXXXXXXXPPPPPPPPPPPPPPPPXXXXXXX	NNPEPWNK(1)LGPNEQYK	8	2	-0.93378		21410;21411;21412;21413;21414;21415	21415	268450	180690	134880	37149	163710	35126
Q62425	10	Q62425	Q62425	sp|Q62425|NDUA4_MOUSE Cytochrome c oxidase subunit NDUFA4 OS=Mus musculus OX=10090 GN=Ndufa4 PE=1 SV=2	1	0.0131649	45.603	1	K	______MLRQILGQAKKHPSLIPLFVFIGAG	X;X;X;X;X;X;X;X;X;X;X;X;X;X;X;Acetyl (K);X;X;X;X;X;X;X;X;X;X;X;X;X;X;X	XXXXXXXXXPPPPPPPPXXXXXXXXXXXXXX	QILGQAK(1)K	7	2	-0.57319		23539;23540;23541;23542;23543;23544	23544	389220	285080	352550	185910	387740	213030
Q63918	102	Q63918	Q63918	sp|Q63918|CAVN2_MOUSE Caveolae-associated protein 2 OS=Mus musculus OX=10090 GN=Cavin2 PE=1 SV=3	1	9.56931e-08	128.18	1	K	EGSVKGIQNDLTKLSKYQASTSNTVSKLLEK	X;X;X;X;X;X;X;X;X;X;X;X;X;X;X;Acetyl (K);X;X;X;X;X;X;X;X;X;X;Acetyl (K);X;X;X;X	XXXXXXXXXXXXXPPPPPPPPPPPPPPXXXX	LSK(1)YQASTSNTVSK	3	2	-0.64862		18563;18564;18565;18566;18567	18567	18855	14614	5726.3	0	3443.4	3825
Q63918	113	Q63918	Q63918	sp|Q63918|CAVN2_MOUSE Caveolae-associated protein 2 OS=Mus musculus OX=10090 GN=Cavin2 PE=1 SV=3	1	7.73278e-06	99.302	1	K	TKLSKYQASTSNTVSKLLEKSRKVSAHTRAV	X;X;X;X;X;X;X;X;X;X;X;X;X;X;X;Acetyl (K);X;X;X;X;X;X;X;X;X;X;X;X;X;X;X	XXXXXPPPPPPPPPPPPPPPXXXXXXXXXXX	YQASTSNTVSK(1)LLEK	11	2	-3.1111		39728;39729	39729	13056	8996	0	0	0	0
Q63918	140	Q63918	Q63918	sp|Q63918|CAVN2_MOUSE Caveolae-associated protein 2 OS=Mus musculus OX=10090 GN=Cavin2 PE=1 SV=3	1	3.15433e-05	71.616	1	K	TRAVRERLERQCVQVKRLENNHAQLLRRNHF	X;X;X;X;X;X;X;X;X;X;X;X;X;X;X;Acetyl (K);X;X;X;X;X;X;X;X;X;X;X;X;X;X;X	XXXXXXXXXXPPPPPPPXXXXXXXXXXXXXX	QCVQVK(1)R	6	2	-0.71251		23173;23174;23175;23176	23176	67761	65483	72774	68493	0	0
Q63943	504	Q63943	Q63943	sp|Q63943|MEF2D_MOUSE Myocyte-specific enhancer factor 2D OS=Mus musculus OX=10090 GN=Mef2d PE=1 SV=2	1	0.000146214	78.649	1	K	LLRPAPEPEAEGSAVKRMRLDTWTLK_____	X;X;X;X;X;X;X;X;X;X;X;X;X;X;X;Acetyl (K);X;X;X;X;X;X;X;X;X;X;X;X;X;X;X	XXXPPPPPPPPPPPPPPXXXXXXXXXXXXXX	PAPEPEAEGSAVK(1)R	13	2	-0.695		21948;21949;21950;21951;21952	21952	66659	87949	89300	82661	74236	0
Q64433	8	Q64433	Q64433	sp|Q64433|CH10_MOUSE 10 kDa heat shock protein, mitochondrial OS=Mus musculus OX=10090 GN=Hspe1 PE=1 SV=2	1	0.00435753	51.002	1	K	________MAGQAFRKFLPLFDRVLVERSAA	X;X;X;X;X;X;X;X;X;X;X;X;X;X;X;Acetyl (K);X;X;X;X;X;X;X;X;X;X;X;X;X;X;X	XXXXXXXXXXXXXXXPPPPPPPPXXXXXXXX	K(1)FLPLFDR	1	2	0.57161		14913;14914;14915;14916;14917;14918	14918	145830	153410	171640	41332	134650	123860
Q64433	66	Q64433	Q64433	sp|Q64433|CH10_MOUSE 10 kDa heat shock protein, mitochondrial OS=Mus musculus OX=10090 GN=Hspe1 PE=1 SV=2	1	4.03473e-11	152.9	1	K	SGGKGKSGEIEPVSVKVGDKVLLPEYGGTKV	X;X;X;X;X;X;X;X;X;X;X;X;X;X;X;Acetyl (K);X;X;X;Acetyl (K);X;X;X;X;X;X;X;X;X;X;X	XXXXXXPPPPPPPPPPPPPPXXXXXXXXXXX	SGEIEPVSVK(1)VGDK	10	2	-1.5965		25343;25344;25345;25346;25347;25348;25349	25349	333680	252270	243550	178490	246700	238260
Q64433	70	Q64433	Q64433	sp|Q64433|CH10_MOUSE 10 kDa heat shock protein, mitochondrial OS=Mus musculus OX=10090 GN=Hspe1 PE=1 SV=2	1	0.00139773	61.654	1	K	GKSGEIEPVSVKVGDKVLLPEYGGTKVVLDD	X;X;X;X;X;X;X;X;X;X;X;X;X;X;X;Acetyl (K);X;X;X;X;X;X;X;X;X;X;X;X;X;X;X	XXXXXXXXXXXXPPPPPPPPPPPPPPXXXXX	VGDK(1)VLLPEYGGTK	4	2	-1.8599		36149;36150;36151;36152;36153;36154	36154	379680	336590	252770	273280	323620	283910
Q64433	86	Q64433	Q64433	sp|Q64433|CH10_MOUSE 10 kDa heat shock protein, mitochondrial OS=Mus musculus OX=10090 GN=Hspe1 PE=1 SV=2	1	3.37409e-06	142.34	1	K	VLLPEYGGTKVVLDDKDYFLFRDSDILGKYV	X;X;X;X;X;X;X;X;X;X;X;X;X;X;X;Acetyl (K);X;X;X;X;X;X;X;X;X;X;X;X;X;X;X	XXXXXXXXXXPPPPPPPPPPPPXXXXXXXXX	VVLDDK(1)DYFLFR	6	2	-3.2053		37965;37966;37967;37968;37969;37970	37970	75965	70714	134750	49534	75035	82963
Q64436;Q6PIE5;Q6PIC6;Q9WV27;Q9Z1W8;Q8VDN2	782;770;763;782;784;773	Q64436;Q6PIE5;Q8VDN2	Q8VDN2	sp|Q64436|ATP4A_MOUSE Potassium-transporting ATPase alpha chain 1 OS=Mus musculus OX=10090 GN=Atp4a PE=1 SV=3;sp|Q6PIE5|AT1A2_MOUSE Sodium/potassium-transporting ATPase subunit alpha-2 OS=Mus musculus OX=10090 GN=Atp1a2 PE=1 SV=1;sp|Q6PIC6|AT1A3_MOUSE Sodi	1	0.0160277	55.953	1	K	IVTGVEEGRLIFDNLKKSIAYTLTSNIPEIT;IVTGVEQGRLIFDNLKKSIAYTLTKNIPELT	X;X;X;X;X;X;X;X;X;X;X;X;X;X;X;Acetyl (K);X;X;X;X;X;X;X;X;X;X;X;X;X;X;X	XXXXXXXXXPPPPPPPPXXXXXXXXXXXXXX	LIFDNLK(1)K	7	2	-1.6503		16805;16806	16806	0	0	45632	0	46378	0
Q64467	331	Q64467	Q64467	sp|Q64467|G3PT_MOUSE Glyceraldehyde-3-phosphate dehydrogenase, testis-specific OS=Mus musculus OX=10090 GN=Gapdhs PE=1 SV=1	1	0.0153924	36.092	1	K	GAAKAVGKVIPELKGKLTGMAFRVPTPNVSV	X;X;X;X;X;X;X;X;X;X;X;X;X;X;X;Acetyl (K);X;X;X;X;X;X;X;X;X;X;X;X;X;X;X	XXXXXXXXXXXXXXPPPPPPPPPXXXXXXXX	GK(1)LTGMAFR	2	2	-1.9973		8566	8566	27162	0	0	0	0	0
Q64475	17	Q64475	Q64475	sp|Q64475|H2B1B_MOUSE Histone H2B type 1-B OS=Mus musculus OX=10090 GN=H2bc3 PE=1 SV=3	1	1.11506e-06	28.299	2	K	PEPSKSAPAPKKGSKKAISKAQKKDGKKRKR	X;X;X;X;X;X;X;X;X;X;X;X;X;X;X;Acetyl (K);X;X;X;Acetyl (K);X;X;X;X;X;X;X;X;X;X;X	XXXXXXXXXXXXXXXPPPPPPPPXXXXXXXX	K(1)AISK(1)AQK	1	2	-0.34097		14773;14774;14775;14776;14777;14778	14778	39117	23369	31892	23749	28289	22233
Q64475	21	Q64475	Q64475	sp|Q64475|H2B1B_MOUSE Histone H2B type 1-B OS=Mus musculus OX=10090 GN=H2bc3 PE=1 SV=3	1	1.11506e-06	28.299	2	K	KSAPAPKKGSKKAISKAQKKDGKKRKRSRKE	X;X;X;X;X;X;X;X;X;X;X;Acetyl (K);X;X;X;Acetyl (K);X;X;X;X;X;X;X;X;X;X;X;X;X;X;X	XXXXXXXXXXXPPPPPPPPXXXXXXXXXXXX	K(1)AISK(1)AQK	5	2	-0.34097		14773;14774;14775;14776;14777;14778	14778	39117	23369	31892	23749	28289	22233
Q64521	634	Q64521	Q64521	sp|Q64521|GPDM_MOUSE Glycerol-3-phosphate dehydrogenase, mitochondrial OS=Mus musculus OX=10090 GN=Gpd2 PE=1 SV=2	1	0.00662342	74.57	1	K	SLLPSDIDRYKKRFHKFDEDEKGFITIVDVQ	X;X;X;X;X;X;X;X;X;X;X;X;X;X;X;Acetyl (K);X;X;X;X;X;X;X;X;X;X;X;X;X;X;X	XXXXXXXXXXXXXPPPPPPPPPXXXXXXXXX	FHK(1)FDEDEK	3	2	1.6508		6285;6286;6287;6288	6288	0	35224	69162	90177	38575	0
[truncated: 1,038 more rows]

## Sheet: Confident site(s)
Supplementary Table 1（Confident site(s)）：4D‑Label‑Free Acetylation Mass Spectrometry Analysis of Cardiac Tissue from Mice Treated with E‑ASA for Three Weeks and Vehicle Controls
Accession：Accession ID
Gene Name：Gene Name
Proteins：Protein IDs
Positions within proteins：The position of the site in the protein sequence
[truncated: 1,657 more rows]

## Sheet: E-AsA_Vehicle
Supplementary Table 1（E-AsA_Vehicle）：4D‑Label‑Free Acetylation Mass Spectrometry Analysis of Cardiac Tissue from Mice Treated with E‑ASA for Three Weeks and Vehicle Controls
[truncated: 381 more rows]
